# Supplementary material for: The International Centre for the Uplands - Cumbria.
Source: HighWire-hosted journal article supplement (doi:10.1101/gr.161265.113), 2004-01-01
Supplement: Supplemental_Material.docx [file Supplemental_Material.docx]

Supplementary Material:

**Supplementary Table**

| **DNA** | | | | | |
| --- | --- | --- | --- | --- | --- |
| **ID** | **# of reads** | **# of mapped reads to rCRS** | **% mapped reads to rCRS** | **# of positions covered** | **Mean coverage** |
| GM14381 | 677294985 | 1121921 | 0.17 | 16340 | 5013 |
| GM14452 | 709074221 | 1906023 | 0.27 | 16529 | 9587 |
| GM14468 | 746560279 | 1660250 | 0.22 | 16494 | 8164 |
| GM14432 | 1173348066 | 1302342 | 0.11 | 16440 | 5835 |
| GM14447 | 587181365 | 1028243 | 0.18 | 16376 | 4189 |
| **RNA** | | | | | |
| **ID** | **# of reads** | **# of mapped reads to rCRS** | **% mapped reads to rCRS** | **# of positions covered** | **Mean coverage** |
| GM14381 | 88,561,952 | 3,436,982 | 3.9 | 14,377 | 15,916 |
| GM14452 | 108,180,232 | 7,591,065 | 7.0 | 15,196 | 34,961 |
| GM14468 | 131,293,549 | 5,524,946 | 4.2 | 14,825 | 25,112 |
| GM14432 | 100,107,660 | 4,894,867 | 4,9 | 14,792 | 23,022 |
| GM14447 | 89,433,748 | 4,600,282 | 5.1 | 14,570 | 21,636 |

**Supplementary Table 1: Summary statistics of deep sequencing data.**  The percentage of mapped reads to rCRS is the percentage of reads that uniquely mapped to the revised Cambridge Reference Sequence (rCRS, NC_012920); Number of positions covered: the number of positions within the mtDNA that had a minimal coverage of 1,000 sequence reads. In addition the mean coverage per position is indicated.

**Supplementary Table 2: Mapping of MiSEQ reads derived from purely amplified polycistronic fragments to the rCRS.** The reads are derived from the purely amplified polycistronic fragments, as evident from the exclusive sequence coverage between positions 1580 – 3414. Notice the extreme high coverage around position 2617 and adjacent to the beginning of each of the PCR amplified fragments – sequencing was performed using already existing PCR fragment edges without shearing (see Materials and Methods). Notably, sequence reads were virtually absent outside of our amplified fragments (representing either polycistronic or mature transcripts from other mtDNA regions), thus reducing the possibility that the RDDs in position 2617 were derived from leakage of mature 16S rRNA into our sequencing data. Position 2617 is highlighted in yellow.

**Supplementary Table 3: RNA annotation table of all 5 tested individuals.**

pos – mtDNA position according to the rCRS; hq – high quality coverage; indels – number of indels identified at this position; best – the best base identified at a given position; best count – high quality reads harboring the best base; second_best – second identified best base; second_best_count - high quality reads harboring the second best base; second_best_for - high quality reads harboring the second best base forward reads; second_best_rev - high quality reads harboring the second best base reverse reads; fraction_percent – percent of the second best base out of the entire high quality reads; A or C or T or G – number of high quality reads harboring an adenine, a cytosine, a thymine or a guanine respectively in a specific position; A.for (or C.for or T.for or G.for) - number of forward high quality reads harboring an adenine, a cytosine, a thymine or a guanine respectively in a specific position; A.rev (or C.rev or T. rev or G. rev) number of reverse high quality reads harbor Adenin, a cytosine, a thymine or a guanine respectively in a specific position; best_count.for - high quality forward reads harboring the best base; best_count.rev - high quality reverse reads harboring the best base; LCR – low complexity repeat regions; gene – mtDNA gene annotation at a given nucleotide position; coding – detailed mtDNA gene annotation; Filter A – removed by filter A (1=yes, 0=no); Filter B – removed by filter B (1=yes, 0=no); Filter C – removed by filter C (1=yes, 0=no); Filter D – removed by filter D (1=yes, 0=no). Short explanation of color highlighted positions is included at the bottom of the table.

| Primer Number | Position (corresponding to the rCRS) | Orientation | Sequence |
| --- | --- | --- | --- |
| 1 | 2070 - 2090 | forward | AATTTGCCCACAGAACCCTC |
| 2 | 2920 - 2941 | reverse | GACTCTAGAATAGGATTGCGC |
| 3 | 2499 - 2520 | Forward | TACCAAAAACATCACCTCTAGC |
| 4 | 2937 - 2916 | reverse | TATCCCTAGGGTAACTTGTTCC |
| 5 | 2207 - 2227 | forward | TCAAGCTCAACACCCACTACC |
| 6 | 2670 - 2651 | reverse | GGCAGGTCAATTTCACTGGT |
| 7 | 1580 - 1601 | Forward | TGGAAAGTGCACTTGGACGAAC |
| 8 | 2640 - 2621 | reverse | GGAGCCATTCATACAGGTCC |
| 9 | 2655 - 2636 | reverse | CAGCTGAACCCTCGTGGAGC |
| 10 | 2578 - 2597 | forward | CCTAACCGTGCAAAGGTAGC |
| 11 | 3414 - 3395 | reverse | GCCTTTGCGTAGTTGTATAT |
| 12 | 2593 - 2612 | forward | GTAGCATAATCACTTGTTCC |

**Supplementary Table 4: Primers list**

**Supplementary Figure legends**

**Supplementary Figure 1: MtDNA nucleotide positions with ≥1,000 sequence reads coverage per individual**. X axis – nucleotide positions with >1000 sequence reads coverage along the mtDNA in the tested samples. MtDNA positions 1-16,569 are from left to right. Each horizontal dotted line correspond to the indicated tested samples. Each position is indicated by a dot. Only the positions with a minimal coverage of 1,000 sequence reads are marked. Sample IDs are indicated in the Y axis in DNA (A) and RNA (B).

**Supplementary Figure 2: Sanger sequencing of the 2617 RDD**: Sanger sequence traces encompassing sites 2612 to 2622 in the human mtDNA in several cell types and individuals. The arrows indicate position 2617 in each individual. (a) GM14468 DNA. (b) GM14468 RNA. (c) SHSY5Y DNA. (d) SHSY5Y RNA. (e) ChubS7 DNA. (f) ChubS7 RNA. (g) Colon DNA. (h) Colon RNA. (i) 65080 DNA. (j) 65080 liver RNA. (k) 65080 skeletal muscle RNA. (l) 65080 brain RNA. (m) 64998 DNA. (n) 64998 liver RNA. (o) 64998 skeletal muscle RNA. (p) 64998 brain RNA.

**Supplementary Figure 3: Sequence alignment of the top 30 BLAT hits from UCSC to a 100 bp fragment encompassing the RDDs at mtDNA position 2617.** The left column lists the BLAT hit loci and exact chromosomal coordinates in the human genome. MtDNA position 2617 is highlighted in yellow. Red highlight – nucleotide positions showing mutational differences from the mtDNA reference sequence. Notably, none of the red marked changes were identified in our DNA and RNA deep sequence data.

**Supplementary Figure 4: Positions of primers used for PCR amplification of 16S rRNA and flanking sequences:** Amplification of the 16S rRNA and its flanking regions was performed using four primer pairs as described in Materials and Methods. These fragments encompass human mtDNA nucleotide positions 1580-2640, 1580-2655, 2578-3414 and 2593-3414 respectively (rCRS NC_012920). The arrows above the horizontal line (the mtDNA) represent the amplification primers and their orientation.

Numbers indicate reverse and forward amplification primers pairs used for fragments 1-4 of the 16S flanking regions, respectively. Vertical lines indicate gene regions, with the caption underneath representing gene names. MtDNA position 2617 is indicated.

**Supplementary Figure 5: Sequence alignment of mitochondrial 16S RNA from 1755 vertebrates.** MtDNA positions 2608 to 2634 (human coordinates) are aligned and compared to available vertebrate orthologous sequence. This sequence harbors the stems and loop ([Ruiz-Pesini and Wallace 2006](#_ENREF_30)) including position 2617 (framed in red). The 1755 vertebrate species include 941 *Actinopterygii* (ray-finned fishes), 109 *Amphibia* (amphibians), 48 *Testudines* (turtles), 109 *Lepidosauria* (sphenodon, lizards and snakes), 177 *Archosauria* (Crocodilains and birds) and 371 *Mammalia* (mammals). Stem, Loop, Stem columns – mtDNA sequence corresponding to the stem-and-loop structure of 16S rRNA around position 2617.

**Supplementary Figure 6: Phylogenetic analysis of complete mitochondrial sequences from 334 *Eutheria*.** A Maximum Likelihood tree constructed from 334 complete mtDNA *Ehutherian* sequences. Bootstrap scores of 1000 replicates are shown on each branch together with its ancestral state of position 2617. All phylogenetic analyses were performed using MEGA 5.0.

**Supplementary Figure 7: Sanger sequence analysis of position 2617 from DNA and RNA samples of mitochondria from various primates**: *Pongo pigmaeus*: (a) DNA and (b) RNA; *Gorilla gorilla* (c) DNA and (d) RNA; *Macaca mulatta* (e) DNA and (f) RNA; *Lemur katta* (g) DNA and (h) RNA; *Nycticebus coucang* (i) DNA and (j) RNA. Red arrow indicates nucleotide position corresponding to position 2617 in human mtDNA. Numbers on top of each base indicates positions according to the rCRS.

**Supplementary Figure 8: The identified RDDs are not found at the edges of the sequence reads**. A representative IGV viewer chart ([Robinson et al. 2011](#_ENREF_28)) at position 2617 in a representative analyzed sample (GM14447). Upper panel – schematic linear representation of the human mtDNA (rCRS), position 2617 is framed. Numbers at the top part of the figure – nucleotide positions of the rCRS. Lower large panel – schematic representation of the sequence reads encompassing mtDNA position 2617 (thick arrow-like grey bars). Direction of arrow heads are consistent with directions of the reads. Framed red bars – the thymine at position 2617; brown - Guanine, grey - the DNA reference (Adenine).
