# Supplementary material for: The International Centre for the Uplands - Cumbria.
Source: HighWire-hosted journal article supplement (doi:10.1101/gr.161265.113), 2004-01-01
Supplement: Supplemental_Table_1.docx [file Supplemental_Table_1.docx]

| **DNA** | | | | | |
| --- | --- | --- | --- | --- | --- |
| **ID** | **# of reads** | **# of mapped reads to rCRS** | **% mapped reads to rCRS** | **# of positions covered** | **Mean coverage** |
| GM14381 | 677294985 | 1121921 | 0.17 | 16340 | 5013 |
| GM14452 | 709074221 | 1906023 | 0.27 | 16529 | 9587 |
| GM14468 | 746560279 | 1660250 | 0.22 | 16494 | 8164 |
| GM14432 | 1173348066 | 1302342 | 0.11 | 16440 | 5835 |
| GM14447 | 587181365 | 1028243 | 0.18 | 16376 | 4189 |
| **RNA** | | | | | |
| **ID** | **# of reads** | **# of mapped reads to rCRS** | **% mapped reads to rCRS** | **# of positions covered** | **Mean coverage** |
| GM14381 | 88,561,952 | 3,436,982 | 3.9 | 14,377 | 15,916 |
| GM14452 | 108,180,232 | 7,591,065 | 7.0 | 15,196 | 34,961 |
| GM14468 | 131,293,549 | 5,524,946 | 4.2 | 14,825 | 25,112 |
| GM14432 | 100,107,660 | 4,894,867 | 4,9 | 14,792 | 23,022 |
| GM14447 | 89,433,748 | 4,600,282 | 5.1 | 14,570 | 21,636 |

**Supplementary Table 1: Summary statistics of deep sequencing data.**  The percentage of mapped reads to rCRS is the percentage of reads that uniquely mapped to the revised Cambridge Reference Sequence (rCRS, NC_012920); Number of positions covered: the number of positions within the mtDNA that had a minimal coverage of 1,000 sequence reads. In addition the mean coverage per position is indicated.
