# Supplementary material for: The International Centre for the Uplands - Cumbria.
Source: HighWire-hosted journal article supplement (doi:10.1101/gr.161265.113), 2004-01-01
Supplement: Supplemental_Table_2.xlsx [file Supplemental_Table_2.xlsx]

## Sheet: Sheet1
MtDNA position	High quality reads coverage	Best base	Best base coverage	Second best base	Second best base coverage	Percentage of second best reads from high quality reads	A coverage	C coverage	G coverage	T coverage
1	0	-	0	-	0	0	0	0	0	0
2	0	-	0	-	0	0	0	0	0	0
3	0	-	0	-	0	0	0	0	0	0
4	0	-	0	-	0	0	0	0	0	0
5	0	-	0	-	0	0	0	0	0	0
6	0	-	0	-	0	0	0	0	0	0
7	0	-	0	-	0	0	0	0	0	0
8	0	-	0	-	0	0	0	0	0	0
9	0	-	0	-	0	0	0	0	0	0
10	0	-	0	-	0	0	0	0	0	0
11	0	-	0	-	0	0	0	0	0	0
12	0	-	0	-	0	0	0	0	0	0
13	0	-	0	-	0	0	0	0	0	0
14	0	-	0	-	0	0	0	0	0	0
15	0	-	0	-	0	0	0	0	0	0
16	0	-	0	-	0	0	0	0	0	0
17	0	-	0	-	0	0	0	0	0	0
18	0	-	0	-	0	0	0	0	0	0
19	0	-	0	-	0	0	0	0	0	0
20	0	-	0	-	0	0	0	0	0	0
21	0	-	0	-	0	0	0	0	0	0
22	0	-	0	-	0	0	0	0	0	0
23	0	-	0	-	0	0	0	0	0	0
24	0	-	0	-	0	0	0	0	0	0
25	0	-	0	-	0	0	0	0	0	0
26	0	-	0	-	0	0	0	0	0	0
27	0	-	0	-	0	0	0	0	0	0
28	0	-	0	-	0	0	0	0	0	0
29	0	-	0	-	0	0	0	0	0	0
30	0	-	0	-	0	0	0	0	0	0
31	0	-	0	-	0	0	0	0	0	0
32	0	-	0	-	0	0	0	0	0	0
33	0	-	0	-	0	0	0	0	0	0
34	0	-	0	-	0	0	0	0	0	0
35	0	-	0	-	0	0	0	0	0	0
36	0	-	0	-	0	0	0	0	0	0
37	0	-	0	-	0	0	0	0	0	0
38	0	-	0	-	0	0	0	0	0	0
39	0	-	0	-	0	0	0	0	0	0
40	0	-	0	-	0	0	0	0	0	0
41	0	-	0	-	0	0	0	0	0	0
42	0	-	0	-	0	0	0	0	0	0
43	0	-	0	-	0	0	0	0	0	0
44	0	-	0	-	0	0	0	0	0	0
45	0	-	0	-	0	0	0	0	0	0
46	0	-	0	-	0	0	0	0	0	0
47	0	-	0	-	0	0	0	0	0	0
48	0	-	0	-	0	0	0	0	0	0
49	0	-	0	-	0	0	0	0	0	0
50	0	-	0	-	0	0	0	0	0	0
51	0	-	0	-	0	0	0	0	0	0
52	0	-	0	-	0	0	0	0	0	0
53	0	-	0	-	0	0	0	0	0	0
54	0	-	0	-	0	0	0	0	0	0
55	0	-	0	-	0	0	0	0	0	0
56	0	-	0	-	0	0	0	0	0	0
57	0	-	0	-	0	0	0	0	0	0
58	0	-	0	-	0	0	0	0	0	0
59	0	-	0	-	0	0	0	0	0	0
60	0	-	0	-	0	0	0	0	0	0
61	0	-	0	-	0	0	0	0	0	0
62	0	-	0	-	0	0	0	0	0	0
63	0	-	0	-	0	0	0	0	0	0
64	0	-	0	-	0	0	0	0	0	0
65	0	-	0	-	0	0	0	0	0	0
66	0	-	0	-	0	0	0	0	0	0
67	0	-	0	-	0	0	0	0	0	0
68	0	-	0	-	0	0	0	0	0	0
69	0	-	0	-	0	0	0	0	0	0
70	0	-	0	-	0	0	0	0	0	0
71	0	-	0	-	0	0	0	0	0	0
72	0	-	0	-	0	0	0	0	0	0
73	0	-	0	-	0	0	0	0	0	0
74	0	-	0	-	0	0	0	0	0	0
75	0	-	0	-	0	0	0	0	0	0
76	0	-	0	-	0	0	0	0	0	0
77	0	-	0	-	0	0	0	0	0	0
78	0	-	0	-	0	0	0	0	0	0
79	0	-	0	-	0	0	0	0	0	0
80	0	-	0	-	0	0	0	0	0	0
81	0	-	0	-	0	0	0	0	0	0
82	0	-	0	-	0	0	0	0	0	0
83	0	-	0	-	0	0	0	0	0	0
84	0	-	0	-	0	0	0	0	0	0
85	0	-	0	-	0	0	0	0	0	0
86	0	-	0	-	0	0	0	0	0	0
87	0	-	0	-	0	0	0	0	0	0
88	0	-	0	-	0	0	0	0	0	0
89	0	-	0	-	0	0	0	0	0	0
90	0	-	0	-	0	0	0	0	0	0
91	0	-	0	-	0	0	0	0	0	0
92	0	-	0	-	0	0	0	0	0	0
93	0	-	0	-	0	0	0	0	0	0
94	0	-	0	-	0	0	0	0	0	0
95	0	-	0	-	0	0	0	0	0	0
96	0	-	0	-	0	0	0	0	0	0
97	0	-	0	-	0	0	0	0	0	0
98	0	-	0	-	0	0	0	0	0	0
99	0	-	0	-	0	0	0	0	0	0
100	0	-	0	-	0	0	0	0	0	0
101	0	-	0	-	0	0	0	0	0	0
102	0	-	0	-	0	0	0	0	0	0
103	0	-	0	-	0	0	0	0	0	0
104	0	-	0	-	0	0	0	0	0	0
105	0	-	0	-	0	0	0	0	0	0
106	0	-	0	-	0	0	0	0	0	0
107	0	-	0	-	0	0	0	0	0	0
108	0	-	0	-	0	0	0	0	0	0
109	0	-	0	-	0	0	0	0	0	0
110	0	-	0	-	0	0	0	0	0	0
111	0	-	0	-	0	0	0	0	0	0
112	0	-	0	-	0	0	0	0	0	0
113	0	-	0	-	0	0	0	0	0	0
114	0	-	0	-	0	0	0	0	0	0
115	0	-	0	-	0	0	0	0	0	0
116	0	-	0	-	0	0	0	0	0	0
117	0	-	0	-	0	0	0	0	0	0
118	0	-	0	-	0	0	0	0	0	0
119	0	-	0	-	0	0	0	0	0	0
120	0	-	0	-	0	0	0	0	0	0
121	0	-	0	-	0	0	0	0	0	0
122	0	-	0	-	0	0	0	0	0	0
123	0	-	0	-	0	0	0	0	0	0
124	0	-	0	-	0	0	0	0	0	0
125	0	-	0	-	0	0	0	0	0	0
126	0	-	0	-	0	0	0	0	0	0
127	0	-	0	-	0	0	0	0	0	0
128	0	-	0	-	0	0	0	0	0	0
129	0	-	0	-	0	0	0	0	0	0
130	0	-	0	-	0	0	0	0	0	0
131	0	-	0	-	0	0	0	0	0	0
132	0	-	0	-	0	0	0	0	0	0
133	0	-	0	-	0	0	0	0	0	0
134	0	-	0	-	0	0	0	0	0	0
135	0	-	0	-	0	0	0	0	0	0
136	0	-	0	-	0	0	0	0	0	0
137	0	-	0	-	0	0	0	0	0	0
138	0	-	0	-	0	0	0	0	0	0
139	0	-	0	-	0	0	0	0	0	0
140	0	-	0	-	0	0	0	0	0	0
141	0	-	0	-	0	0	0	0	0	0
142	0	-	0	-	0	0	0	0	0	0
143	0	-	0	-	0	0	0	0	0	0
144	0	-	0	-	0	0	0	0	0	0
145	0	-	0	-	0	0	0	0	0	0
146	0	-	0	-	0	0	0	0	0	0
147	0	-	0	-	0	0	0	0	0	0
148	0	-	0	-	0	0	0	0	0	0
149	0	-	0	-	0	0	0	0	0	0
150	0	-	0	-	0	0	0	0	0	0
151	0	-	0	-	0	0	0	0	0	0
152	0	-	0	-	0	0	0	0	0	0
153	0	-	0	-	0	0	0	0	0	0
154	0	-	0	-	0	0	0	0	0	0
155	0	-	0	-	0	0	0	0	0	0
156	0	-	0	-	0	0	0	0	0	0
157	0	-	0	-	0	0	0	0	0	0
158	0	-	0	-	0	0	0	0	0	0
159	0	-	0	-	0	0	0	0	0	0
160	0	-	0	-	0	0	0	0	0	0
161	0	-	0	-	0	0	0	0	0	0
162	0	-	0	-	0	0	0	0	0	0
163	0	-	0	-	0	0	0	0	0	0
164	0	-	0	-	0	0	0	0	0	0
165	0	-	0	-	0	0	0	0	0	0
166	0	-	0	-	0	0	0	0	0	0
167	0	-	0	-	0	0	0	0	0	0
168	0	-	0	-	0	0	0	0	0	0
169	0	-	0	-	0	0	0	0	0	0
170	0	-	0	-	0	0	0	0	0	0
171	0	-	0	-	0	0	0	0	0	0
172	0	-	0	-	0	0	0	0	0	0
173	0	-	0	-	0	0	0	0	0	0
174	0	-	0	-	0	0	0	0	0	0
175	0	-	0	-	0	0	0	0	0	0
176	0	-	0	-	0	0	0	0	0	0
177	0	-	0	-	0	0	0	0	0	0
178	0	-	0	-	0	0	0	0	0	0
179	0	-	0	-	0	0	0	0	0	0
180	0	-	0	-	0	0	0	0	0	0
181	0	-	0	-	0	0	0	0	0	0
182	0	-	0	-	0	0	0	0	0	0
183	0	-	0	-	0	0	0	0	0	0
184	0	-	0	-	0	0	0	0	0	0
185	0	-	0	-	0	0	0	0	0	0
186	0	-	0	-	0	0	0	0	0	0
187	0	-	0	-	0	0	0	0	0	0
188	0	-	0	-	0	0	0	0	0	0
189	0	-	0	-	0	0	0	0	0	0
190	0	-	0	-	0	0	0	0	0	0
191	0	-	0	-	0	0	0	0	0	0
192	0	-	0	-	0	0	0	0	0	0
193	0	-	0	-	0	0	0	0	0	0
194	0	-	0	-	0	0	0	0	0	0
195	0	-	0	-	0	0	0	0	0	0
196	0	-	0	-	0	0	0	0	0	0
197	0	-	0	-	0	0	0	0	0	0
198	0	-	0	-	0	0	0	0	0	0
199	0	-	0	-	0	0	0	0	0	0
200	0	-	0	-	0	0	0	0	0	0
201	0	-	0	-	0	0	0	0	0	0
202	0	-	0	-	0	0	0	0	0	0
203	0	-	0	-	0	0	0	0	0	0
204	0	-	0	-	0	0	0	0	0	0
205	0	-	0	-	0	0	0	0	0	0
206	0	-	0	-	0	0	0	0	0	0
207	0	-	0	-	0	0	0	0	0	0
208	0	-	0	-	0	0	0	0	0	0
209	0	-	0	-	0	0	0	0	0	0
210	0	-	0	-	0	0	0	0	0	0
211	0	-	0	-	0	0	0	0	0	0
212	0	-	0	-	0	0	0	0	0	0
213	0	-	0	-	0	0	0	0	0	0
214	0	-	0	-	0	0	0	0	0	0
215	0	-	0	-	0	0	0	0	0	0
216	0	-	0	-	0	0	0	0	0	0
217	0	-	0	-	0	0	0	0	0	0
218	0	-	0	-	0	0	0	0	0	0
219	0	-	0	-	0	0	0	0	0	0
220	0	-	0	-	0	0	0	0	0	0
221	0	-	0	-	0	0	0	0	0	0
222	0	-	0	-	0	0	0	0	0	0
223	0	-	0	-	0	0	0	0	0	0
224	0	-	0	-	0	0	0	0	0	0
225	0	-	0	-	0	0	0	0	0	0
226	0	-	0	-	0	0	0	0	0	0
227	0	-	0	-	0	0	0	0	0	0
228	0	-	0	-	0	0	0	0	0	0
229	0	-	0	-	0	0	0	0	0	0
230	0	-	0	-	0	0	0	0	0	0
231	0	-	0	-	0	0	0	0	0	0
232	0	-	0	-	0	0	0	0	0	0
233	0	-	0	-	0	0	0	0	0	0
234	0	-	0	-	0	0	0	0	0	0
235	0	-	0	-	0	0	0	0	0	0
236	0	-	0	-	0	0	0	0	0	0
237	0	-	0	-	0	0	0	0	0	0
238	0	-	0	-	0	0	0	0	0	0
239	0	-	0	-	0	0	0	0	0	0
240	0	-	0	-	0	0	0	0	0	0
241	0	-	0	-	0	0	0	0	0	0
242	0	-	0	-	0	0	0	0	0	0
243	0	-	0	-	0	0	0	0	0	0
244	0	-	0	-	0	0	0	0	0	0
245	0	-	0	-	0	0	0	0	0	0
246	0	-	0	-	0	0	0	0	0	0
247	0	-	0	-	0	0	0	0	0	0
248	0	-	0	-	0	0	0	0	0	0
249	0	-	0	-	0	0	0	0	0	0
250	0	-	0	-	0	0	0	0	0	0
251	0	-	0	-	0	0	0	0	0	0
252	0	-	0	-	0	0	0	0	0	0
253	0	-	0	-	0	0	0	0	0	0
254	0	-	0	-	0	0	0	0	0	0
255	0	-	0	-	0	0	0	0	0	0
256	0	-	0	-	0	0	0	0	0	0
257	0	-	0	-	0	0	0	0	0	0
258	0	-	0	-	0	0	0	0	0	0
259	0	-	0	-	0	0	0	0	0	0
260	0	-	0	-	0	0	0	0	0	0
261	0	-	0	-	0	0	0	0	0	0
262	0	-	0	-	0	0	0	0	0	0
263	0	-	0	-	0	0	0	0	0	0
264	0	-	0	-	0	0	0	0	0	0
265	0	-	0	-	0	0	0	0	0	0
266	0	-	0	-	0	0	0	0	0	0
267	0	-	0	-	0	0	0	0	0	0
268	0	-	0	-	0	0	0	0	0	0
269	0	-	0	-	0	0	0	0	0	0
270	0	-	0	-	0	0	0	0	0	0
271	0	-	0	-	0	0	0	0	0	0
272	0	-	0	-	0	0	0	0	0	0
273	0	-	0	-	0	0	0	0	0	0
274	0	-	0	-	0	0	0	0	0	0
275	0	-	0	-	0	0	0	0	0	0
276	0	-	0	-	0	0	0	0	0	0
277	0	-	0	-	0	0	0	0	0	0
278	0	-	0	-	0	0	0	0	0	0
279	0	-	0	-	0	0	0	0	0	0
280	0	-	0	-	0	0	0	0	0	0
281	0	-	0	-	0	0	0	0	0	0
282	0	-	0	-	0	0	0	0	0	0
283	0	-	0	-	0	0	0	0	0	0
284	0	-	0	-	0	0	0	0	0	0
285	0	-	0	-	0	0	0	0	0	0
286	0	-	0	-	0	0	0	0	0	0
287	0	-	0	-	0	0	0	0	0	0
288	0	-	0	-	0	0	0	0	0	0
289	0	-	0	-	0	0	0	0	0	0
290	0	-	0	-	0	0	0	0	0	0
291	0	-	0	-	0	0	0	0	0	0
292	0	-	0	-	0	0	0	0	0	0
293	0	-	0	-	0	0	0	0	0	0
294	0	-	0	-	0	0	0	0	0	0
295	0	-	0	-	0	0	0	0	0	0
296	0	-	0	-	0	0	0	0	0	0
297	0	-	0	-	0	0	0	0	0	0
298	0	-	0	-	0	0	0	0	0	0
299	0	-	0	-	0	0	0	0	0	0
300	0	-	0	-	0	0	0	0	0	0
301	0	-	0	-	0	0	0	0	0	0
302	0	-	0	-	0	0	0	0	0	0
303	0	-	0	-	0	0	0	0	0	0
304	0	-	0	-	0	0	0	0	0	0
305	0	-	0	-	0	0	0	0	0	0
306	0	-	0	-	0	0	0	0	0	0
307	0	-	0	-	0	0	0	0	0	0
308	0	-	0	-	0	0	0	0	0	0
309	0	-	0	-	0	0	0	0	0	0
310	0	-	0	-	0	0	0	0	0	0
311	0	-	0	-	0	0	0	0	0	0
312	0	-	0	-	0	0	0	0	0	0
313	0	-	0	-	0	0	0	0	0	0
314	0	-	0	-	0	0	0	0	0	0
315	0	-	0	-	0	0	0	0	0	0
316	0	-	0	-	0	0	0	0	0	0
317	0	-	0	-	0	0	0	0	0	0
318	0	-	0	-	0	0	0	0	0	0
319	0	-	0	-	0	0	0	0	0	0
320	0	-	0	-	0	0	0	0	0	0
321	0	-	0	-	0	0	0	0	0	0
322	0	-	0	-	0	0	0	0	0	0
323	0	-	0	-	0	0	0	0	0	0
324	0	-	0	-	0	0	0	0	0	0
325	0	-	0	-	0	0	0	0	0	0
326	0	-	0	-	0	0	0	0	0	0
327	0	-	0	-	0	0	0	0	0	0
328	0	-	0	-	0	0	0	0	0	0
329	0	-	0	-	0	0	0	0	0	0
330	0	-	0	-	0	0	0	0	0	0
331	0	-	0	-	0	0	0	0	0	0
332	0	-	0	-	0	0	0	0	0	0
333	0	-	0	-	0	0	0	0	0	0
334	0	-	0	-	0	0	0	0	0	0
335	0	-	0	-	0	0	0	0	0	0
336	0	-	0	-	0	0	0	0	0	0
337	0	-	0	-	0	0	0	0	0	0
338	0	-	0	-	0	0	0	0	0	0
339	0	-	0	-	0	0	0	0	0	0
340	0	-	0	-	0	0	0	0	0	0
341	0	-	0	-	0	0	0	0	0	0
342	0	-	0	-	0	0	0	0	0	0
343	0	-	0	-	0	0	0	0	0	0
344	0	-	0	-	0	0	0	0	0	0
345	0	-	0	-	0	0	0	0	0	0
346	0	-	0	-	0	0	0	0	0	0
347	0	-	0	-	0	0	0	0	0	0
348	0	-	0	-	0	0	0	0	0	0
349	0	-	0	-	0	0	0	0	0	0
350	0	-	0	-	0	0	0	0	0	0
351	0	-	0	-	0	0	0	0	0	0
352	0	-	0	-	0	0	0	0	0	0
353	0	-	0	-	0	0	0	0	0	0
354	0	-	0	-	0	0	0	0	0	0
355	0	-	0	-	0	0	0	0	0	0
356	0	-	0	-	0	0	0	0	0	0
357	0	-	0	-	0	0	0	0	0	0
358	0	-	0	-	0	0	0	0	0	0
359	0	-	0	-	0	0	0	0	0	0
360	0	-	0	-	0	0	0	0	0	0
361	0	-	0	-	0	0	0	0	0	0
362	0	-	0	-	0	0	0	0	0	0
363	0	-	0	-	0	0	0	0	0	0
364	0	-	0	-	0	0	0	0	0	0
365	0	-	0	-	0	0	0	0	0	0
366	0	-	0	-	0	0	0	0	0	0
367	0	-	0	-	0	0	0	0	0	0
368	0	-	0	-	0	0	0	0	0	0
369	0	-	0	-	0	0	0	0	0	0
370	0	-	0	-	0	0	0	0	0	0
371	0	-	0	-	0	0	0	0	0	0
372	0	-	0	-	0	0	0	0	0	0
373	0	-	0	-	0	0	0	0	0	0
374	0	-	0	-	0	0	0	0	0	0
375	0	-	0	-	0	0	0	0	0	0
376	0	-	0	-	0	0	0	0	0	0
377	0	-	0	-	0	0	0	0	0	0
378	0	-	0	-	0	0	0	0	0	0
379	0	-	0	-	0	0	0	0	0	0
380	0	-	0	-	0	0	0	0	0	0
381	0	-	0	-	0	0	0	0	0	0
382	0	-	0	-	0	0	0	0	0	0
383	0	-	0	-	0	0	0	0	0	0
384	0	-	0	-	0	0	0	0	0	0
385	0	-	0	-	0	0	0	0	0	0
386	0	-	0	-	0	0	0	0	0	0
387	0	-	0	-	0	0	0	0	0	0
388	0	-	0	-	0	0	0	0	0	0
389	0	-	0	-	0	0	0	0	0	0
390	0	-	0	-	0	0	0	0	0	0
391	0	-	0	-	0	0	0	0	0	0
392	0	-	0	-	0	0	0	0	0	0
393	0	-	0	-	0	0	0	0	0	0
394	0	-	0	-	0	0	0	0	0	0
395	0	-	0	-	0	0	0	0	0	0
396	0	-	0	-	0	0	0	0	0	0
397	0	-	0	-	0	0	0	0	0	0
398	0	-	0	-	0	0	0	0	0	0
399	0	-	0	-	0	0	0	0	0	0
400	0	-	0	-	0	0	0	0	0	0
401	0	-	0	-	0	0	0	0	0	0
402	0	-	0	-	0	0	0	0	0	0
403	0	-	0	-	0	0	0	0	0	0
404	0	-	0	-	0	0	0	0	0	0
405	0	-	0	-	0	0	0	0	0	0
406	0	-	0	-	0	0	0	0	0	0
407	0	-	0	-	0	0	0	0	0	0
408	0	-	0	-	0	0	0	0	0	0
409	0	-	0	-	0	0	0	0	0	0
410	0	-	0	-	0	0	0	0	0	0
411	0	-	0	-	0	0	0	0	0	0
412	0	-	0	-	0	0	0	0	0	0
413	0	-	0	-	0	0	0	0	0	0
414	0	-	0	-	0	0	0	0	0	0
415	0	-	0	-	0	0	0	0	0	0
416	0	-	0	-	0	0	0	0	0	0
417	0	-	0	-	0	0	0	0	0	0
418	0	-	0	-	0	0	0	0	0	0
419	0	-	0	-	0	0	0	0	0	0
420	0	-	0	-	0	0	0	0	0	0
421	0	-	0	-	0	0	0	0	0	0
422	0	-	0	-	0	0	0	0	0	0
423	0	-	0	-	0	0	0	0	0	0
424	0	-	0	-	0	0	0	0	0	0
425	0	-	0	-	0	0	0	0	0	0
426	0	-	0	-	0	0	0	0	0	0
427	0	-	0	-	0	0	0	0	0	0
428	0	-	0	-	0	0	0	0	0	0
429	0	-	0	-	0	0	0	0	0	0
430	0	-	0	-	0	0	0	0	0	0
431	0	-	0	-	0	0	0	0	0	0
432	0	-	0	-	0	0	0	0	0	0
433	0	-	0	-	0	0	0	0	0	0
434	0	-	0	-	0	0	0	0	0	0
435	0	-	0	-	0	0	0	0	0	0
436	0	-	0	-	0	0	0	0	0	0
437	0	-	0	-	0	0	0	0	0	0
438	0	-	0	-	0	0	0	0	0	0
439	0	-	0	-	0	0	0	0	0	0
440	0	-	0	-	0	0	0	0	0	0
441	0	-	0	-	0	0	0	0	0	0
442	0	-	0	-	0	0	0	0	0	0
443	0	-	0	-	0	0	0	0	0	0
444	0	-	0	-	0	0	0	0	0	0
445	0	-	0	-	0	0	0	0	0	0
446	0	-	0	-	0	0	0	0	0	0
447	0	-	0	-	0	0	0	0	0	0
448	0	-	0	-	0	0	0	0	0	0
449	0	-	0	-	0	0	0	0	0	0
450	0	-	0	-	0	0	0	0	0	0
451	0	-	0	-	0	0	0	0	0	0
452	0	-	0	-	0	0	0	0	0	0
453	0	-	0	-	0	0	0	0	0	0
454	0	-	0	-	0	0	0	0	0	0
455	0	-	0	-	0	0	0	0	0	0
456	0	-	0	-	0	0	0	0	0	0
457	0	-	0	-	0	0	0	0	0	0
458	0	-	0	-	0	0	0	0	0	0
459	0	-	0	-	0	0	0	0	0	0
460	0	-	0	-	0	0	0	0	0	0
461	0	-	0	-	0	0	0	0	0	0
462	0	-	0	-	0	0	0	0	0	0
463	0	-	0	-	0	0	0	0	0	0
464	0	-	0	-	0	0	0	0	0	0
465	0	-	0	-	0	0	0	0	0	0
466	0	-	0	-	0	0	0	0	0	0
467	0	-	0	-	0	0	0	0	0	0
468	0	-	0	-	0	0	0	0	0	0
469	0	-	0	-	0	0	0	0	0	0
470	0	-	0	-	0	0	0	0	0	0
471	0	-	0	-	0	0	0	0	0	0
472	0	-	0	-	0	0	0	0	0	0
473	0	-	0	-	0	0	0	0	0	0
474	0	-	0	-	0	0	0	0	0	0
475	0	-	0	-	0	0	0	0	0	0
476	0	-	0	-	0	0	0	0	0	0
477	0	-	0	-	0	0	0	0	0	0
478	0	-	0	-	0	0	0	0	0	0
479	0	-	0	-	0	0	0	0	0	0
480	0	-	0	-	0	0	0	0	0	0
481	0	-	0	-	0	0	0	0	0	0
482	0	-	0	-	0	0	0	0	0	0
483	0	-	0	-	0	0	0	0	0	0
484	0	-	0	-	0	0	0	0	0	0
485	0	-	0	-	0	0	0	0	0	0
486	0	-	0	-	0	0	0	0	0	0
487	0	-	0	-	0	0	0	0	0	0
488	0	-	0	-	0	0	0	0	0	0
489	0	-	0	-	0	0	0	0	0	0
490	0	-	0	-	0	0	0	0	0	0
491	0	-	0	-	0	0	0	0	0	0
492	0	-	0	-	0	0	0	0	0	0
493	0	-	0	-	0	0	0	0	0	0
494	0	-	0	-	0	0	0	0	0	0
495	0	-	0	-	0	0	0	0	0	0
496	0	-	0	-	0	0	0	0	0	0
497	0	-	0	-	0	0	0	0	0	0
498	0	-	0	-	0	0	0	0	0	0
499	0	-	0	-	0	0	0	0	0	0
500	0	-	0	-	0	0	0	0	0	0
501	0	-	0	-	0	0	0	0	0	0
502	0	-	0	-	0	0	0	0	0	0
503	0	-	0	-	0	0	0	0	0	0
504	0	-	0	-	0	0	0	0	0	0
505	0	-	0	-	0	0	0	0	0	0
506	0	-	0	-	0	0	0	0	0	0
507	0	-	0	-	0	0	0	0	0	0
508	0	-	0	-	0	0	0	0	0	0
509	0	-	0	-	0	0	0	0	0	0
510	0	-	0	-	0	0	0	0	0	0
511	0	-	0	-	0	0	0	0	0	0
512	0	-	0	-	0	0	0	0	0	0
513	0	-	0	-	0	0	0	0	0	0
514	0	-	0	-	0	0	0	0	0	0
515	0	-	0	-	0	0	0	0	0	0
516	0	-	0	-	0	0	0	0	0	0
517	0	-	0	-	0	0	0	0	0	0
518	0	-	0	-	0	0	0	0	0	0
519	0	-	0	-	0	0	0	0	0	0
520	0	-	0	-	0	0	0	0	0	0
521	0	-	0	-	0	0	0	0	0	0
522	0	-	0	-	0	0	0	0	0	0
523	0	-	0	-	0	0	0	0	0	0
524	0	-	0	-	0	0	0	0	0	0
525	0	-	0	-	0	0	0	0	0	0
526	0	-	0	-	0	0	0	0	0	0
527	0	-	0	-	0	0	0	0	0	0
528	0	-	0	-	0	0	0	0	0	0
529	0	-	0	-	0	0	0	0	0	0
530	0	-	0	-	0	0	0	0	0	0
531	0	-	0	-	0	0	0	0	0	0
532	0	-	0	-	0	0	0	0	0	0
533	0	-	0	-	0	0	0	0	0	0
534	0	-	0	-	0	0	0	0	0	0
535	0	-	0	-	0	0	0	0	0	0
536	0	-	0	-	0	0	0	0	0	0
537	0	-	0	-	0	0	0	0	0	0
538	0	-	0	-	0	0	0	0	0	0
539	0	-	0	-	0	0	0	0	0	0
540	0	-	0	-	0	0	0	0	0	0
541	0	-	0	-	0	0	0	0	0	0
542	0	-	0	-	0	0	0	0	0	0
543	0	-	0	-	0	0	0	0	0	0
544	0	-	0	-	0	0	0	0	0	0
545	0	-	0	-	0	0	0	0	0	0
546	0	-	0	-	0	0	0	0	0	0
547	0	-	0	-	0	0	0	0	0	0
548	0	-	0	-	0	0	0	0	0	0
549	0	-	0	-	0	0	0	0	0	0
550	0	-	0	-	0	0	0	0	0	0
551	0	-	0	-	0	0	0	0	0	0
552	0	-	0	-	0	0	0	0	0	0
553	0	-	0	-	0	0	0	0	0	0
554	0	-	0	-	0	0	0	0	0	0
555	0	-	0	-	0	0	0	0	0	0
556	0	-	0	-	0	0	0	0	0	0
557	0	-	0	-	0	0	0	0	0	0
558	0	-	0	-	0	0	0	0	0	0
559	0	-	0	-	0	0	0	0	0	0
560	0	-	0	-	0	0	0	0	0	0
561	0	-	0	-	0	0	0	0	0	0
562	0	-	0	-	0	0	0	0	0	0
563	0	-	0	-	0	0	0	0	0	0
564	0	-	0	-	0	0	0	0	0	0
565	0	-	0	-	0	0	0	0	0	0
566	0	-	0	-	0	0	0	0	0	0
567	0	-	0	-	0	0	0	0	0	0
568	0	-	0	-	0	0	0	0	0	0
569	0	-	0	-	0	0	0	0	0	0
570	0	-	0	-	0	0	0	0	0	0
571	0	-	0	-	0	0	0	0	0	0
572	0	-	0	-	0	0	0	0	0	0
573	0	-	0	-	0	0	0	0	0	0
574	0	-	0	-	0	0	0	0	0	0
575	0	-	0	-	0	0	0	0	0	0
576	0	-	0	-	0	0	0	0	0	0
577	0	-	0	-	0	0	0	0	0	0
578	0	-	0	-	0	0	0	0	0	0
579	0	-	0	-	0	0	0	0	0	0
580	0	-	0	-	0	0	0	0	0	0
581	0	-	0	-	0	0	0	0	0	0
582	0	-	0	-	0	0	0	0	0	0
583	0	-	0	-	0	0	0	0	0	0
584	0	-	0	-	0	0	0	0	0	0
585	0	-	0	-	0	0	0	0	0	0
586	0	-	0	-	0	0	0	0	0	0
587	0	-	0	-	0	0	0	0	0	0
588	0	-	0	-	0	0	0	0	0	0
589	0	-	0	-	0	0	0	0	0	0
590	0	-	0	-	0	0	0	0	0	0
591	0	-	0	-	0	0	0	0	0	0
592	0	-	0	-	0	0	0	0	0	0
593	0	-	0	-	0	0	0	0	0	0
594	0	-	0	-	0	0	0	0	0	0
595	0	-	0	-	0	0	0	0	0	0
596	0	-	0	-	0	0	0	0	0	0
597	0	-	0	-	0	0	0	0	0	0
598	0	-	0	-	0	0	0	0	0	0
599	0	-	0	-	0	0	0	0	0	0
600	0	-	0	-	0	0	0	0	0	0
601	0	-	0	-	0	0	0	0	0	0
602	0	-	0	-	0	0	0	0	0	0
603	0	-	0	-	0	0	0	0	0	0
604	0	-	0	-	0	0	0	0	0	0
605	0	-	0	-	0	0	0	0	0	0
606	0	-	0	-	0	0	0	0	0	0
607	0	-	0	-	0	0	0	0	0	0
608	0	-	0	-	0	0	0	0	0	0
609	0	-	0	-	0	0	0	0	0	0
610	0	-	0	-	0	0	0	0	0	0
611	0	-	0	-	0	0	0	0	0	0
612	0	-	0	-	0	0	0	0	0	0
613	0	-	0	-	0	0	0	0	0	0
614	0	-	0	-	0	0	0	0	0	0
615	0	-	0	-	0	0	0	0	0	0
616	0	-	0	-	0	0	0	0	0	0
617	0	-	0	-	0	0	0	0	0	0
618	0	-	0	-	0	0	0	0	0	0
619	0	-	0	-	0	0	0	0	0	0
620	0	-	0	-	0	0	0	0	0	0
621	0	-	0	-	0	0	0	0	0	0
622	0	-	0	-	0	0	0	0	0	0
623	0	-	0	-	0	0	0	0	0	0
624	0	-	0	-	0	0	0	0	0	0
625	0	-	0	-	0	0	0	0	0	0
626	0	-	0	-	0	0	0	0	0	0
627	0	-	0	-	0	0	0	0	0	0
628	0	-	0	-	0	0	0	0	0	0
629	0	-	0	-	0	0	0	0	0	0
630	0	-	0	-	0	0	0	0	0	0
631	0	-	0	-	0	0	0	0	0	0
632	0	-	0	-	0	0	0	0	0	0
633	0	-	0	-	0	0	0	0	0	0
634	0	-	0	-	0	0	0	0	0	0
635	0	-	0	-	0	0	0	0	0	0
636	0	-	0	-	0	0	0	0	0	0
637	0	-	0	-	0	0	0	0	0	0
638	0	-	0	-	0	0	0	0	0	0
639	0	-	0	-	0	0	0	0	0	0
640	0	-	0	-	0	0	0	0	0	0
641	0	-	0	-	0	0	0	0	0	0
642	0	-	0	-	0	0	0	0	0	0
643	0	-	0	-	0	0	0	0	0	0
644	0	-	0	-	0	0	0	0	0	0
645	0	-	0	-	0	0	0	0	0	0
646	0	-	0	-	0	0	0	0	0	0
647	0	-	0	-	0	0	0	0	0	0
648	0	-	0	-	0	0	0	0	0	0
649	0	-	0	-	0	0	0	0	0	0
650	0	-	0	-	0	0	0	0	0	0
651	0	-	0	-	0	0	0	0	0	0
652	0	-	0	-	0	0	0	0	0	0
653	0	-	0	-	0	0	0	0	0	0
654	0	-	0	-	0	0	0	0	0	0
655	0	-	0	-	0	0	0	0	0	0
656	0	-	0	-	0	0	0	0	0	0
657	0	-	0	-	0	0	0	0	0	0
658	0	-	0	-	0	0	0	0	0	0
659	0	-	0	-	0	0	0	0	0	0
660	0	-	0	-	0	0	0	0	0	0
661	0	-	0	-	0	0	0	0	0	0
662	0	-	0	-	0	0	0	0	0	0
663	0	-	0	-	0	0	0	0	0	0
664	0	-	0	-	0	0	0	0	0	0
665	0	-	0	-	0	0	0	0	0	0
666	0	-	0	-	0	0	0	0	0	0
667	0	-	0	-	0	0	0	0	0	0
668	0	-	0	-	0	0	0	0	0	0
669	0	-	0	-	0	0	0	0	0	0
670	0	-	0	-	0	0	0	0	0	0
671	0	-	0	-	0	0	0	0	0	0
672	0	-	0	-	0	0	0	0	0	0
673	0	-	0	-	0	0	0	0	0	0
674	0	-	0	-	0	0	0	0	0	0
675	0	-	0	-	0	0	0	0	0	0
676	0	-	0	-	0	0	0	0	0	0
677	0	-	0	-	0	0	0	0	0	0
678	0	-	0	-	0	0	0	0	0	0
679	0	-	0	-	0	0	0	0	0	0
680	0	-	0	-	0	0	0	0	0	0
681	0	-	0	-	0	0	0	0	0	0
682	0	-	0	-	0	0	0	0	0	0
683	0	-	0	-	0	0	0	0	0	0
684	0	-	0	-	0	0	0	0	0	0
685	0	-	0	-	0	0	0	0	0	0
686	0	-	0	-	0	0	0	0	0	0
687	0	-	0	-	0	0	0	0	0	0
688	0	-	0	-	0	0	0	0	0	0
689	0	-	0	-	0	0	0	0	0	0
690	0	-	0	-	0	0	0	0	0	0
691	0	-	0	-	0	0	0	0	0	0
692	0	-	0	-	0	0	0	0	0	0
693	0	-	0	-	0	0	0	0	0	0
694	0	-	0	-	0	0	0	0	0	0
695	0	-	0	-	0	0	0	0	0	0
696	0	-	0	-	0	0	0	0	0	0
697	0	-	0	-	0	0	0	0	0	0
698	0	-	0	-	0	0	0	0	0	0
699	0	-	0	-	0	0	0	0	0	0
700	0	-	0	-	0	0	0	0	0	0
701	0	-	0	-	0	0	0	0	0	0
702	0	-	0	-	0	0	0	0	0	0
703	0	-	0	-	0	0	0	0	0	0
704	0	-	0	-	0	0	0	0	0	0
705	0	-	0	-	0	0	0	0	0	0
706	0	-	0	-	0	0	0	0	0	0
707	0	-	0	-	0	0	0	0	0	0
708	0	-	0	-	0	0	0	0	0	0
709	0	-	0	-	0	0	0	0	0	0
710	0	-	0	-	0	0	0	0	0	0
711	0	-	0	-	0	0	0	0	0	0
712	0	-	0	-	0	0	0	0	0	0
713	0	-	0	-	0	0	0	0	0	0
714	0	-	0	-	0	0	0	0	0	0
715	0	-	0	-	0	0	0	0	0	0
716	0	-	0	-	0	0	0	0	0	0
717	0	-	0	-	0	0	0	0	0	0
718	0	-	0	-	0	0	0	0	0	0
719	0	-	0	-	0	0	0	0	0	0
720	0	-	0	-	0	0	0	0	0	0
721	0	-	0	-	0	0	0	0	0	0
722	0	-	0	-	0	0	0	0	0	0
723	0	-	0	-	0	0	0	0	0	0
724	0	-	0	-	0	0	0	0	0	0
725	0	-	0	-	0	0	0	0	0	0
726	0	-	0	-	0	0	0	0	0	0
727	0	-	0	-	0	0	0	0	0	0
728	0	-	0	-	0	0	0	0	0	0
729	0	-	0	-	0	0	0	0	0	0
730	0	-	0	-	0	0	0	0	0	0
731	0	-	0	-	0	0	0	0	0	0
732	0	-	0	-	0	0	0	0	0	0
733	0	-	0	-	0	0	0	0	0	0
734	0	-	0	-	0	0	0	0	0	0
735	0	-	0	-	0	0	0	0	0	0
736	0	-	0	-	0	0	0	0	0	0
737	0	-	0	-	0	0	0	0	0	0
738	0	-	0	-	0	0	0	0	0	0
739	0	-	0	-	0	0	0	0	0	0
740	0	-	0	-	0	0	0	0	0	0
741	0	-	0	-	0	0	0	0	0	0
742	0	-	0	-	0	0	0	0	0	0
743	0	-	0	-	0	0	0	0	0	0
744	0	-	0	-	0	0	0	0	0	0
745	0	-	0	-	0	0	0	0	0	0
746	0	-	0	-	0	0	0	0	0	0
747	0	-	0	-	0	0	0	0	0	0
748	0	-	0	-	0	0	0	0	0	0
749	0	-	0	-	0	0	0	0	0	0
750	0	-	0	-	0	0	0	0	0	0
751	0	-	0	-	0	0	0	0	0	0
752	0	-	0	-	0	0	0	0	0	0
753	0	-	0	-	0	0	0	0	0	0
754	0	-	0	-	0	0	0	0	0	0
755	0	-	0	-	0	0	0	0	0	0
756	0	-	0	-	0	0	0	0	0	0
757	0	-	0	-	0	0	0	0	0	0
758	0	-	0	-	0	0	0	0	0	0
759	0	-	0	-	0	0	0	0	0	0
760	0	-	0	-	0	0	0	0	0	0
761	0	-	0	-	0	0	0	0	0	0
762	0	-	0	-	0	0	0	0	0	0
763	0	-	0	-	0	0	0	0	0	0
764	0	-	0	-	0	0	0	0	0	0
765	0	-	0	-	0	0	0	0	0	0
766	0	-	0	-	0	0	0	0	0	0
767	0	-	0	-	0	0	0	0	0	0
768	0	-	0	-	0	0	0	0	0	0
769	0	-	0	-	0	0	0	0	0	0
770	0	-	0	-	0	0	0	0	0	0
771	0	-	0	-	0	0	0	0	0	0
772	0	-	0	-	0	0	0	0	0	0
773	0	-	0	-	0	0	0	0	0	0
774	0	-	0	-	0	0	0	0	0	0
775	0	-	0	-	0	0	0	0	0	0
776	0	-	0	-	0	0	0	0	0	0
777	0	-	0	-	0	0	0	0	0	0
778	0	-	0	-	0	0	0	0	0	0
779	0	-	0	-	0	0	0	0	0	0
780	0	-	0	-	0	0	0	0	0	0
781	0	-	0	-	0	0	0	0	0	0
782	0	-	0	-	0	0	0	0	0	0
783	0	-	0	-	0	0	0	0	0	0
784	0	-	0	-	0	0	0	0	0	0
785	0	-	0	-	0	0	0	0	0	0
786	0	-	0	-	0	0	0	0	0	0
787	0	-	0	-	0	0	0	0	0	0
788	0	-	0	-	0	0	0	0	0	0
789	0	-	0	-	0	0	0	0	0	0
790	0	-	0	-	0	0	0	0	0	0
791	0	-	0	-	0	0	0	0	0	0
792	0	-	0	-	0	0	0	0	0	0
793	0	-	0	-	0	0	0	0	0	0
794	0	-	0	-	0	0	0	0	0	0
795	0	-	0	-	0	0	0	0	0	0
796	0	-	0	-	0	0	0	0	0	0
797	0	-	0	-	0	0	0	0	0	0
798	0	-	0	-	0	0	0	0	0	0
799	0	-	0	-	0	0	0	0	0	0
800	0	-	0	-	0	0	0	0	0	0
801	0	-	0	-	0	0	0	0	0	0
802	0	-	0	-	0	0	0	0	0	0
803	0	-	0	-	0	0	0	0	0	0
804	0	-	0	-	0	0	0	0	0	0
805	0	-	0	-	0	0	0	0	0	0
806	0	-	0	-	0	0	0	0	0	0
807	0	-	0	-	0	0	0	0	0	0
808	0	-	0	-	0	0	0	0	0	0
809	0	-	0	-	0	0	0	0	0	0
810	0	-	0	-	0	0	0	0	0	0
811	0	-	0	-	0	0	0	0	0	0
812	0	-	0	-	0	0	0	0	0	0
813	0	-	0	-	0	0	0	0	0	0
814	0	-	0	-	0	0	0	0	0	0
815	0	-	0	-	0	0	0	0	0	0
816	0	-	0	-	0	0	0	0	0	0
817	0	-	0	-	0	0	0	0	0	0
818	0	-	0	-	0	0	0	0	0	0
819	0	-	0	-	0	0	0	0	0	0
820	0	-	0	-	0	0	0	0	0	0
821	0	-	0	-	0	0	0	0	0	0
822	0	-	0	-	0	0	0	0	0	0
823	0	-	0	-	0	0	0	0	0	0
824	0	-	0	-	0	0	0	0	0	0
825	0	-	0	-	0	0	0	0	0	0
826	0	-	0	-	0	0	0	0	0	0
827	0	-	0	-	0	0	0	0	0	0
828	0	-	0	-	0	0	0	0	0	0
829	0	-	0	-	0	0	0	0	0	0
830	0	-	0	-	0	0	0	0	0	0
831	0	-	0	-	0	0	0	0	0	0
832	0	-	0	-	0	0	0	0	0	0
833	0	-	0	-	0	0	0	0	0	0
834	0	-	0	-	0	0	0	0	0	0
835	0	-	0	-	0	0	0	0	0	0
836	0	-	0	-	0	0	0	0	0	0
837	0	-	0	-	0	0	0	0	0	0
838	0	-	0	-	0	0	0	0	0	0
839	0	-	0	-	0	0	0	0	0	0
840	1	A	1	-	0	0	1	0	0	0
841	1	A	1	-	0	0	1	0	0	0
842	1	C	1	-	0	0	0	1	0	0
843	1	G	1	-	0	0	0	0	1	0
844	1	A	1	-	0	0	1	0	0	0
845	1	A	1	-	0	0	1	0	0	0
846	1	A	1	-	0	0	1	0	0	0
847	1	G	1	-	0	0	0	0	1	0
848	1	T	1	-	0	0	0	0	0	1
849	1	T	1	-	0	0	0	0	0	1
850	1	T	1	-	0	0	0	0	0	1
851	1	A	1	-	0	0	1	0	0	0
852	1	A	1	-	0	0	1	0	0	0
853	1	C	1	-	0	0	0	1	0	0
854	1	T	1	-	0	0	0	0	0	1
855	1	A	1	-	0	0	1	0	0	0
856	1	A	1	-	0	0	1	0	0	0
857	1	G	1	-	0	0	0	0	1	0
858	1	C	1	-	0	0	0	1	0	0
859	1	T	1	-	0	0	0	0	0	1
860	1	A	1	-	0	0	1	0	0	0
861	1	T	1	-	0	0	0	0	0	1
862	1	A	1	-	0	0	1	0	0	0
863	1	C	1	-	0	0	0	1	0	0
864	1	T	1	-	0	0	0	0	0	1
865	1	A	1	-	0	0	1	0	0	0
866	1	A	1	-	0	0	1	0	0	0
867	1	C	1	-	0	0	0	1	0	0
868	1	C	1	-	0	0	0	1	0	0
869	1	C	1	-	0	0	0	1	0	0
870	1	C	1	-	0	0	0	1	0	0
871	1	A	1	-	0	0	1	0	0	0
872	1	G	1	-	0	0	0	0	1	0
873	1	G	1	-	0	0	0	0	1	0
874	1	G	1	-	0	0	0	0	1	0
875	1	T	1	-	0	0	0	0	0	1
876	1	T	1	-	0	0	0	0	0	1
877	1	G	1	-	0	0	0	0	1	0
878	1	G	1	-	0	0	0	0	1	0
879	1	T	1	-	0	0	0	0	0	1
880	1	C	1	-	0	0	0	1	0	0
881	1	A	1	-	0	0	1	0	0	0
882	1	A	1	-	0	0	1	0	0	0
883	1	T	1	-	0	0	0	0	0	1
884	1	T	1	-	0	0	0	0	0	1
885	1	T	1	-	0	0	0	0	0	1
886	1	C	1	-	0	0	0	1	0	0
887	1	G	1	-	0	0	0	0	1	0
888	1	T	1	-	0	0	0	0	0	1
889	1	G	1	-	0	0	0	0	1	0
890	1	C	1	-	0	0	0	1	0	0
891	1	C	1	-	0	0	0	1	0	0
892	1	A	1	-	0	0	1	0	0	0
893	1	G	1	-	0	0	0	0	1	0
894	1	C	1	-	0	0	0	1	0	0
895	1	C	1	-	0	0	0	1	0	0
896	1	A	1	-	0	0	1	0	0	0
897	1	C	1	-	0	0	0	1	0	0
898	1	C	1	-	0	0	0	1	0	0
899	1	G	1	-	0	0	0	0	1	0
900	1	C	1	-	0	0	0	1	0	0
901	1	G	1	-	0	0	0	0	1	0
902	1	G	1	-	0	0	0	0	1	0
903	1	T	1	-	0	0	0	0	0	1
904	1	C	1	-	0	0	0	1	0	0
905	1	A	1	-	0	0	1	0	0	0
906	1	C	1	-	0	0	0	1	0	0
907	1	A	1	-	0	0	1	0	0	0
908	1	C	1	-	0	0	0	1	0	0
909	1	G	1	-	0	0	0	0	1	0
910	1	A	1	-	0	0	1	0	0	0
911	1	T	1	-	0	0	0	0	0	1
912	1	T	1	-	0	0	0	0	0	1
913	1	A	1	-	0	0	1	0	0	0
914	1	A	1	-	0	0	1	0	0	0
915	1	C	1	-	0	0	0	1	0	0
916	1	C	1	-	0	0	0	1	0	0
917	1	C	1	-	0	0	0	1	0	0
918	1	A	1	-	0	0	1	0	0	0
919	1	A	1	-	0	0	1	0	0	0
920	1	G	1	-	0	0	0	0	1	0
921	1	T	1	-	0	0	0	0	0	1
922	1	C	1	-	0	0	0	1	0	0
923	1	A	1	-	0	0	1	0	0	0
924	1	A	1	-	0	0	1	0	0	0
925	1	T	1	-	0	0	0	0	0	1
926	1	A	1	-	0	0	1	0	0	0
927	1	G	1	-	0	0	0	0	1	0
928	1	A	1	-	0	0	1	0	0	0
929	1	A	1	-	0	0	1	0	0	0
930	1	G	1	-	0	0	0	0	1	0
931	1	C	1	-	0	0	0	1	0	0
932	1	C	1	-	0	0	0	1	0	0
933	1	G	1	-	0	0	0	0	1	0
934	1	G	1	-	0	0	0	0	1	0
935	1	C	1	-	0	0	0	1	0	0
936	1	G	1	-	0	0	0	0	1	0
937	1	T	1	-	0	0	0	0	0	1
938	1	A	1	-	0	0	1	0	0	0
939	1	A	1	-	0	0	1	0	0	0
940	1	A	1	-	0	0	1	0	0	0
941	1	G	1	-	0	0	0	0	1	0
942	1	A	1	-	0	0	1	0	0	0
943	1	G	1	-	0	0	0	0	1	0
944	1	T	1	-	0	0	0	0	0	1
945	1	G	1	-	0	0	0	0	1	0
946	1	T	1	-	0	0	0	0	0	1
947	1	T	1	-	0	0	0	0	0	1
948	1	T	1	-	0	0	0	0	0	1
949	1	T	1	-	0	0	0	0	0	1
950	1	A	1	-	0	0	1	0	0	0
951	1	G	1	-	0	0	0	0	1	0
952	1	A	1	-	0	0	1	0	0	0
953	1	T	1	-	0	0	0	0	0	1
954	1	C	1	-	0	0	0	1	0	0
955	1	A	1	-	0	0	1	0	0	0
956	1	C	1	-	0	0	0	1	0	0
957	1	C	1	-	0	0	0	1	0	0
958	1	C	1	-	0	0	0	1	0	0
959	1	C	1	-	0	0	0	1	0	0
960	0	-	0	-	0	0	0	0	0	0
961	0	-	0	-	0	0	0	0	0	0
962	0	-	0	-	0	0	0	0	0	0
963	0	-	0	-	0	0	0	0	0	0
964	0	-	0	-	0	0	0	0	0	0
965	0	-	0	-	0	0	0	0	0	0
966	0	-	0	-	0	0	0	0	0	0
967	0	-	0	-	0	0	0	0	0	0
968	0	-	0	-	0	0	0	0	0	0
969	0	-	0	-	0	0	0	0	0	0
970	0	-	0	-	0	0	0	0	0	0
971	0	-	0	-	0	0	0	0	0	0
972	0	-	0	-	0	0	0	0	0	0
973	0	-	0	-	0	0	0	0	0	0
974	0	-	0	-	0	0	0	0	0	0
975	0	-	0	-	0	0	0	0	0	0
976	0	-	0	-	0	0	0	0	0	0
977	0	-	0	-	0	0	0	0	0	0
978	0	-	0	-	0	0	0	0	0	0
979	0	-	0	-	0	0	0	0	0	0
980	0	-	0	-	0	0	0	0	0	0
981	0	-	0	-	0	0	0	0	0	0
982	0	-	0	-	0	0	0	0	0	0
983	0	-	0	-	0	0	0	0	0	0
984	0	-	0	-	0	0	0	0	0	0
985	0	-	0	-	0	0	0	0	0	0
986	0	-	0	-	0	0	0	0	0	0
987	0	-	0	-	0	0	0	0	0	0
988	0	-	0	-	0	0	0	0	0	0
989	0	-	0	-	0	0	0	0	0	0
990	0	-	0	-	0	0	0	0	0	0
991	0	-	0	-	0	0	0	0	0	0
992	0	-	0	-	0	0	0	0	0	0
993	0	-	0	-	0	0	0	0	0	0
994	0	-	0	-	0	0	0	0	0	0
995	0	-	0	-	0	0	0	0	0	0
996	0	-	0	-	0	0	0	0	0	0
997	0	-	0	-	0	0	0	0	0	0
998	0	-	0	-	0	0	0	0	0	0
999	0	-	0	-	0	0	0	0	0	0
1000	0	-	0	-	0	0	0	0	0	0
1001	0	-	0	-	0	0	0	0	0	0
1002	0	-	0	-	0	0	0	0	0	0
1003	0	-	0	-	0	0	0	0	0	0
1004	0	-	0	-	0	0	0	0	0	0
1005	0	-	0	-	0	0	0	0	0	0
1006	0	-	0	-	0	0	0	0	0	0
1007	0	-	0	-	0	0	0	0	0	0
1008	0	-	0	-	0	0	0	0	0	0
1009	0	-	0	-	0	0	0	0	0	0
1010	0	-	0	-	0	0	0	0	0	0
1011	0	-	0	-	0	0	0	0	0	0
1012	0	-	0	-	0	0	0	0	0	0
1013	0	-	0	-	0	0	0	0	0	0
1014	0	-	0	-	0	0	0	0	0	0
1015	0	-	0	-	0	0	0	0	0	0
1016	0	-	0	-	0	0	0	0	0	0
1017	0	-	0	-	0	0	0	0	0	0
1018	0	-	0	-	0	0	0	0	0	0
1019	0	-	0	-	0	0	0	0	0	0
1020	0	-	0	-	0	0	0	0	0	0
1021	0	-	0	-	0	0	0	0	0	0
1022	0	-	0	-	0	0	0	0	0	0
1023	0	-	0	-	0	0	0	0	0	0
1024	0	-	0	-	0	0	0	0	0	0
1025	0	-	0	-	0	0	0	0	0	0
1026	0	-	0	-	0	0	0	0	0	0
1027	0	-	0	-	0	0	0	0	0	0
1028	0	-	0	-	0	0	0	0	0	0
1029	0	-	0	-	0	0	0	0	0	0
1030	0	-	0	-	0	0	0	0	0	0
1031	0	-	0	-	0	0	0	0	0	0
1032	0	-	0	-	0	0	0	0	0	0
1033	0	-	0	-	0	0	0	0	0	0
1034	0	-	0	-	0	0	0	0	0	0
1035	0	-	0	-	0	0	0	0	0	0
1036	0	-	0	-	0	0	0	0	0	0
1037	0	-	0	-	0	0	0	0	0	0
1038	0	-	0	-	0	0	0	0	0	0
1039	0	-	0	-	0	0	0	0	0	0
1040	0	-	0	-	0	0	0	0	0	0
1041	0	-	0	-	0	0	0	0	0	0
1042	0	-	0	-	0	0	0	0	0	0
1043	0	-	0	-	0	0	0	0	0	0
1044	0	-	0	-	0	0	0	0	0	0
1045	0	-	0	-	0	0	0	0	0	0
1046	0	-	0	-	0	0	0	0	0	0
1047	0	-	0	-	0	0	0	0	0	0
1048	0	-	0	-	0	0	0	0	0	0
1049	0	-	0	-	0	0	0	0	0	0
1050	0	-	0	-	0	0	0	0	0	0
1051	0	-	0	-	0	0	0	0	0	0
1052	0	-	0	-	0	0	0	0	0	0
1053	0	-	0	-	0	0	0	0	0	0
1054	0	-	0	-	0	0	0	0	0	0
1055	0	-	0	-	0	0	0	0	0	0
1056	0	-	0	-	0	0	0	0	0	0
1057	0	-	0	-	0	0	0	0	0	0
1058	0	-	0	-	0	0	0	0	0	0
1059	0	-	0	-	0	0	0	0	0	0
1060	0	-	0	-	0	0	0	0	0	0
1061	0	-	0	-	0	0	0	0	0	0
1062	0	-	0	-	0	0	0	0	0	0
1063	0	-	0	-	0	0	0	0	0	0
1064	0	-	0	-	0	0	0	0	0	0
1065	0	-	0	-	0	0	0	0	0	0
1066	0	-	0	-	0	0	0	0	0	0
1067	0	-	0	-	0	0	0	0	0	0
1068	0	-	0	-	0	0	0	0	0	0
1069	0	-	0	-	0	0	0	0	0	0
1070	0	-	0	-	0	0	0	0	0	0
1071	0	-	0	-	0	0	0	0	0	0
1072	0	-	0	-	0	0	0	0	0	0
1073	0	-	0	-	0	0	0	0	0	0
1074	0	-	0	-	0	0	0	0	0	0
1075	0	-	0	-	0	0	0	0	0	0
1076	0	-	0	-	0	0	0	0	0	0
1077	0	-	0	-	0	0	0	0	0	0
1078	0	-	0	-	0	0	0	0	0	0
1079	0	-	0	-	0	0	0	0	0	0
1080	0	-	0	-	0	0	0	0	0	0
1081	0	-	0	-	0	0	0	0	0	0
1082	0	-	0	-	0	0	0	0	0	0
1083	0	-	0	-	0	0	0	0	0	0
1084	0	-	0	-	0	0	0	0	0	0
1085	0	-	0	-	0	0	0	0	0	0
1086	0	-	0	-	0	0	0	0	0	0
1087	0	-	0	-	0	0	0	0	0	0
1088	0	-	0	-	0	0	0	0	0	0
1089	0	-	0	-	0	0	0	0	0	0
1090	0	-	0	-	0	0	0	0	0	0
1091	0	-	0	-	0	0	0	0	0	0
1092	0	-	0	-	0	0	0	0	0	0
1093	0	-	0	-	0	0	0	0	0	0
1094	0	-	0	-	0	0	0	0	0	0
1095	0	-	0	-	0	0	0	0	0	0
1096	0	-	0	-	0	0	0	0	0	0
1097	0	-	0	-	0	0	0	0	0	0
1098	0	-	0	-	0	0	0	0	0	0
1099	0	-	0	-	0	0	0	0	0	0
1100	0	-	0	-	0	0	0	0	0	0
1101	0	-	0	-	0	0	0	0	0	0
1102	0	-	0	-	0	0	0	0	0	0
1103	0	-	0	-	0	0	0	0	0	0
1104	0	-	0	-	0	0	0	0	0	0
1105	0	-	0	-	0	0	0	0	0	0
1106	0	-	0	-	0	0	0	0	0	0
1107	0	-	0	-	0	0	0	0	0	0
1108	0	-	0	-	0	0	0	0	0	0
1109	0	-	0	-	0	0	0	0	0	0
1110	0	-	0	-	0	0	0	0	0	0
1111	0	-	0	-	0	0	0	0	0	0
1112	0	-	0	-	0	0	0	0	0	0
1113	0	-	0	-	0	0	0	0	0	0
1114	0	-	0	-	0	0	0	0	0	0
1115	0	-	0	-	0	0	0	0	0	0
1116	0	-	0	-	0	0	0	0	0	0
1117	0	-	0	-	0	0	0	0	0	0
1118	0	-	0	-	0	0	0	0	0	0
1119	0	-	0	-	0	0	0	0	0	0
1120	0	-	0	-	0	0	0	0	0	0
1121	0	-	0	-	0	0	0	0	0	0
1122	0	-	0	-	0	0	0	0	0	0
1123	0	-	0	-	0	0	0	0	0	0
1124	0	-	0	-	0	0	0	0	0	0
1125	0	-	0	-	0	0	0	0	0	0
1126	0	-	0	-	0	0	0	0	0	0
1127	0	-	0	-	0	0	0	0	0	0
1128	0	-	0	-	0	0	0	0	0	0
1129	0	-	0	-	0	0	0	0	0	0
1130	0	-	0	-	0	0	0	0	0	0
1131	0	-	0	-	0	0	0	0	0	0
1132	0	-	0	-	0	0	0	0	0	0
1133	0	-	0	-	0	0	0	0	0	0
1134	0	-	0	-	0	0	0	0	0	0
1135	0	-	0	-	0	0	0	0	0	0
1136	0	-	0	-	0	0	0	0	0	0
1137	0	-	0	-	0	0	0	0	0	0
1138	0	-	0	-	0	0	0	0	0	0
1139	0	-	0	-	0	0	0	0	0	0
1140	0	-	0	-	0	0	0	0	0	0
1141	0	-	0	-	0	0	0	0	0	0
1142	0	-	0	-	0	0	0	0	0	0
1143	0	-	0	-	0	0	0	0	0	0
1144	0	-	0	-	0	0	0	0	0	0
1145	0	-	0	-	0	0	0	0	0	0
1146	0	-	0	-	0	0	0	0	0	0
1147	0	-	0	-	0	0	0	0	0	0
1148	0	-	0	-	0	0	0	0	0	0
1149	0	-	0	-	0	0	0	0	0	0
1150	0	-	0	-	0	0	0	0	0	0
1151	0	-	0	-	0	0	0	0	0	0
1152	0	-	0	-	0	0	0	0	0	0
1153	0	-	0	-	0	0	0	0	0	0
1154	0	-	0	-	0	0	0	0	0	0
1155	0	-	0	-	0	0	0	0	0	0
1156	0	-	0	-	0	0	0	0	0	0
1157	0	-	0	-	0	0	0	0	0	0
1158	0	-	0	-	0	0	0	0	0	0
1159	0	-	0	-	0	0	0	0	0	0
1160	0	-	0	-	0	0	0	0	0	0
1161	0	-	0	-	0	0	0	0	0	0
1162	0	-	0	-	0	0	0	0	0	0
1163	0	-	0	-	0	0	0	0	0	0
1164	0	-	0	-	0	0	0	0	0	0
1165	0	-	0	-	0	0	0	0	0	0
1166	0	-	0	-	0	0	0	0	0	0
1167	0	-	0	-	0	0	0	0	0	0
1168	0	-	0	-	0	0	0	0	0	0
1169	0	-	0	-	0	0	0	0	0	0
1170	0	-	0	-	0	0	0	0	0	0
1171	0	-	0	-	0	0	0	0	0	0
1172	0	-	0	-	0	0	0	0	0	0
1173	0	-	0	-	0	0	0	0	0	0
1174	0	-	0	-	0	0	0	0	0	0
1175	0	-	0	-	0	0	0	0	0	0
1176	0	-	0	-	0	0	0	0	0	0
1177	0	-	0	-	0	0	0	0	0	0
1178	0	-	0	-	0	0	0	0	0	0
1179	0	-	0	-	0	0	0	0	0	0
1180	0	-	0	-	0	0	0	0	0	0
1181	0	-	0	-	0	0	0	0	0	0
1182	0	-	0	-	0	0	0	0	0	0
1183	0	-	0	-	0	0	0	0	0	0
1184	0	-	0	-	0	0	0	0	0	0
1185	0	-	0	-	0	0	0	0	0	0
1186	0	-	0	-	0	0	0	0	0	0
1187	0	-	0	-	0	0	0	0	0	0
1188	0	-	0	-	0	0	0	0	0	0
1189	0	-	0	-	0	0	0	0	0	0
1190	0	-	0	-	0	0	0	0	0	0
1191	0	-	0	-	0	0	0	0	0	0
1192	0	-	0	-	0	0	0	0	0	0
1193	0	-	0	-	0	0	0	0	0	0
1194	0	-	0	-	0	0	0	0	0	0
1195	0	-	0	-	0	0	0	0	0	0
1196	0	-	0	-	0	0	0	0	0	0
1197	0	-	0	-	0	0	0	0	0	0
1198	0	-	0	-	0	0	0	0	0	0
1199	0	-	0	-	0	0	0	0	0	0
1200	0	-	0	-	0	0	0	0	0	0
1201	0	-	0	-	0	0	0	0	0	0
1202	0	-	0	-	0	0	0	0	0	0
1203	0	-	0	-	0	0	0	0	0	0
1204	0	-	0	-	0	0	0	0	0	0
1205	0	-	0	-	0	0	0	0	0	0
1206	0	-	0	-	0	0	0	0	0	0
1207	0	-	0	-	0	0	0	0	0	0
1208	0	-	0	-	0	0	0	0	0	0
1209	0	-	0	-	0	0	0	0	0	0
1210	0	-	0	-	0	0	0	0	0	0
1211	0	-	0	-	0	0	0	0	0	0
1212	0	-	0	-	0	0	0	0	0	0
1213	0	-	0	-	0	0	0	0	0	0
1214	0	-	0	-	0	0	0	0	0	0
1215	0	-	0	-	0	0	0	0	0	0
1216	0	-	0	-	0	0	0	0	0	0
1217	0	-	0	-	0	0	0	0	0	0
1218	0	-	0	-	0	0	0	0	0	0
1219	0	-	0	-	0	0	0	0	0	0
1220	0	-	0	-	0	0	0	0	0	0
1221	0	-	0	-	0	0	0	0	0	0
1222	0	-	0	-	0	0	0	0	0	0
1223	0	-	0	-	0	0	0	0	0	0
1224	0	-	0	-	0	0	0	0	0	0
1225	0	-	0	-	0	0	0	0	0	0
1226	0	-	0	-	0	0	0	0	0	0
1227	0	-	0	-	0	0	0	0	0	0
1228	0	-	0	-	0	0	0	0	0	0
1229	0	-	0	-	0	0	0	0	0	0
1230	0	-	0	-	0	0	0	0	0	0
1231	0	-	0	-	0	0	0	0	0	0
1232	0	-	0	-	0	0	0	0	0	0
1233	0	-	0	-	0	0	0	0	0	0
1234	0	-	0	-	0	0	0	0	0	0
1235	0	-	0	-	0	0	0	0	0	0
1236	0	-	0	-	0	0	0	0	0	0
1237	0	-	0	-	0	0	0	0	0	0
1238	0	-	0	-	0	0	0	0	0	0
1239	0	-	0	-	0	0	0	0	0	0
1240	0	-	0	-	0	0	0	0	0	0
1241	0	-	0	-	0	0	0	0	0	0
1242	0	-	0	-	0	0	0	0	0	0
1243	0	-	0	-	0	0	0	0	0	0
1244	0	-	0	-	0	0	0	0	0	0
1245	0	-	0	-	0	0	0	0	0	0
1246	0	-	0	-	0	0	0	0	0	0
1247	0	-	0	-	0	0	0	0	0	0
1248	0	-	0	-	0	0	0	0	0	0
1249	0	-	0	-	0	0	0	0	0	0
1250	0	-	0	-	0	0	0	0	0	0
1251	0	-	0	-	0	0	0	0	0	0
1252	0	-	0	-	0	0	0	0	0	0
1253	0	-	0	-	0	0	0	0	0	0
1254	0	-	0	-	0	0	0	0	0	0
1255	0	-	0	-	0	0	0	0	0	0
1256	0	-	0	-	0	0	0	0	0	0
1257	0	-	0	-	0	0	0	0	0	0
1258	0	-	0	-	0	0	0	0	0	0
1259	0	-	0	-	0	0	0	0	0	0
1260	0	-	0	-	0	0	0	0	0	0
1261	0	-	0	-	0	0	0	0	0	0
1262	0	-	0	-	0	0	0	0	0	0
1263	0	-	0	-	0	0	0	0	0	0
1264	0	-	0	-	0	0	0	0	0	0
1265	0	-	0	-	0	0	0	0	0	0
1266	0	-	0	-	0	0	0	0	0	0
1267	0	-	0	-	0	0	0	0	0	0
1268	0	-	0	-	0	0	0	0	0	0
1269	0	-	0	-	0	0	0	0	0	0
1270	0	-	0	-	0	0	0	0	0	0
1271	0	-	0	-	0	0	0	0	0	0
1272	0	-	0	-	0	0	0	0	0	0
1273	0	-	0	-	0	0	0	0	0	0
1274	0	-	0	-	0	0	0	0	0	0
1275	0	-	0	-	0	0	0	0	0	0
1276	0	-	0	-	0	0	0	0	0	0
1277	0	-	0	-	0	0	0	0	0	0
1278	0	-	0	-	0	0	0	0	0	0
1279	0	-	0	-	0	0	0	0	0	0
1280	0	-	0	-	0	0	0	0	0	0
1281	0	-	0	-	0	0	0	0	0	0
1282	0	-	0	-	0	0	0	0	0	0
1283	0	-	0	-	0	0	0	0	0	0
1284	0	-	0	-	0	0	0	0	0	0
1285	0	-	0	-	0	0	0	0	0	0
1286	0	-	0	-	0	0	0	0	0	0
1287	0	-	0	-	0	0	0	0	0	0
1288	0	-	0	-	0	0	0	0	0	0
1289	0	-	0	-	0	0	0	0	0	0
1290	0	-	0	-	0	0	0	0	0	0
1291	0	-	0	-	0	0	0	0	0	0
1292	0	-	0	-	0	0	0	0	0	0
1293	0	-	0	-	0	0	0	0	0	0
1294	0	-	0	-	0	0	0	0	0	0
1295	0	-	0	-	0	0	0	0	0	0
1296	0	-	0	-	0	0	0	0	0	0
1297	0	-	0	-	0	0	0	0	0	0
1298	0	-	0	-	0	0	0	0	0	0
1299	0	-	0	-	0	0	0	0	0	0
1300	0	-	0	-	0	0	0	0	0	0
1301	0	-	0	-	0	0	0	0	0	0
1302	0	-	0	-	0	0	0	0	0	0
1303	0	-	0	-	0	0	0	0	0	0
1304	0	-	0	-	0	0	0	0	0	0
1305	0	-	0	-	0	0	0	0	0	0
1306	0	-	0	-	0	0	0	0	0	0
1307	0	-	0	-	0	0	0	0	0	0
1308	0	-	0	-	0	0	0	0	0	0
1309	0	-	0	-	0	0	0	0	0	0
1310	0	-	0	-	0	0	0	0	0	0
1311	0	-	0	-	0	0	0	0	0	0
1312	0	-	0	-	0	0	0	0	0	0
1313	0	-	0	-	0	0	0	0	0	0
1314	0	-	0	-	0	0	0	0	0	0
1315	0	-	0	-	0	0	0	0	0	0
1316	0	-	0	-	0	0	0	0	0	0
1317	0	-	0	-	0	0	0	0	0	0
1318	0	-	0	-	0	0	0	0	0	0
1319	0	-	0	-	0	0	0	0	0	0
1320	0	-	0	-	0	0	0	0	0	0
1321	0	-	0	-	0	0	0	0	0	0
1322	0	-	0	-	0	0	0	0	0	0
1323	0	-	0	-	0	0	0	0	0	0
1324	0	-	0	-	0	0	0	0	0	0
1325	0	-	0	-	0	0	0	0	0	0
1326	0	-	0	-	0	0	0	0	0	0
1327	0	-	0	-	0	0	0	0	0	0
1328	0	-	0	-	0	0	0	0	0	0
1329	0	-	0	-	0	0	0	0	0	0
1330	0	-	0	-	0	0	0	0	0	0
1331	0	-	0	-	0	0	0	0	0	0
1332	0	-	0	-	0	0	0	0	0	0
1333	0	-	0	-	0	0	0	0	0	0
1334	0	-	0	-	0	0	0	0	0	0
1335	0	-	0	-	0	0	0	0	0	0
1336	0	-	0	-	0	0	0	0	0	0
1337	0	-	0	-	0	0	0	0	0	0
1338	0	-	0	-	0	0	0	0	0	0
1339	0	-	0	-	0	0	0	0	0	0
1340	0	-	0	-	0	0	0	0	0	0
1341	0	-	0	-	0	0	0	0	0	0
1342	0	-	0	-	0	0	0	0	0	0
1343	0	-	0	-	0	0	0	0	0	0
1344	0	-	0	-	0	0	0	0	0	0
1345	0	-	0	-	0	0	0	0	0	0
1346	0	-	0	-	0	0	0	0	0	0
1347	0	-	0	-	0	0	0	0	0	0
1348	0	-	0	-	0	0	0	0	0	0
1349	0	-	0	-	0	0	0	0	0	0
1350	0	-	0	-	0	0	0	0	0	0
1351	0	-	0	-	0	0	0	0	0	0
1352	0	-	0	-	0	0	0	0	0	0
1353	0	-	0	-	0	0	0	0	0	0
1354	0	-	0	-	0	0	0	0	0	0
1355	0	-	0	-	0	0	0	0	0	0
1356	0	-	0	-	0	0	0	0	0	0
1357	0	-	0	-	0	0	0	0	0	0
1358	0	-	0	-	0	0	0	0	0	0
1359	0	-	0	-	0	0	0	0	0	0
1360	0	-	0	-	0	0	0	0	0	0
1361	0	-	0	-	0	0	0	0	0	0
1362	0	-	0	-	0	0	0	0	0	0
1363	0	-	0	-	0	0	0	0	0	0
1364	0	-	0	-	0	0	0	0	0	0
1365	0	-	0	-	0	0	0	0	0	0
1366	0	-	0	-	0	0	0	0	0	0
1367	0	-	0	-	0	0	0	0	0	0
1368	0	-	0	-	0	0	0	0	0	0
1369	0	-	0	-	0	0	0	0	0	0
1370	0	-	0	-	0	0	0	0	0	0
1371	0	-	0	-	0	0	0	0	0	0
1372	0	-	0	-	0	0	0	0	0	0
1373	0	-	0	-	0	0	0	0	0	0
1374	0	-	0	-	0	0	0	0	0	0
1375	0	-	0	-	0	0	0	0	0	0
1376	0	-	0	-	0	0	0	0	0	0
1377	0	-	0	-	0	0	0	0	0	0
1378	0	-	0	-	0	0	0	0	0	0
1379	0	-	0	-	0	0	0	0	0	0
1380	0	-	0	-	0	0	0	0	0	0
1381	0	-	0	-	0	0	0	0	0	0
1382	0	-	0	-	0	0	0	0	0	0
1383	0	-	0	-	0	0	0	0	0	0
1384	0	-	0	-	0	0	0	0	0	0
1385	0	-	0	-	0	0	0	0	0	0
1386	0	-	0	-	0	0	0	0	0	0
1387	0	-	0	-	0	0	0	0	0	0
1388	0	-	0	-	0	0	0	0	0	0
1389	0	-	0	-	0	0	0	0	0	0
1390	0	-	0	-	0	0	0	0	0	0
1391	0	-	0	-	0	0	0	0	0	0
1392	0	-	0	-	0	0	0	0	0	0
1393	0	-	0	-	0	0	0	0	0	0
1394	0	-	0	-	0	0	0	0	0	0
1395	0	-	0	-	0	0	0	0	0	0
1396	0	-	0	-	0	0	0	0	0	0
1397	0	-	0	-	0	0	0	0	0	0
1398	0	-	0	-	0	0	0	0	0	0
1399	0	-	0	-	0	0	0	0	0	0
1400	0	-	0	-	0	0	0	0	0	0
1401	0	-	0	-	0	0	0	0	0	0
1402	0	-	0	-	0	0	0	0	0	0
1403	0	-	0	-	0	0	0	0	0	0
1404	0	-	0	-	0	0	0	0	0	0
1405	0	-	0	-	0	0	0	0	0	0
1406	0	-	0	-	0	0	0	0	0	0
1407	0	-	0	-	0	0	0	0	0	0
1408	0	-	0	-	0	0	0	0	0	0
1409	0	-	0	-	0	0	0	0	0	0
1410	0	-	0	-	0	0	0	0	0	0
1411	0	-	0	-	0	0	0	0	0	0
1412	0	-	0	-	0	0	0	0	0	0
1413	0	-	0	-	0	0	0	0	0	0
1414	0	-	0	-	0	0	0	0	0	0
1415	0	-	0	-	0	0	0	0	0	0
1416	0	-	0	-	0	0	0	0	0	0
1417	0	-	0	-	0	0	0	0	0	0
1418	0	-	0	-	0	0	0	0	0	0
1419	0	-	0	-	0	0	0	0	0	0
1420	0	-	0	-	0	0	0	0	0	0
1421	0	-	0	-	0	0	0	0	0	0
1422	0	-	0	-	0	0	0	0	0	0
1423	0	-	0	-	0	0	0	0	0	0
1424	0	-	0	-	0	0	0	0	0	0
1425	0	-	0	-	0	0	0	0	0	0
1426	0	-	0	-	0	0	0	0	0	0
1427	0	-	0	-	0	0	0	0	0	0
1428	0	-	0	-	0	0	0	0	0	0
1429	0	-	0	-	0	0	0	0	0	0
1430	0	-	0	-	0	0	0	0	0	0
1431	0	-	0	-	0	0	0	0	0	0
1432	0	-	0	-	0	0	0	0	0	0
1433	0	-	0	-	0	0	0	0	0	0
1434	0	-	0	-	0	0	0	0	0	0
1435	0	-	0	-	0	0	0	0	0	0
1436	0	-	0	-	0	0	0	0	0	0
1437	0	-	0	-	0	0	0	0	0	0
1438	0	-	0	-	0	0	0	0	0	0
1439	0	-	0	-	0	0	0	0	0	0
1440	0	-	0	-	0	0	0	0	0	0
1441	0	-	0	-	0	0	0	0	0	0
1442	0	-	0	-	0	0	0	0	0	0
1443	0	-	0	-	0	0	0	0	0	0
1444	0	-	0	-	0	0	0	0	0	0
1445	0	-	0	-	0	0	0	0	0	0
1446	0	-	0	-	0	0	0	0	0	0
1447	0	-	0	-	0	0	0	0	0	0
1448	0	-	0	-	0	0	0	0	0	0
1449	0	-	0	-	0	0	0	0	0	0
1450	0	-	0	-	0	0	0	0	0	0
1451	0	-	0	-	0	0	0	0	0	0
1452	0	-	0	-	0	0	0	0	0	0
1453	0	-	0	-	0	0	0	0	0	0
1454	0	-	0	-	0	0	0	0	0	0
1455	0	-	0	-	0	0	0	0	0	0
1456	0	-	0	-	0	0	0	0	0	0
1457	0	-	0	-	0	0	0	0	0	0
1458	0	-	0	-	0	0	0	0	0	0
1459	0	-	0	-	0	0	0	0	0	0
1460	0	-	0	-	0	0	0	0	0	0
1461	0	-	0	-	0	0	0	0	0	0
1462	0	-	0	-	0	0	0	0	0	0
1463	0	-	0	-	0	0	0	0	0	0
1464	0	-	0	-	0	0	0	0	0	0
1465	0	-	0	-	0	0	0	0	0	0
1466	0	-	0	-	0	0	0	0	0	0
1467	0	-	0	-	0	0	0	0	0	0
1468	0	-	0	-	0	0	0	0	0	0
1469	0	-	0	-	0	0	0	0	0	0
1470	0	-	0	-	0	0	0	0	0	0
1471	0	-	0	-	0	0	0	0	0	0
1472	0	-	0	-	0	0	0	0	0	0
1473	0	-	0	-	0	0	0	0	0	0
1474	0	-	0	-	0	0	0	0	0	0
1475	0	-	0	-	0	0	0	0	0	0
1476	0	-	0	-	0	0	0	0	0	0
1477	0	-	0	-	0	0	0	0	0	0
1478	0	-	0	-	0	0	0	0	0	0
1479	0	-	0	-	0	0	0	0	0	0
1480	0	-	0	-	0	0	0	0	0	0
1481	0	-	0	-	0	0	0	0	0	0
1482	0	-	0	-	0	0	0	0	0	0
1483	0	-	0	-	0	0	0	0	0	0
1484	0	-	0	-	0	0	0	0	0	0
1485	0	-	0	-	0	0	0	0	0	0
1486	0	-	0	-	0	0	0	0	0	0
1487	0	-	0	-	0	0	0	0	0	0
1488	0	-	0	-	0	0	0	0	0	0
1489	0	-	0	-	0	0	0	0	0	0
1490	0	-	0	-	0	0	0	0	0	0
1491	0	-	0	-	0	0	0	0	0	0
1492	0	-	0	-	0	0	0	0	0	0
1493	0	-	0	-	0	0	0	0	0	0
1494	0	-	0	-	0	0	0	0	0	0
1495	0	-	0	-	0	0	0	0	0	0
1496	0	-	0	-	0	0	0	0	0	0
1497	0	-	0	-	0	0	0	0	0	0
1498	0	-	0	-	0	0	0	0	0	0
1499	0	-	0	-	0	0	0	0	0	0
1500	0	-	0	-	0	0	0	0	0	0
1501	0	-	0	-	0	0	0	0	0	0
1502	0	-	0	-	0	0	0	0	0	0
1503	0	-	0	-	0	0	0	0	0	0
1504	0	-	0	-	0	0	0	0	0	0
1505	0	-	0	-	0	0	0	0	0	0
1506	0	-	0	-	0	0	0	0	0	0
1507	0	-	0	-	0	0	0	0	0	0
1508	0	-	0	-	0	0	0	0	0	0
1509	0	-	0	-	0	0	0	0	0	0
1510	0	-	0	-	0	0	0	0	0	0
1511	0	-	0	-	0	0	0	0	0	0
1512	0	-	0	-	0	0	0	0	0	0
1513	0	-	0	-	0	0	0	0	0	0
1514	0	-	0	-	0	0	0	0	0	0
1515	0	-	0	-	0	0	0	0	0	0
1516	0	-	0	-	0	0	0	0	0	0
1517	0	-	0	-	0	0	0	0	0	0
1518	0	-	0	-	0	0	0	0	0	0
1519	0	-	0	-	0	0	0	0	0	0
1520	0	-	0	-	0	0	0	0	0	0
1521	0	-	0	-	0	0	0	0	0	0
1522	0	-	0	-	0	0	0	0	0	0
1523	0	-	0	-	0	0	0	0	0	0
1524	0	-	0	-	0	0	0	0	0	0
1525	0	-	0	-	0	0	0	0	0	0
1526	0	-	0	-	0	0	0	0	0	0
1527	0	-	0	-	0	0	0	0	0	0
1528	0	-	0	-	0	0	0	0	0	0
1529	0	-	0	-	0	0	0	0	0	0
1530	0	-	0	-	0	0	0	0	0	0
1531	0	-	0	-	0	0	0	0	0	0
1532	0	-	0	-	0	0	0	0	0	0
1533	0	-	0	-	0	0	0	0	0	0
1534	0	-	0	-	0	0	0	0	0	0
1535	0	-	0	-	0	0	0	0	0	0
1536	0	-	0	-	0	0	0	0	0	0
1537	0	-	0	-	0	0	0	0	0	0
1538	0	-	0	-	0	0	0	0	0	0
1539	0	-	0	-	0	0	0	0	0	0
1540	0	-	0	-	0	0	0	0	0	0
1541	0	-	0	-	0	0	0	0	0	0
1542	0	-	0	-	0	0	0	0	0	0
1543	0	-	0	-	0	0	0	0	0	0
1544	0	-	0	-	0	0	0	0	0	0
1545	0	-	0	-	0	0	0	0	0	0
1546	0	-	0	-	0	0	0	0	0	0
1547	0	-	0	-	0	0	0	0	0	0
1548	0	-	0	-	0	0	0	0	0	0
1549	0	-	0	-	0	0	0	0	0	0
1550	0	-	0	-	0	0	0	0	0	0
1551	0	-	0	-	0	0	0	0	0	0
1552	0	-	0	-	0	0	0	0	0	0
1553	0	-	0	-	0	0	0	0	0	0
1554	0	-	0	-	0	0	0	0	0	0
1555	0	-	0	-	0	0	0	0	0	0
1556	0	-	0	-	0	0	0	0	0	0
1557	0	-	0	-	0	0	0	0	0	0
1558	0	-	0	-	0	0	0	0	0	0
1559	0	-	0	-	0	0	0	0	0	0
1560	0	-	0	-	0	0	0	0	0	0
1561	0	-	0	-	0	0	0	0	0	0
1562	0	-	0	-	0	0	0	0	0	0
1563	0	-	0	-	0	0	0	0	0	0
1564	0	-	0	-	0	0	0	0	0	0
1565	0	-	0	-	0	0	0	0	0	0
1566	0	-	0	-	0	0	0	0	0	0
1567	0	-	0	-	0	0	0	0	0	0
1568	0	-	0	-	0	0	0	0	0	0
1569	0	-	0	-	0	0	0	0	0	0
1570	0	-	0	-	0	0	0	0	0	0
1571	0	-	0	-	0	0	0	0	0	0
1572	0	-	0	-	0	0	0	0	0	0
1573	0	-	0	-	0	0	0	0	0	0
1574	0	-	0	-	0	0	0	0	0	0
1575	0	-	0	-	0	0	0	0	0	0
1576	2	A	1	G	1	50	1	0	1	0
1577	2	T	2	A	0	0	0	0	0	2
1578	2	C	2	A	0	0	0	2	0	0
1579	12	T	12	A	0	0	0	0	0	12
1580	31604	T	31582	C	10	0.03	2	10	10	31582
1581	31948	G	31891	T	47	0.15	8	2	31891	47
1582	31989	G	31979	A	4	0.01	4	2	31979	4
1583	32076	A	32056	G	19	0.06	32056	0	19	1
1584	32252	A	32249	T	2	0.01	32249	0	1	2
1585	32314	A	32309	T	4	0.01	32309	0	1	4
1586	32155	G	32149	T	3	0.01	2	1	32149	3
1587	29177	T	29170	C	3	0.01	1	3	3	29170
1588	31604	G	31598	A	3	0.01	3	2	31598	1
1589	31728	C	31724	T	3	0.01	0	31724	1	3
1590	32258	A	32250	G	5	0.02	32250	1	5	2
1591	32076	C	32074	T	1	0	0	32074	1	1
1592	32207	T	32204	C	3	0.01	0	3	0	32204
1593	32276	T	32270	C	5	0.02	1	5	0	32270
1594	32338	G	32333	A	3	0.01	3	0	32333	2
1595	32173	G	32169	A	2	0.01	2	1	32169	1
1596	32311	A	32309	G	2	0.01	32309	0	2	0
1597	32182	C	32176	T	6	0.02	0	32176	0	6
1598	31923	G	31918	A	2	0.01	2	2	31918	1
1599	31873	A	31863	G	7	0.02	31863	0	7	3
1600	32242	A	32235	G	4	0.01	32235	0	4	3
1601	31644	C	31642	A	1	0	1	31642	0	1
1602	31607	C	31603	T	4	0.01	0	31603	0	4
1603	32274	A	32258	G	11	0.03	32258	0	11	5
1604	31772	G	31768	A	2	0.01	2	1	31768	1
1605	31767	A	31752	G	13	0.04	31752	0	13	2
1606	31766	G	31756	A	9	0.03	9	1	31756	0
1607	29734	T	29721	C	6	0.02	5	6	2	29721
1608	31764	G	31754	T	6	0.02	3	1	31754	6
1609	31358	T	31344	C	12	0.04	2	12	0	31344
1610	32189	A	32183	G	4	0.01	32183	0	4	2
1611	31879	G	31871	A	7	0.02	7	0	31871	1
1612	31844	C	31837	T	6	0.02	1	31837	0	6
1613	32234	T	32227	C	5	0.02	1	5	1	32227
1614	32234	T	32229	C	4	0.01	0	4	1	32229
1615	32427	A	32414	T	11	0.03	32414	0	2	11
1616	32422	A	32420	T	2	0.01	32420	0	0	2
1617	31608	C	31598	T	7	0.02	3	31598	0	7
1618	32166	A	32164	T	1	0	32164	0	1	1
1619	31520	C	31469	T	50	0.16	1	31469	0	50
1620	32152	A	32146	G	5	0.02	32146	0	5	1
1621	32414	A	32408	G	5	0.02	32408	0	5	1
1622	32222	A	32218	G	3	0.01	32218	0	3	1
1623	32096	G	32094	A	2	0.01	2	0	32094	0
1624	31023	C	31013	T	7	0.02	3	31013	0	7
1625	31812	A	31805	G	4	0.01	31805	0	4	3
1626	31718	C	31701	A	14	0.04	14	31701	0	3
1627	32103	C	32102	T	1	0	0	32102	0	1
1628	31657	C	31652	T	5	0.02	0	31652	0	5
1629	31988	A	31983	G	5	0.02	31983	0	5	0
1630	31989	A	31984	G	5	0.02	31984	0	5	0
1631	31602	C	31598	T	3	0.01	0	31598	1	3
1632	31867	T	31861	C	4	0.01	1	4	1	31861
1633	32014	T	32007	C	6	0.02	0	6	1	32007
1634	31974	A	31972	G	2	0.01	31972	0	2	0
1635	31220	C	31208	T	9	0.03	3	31208	0	9
1636	31775	A	31770	T	2	0.01	31770	1	2	2
1637	31547	C	31541	T	3	0.01	2	31541	1	3
1638	31889	T	31880	C	8	0.03	1	8	0	31880
1639	32482	T	32474	A	4	0.01	4	3	1	32474
1640	519	A	519	T	0	0	519	0	0	0
1641	313	G	313	A	0	0	0	0	313	0
1642	232	G	231	A	1	0.43	1	0	231	0
1643	190	A	190	T	0	0	190	0	0	0
1644	152	G	152	A	0	0	0	0	152	0
1645	111	A	111	T	0	0	111	0	0	0
1646	96	T	96	A	0	0	0	0	0	96
1647	93	T	93	A	0	0	0	0	0	93
1648	103	T	103	A	0	0	0	0	0	103
1649	107	C	107	A	0	0	0	107	0	0
1650	109	A	109	T	0	0	109	0	0	0
1651	103	A	103	T	0	0	103	0	0	0
1652	104	C	104	A	0	0	0	104	0	0
1653	105	T	105	A	0	0	0	0	0	105
1654	107	T	106	C	1	0.93	0	1	0	106
1655	105	A	105	T	0	0	105	0	0	0
1656	108	A	108	T	0	0	108	0	0	0
1657	108	C	108	A	0	0	0	108	0	0
1658	113	T	113	A	0	0	0	0	0	113
1659	115	T	115	A	0	0	0	0	0	115
1660	118	G	118	A	0	0	0	0	118	0
1661	118	A	118	T	0	0	118	0	0	0
1662	126	C	126	A	0	0	0	126	0	0
1663	130	C	130	A	0	0	0	130	0	0
1664	131	G	131	A	0	0	0	0	131	0
1665	135	C	135	A	0	0	0	135	0	0
1666	135	T	135	A	0	0	0	0	0	135
1667	142	C	142	A	0	0	0	142	0	0
1668	144	T	144	A	0	0	0	0	0	144
1669	147	G	147	A	0	0	0	0	147	0
1670	147	A	147	T	0	0	147	0	0	0
1671	144	G	144	A	0	0	0	0	144	0
1672	149	C	149	A	0	0	0	149	0	0
1673	144	T	143	C	1	0.69	0	1	0	143
1674	145	A	145	T	0	0	145	0	0	0
1675	146	A	145	C	1	0.68	145	1	0	0
1676	152	A	151	T	1	0.66	151	0	0	1
1677	154	C	154	A	0	0	0	154	0	0
1678	154	C	154	A	0	0	0	154	0	0
1679	149	T	149	A	0	0	0	0	0	149
1680	148	A	148	T	0	0	148	0	0	0
1681	153	G	152	A	1	0.65	1	0	152	0
1682	151	C	151	A	0	0	0	151	0	0
1683	162	C	162	A	0	0	0	162	0	0
1684	163	C	163	A	0	0	0	163	0	0
1685	168	C	168	A	0	0	0	168	0	0
1686	170	A	170	T	0	0	170	0	0	0
1687	172	A	172	T	0	0	172	0	0	0
1688	174	A	174	T	0	0	174	0	0	0
1689	183	C	182	A	1	0.55	1	182	0	0
1690	188	C	187	T	1	0.53	0	187	0	1
1691	189	C	189	A	0	0	0	189	0	0
1692	184	A	183	T	1	0.54	183	0	0	1
1693	185	C	184	T	1	0.54	0	184	0	1
1694	187	T	187	A	0	0	0	0	0	187
1695	187	C	187	A	0	0	0	187	0	0
1696	194	C	193	T	1	0.52	0	193	0	1
1697	187	A	187	T	0	0	187	0	0	0
1698	191	C	191	A	0	0	0	191	0	0
1699	193	C	193	A	0	0	0	193	0	0
1700	193	T	193	A	0	0	0	0	0	193
1701	198	T	198	A	0	0	0	0	0	198
1702	197	A	197	T	0	0	197	0	0	0
1703	195	C	195	A	0	0	0	195	0	0
1704	198	T	198	A	0	0	0	0	0	198
1705	198	A	198	T	0	0	198	0	0	0
1706	202	C	202	A	0	0	0	202	0	0
1707	204	C	203	T	1	0.49	0	203	0	1
1708	189	A	189	T	0	0	189	0	0	0
1709	186	G	186	A	0	0	0	0	186	0
1710	184	A	183	G	1	0.54	183	0	1	0
1711	184	C	184	A	0	0	0	184	0	0
1712	190	A	190	T	0	0	190	0	0	0
1713	189	A	189	T	0	0	189	0	0	0
1714	192	C	192	A	0	0	0	192	0	0
1715	193	C	193	A	0	0	0	193	0	0
1716	192	T	191	A	1	0.52	1	0	0	191
1717	192	T	192	A	0	0	0	0	0	192
1718	195	A	195	T	0	0	195	0	0	0
1719	191	G	191	A	0	0	0	0	191	0
1720	194	C	194	A	0	0	0	194	0	0
1721	199	C	199	A	0	0	0	199	0	0
1722	199	A	199	T	0	0	199	0	0	0
1723	196	A	196	T	0	0	196	0	0	0
1724	196	A	196	T	0	0	196	0	0	0
1725	196	C	196	A	0	0	0	196	0	0
1726	194	C	194	A	0	0	0	194	0	0
1727	191	A	191	T	0	0	191	0	0	0
1728	189	T	189	A	0	0	0	0	0	189
1729	187	T	187	A	0	0	0	0	0	187
1730	194	T	194	A	0	0	0	0	0	194
1731	196	A	196	T	0	0	196	0	0	0
1732	194	C	194	A	0	0	0	194	0	0
1733	195	C	195	A	0	0	0	195	0	0
1734	196	C	196	A	0	0	0	196	0	0
1735	196	A	196	T	0	0	196	0	0	0
1736	191	A	191	T	0	0	191	0	0	0
1737	189	A	189	T	0	0	189	0	0	0
1738	190	T	190	A	0	0	0	0	0	190
1739	198	A	198	T	0	0	198	0	0	0
1740	198	A	198	T	0	0	198	0	0	0
1741	195	A	195	T	0	0	195	0	0	0
1742	196	G	196	A	0	0	0	0	196	0
1743	186	T	186	A	0	0	0	0	0	186
1744	184	A	183	G	1	0.54	183	0	1	0
1745	176	T	176	A	0	0	0	0	0	176
1746	178	A	178	T	0	0	178	0	0	0
1747	176	G	176	A	0	0	0	0	176	0
1748	177	G	177	A	0	0	0	0	177	0
1749	172	C	172	A	0	0	0	172	0	0
1750	165	G	165	A	0	0	0	0	165	0
1751	169	A	169	T	0	0	169	0	0	0
1752	169	T	169	A	0	0	0	0	0	169
1753	170	A	170	T	0	0	170	0	0	0
1754	171	G	171	A	0	0	0	0	171	0
1755	179	A	179	T	0	0	179	0	0	0
1756	172	A	170	G	2	1.16	170	0	2	0
1757	176	A	176	T	0	0	176	0	0	0
1758	180	T	180	A	0	0	0	0	0	180
1759	181	T	181	A	0	0	0	0	0	181
1760	179	G	179	A	0	0	0	0	179	0
1761	176	A	176	T	0	0	176	0	0	0
1762	179	A	179	T	0	0	179	0	0	0
1763	176	A	176	T	0	0	176	0	0	0
1764	179	C	179	A	0	0	0	179	0	0
1765	182	C	182	A	0	0	0	182	0	0
1766	191	T	191	A	0	0	0	0	0	191
1767	195	G	195	A	0	0	0	0	195	0
1768	199	G	199	A	0	0	0	0	199	0
1769	207	C	207	A	0	0	0	207	0	0
1770	206	G	206	A	0	0	0	0	206	0
1771	206	C	206	A	0	0	0	206	0	0
1772	213	A	213	T	0	0	213	0	0	0
1773	211	A	211	T	0	0	211	0	0	0
1774	209	T	209	A	0	0	0	0	0	209
1775	209	A	208	T	1	0.48	208	0	0	1
1776	212	G	212	A	0	0	0	0	212	0
1777	210	A	210	T	0	0	210	0	0	0
1778	207	T	207	A	0	0	0	0	0	207
1779	209	A	209	T	0	0	209	0	0	0
1780	206	T	206	A	0	0	0	0	0	206
1781	213	A	213	T	0	0	213	0	0	0
1782	207	G	207	A	0	0	0	0	207	0
1783	210	T	210	A	0	0	0	0	0	210
1784	207	A	207	T	0	0	207	0	0	0
1785	224	C	224	A	0	0	0	224	0	0
1786	224	C	224	A	0	0	0	224	0	0
1787	225	G	225	A	0	0	0	0	225	0
1788	227	C	227	A	0	0	0	227	0	0
1789	229	A	229	T	0	0	229	0	0	0
1790	223	A	223	T	0	0	223	0	0	0
1791	224	G	224	A	0	0	0	0	224	0
1792	228	G	228	A	0	0	0	0	228	0
1793	228	G	228	A	0	0	0	0	228	0
1794	232	A	232	T	0	0	232	0	0	0
1795	232	A	232	T	0	0	232	0	0	0
1796	231	A	231	T	0	0	231	0	0	0
1797	235	G	235	A	0	0	0	0	235	0
1798	232	A	232	T	0	0	232	0	0	0
1799	233	T	233	A	0	0	0	0	0	233
1800	236	G	236	A	0	0	0	0	236	0
1801	237	A	237	T	0	0	237	0	0	0
1802	237	A	237	T	0	0	237	0	0	0
1803	238	A	238	T	0	0	238	0	0	0
1804	242	A	242	T	0	0	242	0	0	0
1805	241	A	241	T	0	0	241	0	0	0
1806	239	T	239	A	0	0	0	0	0	239
1807	247	T	247	A	0	0	0	0	0	247
1808	244	A	244	T	0	0	244	0	0	0
1809	240	T	240	A	0	0	0	0	0	240
1810	241	A	241	T	0	0	241	0	0	0
1811	236	A	236	T	0	0	236	0	0	0
1812	239	C	239	A	0	0	0	239	0	0
1813	240	C	240	A	0	0	0	240	0	0
1814	238	A	238	T	0	0	238	0	0	0
1815	231	A	231	T	0	0	231	0	0	0
1816	231	G	231	A	0	0	0	0	231	0
1817	229	C	229	A	0	0	0	229	0	0
1818	228	A	228	T	0	0	228	0	0	0
1819	222	T	222	A	0	0	0	0	0	222
1820	220	A	220	T	0	0	220	0	0	0
1821	223	A	223	T	0	0	223	0	0	0
1822	226	T	226	A	0	0	0	0	0	226
1823	229	A	228	G	1	0.44	228	0	1	0
1824	225	T	225	A	0	0	0	0	0	225
1825	232	A	232	T	0	0	232	0	0	0
1826	219	G	219	A	0	0	0	0	219	0
1827	219	C	219	A	0	0	0	219	0	0
1828	218	A	218	T	0	0	218	0	0	0
1829	208	A	208	T	0	0	208	0	0	0
1830	210	G	210	A	0	0	0	0	210	0
1831	209	G	209	A	0	0	0	0	209	0
1832	198	A	197	G	1	0.51	197	0	1	0
1833	198	C	198	A	0	0	0	198	0	0
1834	197	T	197	A	0	0	0	0	0	197
1835	201	A	201	T	0	0	201	0	0	0
1836	199	A	199	T	0	0	199	0	0	0
1837	200	C	200	A	0	0	0	200	0	0
1838	213	C	213	A	0	0	0	213	0	0
1839	215	C	215	A	0	0	0	215	0	0
1840	216	C	215	A	1	0.46	1	215	0	0
1841	210	T	209	G	1	0.48	0	0	1	209
1842	209	A	208	G	1	0.48	208	0	1	0
1843	209	T	209	A	0	0	0	0	0	209
1844	209	A	209	T	0	0	209	0	0	0
1845	197	C	197	A	0	0	0	197	0	0
1846	197	C	197	A	0	0	0	197	0	0
1847	196	T	196	A	0	0	0	0	0	196
1848	192	T	192	A	0	0	0	0	0	192
1849	192	C	191	G	1	0.52	0	191	1	0
1850	193	T	193	A	0	0	0	0	0	193
1851	191	G	191	A	0	0	0	0	191	0
1852	192	C	192	A	0	0	0	192	0	0
1853	193	A	193	T	0	0	193	0	0	0
1854	189	T	189	A	0	0	0	0	0	189
1855	192	A	192	T	0	0	192	0	0	0
1856	191	A	191	T	0	0	191	0	0	0
1857	199	T	199	A	0	0	0	0	0	199
1858	197	G	197	A	0	0	0	0	197	0
1859	192	A	192	T	0	0	192	0	0	0
1860	191	A	191	T	0	0	191	0	0	0
1861	190	T	190	A	0	0	0	0	0	190
1862	192	T	192	A	0	0	0	0	0	192
1863	196	A	196	T	0	0	196	0	0	0
1864	194	A	194	T	0	0	194	0	0	0
1865	196	C	196	A	0	0	0	196	0	0
1866	208	T	208	A	0	0	0	0	0	208
1867	199	A	199	T	0	0	199	0	0	0
1868	204	G	204	A	0	0	0	0	204	0
1869	214	A	214	T	0	0	214	0	0	0
1870	216	A	216	T	0	0	216	0	0	0
1871	215	A	215	T	0	0	215	0	0	0
1872	219	T	219	A	0	0	0	0	0	219
1873	226	A	226	T	0	0	226	0	0	0
1874	227	A	227	T	0	0	227	0	0	0
1875	228	C	228	A	0	0	0	228	0	0
1876	230	T	229	A	1	0.43	1	0	0	229
1877	230	T	230	A	0	0	0	0	0	230
1878	232	T	232	A	0	0	0	0	0	232
1879	232	G	232	A	0	0	0	0	232	0
1880	237	C	237	A	0	0	0	237	0	0
1881	240	A	240	T	0	0	240	0	0	0
1882	237	A	237	T	0	0	237	0	0	0
1883	238	G	234	A	4	1.68	4	0	234	0
1884	238	G	238	A	0	0	0	0	238	0
1885	228	A	228	T	0	0	228	0	0	0
1886	227	G	227	A	0	0	0	0	227	0
1887	223	A	223	T	0	0	223	0	0	0
1888	226	G	222	A	4	1.77	4	0	222	0
1889	226	C	226	A	0	0	0	226	0	0
1890	225	C	225	A	0	0	0	225	0	0
1891	226	A	226	T	0	0	226	0	0	0
1892	230	A	230	T	0	0	230	0	0	0
1893	229	A	229	T	0	0	229	0	0	0
1894	237	G	237	A	0	0	0	0	237	0
1895	234	C	234	A	0	0	0	234	0	0
1896	229	T	228	C	1	0.44	0	1	0	228
1897	231	A	231	T	0	0	231	0	0	0
1898	217	A	217	T	0	0	217	0	0	0
1899	215	G	215	A	0	0	0	0	215	0
1900	210	A	210	T	0	0	210	0	0	0
1901	209	C	209	A	0	0	0	209	0	0
1902	211	C	211	A	0	0	0	211	0	0
1903	207	C	207	A	0	0	0	207	0	0
1904	208	C	207	T	1	0.48	0	207	0	1
1905	202	C	202	A	0	0	0	202	0	0
1906	202	G	202	A	0	0	0	0	202	0
1907	201	A	201	T	0	0	201	0	0	0
1908	203	A	203	T	0	0	203	0	0	0
1909	202	A	202	T	0	0	202	0	0	0
1910	207	C	207	A	0	0	0	207	0	0
1911	207	C	207	A	0	0	0	207	0	0
1912	205	A	205	T	0	0	205	0	0	0
1913	202	G	202	A	0	0	0	0	202	0
1914	199	A	199	T	0	0	199	0	0	0
1915	200	C	200	A	0	0	0	200	0	0
1916	202	G	201	T	1	0.5	0	0	201	1
1917	195	A	195	T	0	0	195	0	0	0
1918	194	G	194	A	0	0	0	0	194	0
1919	196	C	196	A	0	0	0	196	0	0
1920	195	T	195	A	0	0	0	0	0	195
1921	210	A	210	T	0	0	210	0	0	0
1922	212	C	212	A	0	0	0	212	0	0
1923	210	C	210	A	0	0	0	210	0	0
1924	223	T	223	A	0	0	0	0	0	223
1925	226	A	226	T	0	0	226	0	0	0
1926	213	A	213	T	0	0	213	0	0	0
1927	214	G	214	A	0	0	0	0	214	0
1928	210	A	210	T	0	0	210	0	0	0
1929	206	A	206	T	0	0	206	0	0	0
1930	202	C	202	A	0	0	0	202	0	0
1931	202	A	202	T	0	0	202	0	0	0
1932	193	G	193	A	0	0	0	0	193	0
1933	189	C	189	A	0	0	0	189	0	0
1934	192	T	192	A	0	0	0	0	0	192
1935	192	A	192	T	0	0	192	0	0	0
1936	191	A	191	T	0	0	191	0	0	0
1937	190	A	190	T	0	0	190	0	0	0
1938	194	A	194	T	0	0	194	0	0	0
1939	194	G	194	A	0	0	0	0	194	0
1940	186	A	186	T	0	0	186	0	0	0
1941	184	G	184	A	0	0	0	0	184	0
1942	186	C	186	A	0	0	0	186	0	0
1943	181	A	181	T	0	0	181	0	0	0
1944	192	C	192	A	0	0	0	192	0	0
1945	177	A	176	C	1	0.56	176	1	0	0
1946	189	C	189	A	0	0	0	189	0	0
1947	194	C	194	A	0	0	0	194	0	0
1948	192	C	192	A	0	0	0	192	0	0
1949	189	G	189	A	0	0	0	0	189	0
1950	193	T	193	A	0	0	0	0	0	193
1951	196	C	196	A	0	0	0	196	0	0
1952	197	T	197	A	0	0	0	0	0	197
1953	199	A	199	T	0	0	199	0	0	0
1954	193	T	193	A	0	0	0	0	0	193
1955	192	G	191	T	1	0.52	0	0	191	1
1956	196	T	196	A	0	0	0	0	0	196
1957	196	A	195	T	1	0.51	195	0	0	1
1958	196	G	196	A	0	0	0	0	196	0
1959	193	C	193	A	0	0	0	193	0	0
1960	192	A	192	T	0	0	192	0	0	0
1961	199	A	199	T	0	0	199	0	0	0
1962	197	A	197	T	0	0	197	0	0	0
1963	198	A	198	T	0	0	198	0	0	0
1964	200	T	200	A	0	0	0	0	0	200
1965	199	A	199	T	0	0	199	0	0	0
1966	200	G	200	A	0	0	0	0	200	0
1967	200	T	200	A	0	0	0	0	0	200
1968	202	G	202	A	0	0	0	0	202	0
1969	203	G	203	A	0	0	0	0	203	0
1970	203	G	203	A	0	0	0	0	203	0
1971	204	A	204	T	0	0	204	0	0	0
1972	205	A	205	T	0	0	205	0	0	0
1973	205	G	205	A	0	0	0	0	205	0
1974	204	A	204	T	0	0	204	0	0	0
1975	205	T	205	A	0	0	0	0	0	205
1976	209	T	209	A	0	0	0	0	0	209
1977	210	T	210	A	0	0	0	0	0	210
1978	211	A	211	T	0	0	211	0	0	0
1979	214	T	213	C	1	0.47	0	1	0	213
1980	214	A	214	T	0	0	214	0	0	0
1981	205	G	205	A	0	0	0	0	205	0
1982	205	G	205	A	0	0	0	0	205	0
1983	201	T	201	A	0	0	0	0	0	201
1984	190	A	190	T	0	0	190	0	0	0
1985	188	G	187	C	1	0.53	0	1	187	0
1986	192	A	192	T	0	0	192	0	0	0
1987	196	G	196	A	0	0	0	0	196	0
1988	198	G	198	A	0	0	0	0	198	0
1989	195	C	195	A	0	0	0	195	0	0
1990	196	G	196	A	0	0	0	0	196	0
1991	195	A	195	T	0	0	195	0	0	0
1992	195	C	195	A	0	0	0	195	0	0
1993	195	A	195	T	0	0	195	0	0	0
1994	196	A	196	T	0	0	196	0	0	0
1995	198	A	198	T	0	0	198	0	0	0
1996	197	C	197	A	0	0	0	197	0	0
1997	197	C	197	A	0	0	0	197	0	0
1998	193	T	193	A	0	0	0	0	0	193
1999	191	A	191	T	0	0	191	0	0	0
[truncated: 14,570 more rows]

## Sheet: legend
Supplementary Table 2: Mapping of MiSEQ reads derived from purely amplified polycistronic fragments to the rCRS. The reads are derived from the purely amplified polycistronic fragments, as evident from the exclusive sequence coverage between positions 1580 – 3414. Notice the extreme high coverage around position 2617 and adjacent to the beginning of each of the PCR amplified fragments – sequencin…
