# Supplementary material for: The International Centre for the Uplands - Cumbria.
Source: HighWire-hosted journal article supplement (doi:10.1101/gr.161265.113), 2004-01-01
Supplement: Supplemental_Table_3.xlsx [file Supplemental_Table_3.xlsx]

## Sheet: GM14381
pos	hq	indels	best	best_count	second_best	second_best_count	second_best_for	second_best_rev	fraction_percent	A	A.for	A.rev	C	C.for	C.rev	G	G.for	G.rev	T	T.for	T.rev	best_count.for	best_count.rev	LCR	gene	coding for	Filter A	Filter B	Filter C	Filter D
1	4	0	G	4	A	0	0	0	0	0	0	0	0	0	0	4	0	4	0	0	0	0	4	0	MT-DLOOP	D-LOOP	0	1	1	1
2	22	0	A	22	T	0	0	0	0	22	3	19	0	0	0	0	0	0	0	0	0	3	19	0	MT-DLOOP	D-LOOP	0	1	1	1
3	24	0	T	24	A	0	0	0	0	0	0	0	0	0	0	0	0	0	24	4	20	4	20	0	MT-DLOOP	D-LOOP	0	1	1	1
4	47	0	C	46	G	1	1	0	2.13	0	0	0	46	23	23	1	1	0	0	0	0	23	23	0	MT-DLOOP	D-LOOP	0	1	1	1
5	45	0	A	44	C	1	1	0	2.22	44	23	21	1	1	0	0	0	0	0	0	0	23	21	0	MT-DLOOP	D-LOOP	0	1	1	1
6	49	0	C	49	A	0	0	0	0	0	0	0	49	25	24	0	0	0	0	0	0	25	24	0	MT-DLOOP	D-LOOP	0	1	1	1
7	55	0	A	55	T	0	0	0	0	55	25	30	0	0	0	0	0	0	0	0	0	25	30	0	MT-DLOOP	D-LOOP	0	1	1	1
8	71	0	G	71	A	0	0	0	0	0	0	0	0	0	0	71	28	43	0	0	0	28	43	0	MT-DLOOP	D-LOOP	0	1	1	1
9	93	0	G	92	A	1	0	1	1.08	1	0	1	0	0	0	92	29	63	0	0	0	29	63	0	MT-DLOOP	D-LOOP	0	1	1	1
10	96	0	T	96	A	0	0	0	0	0	0	0	0	0	0	0	0	0	96	29	67	29	67	0	MT-DLOOP	D-LOOP	0	1	1	1
11	101	0	C	100	A	1	0	1	0.99	1	0	1	100	30	70	0	0	0	0	0	0	30	70	0	MT-DLOOP	D-LOOP	0	1	1	1
12	106	0	T	106	A	0	0	0	0	0	0	0	0	0	0	0	0	0	106	34	72	34	72	0	MT-DLOOP	D-LOOP	0	1	1	1
13	101	0	A	100	G	1	1	0	0.99	100	33	67	0	0	0	1	1	0	0	0	0	33	67	0	MT-DLOOP	D-LOOP	0	1	1	1
14	100	0	T	100	A	0	0	0	0	0	0	0	0	0	0	0	0	0	100	34	66	34	66	0	MT-DLOOP	D-LOOP	0	1	1	1
15	119	0	C	119	A	0	0	0	0	0	0	0	119	44	75	0	0	0	0	0	0	44	75	0	MT-DLOOP	D-LOOP	0	1	1	1
16	83	0	A	79	T	2	2	0	2.41	79	44	35	1	1	0	1	1	0	2	2	0	44	35	0	MT-DLOOP	D-LOOP	0	1	1	1
17	136	0	C	136	A	0	0	0	0	0	0	0	136	53	83	0	0	0	0	0	0	53	83	0	MT-DLOOP	D-LOOP	0	1	1	1
18	140	0	C	140	A	0	0	0	0	0	0	0	140	54	86	0	0	0	0	0	0	54	86	0	MT-DLOOP	D-LOOP	0	1	1	1
19	147	0	C	147	A	0	0	0	0	0	0	0	147	64	83	0	0	0	0	0	0	64	83	0	MT-DLOOP	D-LOOP	0	1	1	1
20	154	0	T	154	A	0	0	0	0	0	0	0	0	0	0	0	0	0	154	67	87	67	87	0	MT-DLOOP	D-LOOP	0	1	1	1
21	159	0	A	159	T	0	0	0	0	159	70	89	0	0	0	0	0	0	0	0	0	70	89	0	MT-DLOOP	D-LOOP	0	1	1	1
22	162	0	T	162	A	0	0	0	0	0	0	0	0	0	0	0	0	0	162	70	92	70	92	0	MT-DLOOP	D-LOOP	0	1	1	1
23	165	0	T	165	A	0	0	0	0	0	0	0	0	0	0	0	0	0	165	71	94	71	94	0	MT-DLOOP	D-LOOP	0	1	1	1
24	172	0	A	172	T	0	0	0	0	172	75	97	0	0	0	0	0	0	0	0	0	75	97	0	MT-DLOOP	D-LOOP	0	1	1	1
25	182	0	A	182	T	0	0	0	0	182	75	107	0	0	0	0	0	0	0	0	0	75	107	0	MT-DLOOP	D-LOOP	0	1	1	1
26	198	0	C	198	A	0	0	0	0	0	0	0	198	75	123	0	0	0	0	0	0	75	123	0	MT-DLOOP	D-LOOP	0	1	1	1
27	193	0	C	193	A	0	0	0	0	0	0	0	193	75	118	0	0	0	0	0	0	75	118	0	MT-DLOOP	D-LOOP	0	1	1	1
28	172	0	A	171	T	1	0	1	0.58	171	75	96	0	0	0	0	0	0	1	0	1	75	96	0	MT-DLOOP	D-LOOP	0	1	1	1
29	212	0	C	212	A	0	0	0	0	0	0	0	212	88	124	0	0	0	0	0	0	88	124	0	MT-DLOOP	D-LOOP	0	1	1	1
30	201	0	T	201	A	0	0	0	0	0	0	0	0	0	0	0	0	0	201	89	112	89	112	0	MT-DLOOP	D-LOOP	0	1	1	1
31	215	0	C	215	A	0	0	0	0	0	0	0	215	97	118	0	0	0	0	0	0	97	118	0	MT-DLOOP	D-LOOP	0	1	1	1
32	215	0	A	215	T	0	0	0	0	215	99	116	0	0	0	0	0	0	0	0	0	99	116	0	MT-DLOOP	D-LOOP	0	1	1	1
33	232	0	C	232	A	0	0	0	0	0	0	0	232	105	127	0	0	0	0	0	0	105	127	0	MT-DLOOP	D-LOOP	0	1	1	1
34	238	0	G	237	T	1	0	1	0.42	0	0	0	0	0	0	237	109	128	1	0	1	109	128	0	MT-DLOOP	D-LOOP	0	1	1	1
35	240	0	G	239	A	1	0	1	0.42	1	0	1	0	0	0	239	109	130	0	0	0	109	130	0	MT-DLOOP	D-LOOP	0	1	1	1
36	248	0	G	247	C	1	0	1	0.4	0	0	0	1	0	1	247	118	129	0	0	0	118	129	0	MT-DLOOP	D-LOOP	0	1	1	1
37	256	0	A	256	T	0	0	0	0	256	118	138	0	0	0	0	0	0	0	0	0	118	138	0	MT-DLOOP	D-LOOP	0	1	1	1
38	263	0	G	263	A	0	0	0	0	0	0	0	0	0	0	263	123	140	0	0	0	123	140	0	MT-DLOOP	D-LOOP	0	1	1	1
39	277	0	C	277	A	0	0	0	0	0	0	0	277	128	149	0	0	0	0	0	0	128	149	0	MT-DLOOP	D-LOOP	0	1	1	1
40	272	0	T	272	A	0	0	0	0	0	0	0	0	0	0	0	0	0	272	133	139	133	139	0	MT-DLOOP	D-LOOP	0	1	1	1
41	296	0	C	295	T	1	1	0	0.34	0	0	0	295	147	148	0	0	0	1	1	0	147	148	0	MT-DLOOP	D-LOOP	0	1	1	1
42	300	0	T	298	C	2	1	1	0.67	0	0	0	2	1	1	0	0	0	298	149	149	149	149	0	MT-DLOOP	D-LOOP	0	1	1	1
43	306	0	C	305	A	1	1	0	0.33	1	1	0	305	152	153	0	0	0	0	0	0	152	153	0	MT-DLOOP	D-LOOP	0	1	1	1
44	408	0	C	407	T	1	0	1	0.25	0	0	0	407	157	250	0	0	0	1	0	1	157	250	0	MT-DLOOP	D-LOOP	0	1	1	1
45	401	0	A	400	C	1	0	1	0.25	400	158	242	1	0	1	0	0	0	0	0	0	158	242	0	MT-DLOOP	D-LOOP	0	1	1	1
46	420	0	T	420	A	0	0	0	0	0	0	0	0	0	0	0	0	0	420	169	251	169	251	0	MT-DLOOP	D-LOOP	0	1	1	1
47	434	0	G	434	A	0	0	0	0	0	0	0	0	0	0	434	176	258	0	0	0	176	258	0	MT-DLOOP	D-LOOP	0	1	1	1
48	431	0	C	429	A	1	0	1	0.23	1	0	1	429	175	254	0	0	0	1	0	1	175	254	0	MT-DLOOP	D-LOOP	0	1	1	1
49	425	0	A	425	T	0	0	0	0	425	180	245	0	0	0	0	0	0	0	0	0	180	245	0	MT-DLOOP	D-LOOP	0	1	1	1
50	440	0	T	440	A	0	0	0	0	0	0	0	0	0	0	0	0	0	440	183	257	183	257	0	MT-DLOOP	D-LOOP	0	1	1	1
51	451	0	T	451	A	0	0	0	0	0	0	0	0	0	0	0	0	0	451	190	261	190	261	0	MT-DLOOP	D-LOOP	0	1	1	1
52	443	0	T	443	A	0	0	0	0	0	0	0	0	0	0	0	0	0	443	193	250	193	250	0	MT-DLOOP	D-LOOP	0	1	1	1
53	464	0	G	464	A	0	0	0	0	0	0	0	0	0	0	464	195	269	0	0	0	195	269	0	MT-DLOOP	D-LOOP	0	1	1	1
54	470	0	G	470	A	0	0	0	0	0	0	0	0	0	0	470	202	268	0	0	0	202	268	0	MT-DLOOP	D-LOOP	0	1	1	1
55	463	0	T	463	A	0	0	0	0	0	0	0	0	0	0	0	0	0	463	200	263	200	263	0	MT-DLOOP	D-LOOP	0	1	1	1
56	452	0	A	452	T	0	0	0	0	452	207	245	0	0	0	0	0	0	0	0	0	207	245	2	MT-DLOOP	D-LOOP	1	1	1	1
57	479	0	T	479	A	0	0	0	0	0	0	0	0	0	0	0	0	0	479	213	266	213	266	6	MT-DLOOP	D-LOOP	1	1	1	1
58	477	0	T	477	A	0	0	0	0	0	0	0	0	0	0	0	0	0	477	213	264	213	264	5	MT-DLOOP	D-LOOP	1	1	1	1
59	475	0	T	475	A	0	0	0	0	0	0	0	0	0	0	0	0	0	475	213	262	213	262	4	MT-DLOOP	D-LOOP	1	1	1	1
60	437	0	T	437	A	0	0	0	0	0	0	0	0	0	0	0	0	0	437	213	224	213	224	3	MT-DLOOP	D-LOOP	1	1	1	1
61	478	0	C	477	A	1	1	0	0.21	1	1	0	477	211	266	0	0	0	0	0	0	211	266	1	MT-DLOOP	D-LOOP	1	1	1	1
62	510	0	G	510	A	0	0	0	0	0	0	0	0	0	0	510	217	293	0	0	0	217	293	0	MT-DLOOP	D-LOOP	0	1	1	1
63	496	0	T	496	A	0	0	0	0	0	0	0	0	0	0	0	0	0	496	217	279	217	279	0	MT-DLOOP	D-LOOP	0	1	1	1
64	522	0	C	521	G	1	0	1	0.19	0	0	0	521	230	291	1	0	1	0	0	0	230	291	0	MT-DLOOP	D-LOOP	0	1	1	1
65	499	0	T	496	C	3	3	0	0.6	0	0	0	3	3	0	0	0	0	496	234	262	234	262	2	MT-DLOOP	D-LOOP	1	1	1	1
66	547	0	G	546	T	1	1	0	0.18	0	0	0	0	0	0	546	240	306	1	1	0	240	306	2	MT-DLOOP	D-LOOP	1	1	1	1
67	551	0	G	551	A	0	0	0	0	0	0	0	0	0	0	551	242	309	0	0	0	242	309	2	MT-DLOOP	D-LOOP	1	1	1	1
68	558	0	G	557	C	1	1	0	0.18	0	0	0	1	1	0	557	252	305	0	0	0	252	305	4	MT-DLOOP	D-LOOP	1	1	1	1
69	559	0	G	558	A	1	1	0	0.18	1	1	0	0	0	0	558	253	305	0	0	0	253	305	3	MT-DLOOP	D-LOOP	1	1	1	1
70	557	0	G	557	A	0	0	0	0	0	0	0	0	0	0	557	254	303	0	0	0	254	303	1	MT-DLOOP	D-LOOP	1	1	1	1
71	555	0	G	555	A	0	0	0	0	0	0	0	0	0	0	555	256	299	0	0	0	256	299	1	MT-DLOOP	D-LOOP	1	1	1	1
72	403	0	T	403	A	0	0	0	0	0	0	0	0	0	0	0	0	0	403	105	298	105	298	1	MT-DLOOP	D-LOOP	1	1	1	1
73	542	0	G	542	A	0	0	0	0	0	0	0	0	0	0	542	236	306	0	0	0	236	306	0	MT-DLOOP	D-LOOP	0	1	1	1
74	502	0	T	502	A	0	0	0	0	0	0	0	0	0	0	0	0	0	502	211	291	211	291	0	MT-DLOOP	D-LOOP	0	1	1	1
75	586	0	G	585	C	1	0	1	0.17	0	0	0	1	0	1	585	294	291	0	0	0	294	291	0	MT-DLOOP	D-LOOP	0	1	1	1
76	628	0	C	628	A	0	0	0	0	0	0	0	628	334	294	0	0	0	0	0	0	334	294	0	MT-DLOOP	D-LOOP	0	1	1	1
77	607	0	A	605	G	2	2	0	0.33	605	335	270	0	0	0	2	2	0	0	0	0	335	270	0	MT-DLOOP	D-LOOP	0	1	1	1
78	660	0	C	660	A	0	0	0	0	0	0	0	660	355	305	0	0	0	0	0	0	355	305	0	MT-DLOOP	D-LOOP	0	1	1	1
79	676	0	G	675	C	1	0	1	0.15	0	0	0	1	0	1	675	358	317	0	0	0	358	317	0	MT-DLOOP	D-LOOP	0	1	1	1
80	676	0	C	676	A	0	0	0	0	0	0	0	676	364	312	0	0	0	0	0	0	364	312	0	MT-DLOOP	D-LOOP	0	1	1	1
81	676	0	G	674	A	2	2	0	0.3	2	2	0	0	0	0	674	364	310	0	0	0	364	310	0	MT-DLOOP	D-LOOP	0	1	1	1
82	683	0	A	683	T	0	0	0	0	683	368	315	0	0	0	0	0	0	0	0	0	368	315	0	MT-DLOOP	D-LOOP	0	1	1	1
83	714	0	T	712	C	2	1	1	0.28	0	0	0	2	1	1	0	0	0	712	369	343	369	343	0	MT-DLOOP	D-LOOP	0	1	1	1
84	700	0	A	700	T	0	0	0	0	700	368	332	0	0	0	0	0	0	0	0	0	368	332	0	MT-DLOOP	D-LOOP	0	1	1	1
85	716	0	G	716	A	0	0	0	0	0	0	0	0	0	0	716	370	346	0	0	0	370	346	0	MT-DLOOP	D-LOOP	0	1	1	1
86	723	0	C	722	A	1	0	1	0.14	1	0	1	722	374	348	0	0	0	0	0	0	374	348	0	MT-DLOOP	D-LOOP	0	1	1	1
87	687	0	A	687	T	0	0	0	0	687	373	314	0	0	0	0	0	0	0	0	0	373	314	0	MT-DLOOP	D-LOOP	0	1	1	1
88	722	0	T	722	A	0	0	0	0	0	0	0	0	0	0	0	0	0	722	375	347	375	347	0	MT-DLOOP	D-LOOP	0	1	1	1
89	704	0	T	704	A	0	0	0	0	0	0	0	0	0	0	0	0	0	704	376	328	376	328	0	MT-DLOOP	D-LOOP	0	1	1	1
90	731	0	G	731	A	0	0	0	0	0	0	0	0	0	0	731	379	352	0	0	0	379	352	0	MT-DLOOP	D-LOOP	0	1	1	1
91	737	0	C	737	A	0	0	0	0	0	0	0	737	380	357	0	0	0	0	0	0	380	357	0	MT-DLOOP	D-LOOP	0	1	1	1
92	747	0	G	747	A	0	0	0	0	0	0	0	0	0	0	747	381	366	0	0	0	381	366	0	MT-DLOOP	D-LOOP	0	1	1	1
93	733	0	A	733	T	0	0	0	0	733	377	356	0	0	0	0	0	0	0	0	0	377	356	0	MT-DLOOP	D-LOOP	0	1	1	1
94	747	0	G	747	A	0	0	0	0	0	0	0	0	0	0	747	382	365	0	0	0	382	365	0	MT-DLOOP	D-LOOP	0	1	1	1
95	717	0	A	716	G	1	1	0	0.14	716	372	344	0	0	0	1	1	0	0	0	0	372	344	0	MT-DLOOP	D-LOOP	0	1	1	1
96	749	0	C	748	T	1	0	1	0.13	0	0	0	748	384	364	0	0	0	1	0	1	384	364	0	MT-DLOOP	D-LOOP	0	1	1	1
97	754	0	G	754	A	0	0	0	0	0	0	0	0	0	0	754	387	367	0	0	0	387	367	0	MT-DLOOP	D-LOOP	0	1	1	1
98	761	0	C	760	T	1	1	0	0.13	0	0	0	760	392	368	0	0	0	1	1	0	392	368	0	MT-DLOOP	D-LOOP	0	1	1	1
99	763	0	T	760	C	3	1	2	0.39	0	0	0	3	1	2	0	0	0	760	400	360	400	360	0	MT-DLOOP	D-LOOP	0	1	1	1
100	778	0	G	777	T	1	0	1	0.13	0	0	0	0	0	0	777	407	370	1	0	1	407	370	0	MT-DLOOP	D-LOOP	0	1	1	1
101	773	0	G	773	A	0	0	0	0	0	0	0	0	0	0	773	407	366	0	0	0	407	366	0	MT-DLOOP	D-LOOP	0	1	1	1
102	742	0	A	740	T	1	0	1	0.13	740	390	350	0	0	0	1	1	0	1	0	1	390	350	0	MT-DLOOP	D-LOOP	0	1	1	1
103	770	0	G	769	T	1	0	1	0.13	0	0	0	0	0	0	769	420	349	1	0	1	420	349	0	MT-DLOOP	D-LOOP	0	1	1	1
104	760	0	C	759	G	1	1	0	0.13	0	0	0	759	404	355	1	1	0	0	0	0	404	355	0	MT-DLOOP	D-LOOP	0	1	1	1
105	766	0	C	765	A	1	1	0	0.13	1	1	0	765	410	355	0	0	0	0	0	0	410	355	0	MT-DLOOP	D-LOOP	0	1	1	1
106	753	0	G	749	A	2	0	2	0.27	2	0	2	0	0	0	749	394	355	2	2	0	394	355	0	MT-DLOOP	D-LOOP	0	1	1	1
107	753	0	G	753	A	0	0	0	0	0	0	0	0	0	0	753	404	349	0	0	0	404	349	0	MT-DLOOP	D-LOOP	0	1	1	1
108	701	0	A	698	C	2	1	1	0.29	698	357	341	2	1	1	1	1	0	0	0	0	357	341	0	MT-DLOOP	D-LOOP	0	1	1	1
109	721	0	G	720	C	1	1	0	0.14	0	0	0	1	1	0	720	402	318	0	0	0	402	318	0	MT-DLOOP	D-LOOP	0	1	1	1
110	702	0	C	701	G	1	0	1	0.14	0	0	0	701	384	317	1	0	1	0	0	0	384	317	0	MT-DLOOP	D-LOOP	0	1	1	1
111	681	0	A	680	G	1	1	0	0.15	680	406	274	0	0	0	1	1	0	0	0	0	406	274	0	MT-DLOOP	D-LOOP	0	1	1	1
112	739	0	C	739	A	0	0	0	0	0	0	0	739	421	318	0	0	0	0	0	0	421	318	0	MT-DLOOP	D-LOOP	0	1	1	1
113	757	0	C	752	A	3	2	1	0.4	3	2	1	752	438	314	0	0	0	2	0	2	438	314	0	MT-DLOOP	D-LOOP	0	1	1	1
114	799	0	C	796	T	3	3	0	0.38	0	0	0	796	457	339	0	0	0	3	3	0	457	339	0	MT-DLOOP	D-LOOP	0	1	1	1
115	777	0	T	777	A	0	0	0	0	0	0	0	0	0	0	0	0	0	777	442	335	442	335	0	MT-DLOOP	D-LOOP	0	1	1	1
116	774	0	A	773	G	1	0	1	0.13	773	439	334	0	0	0	1	0	1	0	0	0	439	334	0	MT-DLOOP	D-LOOP	0	1	1	1
117	789	0	T	789	A	0	0	0	0	0	0	0	0	0	0	0	0	0	789	446	343	446	343	0	MT-DLOOP	D-LOOP	0	1	1	1
118	822	0	G	821	T	1	1	0	0.12	0	0	0	0	0	0	821	475	346	1	1	0	475	346	0	MT-DLOOP	D-LOOP	0	1	1	1
119	809	0	T	806	C	3	2	1	0.37	0	0	0	3	2	1	0	0	0	806	455	351	455	351	0	MT-DLOOP	D-LOOP	0	1	1	1
120	828	0	C	827	T	1	0	1	0.12	0	0	0	827	482	345	0	0	0	1	0	1	482	345	0	MT-DLOOP	D-LOOP	0	1	1	1
121	850	0	G	848	A	2	0	2	0.24	2	0	2	0	0	0	848	503	345	0	0	0	503	345	0	MT-DLOOP	D-LOOP	0	1	1	1
122	859	0	C	859	A	0	0	0	0	0	0	0	859	509	350	0	0	0	0	0	0	509	350	0	MT-DLOOP	D-LOOP	0	1	1	1
123	822	0	A	820	C	1	0	1	0.12	820	473	347	1	0	1	1	1	0	0	0	0	473	347	0	MT-DLOOP	D-LOOP	0	1	1	1
124	846	0	G	846	A	0	0	0	0	0	0	0	0	0	0	846	499	347	0	0	0	499	347	0	MT-DLOOP	D-LOOP	0	1	1	1
125	791	0	T	791	A	0	0	0	0	0	0	0	0	0	0	0	0	0	791	468	323	468	323	0	MT-DLOOP	D-LOOP	0	1	1	1
126	830	0	A	830	T	0	0	0	0	830	505	325	0	0	0	0	0	0	0	0	0	505	325	0	MT-DLOOP	D-LOOP	0	1	1	1
127	842	0	T	842	A	0	0	0	0	0	0	0	0	0	0	0	0	0	842	513	329	513	329	0	MT-DLOOP	D-LOOP	0	1	1	1
128	862	0	C	862	A	0	0	0	0	0	0	0	862	530	332	0	0	0	0	0	0	530	332	0	MT-DLOOP	D-LOOP	0	1	1	1
129	849	0	T	849	A	0	0	0	0	0	0	0	0	0	0	0	0	0	849	517	332	517	332	0	MT-DLOOP	D-LOOP	0	1	1	1
130	868	0	G	867	C	1	1	0	0.12	0	0	0	1	1	0	867	531	336	0	0	0	531	336	0	MT-DLOOP	D-LOOP	0	1	1	1
131	836	0	T	836	A	0	0	0	0	0	0	0	0	0	0	0	0	0	836	499	337	499	337	0	MT-DLOOP	D-LOOP	0	1	1	1
132	907	0	C	907	A	0	0	0	0	0	0	0	907	564	343	0	0	0	0	0	0	564	343	0	MT-DLOOP	D-LOOP	0	1	1	1
133	935	0	T	935	A	0	0	0	0	0	0	0	0	0	0	0	0	0	935	595	340	595	340	0	MT-DLOOP	D-LOOP	0	1	1	1
134	938	0	T	938	A	0	0	0	0	0	0	0	0	0	0	0	0	0	938	598	340	598	340	0	MT-DLOOP	D-LOOP	0	1	1	1
135	937	0	T	936	A	1	0	1	0.11	1	0	1	0	0	0	0	0	0	936	599	337	599	337	0	MT-DLOOP	D-LOOP	0	1	1	1
136	932	0	G	932	A	0	0	0	0	0	0	0	0	0	0	932	592	340	0	0	0	592	340	0	MT-DLOOP	D-LOOP	0	1	1	1
137	910	0	A	910	T	0	0	0	0	910	577	333	0	0	0	0	0	0	0	0	0	577	333	0	MT-DLOOP	D-LOOP	0	1	1	1
138	916	0	T	916	A	0	0	0	0	0	0	0	0	0	0	0	0	0	916	584	332	584	332	0	MT-DLOOP	D-LOOP	0	1	1	1
139	908	0	T	908	A	0	0	0	0	0	0	0	0	0	0	0	0	0	908	584	324	584	324	0	MT-DLOOP	D-LOOP	0	1	1	1
140	912	0	C	912	A	0	0	0	0	0	0	0	912	580	332	0	0	0	0	0	0	580	332	0	MT-DLOOP	D-LOOP	0	1	1	1
141	911	0	C	911	A	0	0	0	0	0	0	0	911	577	334	0	0	0	0	0	0	577	334	0	MT-DLOOP	D-LOOP	0	1	1	1
142	903	0	T	901	C	2	0	2	0.22	0	0	0	2	0	2	0	0	0	901	570	331	570	331	0	MT-DLOOP	D-LOOP	0	1	1	1
143	920	0	G	919	A	1	0	1	0.11	1	0	1	0	0	0	919	580	339	0	0	0	580	339	2	MT-DLOOP	D-LOOP	1	1	1	1
144	844	0	C	842	A	2	0	2	0.24	2	0	2	842	600	242	0	0	0	0	0	0	600	242	6	MT-DLOOP	D-LOOP	1	1	1	1
145	862	0	C	861	A	1	1	0	0.12	1	1	0	861	618	243	0	0	0	0	0	0	618	243	5	MT-DLOOP	D-LOOP	1	1	1	1
146	867	0	C	866	G	1	1	0	0.12	0	0	0	866	620	246	1	1	0	0	0	0	620	246	4	MT-DLOOP	D-LOOP	1	1	1	1
147	878	0	C	877	A	1	1	0	0.11	1	1	0	877	624	253	0	0	0	0	0	0	624	253	3	MT-DLOOP	D-LOOP	1	1	1	1
148	877	0	A	873	G	3	3	0	0.34	873	618	255	0	0	0	3	3	0	1	1	0	618	255	1	MT-DLOOP	D-LOOP	1	1	1	1
149	876	0	T	876	A	0	0	0	0	0	0	0	0	0	0	0	0	0	876	621	255	621	255	0	MT-DLOOP	D-LOOP	0	1	1	1
150	906	0	C	906	A	0	0	0	0	0	0	0	906	628	278	0	0	0	0	0	0	628	278	0	MT-DLOOP	D-LOOP	0	1	1	1
151	927	0	C	927	A	0	0	0	0	0	0	0	927	647	280	0	0	0	0	0	0	647	280	0	MT-DLOOP	D-LOOP	0	1	1	1
152	923	0	T	923	A	0	0	0	0	0	0	0	0	0	0	0	0	0	923	648	275	648	275	0	MT-DLOOP	D-LOOP	0	1	1	1
153	947	0	G	946	T	1	1	0	0.11	0	0	0	0	0	0	946	671	275	1	1	0	671	275	0	MT-DLOOP	D-LOOP	0	1	1	1
154	937	0	T	937	A	0	0	0	0	0	0	0	0	0	0	0	0	0	937	661	276	661	276	0	MT-DLOOP	D-LOOP	0	1	1	1
155	949	0	T	949	A	0	0	0	0	0	0	0	0	0	0	0	0	0	949	670	279	670	279	0	MT-DLOOP	D-LOOP	0	1	1	1
156	1066	0	A	1064	T	2	1	1	0.19	1064	723	341	0	0	0	0	0	0	2	1	1	723	341	0	MT-DLOOP	D-LOOP	0	0	1	1
157	1072	0	T	1071	C	1	0	1	0.09	0	0	0	1	0	1	0	0	0	1071	726	345	726	345	0	MT-DLOOP	D-LOOP	0	0	1	1
158	1083	0	T	1083	A	0	0	0	0	0	0	0	0	0	0	0	0	0	1083	725	358	725	358	0	MT-DLOOP	D-LOOP	0	0	1	1
159	1090	0	T	1090	A	0	0	0	0	0	0	0	0	0	0	0	0	0	1090	724	366	724	366	0	MT-DLOOP	D-LOOP	0	0	1	1
160	1112	0	A	1109	G	2	2	0	0.18	1109	747	362	0	0	0	2	2	0	1	1	0	747	362	0	MT-DLOOP	D-LOOP	0	0	1	1
161	1113	0	T	1111	A	1	1	0	0.09	1	1	0	1	1	0	0	0	0	1111	751	360	751	360	0	MT-DLOOP	D-LOOP	0	0	1	1
162	1140	0	C	1138	A	1	0	1	0.09	1	0	1	1138	770	368	1	1	0	0	0	0	770	368	0	MT-DLOOP	D-LOOP	0	0	1	1
163	1149	0	G	1149	A	0	0	0	0	0	0	0	0	0	0	1149	771	378	0	0	0	771	378	0	MT-DLOOP	D-LOOP	0	0	1	1
164	1189	0	C	1189	A	0	0	0	0	0	0	0	1189	767	422	0	0	0	0	0	0	767	422	0	MT-DLOOP	D-LOOP	0	0	1	1
165	1182	0	A	1175	G	5	4	1	0.42	1175	753	422	0	0	0	5	4	1	2	2	0	753	422	0	MT-DLOOP	D-LOOP	0	0	1	1
166	1229	0	C	1229	A	0	0	0	0	0	0	0	1229	792	437	0	0	0	0	0	0	792	437	0	MT-DLOOP	D-LOOP	0	0	1	1
167	1260	0	C	1260	A	0	0	0	0	0	0	0	1260	822	438	0	0	0	0	0	0	822	438	0	MT-DLOOP	D-LOOP	0	0	1	1
168	1262	0	T	1262	A	0	0	0	0	0	0	0	0	0	0	0	0	0	1262	817	445	817	445	0	MT-DLOOP	D-LOOP	0	0	1	1
169	1287	0	A	1287	T	0	0	0	0	1287	817	470	0	0	0	0	0	0	0	0	0	817	470	0	MT-DLOOP	D-LOOP	0	0	1	1
170	1304	0	C	1304	A	0	0	0	0	0	0	0	1304	817	487	0	0	0	0	0	0	817	487	0	MT-DLOOP	D-LOOP	0	0	1	1
171	1373	0	G	1370	T	2	2	0	0.15	1	1	0	0	0	0	1370	842	528	2	2	0	842	528	0	MT-DLOOP	D-LOOP	0	0	1	1
172	1401	0	T	1401	A	0	0	0	0	0	0	0	0	0	0	0	0	0	1401	840	561	840	561	0	MT-DLOOP	D-LOOP	0	0	1	1
173	1391	0	T	1391	A	0	0	0	0	0	0	0	0	0	0	0	0	0	1391	836	555	836	555	0	MT-DLOOP	D-LOOP	0	0	1	1
174	1407	0	C	1406	T	1	1	0	0.07	0	0	0	1406	840	566	0	0	0	1	1	0	840	566	0	MT-DLOOP	D-LOOP	0	0	1	1
175	1386	0	A	1386	T	0	0	0	0	1386	813	573	0	0	0	0	0	0	0	0	0	813	573	0	MT-DLOOP	D-LOOP	0	0	1	1
176	1351	0	A	1350	T	1	0	1	0.07	1350	777	573	0	0	0	0	0	0	1	0	1	777	573	0	MT-DLOOP	D-LOOP	0	0	1	1
177	1348	0	T	1347	G	1	1	0	0.07	0	0	0	0	0	0	1	1	0	1347	773	574	773	574	0	MT-DLOOP	D-LOOP	0	0	1	1
178	1330	0	A	1330	T	0	0	0	0	1330	755	575	0	0	0	0	0	0	0	0	0	755	575	0	MT-DLOOP	D-LOOP	0	0	1	1
179	1334	0	T	1334	A	0	0	0	0	0	0	0	0	0	0	0	0	0	1334	756	578	756	578	0	MT-DLOOP	D-LOOP	0	0	1	1
180	1330	0	T	1330	A	0	0	0	0	0	0	0	0	0	0	0	0	0	1330	752	578	752	578	0	MT-DLOOP	D-LOOP	0	0	1	1
181	1322	0	A	1321	T	1	1	0	0.08	1321	749	572	0	0	0	0	0	0	1	1	0	749	572	0	MT-DLOOP	D-LOOP	0	0	1	1
182	1327	0	C	1327	A	0	0	0	0	0	0	0	1327	751	576	0	0	0	0	0	0	751	576	0	MT-DLOOP	D-LOOP	0	0	1	1
183	1296	0	A	1296	T	0	0	0	0	1296	746	550	0	0	0	0	0	0	0	0	0	746	550	0	MT-DLOOP	D-LOOP	0	0	1	1
184	1344	0	G	1341	T	2	1	1	0.15	0	0	0	1	0	1	1341	791	550	2	1	1	791	550	0	MT-DLOOP	D-LOOP	0	0	1	1
185	1344	0	G	1343	T	1	0	1	0.07	0	0	0	0	0	0	1343	796	547	1	0	1	796	547	0	MT-DLOOP	D-LOOP	0	0	1	1
186	1367	0	C	1366	A	1	1	0	0.07	1	1	0	1366	810	556	0	0	0	0	0	0	810	556	0	MT-DLOOP	D-LOOP	0	0	1	1
187	1374	0	G	1372	T	2	2	0	0.15	0	0	0	0	0	0	1372	817	555	2	2	0	817	555	0	MT-DLOOP	D-LOOP	0	0	1	1
188	1365	0	A	1363	G	2	1	1	0.15	1363	810	553	0	0	0	2	1	1	0	0	0	810	553	0	MT-DLOOP	D-LOOP	0	0	1	1
189	1376	0	A	1375	G	1	0	1	0.07	1375	818	557	0	0	0	1	0	1	0	0	0	818	557	0	MT-DLOOP	D-LOOP	0	0	1	1
190	1406	0	C	1406	A	0	0	0	0	0	0	0	1406	817	589	0	0	0	0	0	0	817	589	0	MT-DLOOP	D-LOOP	0	0	1	1
191	1425	0	A	1424	G	1	0	1	0.07	1424	813	611	0	0	0	1	0	1	0	0	0	813	611	0	MT-DLOOP	D-LOOP	0	0	1	1
192	1440	0	T	1440	A	0	0	0	0	0	0	0	0	0	0	0	0	0	1440	815	625	815	625	0	MT-DLOOP	D-LOOP	0	0	1	1
193	1525	0	A	1525	T	0	0	0	0	1525	816	709	0	0	0	0	0	0	0	0	0	816	709	0	MT-DLOOP	D-LOOP	0	0	1	1
194	1556	0	C	1554	A	2	1	1	0.13	2	1	1	1554	822	732	0	0	0	0	0	0	822	732	0	MT-DLOOP	D-LOOP	0	0	1	1
195	1593	0	T	1593	A	0	0	0	0	0	0	0	0	0	0	0	0	0	1593	822	771	822	771	0	MT-DLOOP	D-LOOP	0	0	1	1
196	1617	0	T	1616	A	1	0	1	0.06	1	0	1	0	0	0	0	0	0	1616	821	795	821	795	0	MT-DLOOP	D-LOOP	0	0	1	1
197	1622	0	A	1621	T	1	0	1	0.06	1621	820	801	0	0	0	0	0	0	1	0	1	820	801	0	MT-DLOOP	D-LOOP	0	0	1	1
198	1652	0	C	1651	A	1	1	0	0.06	1	1	0	1651	834	817	0	0	0	0	0	0	834	817	0	MT-DLOOP	D-LOOP	0	0	1	1
199	1647	0	T	1647	A	0	0	0	0	0	0	0	0	0	0	0	0	0	1647	824	823	824	823	0	MT-DLOOP	D-LOOP	0	0	1	1
200	1642	0	A	1640	T	1	1	0	0.06	1640	811	829	0	0	0	1	1	0	1	1	0	811	829	0	MT-DLOOP	D-LOOP	0	0	1	1
201	1652	0	A	1652	T	0	0	0	0	1652	820	832	0	0	0	0	0	0	0	0	0	820	832	0	MT-DLOOP	D-LOOP	0	0	1	1
202	1636	0	A	1633	C	2	2	0	0.12	1633	808	825	2	2	0	1	0	1	0	0	0	808	825	8	MT-DLOOP	D-LOOP	1	0	1	1
203	1626	0	G	1625	T	1	0	1	0.06	0	0	0	0	0	0	1625	797	828	1	0	1	797	828	9	MT-DLOOP	D-LOOP	1	0	1	1
204	1643	0	T	1642	C	1	1	0	0.06	0	0	0	1	1	0	0	0	0	1642	766	876	766	876	10	MT-DLOOP	D-LOOP	1	0	1	1
205	1665	0	G	1663	T	2	0	2	0.12	0	0	0	0	0	0	1663	795	868	2	0	2	795	868	11	MT-DLOOP	D-LOOP	1	0	1	1
206	1659	0	T	1659	A	0	0	0	0	0	0	0	0	0	0	0	0	0	1659	774	885	774	885	12	MT-DLOOP	D-LOOP	1	0	1	1
207	1672	0	G	1671	T	1	1	0	0.06	0	0	0	0	0	0	1671	801	870	1	1	0	801	870	13	MT-DLOOP	D-LOOP	1	0	1	1
208	1697	0	T	1697	A	0	0	0	0	0	0	0	0	0	0	0	0	0	1697	796	901	796	901	14	MT-DLOOP	D-LOOP	1	0	1	1
209	1693	0	T	1691	C	2	1	1	0.12	0	0	0	2	1	1	0	0	0	1691	794	897	794	897	7	MT-DLOOP	D-LOOP	1	0	1	1
210	1707	0	A	1705	T	2	0	2	0.12	1705	795	910	0	0	0	0	0	0	2	0	2	795	910	0	MT-DLOOP	D-LOOP	0	0	1	1
211	1720	0	A	1719	C	1	0	1	0.06	1719	804	915	1	0	1	0	0	0	0	0	0	804	915	0	MT-DLOOP	D-LOOP	0	0	1	1
212	1724	0	T	1724	A	0	0	0	0	0	0	0	0	0	0	0	0	0	1724	803	921	803	921	0	MT-DLOOP	D-LOOP	0	0	1	1
213	1708	0	T	1708	A	0	0	0	0	0	0	0	0	0	0	0	0	0	1708	793	915	793	915	0	MT-DLOOP	D-LOOP	0	0	1	1
214	1674	0	A	1674	T	0	0	0	0	1674	779	895	0	0	0	0	0	0	0	0	0	779	895	0	MT-DLOOP	D-LOOP	0	0	1	1
215	1682	0	A	1666	G	16	9	7	0.95	1666	779	887	0	0	0	16	9	7	0	0	0	779	887	0	MT-DLOOP	D-LOOP	0	0	1	0
216	1680	0	T	1680	A	0	0	0	0	0	0	0	0	0	0	0	0	0	1680	788	892	788	892	0	MT-DLOOP	D-LOOP	0	0	1	1
217	1660	0	T	1660	A	0	0	0	0	0	0	0	0	0	0	0	0	0	1660	784	876	784	876	0	MT-DLOOP	D-LOOP	0	0	1	1
218	1639	0	A	1639	T	0	0	0	0	1639	758	881	0	0	0	0	0	0	0	0	0	758	881	0	MT-DLOOP	D-LOOP	0	0	1	1
219	1622	0	A	1621	G	1	0	1	0.06	1621	753	868	0	0	0	1	0	1	0	0	0	753	868	0	MT-DLOOP	D-LOOP	0	0	1	1
220	1594	0	T	1594	A	0	0	0	0	0	0	0	0	0	0	0	0	0	1594	730	864	730	864	0	MT-DLOOP	D-LOOP	0	0	1	1
221	1582	0	G	1581	T	1	0	1	0.06	0	0	0	0	0	0	1581	708	873	1	0	1	708	873	0	MT-DLOOP	D-LOOP	0	0	1	1
222	1584	0	C	1584	A	0	0	0	0	0	0	0	1584	714	870	0	0	0	0	0	0	714	870	0	MT-DLOOP	D-LOOP	0	0	1	1
223	1584	0	T	1583	C	1	1	0	0.06	0	0	0	1	1	0	0	0	0	1583	712	871	712	871	0	MT-DLOOP	D-LOOP	0	0	1	1
224	1563	0	T	1563	A	0	0	0	0	0	0	0	0	0	0	0	0	0	1563	708	855	708	855	0	MT-DLOOP	D-LOOP	0	0	1	1
225	1583	0	G	1581	A	2	1	1	0.13	2	1	1	0	0	0	1581	711	870	0	0	0	711	870	0	MT-DLOOP	D-LOOP	0	0	1	1
226	1566	0	T	1565	A	1	0	1	0.06	1	0	1	0	0	0	0	0	0	1565	705	860	705	860	0	MT-DLOOP	D-LOOP	0	0	1	1
227	1564	0	A	1564	T	0	0	0	0	1564	702	862	0	0	0	0	0	0	0	0	0	702	862	0	MT-DLOOP	D-LOOP	0	0	1	1
228	1554	0	G	1552	T	2	0	2	0.13	0	0	0	0	0	0	1552	695	857	2	0	2	695	857	0	MT-DLOOP	D-LOOP	0	0	1	1
229	1548	0	G	1547	T	1	1	0	0.06	0	0	0	0	0	0	1547	695	852	1	1	0	695	852	0	MT-DLOOP	D-LOOP	0	0	1	1
230	1518	0	A	1518	T	0	0	0	0	1518	679	839	0	0	0	0	0	0	0	0	0	679	839	0	MT-DLOOP	D-LOOP	0	0	1	1
231	1530	0	C	1530	A	0	0	0	0	0	0	0	1530	685	845	0	0	0	0	0	0	685	845	0	MT-DLOOP	D-LOOP	0	0	1	1
232	1493	0	A	1493	T	0	0	0	0	1493	643	850	0	0	0	0	0	0	0	0	0	643	850	0	MT-DLOOP	D-LOOP	0	0	1	1
233	1450	0	T	1450	A	0	0	0	0	0	0	0	0	0	0	0	0	0	1450	610	840	610	840	0	MT-DLOOP	D-LOOP	0	0	1	1
234	1457	0	A	1456	G	1	0	1	0.07	1456	611	845	0	0	0	1	0	1	0	0	0	611	845	0	MT-DLOOP	D-LOOP	0	0	1	1
235	1460	0	G	1459	T	1	0	1	0.07	0	0	0	0	0	0	1459	615	844	1	0	1	615	844	0	MT-DLOOP	D-LOOP	0	0	1	1
236	1448	0	T	1447	A	1	1	0	0.07	1	1	0	0	0	0	0	0	0	1447	604	843	604	843	0	MT-DLOOP	D-LOOP	0	0	1	1
237	1460	0	A	1460	T	0	0	0	0	1460	614	846	0	0	0	0	0	0	0	0	0	614	846	0	MT-DLOOP	D-LOOP	0	0	1	1
238	1460	0	A	1460	T	0	0	0	0	1460	619	841	0	0	0	0	0	0	0	0	0	619	841	0	MT-DLOOP	D-LOOP	0	0	1	1
239	1489	0	T	1489	A	0	0	0	0	0	0	0	0	0	0	0	0	0	1489	652	837	652	837	0	MT-DLOOP	D-LOOP	0	0	1	1
240	1493	0	A	1493	T	0	0	0	0	1493	653	840	0	0	0	0	0	0	0	0	0	653	840	0	MT-DLOOP	D-LOOP	0	0	1	1
241	1478	0	A	1478	T	0	0	0	0	1478	648	830	0	0	0	0	0	0	0	0	0	648	830	0	MT-DLOOP	D-LOOP	0	0	1	1
242	1479	0	C	1479	A	0	0	0	0	0	0	0	1479	649	830	0	0	0	0	0	0	649	830	0	MT-DLOOP	D-LOOP	0	0	1	1
243	1457	0	A	1457	T	0	0	0	0	1457	637	820	0	0	0	0	0	0	0	0	0	637	820	0	MT-DLOOP	D-LOOP	0	0	1	1
244	1435	0	A	1435	T	0	0	0	0	1435	616	819	0	0	0	0	0	0	0	0	0	616	819	0	MT-DLOOP	D-LOOP	0	0	1	1
245	1420	0	T	1420	A	0	0	0	0	0	0	0	0	0	0	0	0	0	1420	604	816	604	816	0	MT-DLOOP	D-LOOP	0	0	1	1
246	1396	0	T	1396	A	0	0	0	0	0	0	0	0	0	0	0	0	0	1396	593	803	593	803	0	MT-DLOOP	D-LOOP	0	0	1	1
247	1384	0	G	1384	A	0	0	0	0	0	0	0	0	0	0	1384	580	804	0	0	0	580	804	0	MT-DLOOP	D-LOOP	0	0	1	1
248	1381	0	A	1381	T	0	0	0	0	1381	576	805	0	0	0	0	0	0	0	0	0	576	805	0	MT-DLOOP	D-LOOP	0	0	1	1
249	1372	0	A	1371	G	1	1	0	0.07	1371	571	800	0	0	0	1	1	0	0	0	0	571	800	0	MT-DLOOP	D-LOOP	0	0	1	1
250	1352	0	T	1346	A	4	4	0	0.3	4	4	0	2	2	0	0	0	0	1346	565	781	565	781	0	MT-DLOOP	D-LOOP	0	0	1	1
251	1339	0	G	1338	T	1	1	0	0.07	0	0	0	0	0	0	1338	562	776	1	1	0	562	776	0	MT-DLOOP	D-LOOP	0	0	1	1
252	1322	1	T	1320	A	1	1	0	0.08	1	1	0	1	0	1	0	0	0	1320	550	770	550	770	0	MT-DLOOP	D-LOOP	0	0	1	1
253	1331	0	C	1329	T	2	2	0	0.15	0	0	0	1329	551	778	0	0	0	2	2	0	551	778	0	MT-DLOOP	D-LOOP	0	0	1	1
254	1339	0	T	1335	C	2	2	0	0.15	0	0	0	2	2	0	2	1	1	1335	567	768	567	768	0	MT-DLOOP	D-LOOP	0	0	1	1
255	1343	0	G	1343	A	0	0	0	0	0	0	0	0	0	0	1343	575	768	0	0	0	575	768	0	MT-DLOOP	D-LOOP	0	0	1	1
256	1227	0	C	1225	A	2	1	1	0.16	2	1	1	1225	524	701	0	0	0	0	0	0	524	701	0	MT-DLOOP	D-LOOP	0	0	1	1
257	1196	0	A	1193	G	2	1	1	0.17	1193	522	671	0	0	0	2	1	1	1	1	0	522	671	0	MT-DLOOP	D-LOOP	0	0	1	1
258	1233	0	C	1231	A	2	2	0	0.16	2	2	0	1231	540	691	0	0	0	0	0	0	540	691	0	MT-DLOOP	D-LOOP	0	0	1	1
259	1247	0	A	1227	T	8	8	0	0.64	1227	545	682	8	8	0	4	3	1	8	8	0	545	682	0	MT-DLOOP	D-LOOP	0	0	1	1
260	1277	0	G	1268	T	7	6	1	0.55	1	1	0	1	0	1	1268	589	679	7	6	1	589	679	0	MT-DLOOP	D-LOOP	0	0	1	1
261	1380	0	C	1379	A	1	0	1	0.07	1	0	1	1379	704	675	0	0	0	0	0	0	704	675	0	MT-DLOOP	D-LOOP	0	0	1	1
262	1360	0	C	1356	A	4	1	3	0.29	4	1	3	1356	690	666	0	0	0	0	0	0	690	666	0	MT-DLOOP	D-LOOP	0	0	1	1
263	1350	0	G	1347	A	1	1	0	0.07	1	1	0	1	0	1	1347	692	655	1	0	1	692	655	0	MT-DLOOP	D-LOOP	0	0	1	1
264	1293	0	C	1291	A	1	1	0	0.08	1	1	0	1291	685	606	1	1	0	0	0	0	685	606	0	MT-DLOOP	D-LOOP	0	0	1	1
265	1294	0	T	1293	A	1	1	0	0.08	1	1	0	0	0	0	0	0	0	1293	689	604	689	604	0	MT-DLOOP	D-LOOP	0	0	1	1
266	1263	0	T	1262	A	1	1	0	0.08	1	1	0	0	0	0	0	0	0	1262	666	596	666	596	0	MT-DLOOP	D-LOOP	0	0	1	1
267	1233	0	T	1228	C	2	2	0	0.16	1	1	0	2	2	0	2	2	0	1228	644	584	644	584	0	MT-DLOOP	D-LOOP	0	0	1	1
268	1245	0	C	1245	A	0	0	0	0	0	0	0	1245	645	600	0	0	0	0	0	0	645	600	8	MT-DLOOP	D-LOOP	1	0	1	1
269	1253	0	C	1252	T	1	1	0	0.08	0	0	0	1252	647	605	0	0	0	1	1	0	647	605	9	MT-DLOOP	D-LOOP	1	0	1	1
270	1226	0	A	1225	C	1	0	1	0.08	1225	648	577	1	0	1	0	0	0	0	0	0	648	577	10	MT-DLOOP	D-LOOP	1	0	1	1
271	1171	0	C	1168	A	2	1	1	0.17	2	1	1	1168	618	550	0	0	0	1	1	0	618	550	11	MT-DLOOP	D-LOOP	1	0	1	1
272	1143	0	A	1143	T	0	0	0	0	1143	619	524	0	0	0	0	0	0	0	0	0	619	524	12	MT-DLOOP	D-LOOP	1	0	1	1
273	1167	0	C	1166	T	1	0	1	0.09	0	0	0	1166	625	541	0	0	0	1	0	1	625	541	13	MT-DLOOP	D-LOOP	1	0	1	1
274	1165	0	A	1164	G	1	0	1	0.09	1164	620	544	0	0	0	1	0	1	0	0	0	620	544	14	MT-DLOOP	D-LOOP	1	0	1	1
275	1160	0	G	1159	T	1	1	0	0.09	0	0	0	0	0	0	1159	621	538	1	1	0	621	538	7	MT-DLOOP	D-LOOP	1	0	1	1
276	1158	0	A	1156	G	2	0	2	0.17	1156	617	539	0	0	0	2	0	2	0	0	0	617	539	0	MT-DLOOP	D-LOOP	0	0	1	1
277	1185	0	C	1184	T	1	0	1	0.08	0	0	0	1184	625	559	0	0	0	1	0	1	625	559	0	MT-DLOOP	D-LOOP	0	0	1	1
278	1212	0	A	1212	T	0	0	0	0	1212	628	584	0	0	0	0	0	0	0	0	0	628	584	0	MT-DLOOP	D-LOOP	0	0	1	1
279	1162	0	T	1162	A	0	0	0	0	0	0	0	0	0	0	0	0	0	1162	624	538	624	538	0	MT-DLOOP	D-LOOP	0	0	1	1
280	1216	0	C	1215	A	1	1	0	0.08	1	1	0	1215	623	592	0	0	0	0	0	0	623	592	0	MT-DLOOP	D-LOOP	0	0	1	1
281	1217	0	A	1217	T	0	0	0	0	1217	621	596	0	0	0	0	0	0	0	0	0	621	596	0	MT-DLOOP	D-LOOP	0	0	1	1
282	1187	0	T	1185	A	2	0	2	0.17	2	0	2	0	0	0	0	0	0	1185	620	565	620	565	0	MT-DLOOP	D-LOOP	0	0	1	1
283	1295	0	A	1294	C	1	0	1	0.08	1294	618	676	1	0	1	0	0	0	0	0	0	618	676	0	MT-DLOOP	D-LOOP	0	0	1	1
284	1212	0	A	1211	G	1	0	1	0.08	1211	577	634	0	0	0	1	0	1	0	0	0	577	634	0	MT-DLOOP	D-LOOP	0	0	1	1
285	1207	0	C	1207	A	0	0	0	0	0	0	0	1207	576	631	0	0	0	0	0	0	576	631	2	MT-DLOOP	D-LOOP	1	0	1	1
286	1235	7	A	1235	T	0	0	0	0	1235	555	680	0	0	0	0	0	0	0	0	0	555	680	2	MT-DLOOP	D-LOOP	1	0	1	1
287	1231	0	A	1231	T	0	0	0	0	1231	549	682	0	0	0	0	0	0	0	0	0	549	682	2	MT-DLOOP	D-LOOP	1	0	1	1
288	1228	0	A	1228	T	0	0	0	0	1228	546	682	0	0	0	0	0	0	0	0	0	546	682	4	MT-DLOOP	D-LOOP	1	0	1	1
289	1239	0	A	1239	T	0	0	0	0	1239	546	693	0	0	0	0	0	0	0	0	0	546	693	3	MT-DLOOP	D-LOOP	1	0	1	1
290	1194	0	A	1194	T	0	0	0	0	1194	544	650	0	0	0	0	0	0	0	0	0	544	650	1	MT-DLOOP	D-LOOP	1	0	1	1
291	1105	0	A	1104	T	1	0	1	0.09	1104	541	563	0	0	0	0	0	0	1	0	1	541	563	1	MT-DLOOP	D-LOOP	1	0	1	1
292	1131	3	T	1124	A	6	0	6	0.53	6	0	6	1	0	1	0	0	0	1124	542	582	542	582	1	MT-DLOOP	D-LOOP	1	0	1	1
293	973	0	T	973	A	0	0	0	0	0	0	0	0	0	0	0	0	0	973	540	433	540	433	0	MT-DLOOP	D-LOOP	0	1	1	1
294	882	0	T	881	C	1	1	0	0.11	0	0	0	1	1	0	0	0	0	881	533	348	533	348	0	MT-DLOOP	D-LOOP	0	1	1	1
295	991	0	C	918	T	73	44	29	7.37	0	0	0	918	491	427	0	0	0	73	44	29	491	427	0	MT-DLOOP	D-LOOP	0	1	0	0
296	895	0	C	886	T	8	4	4	0.89	1	1	0	886	528	358	0	0	0	8	4	4	528	358	0	MT-DLOOP	D-LOOP	0	1	1	1
297	709	0	A	708	G	1	1	0	0.14	708	531	177	0	0	0	1	1	0	0	0	0	531	177	0	MT-DLOOP	D-LOOP	0	1	1	1
298	935	0	C	935	A	0	0	0	0	0	0	0	935	512	423	0	0	0	0	0	0	512	423	0	MT-DLOOP	D-LOOP	0	1	1	1
299	887	0	C	887	A	0	0	0	0	0	0	0	887	512	375	0	0	0	0	0	0	512	375	0	MT-DLOOP	D-LOOP	0	1	1	1
300	867	1	A	867	T	0	0	0	0	867	506	361	0	0	0	0	0	0	0	0	0	506	361	0	MT-DLOOP	D-LOOP	0	1	1	1
301	658	0	A	657	C	1	1	0	0.15	657	505	152	1	1	0	0	0	0	0	0	0	505	152	0	MT-DLOOP	D-LOOP	0	1	1	1
302	782	193	A	603	C	178	0	178	22.76	603	504	99	178	0	178	1	0	1	0	0	0	504	99	2	MT-DLOOP	D-LOOP	1	1	1	1
303	916	574	C	913	A	3	1	2	0.33	3	1	2	913	499	414	0	0	0	0	0	0	499	414	2	MT-DLOOP	D-LOOP	1	1	1	1
304	846	1	C	846	A	0	0	0	0	0	0	0	846	492	354	0	0	0	0	0	0	492	354	2	MT-DLOOP	D-LOOP	1	1	1	1
305	849	2	C	848	G	1	0	1	0.12	0	0	0	848	501	347	1	0	1	0	0	0	501	347	2	MT-DLOOP	D-LOOP	1	1	1	1
306	850	0	C	850	A	0	0	0	0	0	0	0	850	499	351	0	0	0	0	0	0	499	351	3	MT-DLOOP	D-LOOP	1	1	1	1
307	836	3	C	836	A	0	0	0	0	0	0	0	836	494	342	0	0	0	0	0	0	494	342	1	MT-DLOOP	D-LOOP	1	1	1	1
308	806	1	C	804	A	2	1	1	0.25	2	1	1	804	489	315	0	0	0	0	0	0	489	315	1	MT-DLOOP	D-LOOP	1	1	1	1
309	684	1	C	678	T	4	4	0	0.58	1	1	0	678	483	195	1	1	0	4	4	0	483	195	1	MT-DLOOP	D-LOOP	1	1	1	1
310	489	2	T	421	C	67	35	32	13.7	1	1	0	67	35	32	0	0	0	421	407	14	407	14	1	MT-DLOOP	D-LOOP	1	1	0	0
311	784	731	C	770	T	14	10	4	1.79	0	0	0	770	455	315	0	0	0	14	10	4	455	315	2	MT-DLOOP	D-LOOP	1	1	1	1
312	796	1	C	795	G	1	1	0	0.13	0	0	0	795	475	320	1	1	0	0	0	0	475	320	5	MT-DLOOP	D-LOOP	1	1	1	1
313	798	0	C	798	A	0	0	0	0	0	0	0	798	479	319	0	0	0	0	0	0	479	319	4	MT-DLOOP	D-LOOP	1	1	1	1
314	797	1	C	796	A	1	1	0	0.13	1	1	0	796	480	316	0	0	0	0	0	0	480	316	3	MT-DLOOP	D-LOOP	1	1	1	1
315	782	2	C	781	T	1	1	0	0.13	0	0	0	781	467	314	0	0	0	1	1	0	467	314	1	MT-DLOOP	D-LOOP	1	1	1	1
316	591	0	G	584	C	5	3	2	0.85	0	0	0	5	3	2	584	275	309	2	1	1	275	309	1	MT-DLOOP	D-LOOP	1	1	1	1
317	732	0	C	732	A	0	0	0	0	0	0	0	732	417	315	0	0	0	0	0	0	417	315	0	MT-DLOOP	D-LOOP	0	1	1	1
318	603	0	T	602	C	1	1	0	0.17	0	0	0	1	1	0	0	0	0	602	288	314	288	314	0	MT-DLOOP	D-LOOP	0	1	1	1
319	646	0	T	646	A	0	0	0	0	0	0	0	0	0	0	0	0	0	646	332	314	332	314	0	MT-DLOOP	D-LOOP	0	1	1	1
320	722	0	C	722	A	0	0	0	0	0	0	0	722	405	317	0	0	0	0	0	0	405	317	0	MT-DLOOP	D-LOOP	0	1	1	1
321	711	0	T	711	A	0	0	0	0	0	0	0	0	0	0	0	0	0	711	394	317	394	317	0	MT-DLOOP	D-LOOP	0	1	1	1
322	709	0	G	706	T	3	1	2	0.42	0	0	0	0	0	0	706	389	317	3	1	2	389	317	0	MT-DLOOP	D-LOOP	0	1	1	1
323	735	0	G	735	A	0	0	0	0	0	0	0	0	0	0	735	420	315	0	0	0	420	315	0	MT-DLOOP	D-LOOP	0	1	1	1
324	776	0	C	773	A	2	1	1	0.26	2	1	1	773	455	318	1	0	1	0	0	0	455	318	0	MT-DLOOP	D-LOOP	0	1	1	1
325	788	0	C	787	A	1	0	1	0.13	1	0	1	787	464	323	0	0	0	0	0	0	464	323	0	MT-DLOOP	D-LOOP	0	1	1	1
326	739	0	A	739	T	0	0	0	0	739	419	320	0	0	0	0	0	0	0	0	0	419	320	0	MT-DLOOP	D-LOOP	0	1	1	1
327	766	0	C	766	A	0	0	0	0	0	0	0	766	443	323	0	0	0	0	0	0	443	323	0	MT-DLOOP	D-LOOP	0	1	1	1
328	708	0	A	708	T	0	0	0	0	708	384	324	0	0	0	0	0	0	0	0	0	384	324	0	MT-DLOOP	D-LOOP	0	1	1	1
329	717	0	G	717	A	0	0	0	0	0	0	0	0	0	0	717	393	324	0	0	0	393	324	0	MT-DLOOP	D-LOOP	0	1	1	1
330	770	0	C	770	A	0	0	0	0	0	0	0	770	442	328	0	0	0	0	0	0	442	328	0	MT-DLOOP	D-LOOP	0	1	1	1
331	728	0	A	728	T	0	0	0	0	728	407	321	0	0	0	0	0	0	0	0	0	407	321	0	MT-DLOOP	D-LOOP	0	1	1	1
332	765	0	C	765	A	0	0	0	0	0	0	0	765	434	331	0	0	0	0	0	0	434	331	0	MT-DLOOP	D-LOOP	0	1	1	1
333	710	0	T	710	A	0	0	0	0	0	0	0	0	0	0	0	0	0	710	375	335	375	335	0	MT-DLOOP	D-LOOP	0	1	1	1
334	756	0	T	756	A	0	0	0	0	0	0	0	0	0	0	0	0	0	756	412	344	412	344	0	MT-DLOOP	D-LOOP	0	1	1	1
335	762	0	A	761	G	1	0	1	0.13	761	415	346	0	0	0	1	0	1	0	0	0	415	346	0	MT-DLOOP	D-LOOP	0	1	1	1
336	785	0	A	785	T	0	0	0	0	785	437	348	0	0	0	0	0	0	0	0	0	437	348	0	MT-DLOOP	D-LOOP	0	1	1	1
337	758	0	A	758	T	0	0	0	0	758	412	346	0	0	0	0	0	0	0	0	0	412	346	0	MT-DLOOP	D-LOOP	0	1	1	1
338	748	0	C	747	A	1	0	1	0.13	1	0	1	747	401	346	0	0	0	0	0	0	401	346	0	MT-DLOOP	D-LOOP	0	1	1	1
339	704	0	A	704	T	0	0	0	0	704	369	335	0	0	0	0	0	0	0	0	0	369	335	0	MT-DLOOP	D-LOOP	0	1	1	1
340	724	0	C	724	A	0	0	0	0	0	0	0	724	376	348	0	0	0	0	0	0	376	348	0	MT-DLOOP	D-LOOP	0	1	1	1
341	693	0	A	693	T	0	0	0	0	693	346	347	0	0	0	0	0	0	0	0	0	346	347	0	MT-DLOOP	D-LOOP	0	1	1	1
342	664	0	T	664	A	0	0	0	0	0	0	0	0	0	0	0	0	0	664	326	338	326	338	0	MT-DLOOP	D-LOOP	0	1	1	1
343	735	0	C	735	A	0	0	0	0	0	0	0	735	385	350	0	0	0	0	0	0	385	350	0	MT-DLOOP	D-LOOP	0	1	1	1
344	689	0	T	689	A	0	0	0	0	0	0	0	0	0	0	0	0	0	689	348	341	348	341	0	MT-DLOOP	D-LOOP	0	1	1	1
345	738	0	C	738	A	0	0	0	0	0	0	0	738	387	351	0	0	0	0	0	0	387	351	0	MT-DLOOP	D-LOOP	0	1	1	1
346	695	0	T	695	A	0	0	0	0	0	0	0	0	0	0	0	0	0	695	344	351	344	351	0	MT-DLOOP	D-LOOP	0	1	1	1
347	676	0	G	676	A	0	0	0	0	0	0	0	0	0	0	676	325	351	0	0	0	325	351	0	MT-DLOOP	D-LOOP	0	1	1	1
348	745	0	C	745	A	0	0	0	0	0	0	0	745	395	350	0	0	0	0	0	0	395	350	0	MT-DLOOP	D-LOOP	0	1	1	1
349	750	0	C	750	A	0	0	0	0	0	0	0	750	401	349	0	0	0	0	0	0	401	349	0	MT-DLOOP	D-LOOP	0	1	1	1
350	680	0	A	679	C	1	1	0	0.15	679	331	348	1	1	0	0	0	0	0	0	0	331	348	0	MT-DLOOP	D-LOOP	0	1	1	1
351	687	0	A	687	T	0	0	0	0	687	340	347	0	0	0	0	0	0	0	0	0	340	347	0	MT-DLOOP	D-LOOP	0	1	1	1
352	694	0	A	694	T	0	0	0	0	694	351	343	0	0	0	0	0	0	0	0	0	351	343	2	MT-DLOOP	D-LOOP	1	1	1	1
353	692	0	C	692	A	0	0	0	0	0	0	0	692	341	351	0	0	0	0	0	0	341	351	6	MT-DLOOP	D-LOOP	1	1	1	1
354	683	0	C	683	A	0	0	0	0	0	0	0	683	332	351	0	0	0	0	0	0	332	351	5	MT-DLOOP	D-LOOP	1	1	1	1
355	693	0	C	691	A	2	0	2	0.29	2	0	2	691	341	350	0	0	0	0	0	0	341	350	4	MT-DLOOP	D-LOOP	1	1	1	1
356	690	0	C	690	A	0	0	0	0	0	0	0	690	336	354	0	0	0	0	0	0	336	354	2	MT-DLOOP	D-LOOP	1	1	1	1
357	622	0	A	622	T	0	0	0	0	622	262	360	0	0	0	0	0	0	0	0	0	262	360	2	MT-DLOOP	D-LOOP	1	1	1	1
358	610	0	A	608	G	2	0	2	0.33	608	231	377	0	0	0	2	0	2	0	0	0	231	377	5	MT-DLOOP	D-LOOP	1	1	1	1
359	527	0	A	526	G	1	0	1	0.19	526	146	380	0	0	0	1	0	1	0	0	0	146	380	4	MT-DLOOP	D-LOOP	1	1	1	1
360	526	0	A	523	C	2	0	2	0.38	523	144	379	2	0	2	0	0	0	1	0	1	144	379	3	MT-DLOOP	D-LOOP	1	1	1	1
361	521	0	A	519	T	1	0	1	0.19	519	141	378	1	0	1	0	0	0	1	0	1	141	378	1	MT-DLOOP	D-LOOP	1	1	1	1
362	506	0	C	505	T	1	0	1	0.2	0	0	0	505	125	380	0	0	0	1	0	1	125	380	1	MT-DLOOP	D-LOOP	1	1	1	1
363	494	0	A	494	T	0	0	0	0	494	125	369	0	0	0	0	0	0	0	0	0	125	369	0	MT-DLOOP	D-LOOP	0	1	1	1
364	494	0	A	494	T	0	0	0	0	494	123	371	0	0	0	0	0	0	0	0	0	123	371	0	MT-DLOOP	D-LOOP	0	1	1	1
365	491	0	A	491	T	0	0	0	0	491	116	375	0	0	0	0	0	0	0	0	0	116	375	0	MT-DLOOP	D-LOOP	0	1	1	1
366	460	0	G	460	A	0	0	0	0	0	0	0	0	0	0	460	107	353	0	0	0	107	353	0	MT-DLOOP	D-LOOP	0	1	1	1
367	425	0	A	425	T	0	0	0	0	425	108	317	0	0	0	0	0	0	0	0	0	108	317	0	MT-DLOOP	D-LOOP	0	1	1	1
368	423	0	A	423	T	0	0	0	0	423	112	311	0	0	0	0	0	0	0	0	0	112	311	0	MT-DLOOP	D-LOOP	0	1	1	1
369	432	0	C	432	A	0	0	0	0	0	0	0	432	108	324	0	0	0	0	0	0	108	324	0	MT-DLOOP	D-LOOP	0	1	1	1
370	415	0	C	415	A	0	0	0	0	0	0	0	415	109	306	0	0	0	0	0	0	109	306	0	MT-DLOOP	D-LOOP	0	1	1	1
371	413	0	C	413	A	0	0	0	0	0	0	0	413	112	301	0	0	0	0	0	0	112	301	0	MT-DLOOP	D-LOOP	0	1	1	1
372	394	0	T	394	A	0	0	0	0	0	0	0	0	0	0	0	0	0	394	108	286	108	286	0	MT-DLOOP	D-LOOP	0	1	1	1
373	395	0	A	395	T	0	0	0	0	395	109	286	0	0	0	0	0	0	0	0	0	109	286	0	MT-DLOOP	D-LOOP	0	1	1	1
374	366	0	A	366	T	0	0	0	0	366	111	255	0	0	0	0	0	0	0	0	0	111	255	0	MT-DLOOP	D-LOOP	0	1	1	1
375	365	0	C	365	A	0	0	0	0	0	0	0	365	112	253	0	0	0	0	0	0	112	253	0	MT-DLOOP	D-LOOP	0	1	1	1
376	309	0	A	309	T	0	0	0	0	309	108	201	0	0	0	0	0	0	0	0	0	108	201	0	MT-DLOOP	D-LOOP	0	1	1	1
377	326	0	C	326	A	0	0	0	0	0	0	0	326	108	218	0	0	0	0	0	0	108	218	0	MT-DLOOP	D-LOOP	0	1	1	1
378	326	0	C	325	A	1	1	0	0.31	1	1	0	325	108	217	0	0	0	0	0	0	108	217	0	MT-DLOOP	D-LOOP	0	1	1	1
379	325	0	A	325	T	0	0	0	0	325	108	217	0	0	0	0	0	0	0	0	0	108	217	0	MT-DLOOP	D-LOOP	0	1	1	1
380	316	0	G	314	T	2	0	2	0.63	0	0	0	0	0	0	314	108	206	2	0	2	108	206	0	MT-DLOOP	D-LOOP	0	1	1	1
381	248	0	C	248	A	0	0	0	0	0	0	0	248	110	138	0	0	0	0	0	0	110	138	0	MT-DLOOP	D-LOOP	0	1	1	1
382	241	0	C	241	A	0	0	0	0	0	0	0	241	110	131	0	0	0	0	0	0	110	131	0	MT-DLOOP	D-LOOP	0	1	1	1
383	232	0	T	232	A	0	0	0	0	0	0	0	0	0	0	0	0	0	232	108	124	108	124	0	MT-DLOOP	D-LOOP	0	1	1	1
384	234	0	A	234	T	0	0	0	0	234	107	127	0	0	0	0	0	0	0	0	0	107	127	0	MT-DLOOP	D-LOOP	0	1	1	1
385	237	0	A	237	T	0	0	0	0	237	108	129	0	0	0	0	0	0	0	0	0	108	129	0	MT-DLOOP	D-LOOP	0	1	1	1
386	243	0	C	243	A	0	0	0	0	0	0	0	243	115	128	0	0	0	0	0	0	115	128	0	MT-DLOOP	D-LOOP	0	1	1	1
387	232	0	C	232	A	0	0	0	0	0	0	0	232	124	108	0	0	0	0	0	0	124	108	0	MT-DLOOP	D-LOOP	0	1	1	1
388	228	0	A	228	T	0	0	0	0	228	124	104	0	0	0	0	0	0	0	0	0	124	104	0	MT-DLOOP	D-LOOP	0	1	1	1
389	227	0	G	227	A	0	0	0	0	0	0	0	0	0	0	227	124	103	0	0	0	124	103	0	MT-DLOOP	D-LOOP	0	1	1	1
390	221	0	A	221	T	0	0	0	0	221	122	99	0	0	0	0	0	0	0	0	0	122	99	0	MT-DLOOP	D-LOOP	0	1	1	1
391	222	0	T	222	A	0	0	0	0	0	0	0	0	0	0	0	0	0	222	122	100	122	100	0	MT-DLOOP	D-LOOP	0	1	1	1
392	228	0	T	227	G	1	1	0	0.44	0	0	0	0	0	0	1	1	0	227	126	101	126	101	0	MT-DLOOP	D-LOOP	0	1	1	1
393	229	0	T	228	G	1	1	0	0.44	0	0	0	0	0	0	1	1	0	228	127	101	127	101	0	MT-DLOOP	D-LOOP	0	1	1	1
394	234	0	C	233	A	1	0	1	0.43	1	0	1	233	133	100	0	0	0	0	0	0	133	100	0	MT-DLOOP	D-LOOP	0	1	1	1
395	241	0	A	241	T	0	0	0	0	241	133	108	0	0	0	0	0	0	0	0	0	133	108	0	MT-DLOOP	D-LOOP	0	1	1	1
396	239	0	A	239	T	0	0	0	0	239	133	106	0	0	0	0	0	0	0	0	0	133	106	0	MT-DLOOP	D-LOOP	0	1	1	1
397	239	0	A	239	T	0	0	0	0	239	134	105	0	0	0	0	0	0	0	0	0	134	105	2	MT-DLOOP	D-LOOP	1	1	1	1
398	242	0	T	242	A	0	0	0	0	0	0	0	0	0	0	0	0	0	242	136	106	136	106	6	MT-DLOOP	D-LOOP	1	1	1	1
399	246	0	T	246	A	0	0	0	0	0	0	0	0	0	0	0	0	0	246	137	109	137	109	5	MT-DLOOP	D-LOOP	1	1	1	1
400	249	0	T	248	C	1	0	1	0.4	0	0	0	1	0	1	0	0	0	248	137	111	137	111	4	MT-DLOOP	D-LOOP	1	1	1	1
401	250	0	T	249	G	1	0	1	0.4	0	0	0	0	0	0	1	0	1	249	136	113	136	113	3	MT-DLOOP	D-LOOP	1	1	1	1
402	255	0	A	255	T	0	0	0	0	255	138	117	0	0	0	0	0	0	0	0	0	138	117	1	MT-DLOOP	D-LOOP	1	1	1	1
403	255	0	T	255	A	0	0	0	0	0	0	0	0	0	0	0	0	0	255	138	117	138	117	0	MT-DLOOP	D-LOOP	0	1	1	1
404	255	0	C	255	A	0	0	0	0	0	0	0	255	138	117	0	0	0	0	0	0	138	117	2	MT-DLOOP	D-LOOP	1	1	1	1
405	253	0	T	253	A	0	0	0	0	0	0	0	0	0	0	0	0	0	253	134	119	134	119	6	MT-DLOOP	D-LOOP	1	1	1	1
406	252	0	T	252	A	0	0	0	0	0	0	0	0	0	0	0	0	0	252	134	118	134	118	5	MT-DLOOP	D-LOOP	1	1	1	1
407	251	0	T	251	A	0	0	0	0	0	0	0	0	0	0	0	0	0	251	134	117	134	117	4	MT-DLOOP	D-LOOP	1	1	1	1
408	253	0	T	253	A	0	0	0	0	0	0	0	0	0	0	0	0	0	253	134	119	134	119	3	MT-DLOOP	D-LOOP	1	1	1	1
409	250	0	G	249	A	1	1	0	0.4	1	1	0	0	0	0	249	131	118	0	0	0	131	118	1	MT-DLOOP	D-LOOP	1	1	1	1
410	251	0	G	250	T	1	0	1	0.4	0	0	0	0	0	0	250	131	119	1	0	1	131	119	0	MT-DLOOP	D-LOOP	0	1	1	1
411	249	0	C	249	A	0	0	0	0	0	0	0	249	131	118	0	0	0	0	0	0	131	118	0	MT-DLOOP	D-LOOP	0	1	1	1
412	252	0	G	252	A	0	0	0	0	0	0	0	0	0	0	252	128	124	0	0	0	128	124	0	MT-DLOOP	D-LOOP	0	1	1	1
413	243	0	G	243	A	0	0	0	0	0	0	0	0	0	0	243	121	122	0	0	0	121	122	0	MT-DLOOP	D-LOOP	0	1	1	1
414	245	0	T	245	A	0	0	0	0	0	0	0	0	0	0	0	0	0	245	115	130	115	130	0	MT-DLOOP	D-LOOP	0	1	1	1
415	249	0	A	248	C	1	0	1	0.4	248	117	131	1	0	1	0	0	0	0	0	0	117	131	0	MT-DLOOP	D-LOOP	0	1	1	1
416	255	0	T	255	A	0	0	0	0	0	0	0	0	0	0	0	0	0	255	124	131	124	131	0	MT-DLOOP	D-LOOP	0	1	1	1
417	262	0	G	262	A	0	0	0	0	0	0	0	0	0	0	262	129	133	0	0	0	129	133	0	MT-DLOOP	D-LOOP	0	1	1	1
418	263	0	C	263	A	0	0	0	0	0	0	0	263	130	133	0	0	0	0	0	0	130	133	0	MT-DLOOP	D-LOOP	0	1	1	1
419	249	0	A	248	C	1	1	0	0.4	248	132	116	1	1	0	0	0	0	0	0	0	132	116	0	MT-DLOOP	D-LOOP	0	1	1	1
420	264	0	C	263	T	1	1	0	0.38	0	0	0	263	130	133	0	0	0	1	1	0	130	133	2	MT-DLOOP	D-LOOP	1	1	1	1
421	271	0	T	270	C	1	1	0	0.37	0	0	0	1	1	0	0	0	0	270	136	134	136	134	6	MT-DLOOP	D-LOOP	1	1	1	1
422	271	0	T	271	A	0	0	0	0	0	0	0	0	0	0	0	0	0	271	137	134	137	134	5	MT-DLOOP	D-LOOP	1	1	1	1
423	268	0	T	268	A	0	0	0	0	0	0	0	0	0	0	0	0	0	268	136	132	136	132	4	MT-DLOOP	D-LOOP	1	1	1	1
424	269	0	T	269	A	0	0	0	0	0	0	0	0	0	0	0	0	0	269	135	134	135	134	3	MT-DLOOP	D-LOOP	1	1	1	1
425	268	0	A	268	T	0	0	0	0	268	132	136	0	0	0	0	0	0	0	0	0	132	136	1	MT-DLOOP	D-LOOP	1	1	1	1
426	266	0	A	266	T	0	0	0	0	266	132	134	0	0	0	0	0	0	0	0	0	132	134	0	MT-DLOOP	D-LOOP	0	1	1	1
427	266	0	C	266	A	0	0	0	0	0	0	0	266	127	139	0	0	0	0	0	0	127	139	0	MT-DLOOP	D-LOOP	0	1	1	1
428	265	0	A	265	T	0	0	0	0	265	126	139	0	0	0	0	0	0	0	0	0	126	139	0	MT-DLOOP	D-LOOP	0	1	1	1
429	260	0	G	260	A	0	0	0	0	0	0	0	0	0	0	260	124	136	0	0	0	124	136	0	MT-DLOOP	D-LOOP	0	1	1	1
430	249	0	T	248	C	1	0	1	0.4	0	0	0	1	0	1	0	0	0	248	124	124	124	124	0	MT-DLOOP	D-LOOP	0	1	1	1
431	229	0	C	229	A	0	0	0	0	0	0	0	229	125	104	0	0	0	0	0	0	125	104	0	MT-DLOOP	D-LOOP	0	1	1	1
432	153	0	A	153	T	0	0	0	0	153	119	34	0	0	0	0	0	0	0	0	0	119	34	2	MT-DLOOP	D-LOOP	1	1	1	1
433	252	0	C	252	A	0	0	0	0	0	0	0	252	118	134	0	0	0	0	0	0	118	134	2	MT-DLOOP	D-LOOP	1	1	1	1
434	247	0	C	246	A	1	0	1	0.4	1	0	1	246	118	128	0	0	0	0	0	0	118	128	2	MT-DLOOP	D-LOOP	1	1	1	1
435	245	0	C	245	A	0	0	0	0	0	0	0	245	118	127	0	0	0	0	0	0	118	127	4	MT-DLOOP	D-LOOP	1	1	1	1
436	244	0	C	244	A	0	0	0	0	0	0	0	244	119	125	0	0	0	0	0	0	119	125	3	MT-DLOOP	D-LOOP	1	1	1	1
437	249	0	C	248	A	1	1	0	0.4	1	1	0	248	122	126	0	0	0	0	0	0	122	126	1	MT-DLOOP	D-LOOP	1	1	1	1
438	243	0	C	243	A	0	0	0	0	0	0	0	243	119	124	0	0	0	0	0	0	119	124	1	MT-DLOOP	D-LOOP	1	1	1	1
439	243	0	A	243	T	0	0	0	0	243	118	125	0	0	0	0	0	0	0	0	0	118	125	1	MT-DLOOP	D-LOOP	1	1	1	1
440	240	0	A	240	T	0	0	0	0	240	120	120	0	0	0	0	0	0	0	0	0	120	120	0	MT-DLOOP	D-LOOP	0	1	1	1
441	251	0	C	251	A	0	0	0	0	0	0	0	251	123	128	0	0	0	0	0	0	123	128	0	MT-DLOOP	D-LOOP	0	1	1	1
442	248	0	T	248	A	0	0	0	0	0	0	0	0	0	0	0	0	0	248	124	124	124	124	0	MT-DLOOP	D-LOOP	0	1	1	1
443	246	0	A	246	T	0	0	0	0	246	121	125	0	0	0	0	0	0	0	0	0	121	125	0	MT-DLOOP	D-LOOP	0	1	1	1
444	245	0	A	245	T	0	0	0	0	245	120	125	0	0	0	0	0	0	0	0	0	120	125	0	MT-DLOOP	D-LOOP	0	1	1	1
445	250	0	C	250	A	0	0	0	0	0	0	0	250	121	129	0	0	0	0	0	0	121	129	0	MT-DLOOP	D-LOOP	0	1	1	1
446	238	0	A	238	T	0	0	0	0	238	121	117	0	0	0	0	0	0	0	0	0	121	117	0	MT-DLOOP	D-LOOP	0	1	1	1
447	246	0	C	246	A	0	0	0	0	0	0	0	246	115	131	0	0	0	0	0	0	115	131	0	MT-DLOOP	D-LOOP	0	1	1	1
448	247	0	A	247	T	0	0	0	0	247	116	131	0	0	0	0	0	0	0	0	0	116	131	0	MT-DLOOP	D-LOOP	0	1	1	1
449	242	0	T	242	A	0	0	0	0	0	0	0	0	0	0	0	0	0	242	113	129	113	129	0	MT-DLOOP	D-LOOP	0	1	1	1
450	247	0	T	247	A	0	0	0	0	0	0	0	0	0	0	0	0	0	247	116	131	116	131	0	MT-DLOOP	D-LOOP	0	1	1	1
451	249	0	A	249	T	0	0	0	0	249	118	131	0	0	0	0	0	0	0	0	0	118	131	2	MT-DLOOP	D-LOOP	1	1	1	1
452	250	0	T	250	A	0	0	0	0	0	0	0	0	0	0	0	0	0	250	118	132	118	132	6	MT-DLOOP	D-LOOP	1	1	1	1
453	251	0	T	251	A	0	0	0	0	0	0	0	0	0	0	0	0	0	251	120	131	120	131	5	MT-DLOOP	D-LOOP	1	1	1	1
454	234	0	T	234	A	0	0	0	0	0	0	0	0	0	0	0	0	0	234	120	114	120	114	4	MT-DLOOP	D-LOOP	1	1	1	1
455	203	0	T	203	A	0	0	0	0	0	0	0	0	0	0	0	0	0	203	117	86	117	86	2	MT-DLOOP	D-LOOP	1	1	1	1
456	239	0	C	239	A	0	0	0	0	0	0	0	239	100	139	0	0	0	0	0	0	100	139	6	MT-DLOOP	D-LOOP	1	1	1	1
457	231	0	C	231	A	0	0	0	0	0	0	0	231	99	132	0	0	0	0	0	0	99	132	5	MT-DLOOP	D-LOOP	1	1	1	1
458	217	0	C	217	A	0	0	0	0	0	0	0	217	103	114	0	0	0	0	0	0	103	114	4	MT-DLOOP	D-LOOP	1	1	1	1
459	212	0	C	211	A	1	1	0	0.47	1	1	0	211	100	111	0	0	0	0	0	0	100	111	3	MT-DLOOP	D-LOOP	1	1	1	1
460	197	0	T	196	G	1	1	0	0.51	0	0	0	0	0	0	1	1	0	196	99	97	99	97	1	MT-DLOOP	D-LOOP	1	1	1	1
461	213	0	C	211	A	2	2	0	0.94	2	2	0	211	100	111	0	0	0	0	0	0	100	111	0	MT-DLOOP	D-LOOP	0	1	1	1
462	213	0	C	212	T	1	1	0	0.47	0	0	0	212	102	110	0	0	0	1	1	0	102	110	0	MT-DLOOP	D-LOOP	0	1	1	1
463	207	0	C	206	T	1	1	0	0.48	0	0	0	206	98	108	0	0	0	1	1	0	98	108	0	MT-DLOOP	D-LOOP	0	1	1	1
464	157	0	A	157	T	0	0	0	0	157	93	64	0	0	0	0	0	0	0	0	0	93	64	0	MT-DLOOP	D-LOOP	0	1	1	1
465	205	0	C	205	A	0	0	0	0	0	0	0	205	95	110	0	0	0	0	0	0	95	110	0	MT-DLOOP	D-LOOP	0	1	1	1
466	192	0	T	192	A	0	0	0	0	0	0	0	0	0	0	0	0	0	192	97	95	97	95	0	MT-DLOOP	D-LOOP	0	1	1	1
467	212	0	C	211	A	1	0	1	0.47	1	0	1	211	95	116	0	0	0	0	0	0	95	116	0	MT-DLOOP	D-LOOP	0	1	1	1
468	218	0	C	218	A	0	0	0	0	0	0	0	218	97	121	0	0	0	0	0	0	97	121	0	MT-DLOOP	D-LOOP	0	1	1	1
469	216	0	C	214	A	2	1	1	0.93	2	1	1	214	94	120	0	0	0	0	0	0	94	120	0	MT-DLOOP	D-LOOP	0	1	1	1
470	212	0	A	211	G	1	1	0	0.47	211	91	120	0	0	0	1	1	0	0	0	0	91	120	0	MT-DLOOP	D-LOOP	0	1	1	1
471	197	0	T	196	A	1	1	0	0.51	1	1	0	0	0	0	0	0	0	196	84	112	84	112	0	MT-DLOOP	D-LOOP	0	1	1	1
472	189	0	A	189	T	0	0	0	0	189	84	105	0	0	0	0	0	0	0	0	0	84	105	0	MT-DLOOP	D-LOOP	0	1	1	1
473	206	0	C	206	A	0	0	0	0	0	0	0	206	84	122	0	0	0	0	0	0	84	122	0	MT-DLOOP	D-LOOP	0	1	1	1
474	195	0	T	195	A	0	0	0	0	0	0	0	0	0	0	0	0	0	195	83	112	83	112	0	MT-DLOOP	D-LOOP	0	1	1	1
475	190	0	A	190	T	0	0	0	0	190	80	110	0	0	0	0	0	0	0	0	0	80	110	0	MT-DLOOP	D-LOOP	0	1	1	1
476	205	0	C	204	A	1	0	1	0.49	1	0	1	204	80	124	0	0	0	0	0	0	80	124	0	MT-DLOOP	D-LOOP	0	1	1	1
477	197	0	T	197	A	0	0	0	0	0	0	0	0	0	0	0	0	0	197	79	118	79	118	0	MT-DLOOP	D-LOOP	0	1	1	1
478	203	0	A	203	T	0	0	0	0	203	80	123	0	0	0	0	0	0	0	0	0	80	123	0	MT-DLOOP	D-LOOP	0	1	1	1
479	198	0	A	198	T	0	0	0	0	198	79	119	0	0	0	0	0	0	0	0	0	79	119	0	MT-DLOOP	D-LOOP	0	1	1	1
480	185	0	T	185	A	0	0	0	0	0	0	0	0	0	0	0	0	0	185	78	107	78	107	0	MT-DLOOP	D-LOOP	0	1	1	1
481	199	0	C	199	A	0	0	0	0	0	0	0	199	78	121	0	0	0	0	0	0	78	121	0	MT-DLOOP	D-LOOP	0	1	1	1
482	185	0	T	185	A	0	0	0	0	0	0	0	0	0	0	0	0	0	185	78	107	78	107	0	MT-DLOOP	D-LOOP	0	1	1	1
483	201	0	C	200	A	1	0	1	0.5	1	0	1	200	79	121	0	0	0	0	0	0	79	121	0	MT-DLOOP	D-LOOP	0	1	1	1
484	196	0	A	196	T	0	0	0	0	196	79	117	0	0	0	0	0	0	0	0	0	79	117	0	MT-DLOOP	D-LOOP	0	1	1	1
485	190	0	T	190	A	0	0	0	0	0	0	0	0	0	0	0	0	0	190	79	111	79	111	0	MT-DLOOP	D-LOOP	0	1	1	1
486	191	0	C	191	A	0	0	0	0	0	0	0	191	72	119	0	0	0	0	0	0	72	119	0	MT-DLOOP	D-LOOP	0	1	1	1
487	179	0	A	179	T	0	0	0	0	179	63	116	0	0	0	0	0	0	0	0	0	63	116	0	MT-DLOOP	D-LOOP	0	1	1	1
488	173	0	A	173	T	0	0	0	0	173	62	111	0	0	0	0	0	0	0	0	0	62	111	0	MT-DLOOP	D-LOOP	0	1	1	1
489	164	0	T	164	A	0	0	0	0	0	0	0	0	0	0	0	0	0	164	63	101	63	101	0	MT-DLOOP	D-LOOP	0	1	1	1
490	138	0	A	138	T	0	0	0	0	138	62	76	0	0	0	0	0	0	0	0	0	62	76	0	MT-DLOOP	D-LOOP	0	1	1	1
491	170	0	C	170	A	0	0	0	0	0	0	0	170	63	107	0	0	0	0	0	0	63	107	0	MT-DLOOP	D-LOOP	0	1	1	1
492	142	0	A	142	T	0	0	0	0	142	59	83	0	0	0	0	0	0	0	0	0	59	83	0	MT-DLOOP	D-LOOP	0	1	1	1
493	108	0	A	108	T	0	0	0	0	108	58	50	0	0	0	0	0	0	0	0	0	58	50	2	MT-DLOOP	D-LOOP	1	1	1	1
494	164	0	C	164	A	0	0	0	0	0	0	0	164	54	110	0	0	0	0	0	0	54	110	2	MT-DLOOP	D-LOOP	1	1	1	1
495	153	0	C	153	A	0	0	0	0	0	0	0	153	50	103	0	0	0	0	0	0	50	103	5	MT-DLOOP	D-LOOP	1	1	1	1
496	155	0	C	155	A	0	0	0	0	0	0	0	155	53	102	0	0	0	0	0	0	53	102	4	MT-DLOOP	D-LOOP	1	1	1	1
497	156	0	C	156	A	0	0	0	0	0	0	0	156	53	103	0	0	0	0	0	0	53	103	3	MT-DLOOP	D-LOOP	1	1	1	1
498	154	0	C	152	A	1	0	1	0.65	1	0	1	152	51	101	1	0	1	0	0	0	51	101	1	MT-DLOOP	D-LOOP	1	1	1	1
499	150	0	G	147	A	2	0	2	1.33	2	0	2	0	0	0	147	50	97	1	0	1	50	97	1	MT-DLOOP	D-LOOP	1	1	1	1
500	146	0	C	146	A	0	0	0	0	0	0	0	146	50	96	0	0	0	0	0	0	50	96	0	MT-DLOOP	D-LOOP	0	1	1	1
501	144	0	C	144	A	0	0	0	0	0	0	0	144	49	95	0	0	0	0	0	0	49	95	0	MT-DLOOP	D-LOOP	0	1	1	1
502	141	0	C	141	A	0	0	0	0	0	0	0	141	49	92	0	0	0	0	0	0	49	92	0	MT-DLOOP	D-LOOP	0	1	1	1
503	139	0	A	139	T	0	0	0	0	139	48	91	0	0	0	0	0	0	0	0	0	48	91	0	MT-DLOOP	D-LOOP	0	1	1	1
504	136	0	T	136	A	0	0	0	0	0	0	0	0	0	0	0	0	0	136	48	88	48	88	0	MT-DLOOP	D-LOOP	0	1	1	1
505	138	0	C	138	A	0	0	0	0	0	0	0	138	48	90	0	0	0	0	0	0	48	90	0	MT-DLOOP	D-LOOP	0	1	1	1
506	140	0	C	140	A	0	0	0	0	0	0	0	140	50	90	0	0	0	0	0	0	50	90	0	MT-DLOOP	D-LOOP	0	1	1	1
507	138	0	T	138	A	0	0	0	0	0	0	0	0	0	0	0	0	0	138	50	88	50	88	0	MT-DLOOP	D-LOOP	0	1	1	1
508	131	0	A	131	T	0	0	0	0	131	49	82	0	0	0	0	0	0	0	0	0	49	82	0	MT-DLOOP	D-LOOP	0	1	1	1
509	136	0	C	136	A	0	0	0	0	0	0	0	136	48	88	0	0	0	0	0	0	48	88	0	MT-DLOOP	D-LOOP	0	1	1	1
510	132	0	C	132	A	0	0	0	0	0	0	0	132	49	83	0	0	0	0	0	0	49	83	0	MT-DLOOP	D-LOOP	0	1	1	1
511	131	0	C	131	A	0	0	0	0	0	0	0	131	49	82	0	0	0	0	0	0	49	82	0	MT-DLOOP	D-LOOP	0	1	1	1
512	127	0	A	127	T	0	0	0	0	127	47	80	0	0	0	0	0	0	0	0	0	47	80	0	MT-DLOOP	D-LOOP	0	1	1	1
513	127	0	G	127	A	0	0	0	0	0	0	0	0	0	0	127	47	80	0	0	0	47	80	8	MT-DLOOP	D-LOOP	1	1	1	1
514	37	0	C	37	A	0	0	0	0	0	0	0	37	26	11	0	0	0	0	0	0	26	11	8	MT-DLOOP	D-LOOP	1	1	1	1
515	34	0	A	32	T	1	1	0	2.94	32	26	6	0	0	0	1	0	1	1	1	0	26	6	9	MT-DLOOP	D-LOOP	1	1	1	1
516	112	0	C	112	A	0	0	0	0	0	0	0	112	44	68	0	0	0	0	0	0	44	68	8	MT-DLOOP	D-LOOP	1	1	1	1
517	99	0	A	99	T	0	0	0	0	99	35	64	0	0	0	0	0	0	0	0	0	35	64	9	MT-DLOOP	D-LOOP	1	1	1	1
518	100	0	C	100	A	0	0	0	0	0	0	0	100	34	66	0	0	0	0	0	0	34	66	8	MT-DLOOP	D-LOOP	1	1	1	1
519	97	0	A	97	T	0	0	0	0	97	32	65	0	0	0	0	0	0	0	0	0	32	65	9	MT-DLOOP	D-LOOP	1	1	1	1
520	96	0	C	96	A	0	0	0	0	0	0	0	96	30	66	0	0	0	0	0	0	30	66	10	MT-DLOOP	D-LOOP	1	1	1	1
521	90	0	A	90	T	0	0	0	0	90	26	64	0	0	0	0	0	0	0	0	0	26	64	7	MT-DLOOP	D-LOOP	1	1	1	1
522	91	0	C	91	A	0	0	0	0	0	0	0	91	25	66	0	0	0	0	0	0	25	66	12	MT-DLOOP	D-LOOP	1	1	1	1
523	89	0	A	85	C	3	1	2	3.37	85	24	61	3	1	2	1	0	1	0	0	0	24	61	7	MT-DLOOP	D-LOOP	1	1	0	1
524	88	0	C	86	G	2	0	2	2.27	0	0	0	86	24	62	2	0	2	0	0	0	24	62	14	MT-DLOOP	D-LOOP	1	1	1	1
525	88	0	C	88	A	0	0	0	0	0	0	0	88	24	64	0	0	0	0	0	0	24	64	7	MT-DLOOP	D-LOOP	1	1	1	1
526	87	0	G	87	A	0	0	0	0	0	0	0	0	0	0	87	24	63	0	0	0	24	63	0	MT-DLOOP	D-LOOP	0	1	1	1
527	88	0	C	88	A	0	0	0	0	0	0	0	88	25	63	0	0	0	0	0	0	25	63	0	MT-DLOOP	D-LOOP	0	1	1	1
528	87	0	T	87	A	0	0	0	0	0	0	0	0	0	0	0	0	0	87	24	63	24	63	0	MT-DLOOP	D-LOOP	0	1	1	1
529	86	0	G	86	A	0	0	0	0	0	0	0	0	0	0	86	25	61	0	0	0	25	61	0	MT-DLOOP	D-LOOP	0	1	1	1
530	84	0	C	84	A	0	0	0	0	0	0	0	84	25	59	0	0	0	0	0	0	25	59	0	MT-DLOOP	D-LOOP	0	1	1	1
531	82	0	T	82	A	0	0	0	0	0	0	0	0	0	0	0	0	0	82	24	58	24	58	0	MT-DLOOP	D-LOOP	0	1	1	1
532	80	0	A	80	T	0	0	0	0	80	24	56	0	0	0	0	0	0	0	0	0	24	56	0	MT-DLOOP	D-LOOP	0	1	1	1
533	81	0	A	81	T	0	0	0	0	81	24	57	0	0	0	0	0	0	0	0	0	24	57	2	MT-DLOOP	D-LOOP	1	1	1	1
534	81	0	C	81	A	0	0	0	0	0	0	0	81	24	57	0	0	0	0	0	0	24	57	6	MT-DLOOP	D-LOOP	1	1	1	1
535	76	0	C	76	A	0	0	0	0	0	0	0	76	24	52	0	0	0	0	0	0	24	52	5	MT-DLOOP	D-LOOP	1	1	1	1
536	73	0	C	73	A	0	0	0	0	0	0	0	73	22	51	0	0	0	0	0	0	22	51	4	MT-DLOOP	D-LOOP	1	1	1	1
537	73	0	C	72	G	1	1	0	1.37	0	0	0	72	21	51	1	1	0	0	0	0	21	51	3	MT-DLOOP	D-LOOP	1	1	1	1
538	69	0	A	69	T	0	0	0	0	69	19	50	0	0	0	0	0	0	0	0	0	19	50	1	MT-DLOOP	D-LOOP	1	1	1	1
539	64	0	T	63	G	1	1	0	1.56	0	0	0	0	0	0	1	1	0	63	16	47	16	47	0	MT-DLOOP	D-LOOP	0	1	1	1
540	62	0	A	62	T	0	0	0	0	62	18	44	0	0	0	0	0	0	0	0	0	18	44	2	MT-DLOOP	D-LOOP	1	1	1	1
541	66	0	C	65	T	1	1	0	1.52	0	0	0	65	16	49	0	0	0	1	1	0	16	49	6	MT-DLOOP	D-LOOP	1	1	1	1
542	62	0	C	62	A	0	0	0	0	0	0	0	62	16	46	0	0	0	0	0	0	16	46	5	MT-DLOOP	D-LOOP	1	1	1	1
543	58	0	C	58	A	0	0	0	0	0	0	0	58	12	46	0	0	0	0	0	0	12	46	4	MT-DLOOP	D-LOOP	1	1	1	1
544	57	0	C	57	A	0	0	0	0	0	0	0	57	11	46	0	0	0	0	0	0	11	46	3	MT-DLOOP	D-LOOP	1	1	1	1
545	54	0	G	54	A	0	0	0	0	0	0	0	0	0	0	54	8	46	0	0	0	8	46	1	MT-DLOOP	D-LOOP	1	1	1	1
546	51	0	A	50	G	1	0	1	1.96	50	8	42	0	0	0	1	0	1	0	0	0	8	42	0	MT-DLOOP	D-LOOP	0	1	1	1
547	49	0	A	49	T	0	0	0	0	49	8	41	0	0	0	0	0	0	0	0	0	8	41	0	MT-DLOOP	D-LOOP	0	1	1	1
548	50	0	C	50	A	0	0	0	0	0	0	0	50	9	41	0	0	0	0	0	0	9	41	0	MT-DLOOP	D-LOOP	0	1	1	1
549	50	0	C	50	A	0	0	0	0	0	0	0	50	10	40	0	0	0	0	0	0	10	40	0	MT-DLOOP	D-LOOP	0	1	1	1
550	46	0	A	46	T	0	0	0	0	46	6	40	0	0	0	0	0	0	0	0	0	6	40	0	MT-DLOOP	D-LOOP	0	1	1	1
551	46	0	A	46	T	0	0	0	0	46	6	40	0	0	0	0	0	0	0	0	0	6	40	0	MT-DLOOP	D-LOOP	0	1	1	1
552	47	0	C	47	A	0	0	0	0	0	0	0	47	7	40	0	0	0	0	0	0	7	40	0	MT-DLOOP	D-LOOP	0	1	1	1
553	43	0	C	43	A	0	0	0	0	0	0	0	43	5	38	0	0	0	0	0	0	5	38	0	MT-DLOOP	D-LOOP	0	1	1	1
554	43	0	A	43	T	0	0	0	0	43	5	38	0	0	0	0	0	0	0	0	0	5	38	0	MT-DLOOP	D-LOOP	0	1	1	1
555	42	0	A	42	T	0	0	0	0	42	4	38	0	0	0	0	0	0	0	0	0	4	38	0	MT-DLOOP	D-LOOP	0	1	1	1
556	42	0	A	42	T	0	0	0	0	42	4	38	0	0	0	0	0	0	0	0	0	4	38	2	MT-DLOOP	D-LOOP	1	1	1	1
557	42	0	C	42	A	0	0	0	0	0	0	0	42	4	38	0	0	0	0	0	0	4	38	6	MT-DLOOP	D-LOOP	1	1	1	1
558	30	0	C	30	A	0	0	0	0	0	0	0	30	4	26	0	0	0	0	0	0	4	26	5	MT-DLOOP	D-LOOP	1	1	1	1
559	30	0	C	30	A	0	0	0	0	0	0	0	30	4	26	0	0	0	0	0	0	4	26	4	MT-DLOOP	D-LOOP	1	1	1	1
560	30	0	C	30	A	0	0	0	0	0	0	0	30	4	26	0	0	0	0	0	0	4	26	3	MT-DLOOP	D-LOOP	1	1	1	1
561	29	0	A	28	G	1	0	1	3.45	28	4	24	0	0	0	1	0	1	0	0	0	4	24	1	MT-DLOOP	D-LOOP	1	1	1	1
562	27	0	A	27	T	0	0	0	0	27	4	23	0	0	0	0	0	0	0	0	0	4	23	0	MT-DLOOP	D-LOOP	0	1	1	1
563	26	0	A	26	T	0	0	0	0	26	3	23	0	0	0	0	0	0	0	0	0	3	23	0	MT-DLOOP	D-LOOP	0	1	1	1
564	27	0	G	27	A	0	0	0	0	0	0	0	0	0	0	27	3	24	0	0	0	3	24	0	MT-DLOOP	D-LOOP	0	1	1	1
565	21	0	A	21	T	0	0	0	0	21	3	18	0	0	0	0	0	0	0	0	0	3	18	0	MT-DLOOP	D-LOOP	0	1	1	1
566	24	0	C	24	A	0	0	0	0	0	0	0	24	6	18	0	0	0	0	0	0	6	18	0	MT-DLOOP	D-LOOP	0	1	1	1
567	22	0	A	19	T	1	1	0	4.55	19	6	13	1	1	0	1	1	0	1	1	0	6	13	2	MT-DLOOP	D-LOOP	1	1	1	1
568	26	0	C	25	G	1	1	0	3.85	0	0	0	25	10	15	1	1	0	0	0	0	10	15	2	MT-DLOOP	D-LOOP	1	1	1	1
569	26	0	C	26	A	0	0	0	0	0	0	0	26	15	11	0	0	0	0	0	0	15	11	2	MT-DLOOP	D-LOOP	1	1	1	1
570	27	0	C	27	A	0	0	0	0	0	0	0	27	21	6	0	0	0	0	0	0	21	6	4	MT-DLOOP	D-LOOP	1	1	1	1
571	49	0	C	48	T	1	0	1	2.04	0	0	0	48	42	6	0	0	0	1	0	1	42	6	3	MT-DLOOP	D-LOOP	1	1	1	1
572	222	0	C	220	T	1	0	1	0.45	0	0	0	220	217	3	1	0	1	1	0	1	217	3	1	MT-DLOOP	D-LOOP	1	1	1	1
573	685	0	C	682	T	2	0	2	0.29	1	0	1	682	679	3	0	0	0	2	0	2	679	3	1	MT-DLOOP	D-LOOP	1	1	1	1
574	704	0	A	698	T	3	1	2	0.43	698	694	4	1	0	1	2	2	0	3	1	2	694	4	1	MT-DLOOP	D-LOOP	1	1	1	1
575	731	0	C	730	T	1	0	1	0.14	0	0	0	730	723	7	0	0	0	1	0	1	723	7	0	MT-DLOOP	D-LOOP	0	1	1	1
576	812	0	A	808	T	2	0	2	0.25	808	803	5	1	1	0	1	1	0	2	0	2	803	5	0	MT-DLOOP	D-LOOP	0	1	1	1
577	1336	0	G	1334	T	2	2	0	0.15	0	0	0	0	0	0	1334	1325	9	2	2	0	1325	9	0	MT-TF	tRNA	0	0	1	1
578	1375	0	T	1375	A	0	0	0	0	0	0	0	0	0	0	0	0	0	1375	1366	9	1366	9	0	MT-TF	tRNA	0	0	1	1
579	1388	0	T	1388	A	0	0	0	0	0	0	0	0	0	0	0	0	0	1388	1378	10	1378	10	0	MT-TF	tRNA	0	0	1	1
580	1412	0	T	1412	A	0	0	0	0	0	0	0	0	0	0	0	0	0	1412	1402	10	1402	10	0	MT-TF	tRNA	0	0	1	1
581	1501	0	A	1501	T	0	0	0	0	1501	1491	10	0	0	0	0	0	0	0	0	0	1491	10	0	MT-TF	tRNA	0	0	1	1
582	1540	0	T	1540	A	0	0	0	0	0	0	0	0	0	0	0	0	0	1540	1529	11	1529	11	0	MT-TF	tRNA	0	0	1	1
583	1620	0	G	1620	A	0	0	0	0	0	0	0	0	0	0	1620	1609	11	0	0	0	1609	11	0	MT-TF	tRNA	0	0	1	1
584	1617	0	T	1615	C	2	2	0	0.12	0	0	0	2	2	0	0	0	0	1615	1603	12	1603	12	0	MT-TF	tRNA	0	0	1	1
585	1681	0	A	1680	G	1	1	0	0.06	1680	1668	12	0	0	0	1	1	0	0	0	0	1668	12	0	MT-TF	tRNA	0	0	1	1
586	1731	0	G	1731	A	0	0	0	0	0	0	0	0	0	0	1731	1719	12	0	0	0	1719	12	0	MT-TF	tRNA	0	0	1	1
587	1888	0	C	1886	A	2	2	0	0.11	2	2	0	1886	1875	11	0	0	0	0	0	0	1875	11	0	MT-TF	tRNA	0	0	1	1
588	1902	0	T	1902	A	0	0	0	0	0	0	0	0	0	0	0	0	0	1902	1881	21	1881	21	0	MT-TF	tRNA	0	0	1	1
589	1907	0	T	1907	A	0	0	0	0	0	0	0	0	0	0	0	0	0	1907	1885	22	1885	22	0	MT-TF	tRNA	0	0	1	1
590	1911	0	A	1910	G	1	0	1	0.05	1910	1889	21	0	0	0	1	0	1	0	0	0	1889	21	0	MT-TF	tRNA	0	0	1	1
591	1939	0	C	1937	A	1	1	0	0.05	1	1	0	1937	1908	29	0	0	0	1	1	0	1908	29	0	MT-TF	tRNA	0	0	1	1
592	1957	0	C	1955	A	1	1	0	0.05	1	1	0	1955	1925	30	0	0	0	1	1	0	1925	30	0	MT-TF	tRNA	0	0	1	1
593	1963	0	T	1963	A	0	0	0	0	0	0	0	0	0	0	0	0	0	1963	1928	35	1928	35	0	MT-TF	tRNA	0	0	1	1
594	2001	0	C	2001	A	0	0	0	0	0	0	0	2001	1955	46	0	0	0	0	0	0	1955	46	0	MT-TF	tRNA	0	0	1	1
595	2102	0	C	2101	A	1	1	0	0.05	1	1	0	2101	2007	94	0	0	0	0	0	0	2007	94	0	MT-TF	tRNA	0	0	1	1
596	2100	0	T	2100	A	0	0	0	0	0	0	0	0	0	0	0	0	0	2100	2009	91	2009	91	0	MT-TF	tRNA	0	0	1	1
597	2129	0	C	2127	A	2	2	0	0.09	2	2	0	2127	2032	95	0	0	0	0	0	0	2032	95	0	MT-TF	tRNA	0	0	1	1
598	2139	0	A	2138	G	1	1	0	0.05	2138	2036	102	0	0	0	1	1	0	0	0	0	2036	102	0	MT-TF	tRNA	0	0	1	1
599	2184	0	A	2184	T	0	0	0	0	2184	2081	103	0	0	0	0	0	0	0	0	0	2081	103	0	MT-TF	tRNA	0	0	1	1
600	2213	0	A	2213	T	0	0	0	0	2213	2082	131	0	0	0	0	0	0	0	0	0	2082	131	0	MT-TF	tRNA	0	0	1	1
601	2249	0	G	2247	T	2	2	0	0.09	0	0	0	0	0	0	2247	2109	138	2	2	0	2109	138	0	MT-TF	tRNA	0	0	1	1
602	2336	0	C	2332	T	3	2	1	0.13	1	1	0	2332	2112	220	0	0	0	3	2	1	2112	220	0	MT-TF	tRNA	0	0	1	1
603	2376	0	A	2376	T	0	0	0	0	2376	2141	235	0	0	0	0	0	0	0	0	0	2141	235	0	MT-TF	tRNA	0	0	1	1
604	2410	0	A	2410	T	0	0	0	0	2410	2158	252	0	0	0	0	0	0	0	0	0	2158	252	0	MT-TF	tRNA	0	0	1	1
605	2415	0	T	2415	A	0	0	0	0	0	0	0	0	0	0	0	0	0	2415	2162	253	2162	253	0	MT-TF	tRNA	0	0	1	1
606	2421	0	A	2419	G	2	2	0	0.08	2419	2158	261	0	0	0	2	2	0	0	0	0	2158	261	0	MT-TF	tRNA	0	0	1	1
607	2445	0	C	2442	A	2	2	0	0.08	2	2	0	2442	2162	280	0	0	0	1	1	0	2162	280	0	MT-TF	tRNA	0	0	1	1
608	2454	0	A	2454	T	0	0	0	0	2454	2159	295	0	0	0	0	0	0	0	0	0	2159	295	0	MT-TF	tRNA	0	0	1	1
609	2513	0	C	2508	A	3	3	0	0.12	3	3	0	2508	2170	338	1	0	1	1	0	1	2170	338	0	MT-TF	tRNA	0	0	1	1
610	2623	0	T	2621	C	2	0	2	0.08	0	0	0	2	0	2	0	0	0	2621	2197	424	2197	424	0	MT-TF	tRNA	0	0	1	1
611	2718	0	G	2717	T	1	0	1	0.04	0	0	0	0	0	0	2717	2284	433	1	0	1	2284	433	2	MT-TF	tRNA	1	0	1	1
612	2797	0	A	2796	T	1	1	0	0.04	2796	2354	442	0	0	0	0	0	0	1	1	0	2354	442	6	MT-TF	tRNA	1	0	1	1
613	2829	0	A	2829	T	0	0	0	0	2829	2377	452	0	0	0	0	0	0	0	0	0	2377	452	5	MT-TF	tRNA	1	0	1	1
614	2848	0	A	2848	T	0	0	0	0	2848	2384	464	0	0	0	0	0	0	0	0	0	2384	464	4	MT-TF	tRNA	1	0	1	1
615	2859	0	A	2859	T	0	0	0	0	2859	2385	474	0	0	0	0	0	0	0	0	0	2385	474	3	MT-TF	tRNA	1	0	1	1
616	2910	0	T	2909	C	1	1	0	0.03	0	0	0	1	1	0	0	0	0	2909	2386	523	2386	523	1	MT-TF	tRNA	1	0	1	1
617	3012	0	G	3012	A	0	0	0	0	0	0	0	0	0	0	3012	2487	525	0	0	0	2487	525	0	MT-TF	tRNA	0	0	1	1
618	3019	0	T	3018	C	1	1	0	0.03	0	0	0	1	1	0	0	0	0	3018	2483	535	2483	535	0	MT-TF	tRNA	0	0	1	1
619	3037	0	T	3037	A	0	0	0	0	0	0	0	0	0	0	0	0	0	3037	2497	540	2497	540	0	MT-TF	tRNA	0	0	1	1
620	3069	0	T	3068	C	1	1	0	0.03	0	0	0	1	1	0	0	0	0	3068	2498	570	2498	570	0	MT-TF	tRNA	0	0	1	1
621	3084	0	A	3083	G	1	1	0	0.03	3083	2508	575	0	0	0	1	1	0	0	0	0	2508	575	0	MT-TF	tRNA	0	0	1	1
622	3091	0	G	3089	C	2	2	0	0.06	0	0	0	2	2	0	3089	2514	575	0	0	0	2514	575	0	MT-TF	tRNA	0	0	1	1
623	3080	0	A	3079	G	1	1	0	0.03	3079	2515	564	0	0	0	1	1	0	0	0	0	2515	564	0	MT-TF	tRNA	0	0	1	1
624	3143	0	C	3139	A	3	3	0	0.1	3	3	0	3139	2550	589	0	0	0	1	1	0	2550	589	0	MT-TF	tRNA	0	0	1	1
625	3174	0	G	3169	T	4	4	0	0.13	1	1	0	0	0	0	3169	2553	616	4	4	0	2553	616	0	MT-TF	tRNA	0	0	1	1
626	3217	0	G	3210	T	5	5	0	0.16	1	0	1	1	0	1	3210	2543	667	5	5	0	2543	667	0	MT-TF	tRNA	0	0	1	1
627	3247	0	G	3243	T	3	2	1	0.09	1	1	0	0	0	0	3243	2562	681	3	2	1	2562	681	0	MT-TF	tRNA	0	0	1	1
628	3288	0	C	3287	A	1	1	0	0.03	1	1	0	3287	2596	691	0	0	0	0	0	0	2596	691	0	MT-TF	tRNA	0	0	1	1
629	3283	0	T	3283	A	0	0	0	0	0	0	0	0	0	0	0	0	0	3283	2600	683	2600	683	0	MT-TF	tRNA	0	0	1	1
630	3310	0	C	3308	T	1	1	0	0.03	0	0	0	3308	2621	687	1	1	0	1	1	0	2621	687	0	MT-TF	tRNA	0	0	1	1
631	3313	0	A	3313	T	0	0	0	0	3313	2623	690	0	0	0	0	0	0	0	0	0	2623	690	0	MT-TF	tRNA	0	0	1	1
632	3345	0	C	3341	A	2	2	0	0.06	2	2	0	3341	2637	704	1	0	1	1	0	1	2637	704	0	MT-TF	tRNA	0	0	1	1
633	3361	0	A	3361	T	0	0	0	0	3361	2648	713	0	0	0	0	0	0	0	0	0	2648	713	0	MT-TF	tRNA	0	0	1	1
634	3379	0	T	3378	A	1	1	0	0.03	1	1	0	0	0	0	0	0	0	3378	2658	720	2658	720	0	MT-TF	tRNA	0	0	1	1
635	3384	0	C	3384	A	0	0	0	0	0	0	0	3384	2669	715	0	0	0	0	0	0	2669	715	0	MT-TF	tRNA	0	0	1	1
636	3305	0	A	3304	G	1	1	0	0.03	3304	2677	627	0	0	0	1	1	0	0	0	0	2677	627	2	MT-TF	tRNA	1	0	1	1
637	3482	0	C	3482	A	0	0	0	0	0	0	0	3482	2670	812	0	0	0	0	0	0	2670	812	6	MT-TF	tRNA	1	0	1	1
638	3492	0	C	3487	A	4	2	2	0.11	4	2	2	3487	2665	822	0	0	0	1	1	0	2665	822	5	MT-TF	tRNA	1	0	1	1
639	3527	0	C	3525	A	2	2	0	0.06	2	2	0	3525	2696	829	0	0	0	0	0	0	2696	829	4	MT-TF	tRNA	1	0	1	1
640	3553	0	C	3551	A	2	1	1	0.06	2	1	1	3551	2714	837	0	0	0	0	0	0	2714	837	3	MT-TF	tRNA	1	0	1	1
641	3544	0	A	3543	T	1	1	0	0.03	3543	2708	835	0	0	0	0	0	0	1	1	0	2708	835	1	MT-TF	tRNA	1	0	1	1
642	3552	0	T	3551	C	1	1	0	0.03	0	0	0	1	1	0	0	0	0	3551	2714	837	2714	837	0	MT-TF	tRNA	0	0	1	1
643	3595	0	A	3595	T	0	0	0	0	3595	2750	845	0	0	0	0	0	0	0	0	0	2750	845	0	MT-TF	tRNA	0	0	1	1
644	3592	0	A	3592	T	0	0	0	0	3592	2746	846	0	0	0	0	0	0	0	0	0	2746	846	0	MT-TF	tRNA	0	0	1	1
645	3600	0	A	3600	T	0	0	0	0	3600	2752	848	0	0	0	0	0	0	0	0	0	2752	848	0	MT-TF	tRNA	0	0	1	1
646	3635	0	C	3633	A	1	1	0	0.03	1	1	0	3633	2771	862	0	0	0	1	1	0	2771	862	0	MT-TF	tRNA	0	0	1	1
647	3650	0	A	3649	G	1	0	1	0.03	3649	2779	870	0	0	0	1	0	1	0	0	0	2779	870	0	MT-TF	tRNA	0	0	1	1
648	3886	0	A	3884	C	1	1	0	0.03	3884	2797	1087	1	1	0	1	0	1	0	0	0	2797	1087	0	MT-RNR1	rRNA	0	0	1	1
649	3944	0	A	3943	T	1	1	0	0.03	3943	2809	1134	0	0	0	0	0	0	1	1	0	2809	1134	0	MT-RNR1	rRNA	0	0	1	1
650	3983	0	T	3983	A	0	0	0	0	0	0	0	0	0	0	0	0	0	3983	2833	1150	2833	1150	0	MT-RNR1	rRNA	0	0	1	1
651	4027	0	A	4026	C	1	0	1	0.02	4026	2835	1191	1	0	1	0	0	0	0	0	0	2835	1191	0	MT-RNR1	rRNA	0	0	1	1
652	4057	0	G	4054	T	3	1	2	0.07	0	0	0	0	0	0	4054	2827	1227	3	1	2	2827	1227	0	MT-RNR1	rRNA	0	0	1	1
653	4164	0	G	4162	T	1	1	0	0.02	0	0	0	1	1	0	4162	2873	1289	1	1	0	2873	1289	0	MT-RNR1	rRNA	0	0	1	1
654	4031	0	T	4031	A	0	0	0	0	0	0	0	0	0	0	0	0	0	4031	2723	1308	2723	1308	0	MT-RNR1	rRNA	0	0	1	1
655	4162	0	T	4160	C	2	0	2	0.05	0	0	0	2	0	2	0	0	0	4160	2848	1312	2848	1312	0	MT-RNR1	rRNA	0	0	1	1
656	4204	0	T	4201	C	2	1	1	0.05	1	0	1	2	1	1	0	0	0	4201	2866	1335	2866	1335	0	MT-RNR1	rRNA	0	0	1	1
657	4234	0	G	4229	T	5	2	3	0.12	0	0	0	0	0	0	4229	2876	1353	5	2	3	2876	1353	0	MT-RNR1	rRNA	0	0	1	1
658	4252	0	G	4243	A	6	2	4	0.14	6	2	4	2	0	2	4243	2886	1357	1	0	1	2886	1357	0	MT-RNR1	rRNA	0	0	1	1
659	4211	0	T	4204	C	5	5	0	0.12	1	0	1	5	5	0	1	1	0	4204	2844	1360	2844	1360	0	MT-RNR1	rRNA	0	0	1	1
660	5167	0	C	5160	A	5	5	0	0.1	5	5	0	5160	3786	1374	0	0	0	2	1	1	3786	1374	0	MT-RNR1	rRNA	0	0	1	1
661	6776	4	C	6763	T	7	7	0	0.1	4	3	1	6763	5373	1390	2	2	0	7	7	0	5373	1390	0	MT-RNR1	rRNA	0	0	1	1
662	7126	0	T	7097	C	19	19	0	0.27	4	4	0	19	19	0	6	3	3	7097	5691	1406	5691	1406	0	MT-RNR1	rRNA	0	0	1	1
663	8177	0	G	8161	T	10	8	2	0.12	4	2	2	2	0	2	8161	6649	1512	10	8	2	6649	1512	0	MT-RNR1	rRNA	0	0	1	1
664	8330	0	G	8308	T	15	6	9	0.18	4	4	0	3	0	3	8308	6718	1590	15	6	9	6718	1590	0	MT-RNR1	rRNA	0	0	1	0
665	8508	0	C	8490	A	9	9	0	0.11	9	9	0	8490	6873	1617	2	1	1	7	4	3	6873	1617	0	MT-RNR1	rRNA	0	0	1	1
666	9110	0	C	9092	A	11	6	5	0.12	11	6	5	9092	7416	1676	0	0	0	7	1	6	7416	1676	0	MT-RNR1	rRNA	0	0	1	0
667	9484	0	T	9478	C	4	3	1	0.04	0	0	0	4	3	1	2	0	2	9478	7741	1737	7741	1737	0	MT-RNR1	rRNA	0	0	1	1
668	9594	0	T	9585	C	6	4	2	0.06	3	1	2	6	4	2	0	0	0	9585	7795	1790	7795	1790	0	MT-RNR1	rRNA	0	0	1	1
669	9622	0	T	9619	C	3	2	1	0.03	0	0	0	3	2	1	0	0	0	9619	7810	1809	7810	1809	0	MT-RNR1	rRNA	0	0	1	1
670	9761	0	C	9756	A	3	3	0	0.03	3	3	0	9756	7881	1875	1	1	0	1	1	0	7881	1875	0	MT-RNR1	rRNA	0	0	1	1
671	9759	0	T	9759	A	0	0	0	0	0	0	0	0	0	0	0	0	0	9759	7875	1884	7875	1884	0	MT-RNR1	rRNA	0	0	1	1
672	9891	0	A	9887	T	2	2	0	0.02	9887	7986	1901	0	0	0	2	2	0	2	2	0	7986	1901	0	MT-RNR1	rRNA	0	0	1	1
673	9542	0	T	9538	A	2	2	0	0.02	2	2	0	1	1	0	1	1	0	9538	7630	1908	7630	1908	0	MT-RNR1	rRNA	0	0	1	1
674	9566	0	T	9563	A	1	1	0	0.01	1	1	0	1	1	0	1	1	0	9563	7645	1918	7645	1918	0	MT-RNR1	rRNA	0	0	1	1
675	9569	0	A	9567	T	2	2	0	0.02	9567	7635	1932	0	0	0	0	0	0	2	2	0	7635	1932	0	MT-RNR1	rRNA	0	0	1	1
676	9543	0	G	9535	T	4	2	2	0.04	1	1	0	3	3	0	9535	7592	1943	4	2	2	7592	1943	0	MT-RNR1	rRNA	0	0	1	1
677	9331	0	C	9324	A	4	2	2	0.04	4	2	2	9324	7367	1957	1	1	0	2	0	2	7367	1957	0	MT-RNR1	rRNA	0	0	1	1
678	9448	0	T	9447	C	1	1	0	0.01	0	0	0	1	1	0	0	0	0	9447	7431	2016	7431	2016	0	MT-RNR1	rRNA	0	0	1	1
679	9544	0	C	9536	T	4	3	1	0.04	3	3	0	9536	7507	2029	1	1	0	4	3	1	7507	2029	0	MT-RNR1	rRNA	0	0	1	1
680	9529	0	T	9528	A	1	0	1	0.01	1	0	1	0	0	0	0	0	0	9528	7493	2035	7493	2035	0	MT-RNR1	rRNA	0	0	1	1
681	9466	0	T	9464	A	1	1	0	0.01	1	1	0	1	0	1	0	0	0	9464	7425	2039	7425	2039	0	MT-RNR1	rRNA	0	0	1	1
682	9435	0	A	9433	G	2	2	0	0.02	9433	7390	2043	0	0	0	2	2	0	0	0	0	7390	2043	0	MT-RNR1	rRNA	0	0	1	1
683	9605	0	G	9601	T	3	3	0	0.03	0	0	0	1	1	0	9601	7555	2046	3	3	0	7555	2046	0	MT-RNR1	rRNA	0	0	1	1
684	9625	0	T	9625	A	0	0	0	0	0	0	0	0	0	0	0	0	0	9625	7577	2048	7577	2048	0	MT-RNR1	rRNA	0	0	1	1
685	9614	0	A	9614	T	0	0	0	0	9614	7560	2054	0	0	0	0	0	0	0	0	0	7560	2054	0	MT-RNR1	rRNA	0	0	1	1
686	9647	0	A	9646	C	1	1	0	0.01	9646	7544	2102	1	1	0	0	0	0	0	0	0	7544	2102	0	MT-RNR1	rRNA	0	0	1	1
687	9515	0	G	9511	T	4	3	1	0.04	0	0	0	0	0	0	9511	7409	2102	4	3	1	7409	2102	0	MT-RNR1	rRNA	0	0	1	1
688	9531	0	A	9527	G	3	3	0	0.03	9527	7434	2093	1	1	0	3	3	0	0	0	0	7434	2093	0	MT-RNR1	rRNA	0	0	1	1
689	9606	0	T	9603	C	2	0	2	0.02	1	1	0	2	0	2	0	0	0	9603	7442	2161	7442	2161	0	MT-RNR1	rRNA	0	0	1	1
690	9736	0	T	9735	C	1	1	0	0.01	0	0	0	1	1	0	0	0	0	9735	7555	2180	7555	2180	0	MT-RNR1	rRNA	0	0	1	1
691	9718	0	A	9712	G	5	5	0	0.05	9712	7557	2155	0	0	0	5	5	0	1	1	0	7557	2155	0	MT-RNR1	rRNA	0	0	1	1
692	9906	0	C	9895	T	7	5	2	0.07	4	3	1	9895	7683	2212	0	0	0	7	5	2	7683	2212	0	MT-RNR1	rRNA	0	0	1	1
693	9873	0	A	9868	T	2	1	1	0.02	9868	7686	2182	2	0	2	1	0	1	2	1	1	7686	2182	0	MT-RNR1	rRNA	0	0	1	1
694	9961	0	C	9945	A	9	6	3	0.09	9	6	3	9945	7688	2257	5	3	2	2	1	1	7688	2257	0	MT-RNR1	rRNA	0	0	1	1
695	9889	0	A	9885	G	3	3	0	0.03	9885	7670	2215	0	0	0	3	3	0	1	0	1	7670	2215	0	MT-RNR1	rRNA	0	0	1	1
696	9959	0	T	9957	G	2	1	1	0.02	0	0	0	0	0	0	2	1	1	9957	7700	2257	7700	2257	0	MT-RNR1	rRNA	0	0	1	1
697	10439	2	G	10416	T	15	3	12	0.14	2	1	1	6	1	5	10416	7725	2691	15	3	12	7725	2691	0	MT-RNR1	rRNA	0	0	1	1
698	10856	0	C	10847	A	6	4	2	0.06	6	4	2	10847	8046	2801	0	0	0	3	1	2	8046	2801	0	MT-RNR1	rRNA	0	0	1	1
699	11015	0	A	10999	G	15	4	11	0.14	10999	8046	2953	1	0	1	15	4	11	0	0	0	8046	2953	0	MT-RNR1	rRNA	0	0	1	1
700	10997	0	A	10995	C	1	1	0	0.01	10995	8059	2936	1	1	0	1	0	1	0	0	0	8059	2936	0	MT-RNR1	rRNA	0	0	1	1
701	11024	0	G	11011	T	10	7	3	0.09	1	1	0	2	1	1	11011	8045	2966	10	7	3	8045	2966	0	MT-RNR1	rRNA	0	0	1	1
702	11022	0	C	11016	A	4	4	0	0.04	4	4	0	11016	8067	2949	0	0	0	2	1	1	8067	2949	0	MT-RNR1	rRNA	0	0	1	1
703	10867	0	A	10860	G	6	1	5	0.06	10860	8077	2783	0	0	0	6	1	5	1	1	0	8077	2783	0	MT-RNR1	rRNA	0	0	1	1
704	10836	0	T	10830	C	5	3	2	0.05	0	0	0	5	3	2	1	1	0	10830	8061	2769	8061	2769	2	MT-RNR1	rRNA	1	0	1	1
705	11287	0	C	11276	A	7	7	0	0.06	7	7	0	11276	8241	3035	1	1	0	3	3	0	8241	3035	6	MT-RNR1	rRNA	1	0	1	1
706	11350	0	C	11343	T	5	5	0	0.04	1	0	1	11343	8286	3057	1	0	1	5	5	0	8286	3057	5	MT-RNR1	rRNA	1	0	1	1
707	11448	0	C	11436	A	7	3	4	0.06	7	3	4	11436	8301	3135	1	0	1	4	4	0	8301	3135	4	MT-RNR1	rRNA	1	0	1	1
708	11494	0	C	11478	A	9	6	3	0.08	9	6	3	11478	8300	3178	2	1	1	5	3	2	8300	3178	3	MT-RNR1	rRNA	1	0	1	1
709	11849	0	G	11833	T	9	7	2	0.08	6	2	4	1	0	1	11833	8437	3396	9	7	2	8437	3396	1	MT-RNR1	rRNA	1	0	1	1
710	11783	0	T	11769	A	5	1	4	0.04	5	1	4	5	3	2	4	0	4	11769	8375	3394	8375	3394	0	MT-RNR1	rRNA	0	0	1	1
711	11780	0	T	11772	G	5	1	4	0.04	2	1	1	1	0	1	5	1	4	11772	8329	3443	8329	3443	0	MT-RNR1	rRNA	0	0	1	1
712	11915	0	C	11899	A	9	8	1	0.08	9	8	1	11899	8274	3625	2	0	2	5	2	3	8274	3625	0	MT-RNR1	rRNA	0	0	1	1
713	11880	0	C	11870	A	6	3	3	0.05	6	3	3	11870	8265	3605	2	1	1	2	2	0	8265	3605	0	MT-RNR1	rRNA	0	0	1	1
714	11970	0	A	11962	T	5	3	2	0.04	11962	8304	3658	1	1	0	2	1	1	5	3	2	8304	3658	0	MT-RNR1	rRNA	0	0	1	1
715	12243	0	G	12236	A	3	3	0	0.02	3	3	0	1	1	0	12236	8480	3756	3	2	1	8480	3756	0	MT-RNR1	rRNA	0	0	1	1
716	12450	0	T	12440	C	7	6	1	0.06	2	2	0	7	6	1	1	1	0	12440	8421	4019	8421	4019	0	MT-RNR1	rRNA	0	0	1	1
717	12487	0	G	12480	T	5	4	1	0.04	0	0	0	2	0	2	12480	8396	4084	5	4	1	8396	4084	0	MT-RNR1	rRNA	0	0	1	1
718	12610	0	A	12607	T	2	0	2	0.02	12607	8391	4216	1	1	0	0	0	0	2	0	2	8391	4216	0	MT-RNR1	rRNA	0	0	1	1
719	13103	0	G	13096	T	5	4	1	0.04	1	1	0	1	1	0	13096	8504	4592	5	4	1	8504	4592	0	MT-RNR1	rRNA	0	0	1	1
720	13215	0	T	13212	C	3	0	3	0.02	0	0	0	3	0	3	0	0	0	13212	8469	4743	8469	4743	0	MT-RNR1	rRNA	0	0	1	1
721	13416	0	T	13412	C	2	1	1	0.01	0	0	0	2	1	1	2	1	1	13412	8522	4890	8522	4890	0	MT-RNR1	rRNA	0	0	1	1
722	13724	0	C	13721	A	2	1	1	0.01	2	1	1	13721	8523	5198	0	0	0	1	1	0	8523	5198	0	MT-RNR1	rRNA	0	0	1	1
723	12461	0	A	12450	G	6	3	3	0.05	12450	8559	3891	2	1	1	6	3	3	3	1	2	8559	3891	0	MT-RNR1	rRNA	0	0	1	1
724	14106	1	C	14100	A	5	3	2	0.04	5	3	2	14100	8515	5585	0	0	0	1	1	0	8515	5585	0	MT-RNR1	rRNA	0	0	1	1
725	14129	0	C	14122	T	4	2	2	0.03	3	1	2	14122	8509	5613	0	0	0	4	2	2	8509	5613	0	MT-RNR1	rRNA	0	0	1	1
726	14192	0	C	14175	A	11	7	4	0.08	11	7	4	14175	8598	5577	0	0	0	6	1	5	8598	5577	0	MT-RNR1	rRNA	0	0	1	1
727	14094	0	T	14088	C	3	0	3	0.02	0	0	0	3	0	3	3	1	2	14088	8608	5480	8608	5480	0	MT-RNR1	rRNA	0	0	1	1
728	14237	0	C	14231	A	4	1	3	0.03	4	1	3	14231	8657	5574	0	0	0	2	2	0	8657	5574	0	MT-RNR1	rRNA	0	0	1	1
729	14270	0	T	14268	C	1	1	0	0.01	0	0	0	1	1	0	1	0	1	14268	8665	5603	8665	5603	0	MT-RNR1	rRNA	0	0	1	1
730	14388	1	A	14384	C	2	1	1	0.01	14384	8670	5714	2	1	1	2	1	1	0	0	0	8670	5714	0	MT-RNR1	rRNA	0	0	1	1
731	14359	0	A	14357	G	2	1	1	0.01	14357	8650	5707	0	0	0	2	1	1	0	0	0	8650	5707	0	MT-RNR1	rRNA	0	0	1	1
732	14264	0	A	14263	G	1	0	1	0.01	14263	8664	5599	0	0	0	1	0	1	0	0	0	8664	5599	0	MT-RNR1	rRNA	0	0	1	1
733	13870	0	T	13869	C	1	1	0	0.01	0	0	0	1	1	0	0	0	0	13869	8656	5213	8656	5213	0	MT-RNR1	rRNA	0	0	1	1
734	14229	0	C	14222	A	6	3	3	0.04	6	3	3	14222	8641	5581	0	0	0	1	1	0	8641	5581	0	MT-RNR1	rRNA	0	0	1	1
735	13289	0	A	13282	G	5	2	3	0.04	13282	8622	4660	0	0	0	5	2	3	2	0	2	8622	4660	0	MT-RNR1	rRNA	0	0	1	1
736	14614	0	C	14608	A	3	2	1	0.02	3	2	1	14608	8864	5744	0	0	0	3	3	0	8864	5744	0	MT-RNR1	rRNA	0	0	1	1
737	14659	0	C	14651	A	6	5	1	0.04	6	5	1	14651	8975	5676	0	0	0	2	2	0	8975	5676	0	MT-RNR1	rRNA	0	0	1	1
738	14516	0	A	14512	G	3	2	1	0.02	14512	8952	5560	0	0	0	3	2	1	1	1	0	8952	5560	0	MT-RNR1	rRNA	0	0	1	1
739	14685	0	C	14671	A	7	3	4	0.05	7	3	4	14671	9001	5670	1	1	0	6	4	2	9001	5670	0	MT-RNR1	rRNA	0	0	1	1
740	14722	0	G	14710	T	9	7	2	0.06	3	2	1	0	0	0	14710	8975	5735	9	7	2	8975	5735	0	MT-RNR1	rRNA	0	0	1	1
741	14710	0	A	14705	C	2	1	1	0.01	14705	8977	5728	2	1	1	2	1	1	1	0	1	8977	5728	0	MT-RNR1	rRNA	0	0	1	1
742	14588	0	T	14583	A	2	1	1	0.01	2	1	1	1	1	0	2	0	2	14583	9039	5544	9039	5544	0	MT-RNR1	rRNA	0	0	1	1
743	14816	0	C	14808	A	4	3	1	0.03	4	3	1	14808	9056	5752	0	0	0	4	2	2	9056	5752	2	MT-RNR1	rRNA	1	0	1	1
744	14847	0	A	14844	G	2	0	2	0.01	14844	9061	5783	1	0	1	2	0	2	0	0	0	9061	5783	6	MT-RNR1	rRNA	1	0	1	1
745	14861	0	A	14860	G	1	1	0	0.01	14860	9078	5782	0	0	0	1	1	0	0	0	0	9078	5782	5	MT-RNR1	rRNA	1	0	1	1
746	14904	0	A	14901	G	2	1	1	0.01	14901	9110	5791	0	0	0	2	1	1	1	1	0	9110	5791	4	MT-RNR1	rRNA	1	0	1	1
747	14868	0	A	14862	G	3	0	3	0.02	14862	9120	5742	1	1	0	3	0	3	2	0	2	9120	5742	3	MT-RNR1	rRNA	1	0	1	1
748	14775	0	G	14759	T	10	8	2	0.07	6	1	5	0	0	0	14759	9190	5569	10	8	2	9190	5569	1	MT-RNR1	rRNA	1	0	1	1
749	14707	0	G	14691	T	10	7	3	0.07	3	2	1	3	2	1	14691	9187	5504	10	7	3	9187	5504	0	MT-RNR1	rRNA	0	0	1	1
750	14596	0	G	14591	T	2	2	0	0.01	1	0	1	2	2	0	14591	9166	5425	2	2	0	9166	5425	0	MT-RNR1	rRNA	0	0	1	1
751	14410	0	A	14392	G	10	3	7	0.07	14392	9059	5333	6	0	6	10	3	7	2	1	1	9059	5333	0	MT-RNR1	rRNA	0	0	1	1
752	14794	0	C	14786	A	5	4	1	0.03	5	4	1	14786	9369	5417	0	0	0	3	1	2	9369	5417	0	MT-RNR1	rRNA	0	0	1	1
753	14774	0	A	14762	G	11	1	10	0.07	14762	9380	5382	0	0	0	11	1	10	1	0	1	9380	5382	0	MT-RNR1	rRNA	0	0	1	1
754	14786	0	A	14781	G	4	1	3	0.03	14781	9382	5399	0	0	0	4	1	3	1	0	1	9382	5399	0	MT-RNR1	rRNA	0	0	1	1
755	14790	0	G	14778	T	7	6	1	0.05	4	4	0	1	0	1	14778	9383	5395	7	6	1	9383	5395	0	MT-RNR1	rRNA	0	0	1	1
756	14721	3	C	14710	G	6	6	0	0.04	5	3	2	14710	9347	5363	6	6	0	0	0	0	9347	5363	0	MT-RNR1	rRNA	0	0	1	1
757	14764	0	A	14757	G	5	0	5	0.03	14757	9436	5321	0	0	0	5	0	5	2	0	2	9436	5321	0	MT-RNR1	rRNA	0	0	1	1
758	14817	0	T	14810	C	6	3	3	0.04	1	0	1	6	3	3	0	0	0	14810	9444	5366	9444	5366	0	MT-RNR1	rRNA	0	0	1	1
759	15193	1	C	15182	A	7	4	3	0.05	7	4	3	15182	9715	5467	2	1	1	2	1	1	9715	5467	0	MT-RNR1	rRNA	0	0	1	1
760	14363	0	A	14341	C	13	13	0	0.09	14341	8865	5476	13	13	0	9	3	6	0	0	0	8865	5476	0	MT-RNR1	rRNA	0	0	1	1
761	12769	0	A	12760	C	7	7	0	0.05	12760	7299	5461	7	7	0	2	1	1	0	0	0	7299	5461	0	MT-RNR1	rRNA	0	0	1	1
762	12408	1	G	12398	C	5	5	0	0.04	1	1	0	5	5	0	12398	6968	5430	4	3	1	6968	5430	0	MT-RNR1	rRNA	0	0	1	1
763	11384	0	C	11355	A	21	16	5	0.18	21	16	5	11355	6046	5309	1	1	0	7	3	4	6046	5309	0	MT-RNR1	rRNA	0	0	1	0
764	11107	0	A	11089	G	16	12	4	0.14	11089	6009	5080	0	0	0	16	12	4	2	1	1	6009	5080	0	MT-RNR1	rRNA	0	0	1	1
765	11126	0	C	11103	A	14	10	4	0.13	14	10	4	11103	5838	5265	3	3	0	6	5	1	5838	5265	0	MT-RNR1	rRNA	0	0	1	1
766	10573	0	G	10552	A	9	7	2	0.09	9	7	2	4	1	3	10552	5332	5220	8	6	2	5332	5220	0	MT-RNR1	rRNA	0	0	1	1
767	10301	0	C	10295	T	4	1	3	0.04	1	0	1	10295	5118	5177	1	0	1	4	1	3	5118	5177	0	MT-RNR1	rRNA	0	0	1	1
768	10299	0	A	10285	G	11	0	11	0.11	10285	5059	5226	1	1	0	11	0	11	2	0	2	5059	5226	0	MT-RNR1	rRNA	0	0	1	1
769	10477	0	G	10463	T	9	5	4	0.09	3	2	1	2	2	0	10463	5057	5406	9	5	4	5057	5406	0	MT-RNR1	rRNA	0	0	1	1
770	10331	4	C	10322	A	5	2	3	0.05	5	2	3	10322	4977	5345	2	1	1	2	1	1	4977	5345	0	MT-RNR1	rRNA	0	0	1	1
771	10364	0	A	10353	G	9	5	4	0.09	10353	4985	5368	1	0	1	9	5	4	1	1	0	4985	5368	0	MT-RNR1	rRNA	0	0	1	1
772	10121	0	A	10115	G	3	1	2	0.03	10115	4708	5407	1	1	0	3	1	2	2	0	2	4708	5407	0	MT-RNR1	rRNA	0	0	1	1
773	10107	0	T	10099	C	7	4	3	0.07	0	0	0	7	4	3	1	0	1	10099	4592	5507	4592	5507	0	MT-RNR1	rRNA	0	0	1	1
774	10202	0	G	10192	T	6	3	3	0.06	2	2	0	2	0	2	10192	4614	5578	6	3	3	4614	5578	0	MT-RNR1	rRNA	0	0	1	1
775	10226	0	C	10217	A	6	6	0	0.06	6	6	0	10217	4625	5592	0	0	0	3	1	2	4625	5592	0	MT-RNR1	rRNA	0	0	1	1
776	10172	0	A	10167	G	4	1	3	0.04	10167	4588	5579	1	0	1	4	1	3	0	0	0	4588	5579	0	MT-RNR1	rRNA	0	0	1	1
777	9874	0	G	9868	T	3	1	2	0.03	1	0	1	2	1	1	9868	4319	5549	3	1	2	4319	5549	0	MT-RNR1	rRNA	0	0	1	1
778	9813	0	C	9808	T	3	1	2	0.03	2	2	0	9808	4319	5489	0	0	0	3	1	2	4319	5489	0	MT-RNR1	rRNA	0	0	1	1
779	9523	0	T	9515	G	6	0	6	0.06	1	0	1	1	1	0	6	0	6	9515	4232	5283	4232	5283	0	MT-RNR1	rRNA	0	0	1	1
780	9793	0	C	9786	T	4	2	2	0.04	3	2	1	9786	4279	5507	0	0	0	4	2	2	4279	5507	2	MT-RNR1	rRNA	1	0	1	1
781	9935	2	A	9933	T	1	0	1	0.01	9933	4298	5635	0	0	0	1	0	1	1	0	1	4298	5635	6	MT-RNR1	rRNA	1	0	1	1
782	9970	0	A	9967	C	2	1	1	0.02	9967	4339	5628	2	1	1	1	0	1	0	0	0	4339	5628	5	MT-RNR1	rRNA	1	0	1	1
783	9734	0	A	9732	G	2	1	1	0.02	9732	4122	5610	0	0	0	2	1	1	0	0	0	4122	5610	4	MT-RNR1	rRNA	1	0	1	1
784	9266	0	A	9261	G	3	0	3	0.03	9261	4058	5203	2	1	1	3	0	3	0	0	0	4058	5203	3	MT-RNR1	rRNA	1	0	1	1
785	9630	0	C	9626	A	4	1	3	0.04	4	1	3	9626	4054	5572	0	0	0	0	0	0	4054	5572	1	MT-RNR1	rRNA	1	0	1	1
786	9584	0	G	9578	T	4	1	3	0.04	1	1	0	1	0	1	9578	4035	5543	4	1	3	4035	5543	0	MT-RNR1	rRNA	0	0	1	1
787	9647	0	C	9647	A	0	0	0	0	0	0	0	9647	4072	5575	0	0	0	0	0	0	4072	5575	0	MT-RNR1	rRNA	0	0	1	1
788	9661	0	T	9655	A	3	0	3	0.03	3	0	3	1	0	1	2	0	2	9655	4045	5610	4045	5610	0	MT-RNR1	rRNA	0	0	1	1
789	9561	0	T	9558	A	1	1	0	0.01	1	1	0	1	1	0	1	0	1	9558	4032	5526	4032	5526	0	MT-RNR1	rRNA	0	0	1	1
790	9495	0	A	9491	G	2	2	0	0.02	9491	3921	5570	1	1	0	2	2	0	1	1	0	3921	5570	0	MT-RNR1	rRNA	0	0	1	1
791	9493	0	G	9489	T	2	0	2	0.02	0	0	0	2	0	2	9489	3918	5571	2	0	2	3918	5571	0	MT-RNR1	rRNA	0	0	1	1
792	9459	0	C	9454	A	3	2	1	0.03	3	2	1	9454	3839	5615	0	0	0	2	1	1	3839	5615	0	MT-RNR1	rRNA	0	0	1	1
793	9486	0	C	9472	A	7	2	5	0.07	7	2	5	9472	3890	5582	0	0	0	7	4	3	3890	5582	0	MT-RNR1	rRNA	0	0	1	1
794	9520	0	T	9505	C	11	0	11	0.12	0	0	0	11	0	11	4	0	4	9505	3852	5653	3852	5653	0	MT-RNR1	rRNA	0	0	1	1
795	9537	0	A	9532	G	3	1	2	0.03	9532	3838	5694	0	0	0	3	1	2	2	0	2	3838	5694	0	MT-RNR1	rRNA	0	0	1	1
796	9507	0	G	9491	T	11	3	8	0.12	3	0	3	2	2	0	9491	3836	5655	11	3	8	3836	5655	0	MT-RNR1	rRNA	0	0	1	1
797	9039	0	C	9021	A	11	7	4	0.12	11	7	4	9021	3808	5213	1	1	0	6	1	5	3808	5213	0	MT-RNR1	rRNA	0	0	1	1
798	8674	0	C	8663	G	5	1	4	0.06	3	1	2	8663	3565	5098	5	1	4	3	1	2	3565	5098	0	MT-RNR1	rRNA	0	0	1	1
799	8295	0	A	8285	G	7	5	2	0.08	8285	3517	4768	1	0	1	7	5	2	2	0	2	3517	4768	0	MT-RNR1	rRNA	0	0	1	1
800	8402	0	C	8394	A	3	2	1	0.04	3	2	1	8394	3511	4883	3	2	1	2	2	0	3511	4883	0	MT-RNR1	rRNA	0	0	1	1
801	7710	0	A	7685	G	18	4	14	0.23	7685	3481	4204	5	5	0	18	4	14	2	1	1	3481	4204	2	MT-RNR1	rRNA	1	0	1	1
802	8468	3	C	8455	T	10	6	4	0.12	2	1	1	8455	3459	4996	1	1	0	10	6	4	3459	4996	2	MT-RNR1	rRNA	1	0	1	1
803	8472	0	C	8454	A	12	4	8	0.14	12	4	8	8454	3408	5046	0	0	0	6	1	5	3408	5046	5	MT-RNR1	rRNA	1	0	1	1
804	8504	0	C	8488	A	8	2	6	0.09	8	2	6	8488	3426	5062	5	3	2	3	3	0	3426	5062	4	MT-RNR1	rRNA	1	0	1	1
805	8341	0	C	8327	A	9	3	6	0.11	9	3	6	8327	3275	5052	3	0	3	2	2	0	3275	5052	3	MT-RNR1	rRNA	1	0	1	1
806	8294	0	C	8274	A	8	2	6	0.1	8	2	6	8274	3270	5004	8	0	8	4	0	4	3270	5004	1	MT-RNR1	rRNA	1	0	1	1
807	8282	0	A	8262	G	12	4	8	0.14	8262	3238	5024	6	1	5	12	4	8	2	0	2	3238	5024	1	MT-RNR1	rRNA	1	0	1	1
808	8447	7	C	8424	A	14	6	8	0.17	14	6	8	8424	3431	4993	4	2	2	5	2	3	3431	4993	0	MT-RNR1	rRNA	0	0	1	0
809	8241	0	G	8229	A	6	1	5	0.07	6	1	5	0	0	0	8229	3376	4853	6	3	3	3376	4853	0	MT-RNR1	rRNA	0	0	1	1
810	8260	0	G	8249	T	6	3	3	0.07	4	1	3	1	0	1	8249	3435	4814	6	3	3	3435	4814	0	MT-RNR1	rRNA	0	0	1	1
811	8198	0	G	8190	T	6	5	1	0.07	2	1	1	0	0	0	8190	3475	4715	6	5	1	3475	4715	0	MT-RNR1	rRNA	0	0	1	1
812	8128	0	A	8121	G	3	0	3	0.04	8121	3510	4611	2	0	2	3	0	3	2	0	2	3510	4611	0	MT-RNR1	rRNA	0	0	1	1
813	8139	0	A	8111	G	26	1	25	0.32	8111	3506	4605	0	0	0	26	1	25	2	0	2	3506	4605	0	MT-RNR1	rRNA	0	0	1	1
814	8005	0	A	7997	G	8	1	7	0.1	7997	3498	4499	0	0	0	8	1	7	0	0	0	3498	4499	0	MT-RNR1	rRNA	0	0	1	1
815	7829	0	C	7824	A	2	2	0	0.03	2	2	0	7824	3338	4486	1	1	0	2	0	2	3338	4486	0	MT-RNR1	rRNA	0	0	1	1
816	7482	0	A	7475	G	4	1	3	0.05	7475	3331	4144	0	0	0	4	1	3	3	0	3	3331	4144	0	MT-RNR1	rRNA	0	0	1	1
817	7572	0	G	7557	T	13	6	7	0.17	2	1	1	0	0	0	7557	3354	4203	13	6	7	3354	4203	0	MT-RNR1	rRNA	0	0	1	0
818	7596	1	C	7572	A	18	10	8	0.24	18	10	8	7572	3531	4041	4	1	3	2	0	2	3531	4041	0	MT-RNR1	rRNA	0	0	1	0
819	7118	0	A	7076	G	38	4	34	0.53	7076	3471	3605	2	1	1	38	4	34	2	1	1	3471	3605	0	MT-RNR1	rRNA	0	0	1	1
820	6970	0	G	6948	A	10	2	8	0.14	10	2	8	5	1	4	6948	3516	3432	7	2	5	3516	3432	0	MT-RNR1	rRNA	0	0	1	1
821	6403	1	T	6363	A	21	5	16	0.33	21	5	16	13	2	11	6	1	5	6363	3375	2988	3375	2988	0	MT-RNR1	rRNA	0	0	1	0
822	6466	0	G	6456	T	5	4	1	0.08	4	0	4	1	0	1	6456	3471	2985	5	4	1	3471	2985	0	MT-RNR1	rRNA	0	0	1	1
823	6357	0	A	6343	G	13	1	12	0.2	6343	3499	2844	1	1	0	13	1	12	0	0	0	3499	2844	0	MT-RNR1	rRNA	0	0	1	1
824	6396	0	T	6372	A	20	0	20	0.31	20	0	20	0	0	0	4	0	4	6372	3556	2816	3556	2816	0	MT-RNR1	rRNA	0	0	1	1
825	6379	0	T	6362	A	8	1	7	0.13	8	1	7	7	5	2	2	0	2	6362	3575	2787	3575	2787	0	MT-RNR1	rRNA	0	0	1	1
826	6266	0	A	6265	G	1	1	0	0.02	6265	3507	2758	0	0	0	1	1	0	0	0	0	3507	2758	0	MT-RNR1	rRNA	0	0	1	1
827	6162	0	A	6160	G	2	1	1	0.03	6160	3490	2670	0	0	0	2	1	1	0	0	0	3490	2670	0	MT-RNR1	rRNA	0	0	1	1
828	6261	0	C	6257	T	2	1	1	0.03	1	1	0	6257	3431	2826	1	1	0	2	1	1	3431	2826	0	MT-RNR1	rRNA	0	0	1	1
829	6252	0	C	6245	A	5	3	2	0.08	5	3	2	6245	3492	2753	0	0	0	2	0	2	3492	2753	0	MT-RNR1	rRNA	0	0	1	1
830	6266	0	T	6259	G	5	0	5	0.08	0	0	0	2	2	0	5	0	5	6259	3517	2742	3517	2742	0	MT-RNR1	rRNA	0	0	1	1
831	6600	0	T	6599	C	1	1	0	0.02	0	0	0	1	1	0	0	0	0	6599	3538	3061	3538	3061	0	MT-RNR1	rRNA	0	0	1	1
832	6562	0	T	6559	C	2	1	1	0.03	1	0	1	2	1	1	0	0	0	6559	3523	3036	3523	3036	0	MT-RNR1	rRNA	0	0	1	1
833	6614	0	A	6612	C	1	0	1	0.02	6612	3529	3083	1	0	1	1	0	1	0	0	0	3529	3083	0	MT-RNR1	rRNA	0	0	1	1
834	6614	0	G	6599	C	7	1	6	0.11	4	4	0	7	1	6	6599	3512	3087	4	3	1	3512	3087	0	MT-RNR1	rRNA	0	0	1	1
835	7005	0	C	6985	A	12	10	2	0.17	12	10	2	6985	3551	3434	4	4	0	4	1	3	3551	3434	0	MT-RNR1	rRNA	0	0	1	1
836	7028	0	A	7017	G	8	1	7	0.11	7017	3351	3666	2	2	0	8	1	7	1	0	1	3351	3666	0	MT-RNR1	rRNA	0	0	1	1
837	6910	1	A	6906	G	2	1	1	0.03	6906	3207	3699	1	0	1	2	1	1	1	1	0	3207	3699	0	MT-RNR1	rRNA	0	0	1	1
838	6914	0	T	6901	A	10	2	8	0.14	10	2	8	2	1	1	1	0	1	6901	3219	3682	3219	3682	0	MT-RNR1	rRNA	0	0	1	1
839	6920	0	A	6915	T	3	0	3	0.04	6915	3202	3713	1	1	0	1	0	1	3	0	3	3202	3713	0	MT-RNR1	rRNA	0	0	1	1
840	6851	0	A	6841	C	7	0	7	0.1	6841	3174	3667	7	0	7	3	1	2	0	0	0	3174	3667	0	MT-RNR1	rRNA	0	0	1	1
841	6676	0	A	6667	T	7	0	7	0.1	6667	3160	3507	0	0	0	2	2	0	7	0	7	3160	3507	0	MT-RNR1	rRNA	0	0	1	1
842	7105	0	C	7102	T	2	2	0	0.03	1	0	1	7102	3365	3737	0	0	0	2	2	0	3365	3737	0	MT-RNR1	rRNA	0	0	1	1
843	7091	0	G	7090	T	1	0	1	0.01	0	0	0	0	0	0	7090	3390	3700	1	0	1	3390	3700	0	MT-RNR1	rRNA	0	0	1	1
844	7077	0	A	7073	G	3	0	3	0.04	7073	3313	3760	0	0	0	3	0	3	1	0	1	3313	3760	0	MT-RNR1	rRNA	0	0	1	1
845	7017	0	A	7013	G	3	1	2	0.04	7013	3261	3752	0	0	0	3	1	2	1	0	1	3261	3752	0	MT-RNR1	rRNA	0	0	1	1
846	6902	0	A	6900	C	1	0	1	0.01	6900	3209	3691	1	0	1	1	1	0	0	0	0	3209	3691	0	MT-RNR1	rRNA	0	0	1	1
847	6973	0	G	6971	T	2	0	2	0.03	0	0	0	0	0	0	6971	3303	3668	2	0	2	3303	3668	0	MT-RNR1	rRNA	0	0	1	1
848	6871	0	T	6868	C	3	2	1	0.04	0	0	0	3	2	1	0	0	0	6868	3123	3745	3123	3745	0	MT-RNR1	rRNA	0	0	1	1
849	6886	0	T	6885	C	1	1	0	0.01	0	0	0	1	1	0	0	0	0	6885	3145	3740	3145	3740	0	MT-RNR1	rRNA	0	0	1	1
850	6821	0	T	6820	C	1	0	1	0.01	0	0	0	1	0	1	0	0	0	6820	3136	3684	3136	3684	0	MT-RNR1	rRNA	0	0	1	1
851	6890	0	A	6890	T	0	0	0	0	6890	3137	3753	0	0	0	0	0	0	0	0	0	3137	3753	0	MT-RNR1	rRNA	0	0	1	1
852	6764	0	A	6763	T	1	0	1	0.01	6763	3009	3754	0	0	0	0	0	0	1	0	1	3009	3754	0	MT-RNR1	rRNA	0	0	1	1
853	7061	0	C	7056	A	3	1	2	0.04	3	1	2	7056	3098	3958	1	0	1	1	1	0	3098	3958	0	MT-RNR1	rRNA	0	0	1	1
854	7071	0	T	7069	A	2	0	2	0.03	2	0	2	0	0	0	0	0	0	7069	3104	3965	3104	3965	0	MT-RNR1	rRNA	0	0	1	1
855	7119	0	A	7119	T	0	0	0	0	7119	3092	4027	0	0	0	0	0	0	0	0	0	3092	4027	0	MT-RNR1	rRNA	0	0	1	1
856	7017	0	A	7016	G	1	1	0	0.01	7016	3045	3971	0	0	0	1	1	0	0	0	0	3045	3971	0	MT-RNR1	rRNA	0	0	1	1
857	7093	0	G	7089	T	3	1	2	0.04	0	0	0	1	1	0	7089	3023	4066	3	1	2	3023	4066	0	MT-RNR1	rRNA	0	0	1	1
858	7116	0	C	7108	A	5	1	4	0.07	5	1	4	7108	3051	4057	1	0	1	2	0	2	3051	4057	0	MT-RNR1	rRNA	0	0	1	1
859	7152	0	T	7144	A	5	1	4	0.07	5	1	4	0	0	0	3	0	3	7144	2796	4348	2796	4348	0	MT-RNR1	rRNA	0	0	1	1
860	7067	0	A	7059	T	6	0	6	0.08	7059	2759	4300	0	0	0	2	2	0	6	0	6	2759	4300	0	MT-RNR1	rRNA	0	0	1	1
861	6986	0	T	6981	C	4	0	4	0.06	1	1	0	4	0	4	0	0	0	6981	2757	4224	2757	4224	0	MT-RNR1	rRNA	0	0	1	1
862	6462	0	A	6452	C	5	0	5	0.08	6452	2762	3690	5	0	5	1	0	1	4	2	2	2762	3690	0	MT-RNR1	rRNA	0	0	1	1
863	7309	0	C	7307	A	1	0	1	0.01	1	0	1	7307	2854	4453	0	0	0	1	0	1	2854	4453	0	MT-RNR1	rRNA	0	0	1	1
864	7263	0	T	7253	G	6	1	5	0.08	3	1	2	1	1	0	6	1	5	7253	2850	4403	2850	4403	0	MT-RNR1	rRNA	0	0	1	1
865	6870	0	A	6866	G	4	2	2	0.06	6866	2816	4050	0	0	0	4	2	2	0	0	0	2816	4050	0	MT-RNR1	rRNA	0	0	1	1
866	5916	0	A	5912	G	2	0	2	0.03	5912	2809	3103	1	0	1	2	0	2	1	0	1	2809	3103	2	MT-RNR1	rRNA	1	0	1	1
867	7264	0	C	7260	A	2	0	2	0.03	2	0	2	7260	2738	4522	0	0	0	2	0	2	2738	4522	6	MT-RNR1	rRNA	1	0	1	1
868	7199	4	C	7175	A	23	11	12	0.32	23	11	12	7175	2757	4418	1	0	1	0	0	0	2757	4418	5	MT-RNR1	rRNA	1	0	1	0
869	7063	0	C	7052	A	6	3	3	0.08	6	3	3	7052	2820	4232	2	0	2	3	2	1	2820	4232	4	MT-RNR1	rRNA	1	0	1	1
870	7028	0	C	7010	A	8	1	7	0.11	8	1	7	7010	2844	4166	8	0	8	2	1	1	2844	4166	3	MT-RNR1	rRNA	1	0	1	1
871	7004	2	A	6976	G	25	0	25	0.36	6976	2838	4138	2	0	2	25	0	25	1	0	1	2838	4138	1	MT-RNR1	rRNA	1	0	1	1
872	7006	0	G	6992	T	9	6	3	0.13	5	1	4	0	0	0	6992	2843	4149	9	6	3	2843	4149	0	MT-RNR1	rRNA	0	0	1	1
873	6904	0	G	6881	T	15	6	9	0.22	4	2	2	4	0	4	6881	2827	4054	15	6	9	2827	4054	0	MT-RNR1	rRNA	0	0	1	0
874	6828	0	G	6822	T	4	0	4	0.06	1	1	0	1	0	1	6822	2804	4018	4	0	4	2804	4018	0	MT-RNR1	rRNA	0	0	1	1
875	6663	0	T	6658	A	2	2	0	0.03	2	2	0	1	0	1	2	1	1	6658	2576	4082	2576	4082	0	MT-RNR1	rRNA	0	0	1	1
876	6731	0	T	6724	C	5	1	4	0.07	1	0	1	5	1	4	1	0	1	6724	2737	3987	2737	3987	0	MT-RNR1	rRNA	0	0	1	1
877	6845	0	G	6836	T	5	4	1	0.07	1	1	0	3	3	0	6836	2754	4082	5	4	1	2754	4082	0	MT-RNR1	rRNA	0	0	1	1
878	6868	0	G	6862	A	2	1	1	0.03	2	1	1	2	0	2	6862	2831	4031	2	1	1	2831	4031	0	MT-RNR1	rRNA	0	0	1	1
879	6733	0	T	6722	C	8	0	8	0.12	1	0	1	8	0	8	2	1	1	6722	2806	3916	2806	3916	0	MT-RNR1	rRNA	0	0	1	1
880	7128	0	C	7118	A	8	4	4	0.11	8	4	4	7118	3059	4059	1	1	0	1	1	0	3059	4059	0	MT-RNR1	rRNA	0	0	1	1
881	7104	0	A	7094	G	9	1	8	0.13	7094	3023	4071	0	0	0	9	1	8	1	1	0	3023	4071	0	MT-RNR1	rRNA	0	0	1	1
882	7058	0	A	7056	T	1	1	0	0.01	7056	3064	3992	0	0	0	1	1	0	1	1	0	3064	3992	0	MT-RNR1	rRNA	0	0	1	1
883	7133	0	T	7130	A	1	0	1	0.01	1	0	1	1	1	0	1	1	0	7130	3105	4025	3105	4025	0	MT-RNR1	rRNA	0	0	1	1
884	7021	3	T	7020	C	1	1	0	0.01	0	0	0	1	1	0	0	0	0	7020	3123	3897	3123	3897	0	MT-RNR1	rRNA	0	0	1	1
885	6617	0	T	6616	C	1	0	1	0.02	0	0	0	1	0	1	0	0	0	6616	3094	3522	3094	3522	0	MT-RNR1	rRNA	0	0	1	1
886	7030	0	C	7025	A	4	2	2	0.06	4	2	2	7025	3054	3971	0	0	0	1	1	0	3054	3971	0	MT-RNR1	rRNA	0	0	1	1
887	7168	0	G	7165	T	2	1	1	0.03	1	0	1	0	0	0	7165	3049	4116	2	1	1	3049	4116	0	MT-RNR1	rRNA	0	0	1	1
888	6938	1	T	6935	C	2	1	1	0.03	1	1	0	2	1	1	0	0	0	6935	3017	3918	3017	3918	0	MT-RNR1	rRNA	0	0	1	1
889	6961	0	G	6952	T	6	5	1	0.09	1	1	0	2	2	0	6952	3058	3894	6	5	1	3058	3894	0	MT-RNR1	rRNA	0	0	1	1
890	7122	0	C	7116	T	3	1	2	0.04	2	2	0	7116	3088	4028	1	1	0	3	1	2	3088	4028	0	MT-RNR1	rRNA	0	0	1	1
891	7088	0	C	7085	A	2	0	2	0.03	2	0	2	7085	3116	3969	1	0	1	0	0	0	3116	3969	0	MT-RNR1	rRNA	0	0	1	1
892	6952	0	A	6948	G	2	1	1	0.03	6948	3043	3905	1	1	0	2	1	1	1	0	1	3043	3905	0	MT-RNR1	rRNA	0	0	1	1
893	7008	0	G	7001	T	4	0	4	0.06	2	1	1	1	1	0	7001	3029	3972	4	0	4	3029	3972	0	MT-RNR1	rRNA	0	0	1	1
894	6919	0	C	6911	A	7	4	3	0.1	7	4	3	6911	3024	3887	0	0	0	1	1	0	3024	3887	0	MT-RNR1	rRNA	0	0	1	1
895	6805	0	C	6793	A	9	5	4	0.13	9	5	4	6793	3037	3756	2	2	0	1	1	0	3037	3756	0	MT-RNR1	rRNA	0	0	1	1
896	6350	0	A	6345	G	5	1	4	0.08	6345	3021	3324	0	0	0	5	1	4	0	0	0	3021	3324	0	MT-RNR1	rRNA	0	0	1	1
897	6923	0	C	6918	T	3	3	0	0.04	2	1	1	6918	3062	3856	0	0	0	3	3	0	3062	3856	0	MT-RNR1	rRNA	0	0	1	1
898	6920	0	C	6913	A	5	3	2	0.07	5	3	2	6913	3107	3806	0	0	0	2	0	2	3107	3806	0	MT-RNR1	rRNA	0	0	1	1
899	6939	1	G	6930	T	4	1	3	0.06	3	3	0	2	1	1	6930	3106	3824	4	1	3	3106	3824	0	MT-RNR1	rRNA	0	0	1	1
900	6999	0	C	6990	T	5	1	4	0.07	3	2	1	6990	3093	3897	1	0	1	5	1	4	3093	3897	0	MT-RNR1	rRNA	0	0	1	1
901	7031	1	G	7028	A	2	0	2	0.03	2	0	2	0	0	0	7028	3112	3916	1	0	1	3112	3916	0	MT-RNR1	rRNA	0	0	1	1
902	6928	0	G	6913	T	8	4	4	0.12	5	5	0	2	1	1	6913	3117	3796	8	4	4	3117	3796	0	MT-RNR1	rRNA	0	0	1	1
903	6740	0	T	6709	C	19	1	18	0.28	3	1	2	19	1	18	9	3	6	6709	2959	3750	2959	3750	0	MT-RNR1	rRNA	0	0	1	1
904	6878	0	C	6864	A	8	3	5	0.12	8	3	5	6864	3101	3763	2	1	1	4	0	4	3101	3763	0	MT-RNR1	rRNA	0	0	1	1
905	6916	0	A	6892	G	17	3	14	0.25	6892	3139	3753	1	1	0	17	3	14	6	3	3	3139	3753	0	MT-RNR1	rRNA	0	0	1	1
906	7116	0	C	7108	T	5	3	2	0.07	1	1	0	7108	3329	3779	2	2	0	5	3	2	3329	3779	0	MT-RNR1	rRNA	0	0	1	1
907	6976	0	A	6967	C	4	3	1	0.06	6967	3319	3648	4	3	1	3	3	0	2	0	2	3319	3648	0	MT-RNR1	rRNA	0	0	1	1
908	6925	0	C	6916	A	5	2	3	0.07	5	2	3	6916	3177	3739	3	3	0	1	0	1	3177	3739	0	MT-RNR1	rRNA	0	0	1	1
909	6863	0	G	6855	A	5	2	3	0.07	5	2	3	0	0	0	6855	3191	3664	3	0	3	3191	3664	0	MT-RNR1	rRNA	0	0	1	1
910	6861	0	A	6854	G	5	1	4	0.07	6854	3137	3717	0	0	0	5	1	4	2	1	1	3137	3717	0	MT-RNR1	rRNA	0	0	1	1
911	6870	0	T	6865	G	3	0	3	0.04	1	0	1	1	1	0	3	0	3	6865	3119	3746	3119	3746	0	MT-RNR1	rRNA	0	0	1	1
912	6713	0	T	6706	A	3	1	2	0.04	3	1	2	3	2	1	1	0	1	6706	3079	3627	3079	3627	0	MT-RNR1	rRNA	0	0	1	1
913	6743	0	A	6741	C	1	0	1	0.01	6741	3074	3667	1	0	1	1	1	0	0	0	0	3074	3667	0	MT-RNR1	rRNA	0	0	1	1
914	6391	0	A	6390	T	1	0	1	0.02	6390	3083	3307	0	0	0	0	0	0	1	0	1	3083	3307	0	MT-RNR1	rRNA	0	0	1	1
915	6844	0	C	6839	T	3	3	0	0.04	2	1	1	6839	3121	3718	0	0	0	3	3	0	3121	3718	0	MT-RNR1	rRNA	0	0	1	1
916	6838	0	C	6831	A	6	3	3	0.09	6	3	3	6831	3135	3696	1	1	0	0	0	0	3135	3696	0	MT-RNR1	rRNA	0	0	1	1
917	6780	0	C	6766	A	13	8	5	0.19	13	8	5	6766	3149	3617	1	1	0	0	0	0	3149	3617	0	MT-RNR1	rRNA	0	0	1	0
918	6701	0	A	6694	G	6	2	4	0.09	6694	2969	3725	1	0	1	6	2	4	0	0	0	2969	3725	0	MT-RNR1	rRNA	0	0	1	1
919	6732	0	A	6727	G	3	0	3	0.04	6727	2959	3768	2	1	1	3	0	3	0	0	0	2959	3768	0	MT-RNR1	rRNA	0	0	1	1
920	6773	0	G	6770	A	1	0	1	0.01	1	0	1	1	0	1	6770	3004	3766	1	1	0	3004	3766	0	MT-RNR1	rRNA	0	0	1	1
921	6531	0	T	6526	A	4	1	3	0.06	4	1	3	1	1	0	0	0	0	6526	2962	3564	2962	3564	0	MT-RNR1	rRNA	0	0	1	1
922	6624	0	C	6614	A	7	0	7	0.11	7	0	7	6614	2983	3631	1	1	0	2	0	2	2983	3631	0	MT-RNR1	rRNA	0	0	1	1
923	6632	0	A	6630	T	1	0	1	0.02	6630	2956	3674	1	0	1	0	0	0	1	0	1	2956	3674	0	MT-RNR1	rRNA	0	0	1	1
924	6592	0	A	6591	T	1	0	1	0.02	6591	2926	3665	0	0	0	0	0	0	1	0	1	2926	3665	0	MT-RNR1	rRNA	0	0	1	1
925	6591	1	T	6590	C	1	1	0	0.02	0	0	0	1	1	0	0	0	0	6590	2954	3636	2954	3636	0	MT-RNR1	rRNA	0	0	1	1
926	6578	0	A	6576	T	1	1	0	0.02	6576	2960	3616	0	0	0	1	1	0	1	1	0	2960	3616	0	MT-RNR1	rRNA	0	0	1	1
927	6586	0	G	6584	T	2	2	0	0.03	0	0	0	0	0	0	6584	2960	3624	2	2	0	2960	3624	0	MT-RNR1	rRNA	0	0	1	1
928	6548	0	A	6540	G	6	0	6	0.09	6540	2938	3602	2	1	1	6	0	6	0	0	0	2938	3602	0	MT-RNR1	rRNA	0	0	1	1
929	6619	1	A	6609	G	5	2	3	0.08	6609	2896	3713	4	1	3	5	2	3	1	1	0	2896	3713	0	MT-RNR1	rRNA	0	0	1	1
930	6594	0	G	6590	T	3	1	2	0.05	0	0	0	1	1	0	6590	2879	3711	3	1	2	2879	3711	0	MT-RNR1	rRNA	0	0	1	1
931	6477	0	C	6466	A	8	4	4	0.12	8	4	4	6466	3032	3434	1	1	0	2	0	2	3032	3434	0	MT-RNR1	rRNA	0	0	1	1
932	6572	0	C	6521	A	48	22	26	0.73	48	22	26	6521	3032	3489	2	2	0	1	0	1	3032	3489	0	MT-RNR1	rRNA	0	0	1	0
933	6649	0	G	6612	A	35	4	31	0.53	35	4	31	0	0	0	6612	3108	3504	2	2	0	3108	3504	0	MT-RNR1	rRNA	0	0	1	1
934	6671	0	G	6636	A	26	1	25	0.39	26	1	25	1	0	1	6636	3119	3517	8	6	2	3119	3517	0	MT-RNR1	rRNA	0	0	1	1
935	6292	0	C	6241	G	23	0	23	0.37	20	9	11	6241	3150	3091	23	0	23	8	1	7	3150	3091	0	MT-RNR1	rRNA	0	0	1	1
936	6197	0	G	6178	A	13	1	12	0.21	13	1	12	2	0	2	6178	3280	2898	4	1	3	3280	2898	0	MT-RNR1	rRNA	0	0	1	1
937	6029	0	T	6002	G	16	2	14	0.27	9	6	3	2	2	0	16	2	14	6002	3144	2858	3144	2858	0	MT-RNR1	rRNA	0	0	1	1
938	6212	0	A	6204	T	5	5	0	0.08	6204	3353	2851	0	0	0	3	0	3	5	5	0	3353	2851	0	MT-RNR1	rRNA	0	0	1	1
939	6380	0	A	6369	C	9	6	3	0.14	6369	3411	2958	9	6	3	0	0	0	2	2	0	3411	2958	0	MT-RNR1	rRNA	0	0	1	1
940	6414	0	A	6404	G	7	6	1	0.11	6404	3436	2968	1	1	0	7	6	1	2	0	2	3436	2968	0	MT-RNR1	rRNA	0	0	1	1
941	6447	0	G	6442	T	3	2	1	0.05	2	0	2	0	0	0	6442	3478	2964	3	2	1	3478	2964	0	MT-RNR1	rRNA	0	0	1	1
942	6201	0	A	6198	T	2	1	1	0.03	6198	3284	2914	0	0	0	1	0	1	2	1	1	3284	2914	0	MT-RNR1	rRNA	0	0	1	1
943	6244	0	G	6239	C	3	1	2	0.05	1	0	1	3	1	2	6239	3294	2945	1	0	1	3294	2945	0	MT-RNR1	rRNA	0	0	1	1
944	5810	0	T	5807	C	3	2	1	0.05	0	0	0	3	2	1	0	0	0	5807	2853	2954	2853	2954	0	MT-RNR1	rRNA	0	0	1	1
945	6607	0	G	6604	T	3	2	1	0.05	0	0	0	0	0	0	6604	3626	2978	3	2	1	3626	2978	2	MT-RNR1	rRNA	1	0	1	1
946	6702	0	T	6696	C	3	0	3	0.04	1	0	1	3	0	3	2	0	2	6696	3475	3221	3475	3221	6	MT-RNR1	rRNA	1	0	1	1
947	6942	0	T	6939	C	3	2	1	0.04	0	0	0	3	2	1	0	0	0	6939	3705	3234	3705	3234	5	MT-RNR1	rRNA	1	0	1	1
948	7285	0	T	7282	A	1	0	1	0.01	1	0	1	1	0	1	1	0	1	7282	3725	3557	3725	3557	4	MT-RNR1	rRNA	1	0	1	1
949	7690	0	T	7673	C	8	1	7	0.1	3	0	3	8	1	7	6	0	6	7673	3737	3936	3737	3936	3	MT-RNR1	rRNA	1	0	1	1
950	7704	0	A	7688	C	11	0	11	0.14	7688	3752	3936	11	0	11	3	1	2	2	0	2	3752	3936	1	MT-RNR1	rRNA	1	0	1	1
951	7706	0	G	7690	T	11	1	10	0.14	1	0	1	4	0	4	7690	3759	3931	11	1	10	3759	3931	0	MT-RNR1	rRNA	0	0	1	1
952	7504	0	A	7491	C	9	1	8	0.12	7491	3800	3691	9	1	8	1	1	0	3	0	3	3800	3691	0	MT-RNR1	rRNA	0	0	1	1
953	7344	2	T	7339	C	3	2	1	0.04	2	0	2	3	2	1	0	0	0	7339	3712	3627	3712	3627	0	MT-RNR1	rRNA	0	0	1	1
954	7304	3	C	7299	T	3	2	1	0.04	2	2	0	7299	3820	3479	0	0	0	3	2	1	3820	3479	0	MT-RNR1	rRNA	0	0	1	1
955	6366	2	A	6336	C	19	11	8	0.3	6336	3834	2502	19	11	8	10	7	3	1	0	1	3834	2502	2	MT-RNR1	rRNA	1	0	1	0
956	7589	2	C	7579	T	6	0	6	0.08	3	1	2	7579	3857	3722	1	0	1	6	0	6	3857	3722	2	MT-RNR1	rRNA	1	0	1	1
957	7587	0	C	7577	A	7	3	4	0.09	7	3	4	7577	3977	3600	2	1	1	1	0	1	3977	3600	5	MT-RNR1	rRNA	1	0	1	1
958	7636	1	C	7627	T	5	2	3	0.07	4	1	3	7627	3980	3647	0	0	0	5	2	3	3980	3647	4	MT-RNR1	rRNA	1	0	1	1
959	7264	0	C	7255	A	7	6	1	0.1	7	6	1	7255	3987	3268	1	0	1	1	1	0	3987	3268	3	MT-RNR1	rRNA	1	0	1	1
960	7354	0	C	7343	G	5	3	2	0.07	4	1	3	7343	4063	3280	5	3	2	2	1	1	4063	3280	1	MT-RNR1	rRNA	1	0	1	1
961	7271	0	T	7257	A	6	4	2	0.08	6	4	2	5	2	3	3	0	3	7257	4044	3213	4044	3213	1	MT-RNR1	rRNA	1	0	1	1
962	7513	0	C	7505	T	6	5	1	0.08	2	1	1	7505	4185	3320	0	0	0	6	5	1	4185	3320	6	MT-RNR1	rRNA	1	0	1	1
963	7885	0	C	7875	A	5	3	2	0.06	5	3	2	7875	4114	3761	4	0	4	1	1	0	4114	3761	5	MT-RNR1	rRNA	1	0	1	1
964	7895	0	C	7883	A	8	4	4	0.1	8	4	4	7883	4113	3770	1	0	1	3	2	1	4113	3770	4	MT-RNR1	rRNA	1	0	1	1
965	7886	0	C	7869	A	11	5	6	0.14	11	5	6	7869	4119	3750	2	0	2	4	1	3	4119	3750	3	MT-RNR1	rRNA	1	0	1	0
966	7940	0	A	7911	G	26	2	24	0.33	7911	4154	3757	3	1	2	26	2	24	0	0	0	4154	3757	1	MT-RNR1	rRNA	1	0	1	1
967	7859	0	A	7851	T	4	1	3	0.05	7851	4121	3730	1	1	0	3	1	2	4	1	3	4121	3730	0	MT-RNR1	rRNA	0	0	1	1
968	8024	0	T	8013	G	5	1	4	0.06	3	2	1	3	2	1	5	1	4	8013	4228	3785	4228	3785	0	MT-RNR1	rRNA	0	0	1	1
969	7997	0	A	7991	T	3	2	1	0.04	7991	4173	3818	1	1	0	2	1	1	3	2	1	4173	3818	0	MT-RNR1	rRNA	0	0	1	1
970	8004	0	A	8002	T	1	0	1	0.01	8002	4172	3830	1	1	0	0	0	0	1	0	1	4172	3830	0	MT-RNR1	rRNA	0	0	1	1
971	8028	0	A	8025	C	2	0	2	0.02	8025	4178	3847	2	0	2	1	0	1	0	0	0	4178	3847	0	MT-RNR1	rRNA	0	0	1	1
972	8132	0	G	8119	T	10	2	8	0.12	2	1	1	1	0	1	8119	4287	3832	10	2	8	4287	3832	0	MT-RNR1	rRNA	0	0	1	1
973	8599	0	C	8597	A	2	2	0	0.02	2	2	0	8597	4884	3713	0	0	0	0	0	0	4884	3713	0	MT-RNR1	rRNA	0	0	1	1
974	8517	0	T	8509	A	6	1	5	0.07	6	1	5	1	1	0	1	0	1	8509	4873	3636	4873	3636	2	MT-RNR1	rRNA	1	0	1	1
975	8600	3	A	8596	G	3	2	1	0.03	8596	4893	3703	0	0	0	3	2	1	1	1	0	4893	3703	6	MT-RNR1	rRNA	1	0	1	1
976	8604	0	A	8604	T	0	0	0	0	8604	4901	3703	0	0	0	0	0	0	0	0	0	4901	3703	5	MT-RNR1	rRNA	1	0	1	1
977	8561	0	A	8560	T	1	1	0	0.01	8560	4870	3690	0	0	0	0	0	0	1	1	0	4870	3690	4	MT-RNR1	rRNA	1	0	1	1
978	8300	0	A	8298	C	1	1	0	0.01	8298	4751	3547	1	1	0	1	1	0	0	0	0	4751	3547	3	MT-RNR1	rRNA	1	0	1	1
979	8432	0	C	8424	A	6	4	2	0.07	6	4	2	8424	4760	3664	1	1	0	1	1	0	4760	3664	1	MT-RNR1	rRNA	1	0	1	1
980	8240	0	T	8236	C	3	0	3	0.04	1	1	0	3	0	3	0	0	0	8236	4534	3702	4534	3702	0	MT-RNR1	rRNA	0	0	1	1
981	8304	0	C	8296	A	5	3	2	0.06	5	3	2	8296	4522	3774	0	0	0	3	1	2	4522	3774	0	MT-RNR1	rRNA	0	0	1	1
982	8360	0	A	8355	G	3	1	2	0.04	8355	4443	3912	2	0	2	3	1	2	0	0	0	4443	3912	0	MT-RNR1	rRNA	0	0	1	1
983	8397	0	C	8392	T	3	0	3	0.04	2	2	0	8392	4411	3981	0	0	0	3	0	3	4411	3981	0	MT-RNR1	rRNA	0	0	1	1
984	8471	0	C	8469	A	2	1	1	0.02	2	1	1	8469	4540	3929	0	0	0	0	0	0	4540	3929	0	MT-RNR1	rRNA	0	0	1	1
985	8497	0	T	8493	C	3	1	2	0.04	0	0	0	3	1	2	1	1	0	8493	4537	3956	4537	3956	0	MT-RNR1	rRNA	0	0	1	1
986	8513	0	G	8507	T	5	5	0	0.06	1	1	0	0	0	0	8507	4533	3974	5	5	0	4533	3974	0	MT-RNR1	rRNA	0	0	1	1
987	8704	0	A	8702	T	1	1	0	0.01	8702	4493	4209	0	0	0	1	1	0	1	1	0	4493	4209	0	MT-RNR1	rRNA	0	0	1	1
988	8753	0	G	8747	T	3	3	0	0.03	1	0	1	2	2	0	8747	4521	4226	3	3	0	4521	4226	0	MT-RNR1	rRNA	0	0	1	1
989	8700	0	T	8696	G	2	0	2	0.02	1	1	0	1	1	0	2	0	2	8696	4443	4253	4443	4253	0	MT-RNR1	rRNA	0	0	1	1
990	8717	0	T	8710	C	5	3	2	0.06	1	0	1	5	3	2	1	0	1	8710	4446	4264	4446	4264	0	MT-RNR1	rRNA	0	0	1	1
991	8764	1	G	8756	A	4	3	1	0.05	4	3	1	0	0	0	8756	4480	4276	4	1	3	4480	4276	0	MT-RNR1	rRNA	0	0	1	1
992	8791	0	T	8774	A	10	4	6	0.11	10	4	6	7	6	1	0	0	0	8774	4473	4301	4473	4301	2	MT-RNR1	rRNA	1	0	1	1
993	9029	189	A	9023	G	4	2	2	0.04	9023	4729	4294	0	0	0	4	2	2	2	1	1	4729	4294	2	MT-RNR1	rRNA	1	0	1	1
994	9288	0	A	9282	T	4	2	2	0.04	9282	4946	4336	1	1	0	1	1	0	4	2	2	4946	4336	2	MT-RNR1	rRNA	1	0	1	1
995	9338	0	A	9336	T	1	1	0	0.01	9336	4961	4375	0	0	0	1	1	0	1	1	0	4961	4375	4	MT-RNR1	rRNA	1	0	1	1
996	9347	0	A	9346	T	1	0	1	0.01	9346	4955	4391	0	0	0	0	0	0	1	0	1	4955	4391	3	MT-RNR1	rRNA	1	0	1	1
997	9279	0	A	9277	C	1	0	1	0.01	9277	4899	4378	1	0	1	1	1	0	0	0	0	4899	4378	1	MT-RNR1	rRNA	1	0	1	1
998	9031	0	A	9027	G	2	0	2	0.02	9027	4749	4278	1	1	0	2	0	2	1	0	1	4749	4278	1	MT-RNR1	rRNA	1	0	1	1
999	9591	0	C	9586	A	4	3	1	0.04	4	3	1	9586	4850	4736	0	0	0	1	1	0	4850	4736	1	MT-RNR1	rRNA	1	0	1	1
1000	9513	0	T	9509	C	2	2	0	0.02	1	1	0	2	2	0	1	0	1	9509	4856	4653	4856	4653	0	MT-RNR1	rRNA	0	0	1	1
1001	9568	0	C	9561	A	4	1	3	0.04	4	1	3	9561	4850	4711	0	0	0	3	3	0	4850	4711	0	MT-RNR1	rRNA	0	0	1	1
1002	9577	0	C	9565	A	7	2	5	0.07	7	2	5	9565	4824	4741	1	0	1	4	3	1	4824	4741	0	MT-RNR1	rRNA	0	0	1	1
1003	9504	1	A	9498	T	5	2	3	0.05	9498	4835	4663	0	0	0	1	1	0	5	2	3	4835	4663	0	MT-RNR1	rRNA	0	0	1	1
1004	9539	0	G	9530	T	7	6	1	0.07	1	1	0	1	0	1	9530	4868	4662	7	6	1	4868	4662	0	MT-RNR1	rRNA	0	0	1	1
1005	9549	1	T	9540	A	5	5	0	0.05	5	5	0	4	3	1	0	0	0	9540	4797	4743	4797	4743	0	MT-RNR1	rRNA	0	0	1	1
1006	9651	0	T	9646	G	3	2	1	0.03	0	0	0	2	1	1	3	2	1	9646	4657	4989	4657	4989	0	MT-RNR1	rRNA	0	0	1	1
1007	9650	0	G	9630	T	10	4	6	0.1	6	4	2	4	2	2	9630	4647	4983	10	4	6	4647	4983	0	MT-RNR1	rRNA	0	0	1	1
1008	9539	0	A	9525	G	8	5	3	0.08	9525	4611	4914	1	1	0	8	5	3	5	3	2	4611	4914	0	MT-RNR1	rRNA	0	0	1	1
1009	9570	0	C	9561	A	6	4	2	0.06	6	4	2	9561	4607	4954	2	2	0	1	0	1	4607	4954	0	MT-RNR1	rRNA	0	0	1	1
1010	9625	0	A	9620	G	3	2	1	0.03	9620	4635	4985	2	0	2	3	2	1	0	0	0	4635	4985	0	MT-RNR1	rRNA	0	0	1	1
1011	9749	0	C	9735	A	7	4	3	0.07	7	4	3	9735	4651	5084	0	0	0	7	2	5	4651	5084	2	MT-RNR1	rRNA	1	0	1	1
1012	9981	2	A	9975	G	4	0	4	0.04	9975	4722	5253	1	1	0	4	0	4	1	0	1	4722	5253	6	MT-RNR1	rRNA	1	0	1	1
1013	10118	0	A	10112	G	5	4	1	0.05	10112	4858	5254	0	0	0	5	4	1	1	0	1	4858	5254	5	MT-RNR1	rRNA	1	0	1	1
1014	10145	0	A	10138	G	4	4	0	0.04	10138	4879	5259	2	1	1	4	4	0	1	1	0	4879	5259	4	MT-RNR1	rRNA	1	0	1	1
1015	10103	0	A	10099	T	2	0	2	0.02	10099	4860	5239	0	0	0	2	0	2	2	0	2	4860	5239	3	MT-RNR1	rRNA	1	0	1	1
1016	10098	0	T	10091	C	4	1	3	0.04	3	1	2	4	1	3	0	0	0	10091	4887	5204	4887	5204	1	MT-RNR1	rRNA	1	0	1	1
1017	10037	0	A	10036	G	1	1	0	0.01	10036	4890	5146	0	0	0	1	1	0	0	0	0	4890	5146	0	MT-RNR1	rRNA	0	0	1	1
1018	10056	0	G	10052	A	2	1	1	0.02	2	1	1	0	0	0	10052	4896	5156	2	2	0	4896	5156	0	MT-RNR1	rRNA	0	0	1	1
1019	9910	0	A	9905	G	5	2	3	0.05	9905	4866	5039	0	0	0	5	2	3	0	0	0	4866	5039	0	MT-RNR1	rRNA	0	0	1	1
1020	9840	0	C	9836	A	2	2	0	0.02	2	2	0	9836	4775	5061	0	0	0	2	2	0	4775	5061	0	MT-RNR1	rRNA	0	0	1	1
1021	9795	0	T	9790	A	4	1	3	0.04	4	1	3	0	0	0	1	0	1	9790	4771	5019	4771	5019	0	MT-RNR1	rRNA	0	0	1	1
1022	9764	0	A	9762	G	2	2	0	0.02	9762	4748	5014	0	0	0	2	2	0	0	0	0	4748	5014	0	MT-RNR1	rRNA	0	0	1	1
1023	9765	0	C	9762	A	1	0	1	0.01	1	0	1	9762	4736	5026	1	1	0	1	1	0	4736	5026	0	MT-RNR1	rRNA	0	0	1	1
1024	9731	0	G	9726	T	3	1	2	0.03	2	1	1	0	0	0	9726	4707	5019	3	1	2	4707	5019	0	MT-RNR1	rRNA	0	0	1	1
1025	9680	0	A	9672	G	4	0	4	0.04	9672	4664	5008	1	0	1	4	0	4	3	0	3	4664	5008	0	MT-RNR1	rRNA	0	0	1	1
1026	9666	0	A	9661	C	2	1	1	0.02	9661	4661	5000	2	1	1	2	1	1	1	0	1	4661	5000	0	MT-RNR1	rRNA	0	0	1	1
1027	9622	0	A	9621	G	1	0	1	0.01	9621	4626	4995	0	0	0	1	0	1	0	0	0	4626	4995	0	MT-RNR1	rRNA	0	0	1	1
1028	9608	0	G	9605	A	2	1	1	0.02	2	1	1	0	0	0	9605	4620	4985	1	1	0	4620	4985	0	MT-RNR1	rRNA	0	0	1	1
1029	9365	0	T	9359	A	3	3	0	0.03	3	3	0	1	0	1	2	1	1	9359	4500	4859	4500	4859	0	MT-RNR1	rRNA	0	0	1	1
1030	9399	0	G	9388	T	7	4	3	0.07	4	3	1	0	0	0	9388	4530	4858	7	4	3	4530	4858	0	MT-RNR1	rRNA	0	0	1	1
1031	9208	0	G	9197	A	7	5	2	0.08	7	5	2	1	0	1	9197	4393	4804	3	1	2	4393	4804	0	MT-RNR1	rRNA	0	0	1	1
1032	9102	0	C	9087	A	7	3	4	0.08	7	3	4	9087	4359	4728	6	4	2	2	0	2	4359	4728	0	MT-RNR1	rRNA	0	0	1	1
1033	8984	0	T	8948	A	18	4	14	0.2	18	4	14	3	0	3	15	0	15	8948	4310	4638	4310	4638	0	MT-RNR1	rRNA	0	0	1	1
1034	8917	0	T	8914	G	2	0	2	0.02	1	0	1	0	0	0	2	0	2	8914	4309	4605	4309	4605	0	MT-RNR1	rRNA	0	0	1	1
1035	8833	0	T	8831	C	2	2	0	0.02	0	0	0	2	2	0	0	0	0	8831	4224	4607	4224	4607	0	MT-RNR1	rRNA	0	0	1	1
1036	8704	0	A	8700	T	3	1	2	0.03	8700	4102	4598	0	0	0	1	1	0	3	1	2	4102	4598	0	MT-RNR1	rRNA	0	0	1	1
1037	8639	0	A	8634	G	3	1	2	0.03	8634	4047	4587	0	0	0	3	1	2	2	0	2	4047	4587	0	MT-RNR1	rRNA	0	0	1	1
1038	8538	0	C	8534	A	2	1	1	0.02	2	1	1	8534	3947	4587	1	0	1	1	1	0	3947	4587	0	MT-RNR1	rRNA	0	0	1	1
1039	8403	1	A	8401	T	1	0	1	0.01	8401	3930	4471	0	0	0	1	1	0	1	0	1	3930	4471	0	MT-RNR1	rRNA	0	0	1	1
1040	8368	0	T	8358	C	6	3	3	0.07	1	0	1	6	3	3	3	2	1	8358	3904	4454	3904	4454	0	MT-RNR1	rRNA	0	0	1	1
1041	8312	0	A	8311	G	1	0	1	0.01	8311	3864	4447	0	0	0	1	0	1	0	0	0	3864	4447	0	MT-RNR1	rRNA	0	0	1	1
1042	8286	0	T	8285	G	1	0	1	0.01	0	0	0	0	0	0	1	0	1	8285	3853	4432	3853	4432	0	MT-RNR1	rRNA	0	0	1	1
1043	8213	0	C	8208	A	3	1	2	0.04	3	1	2	8208	3798	4410	1	1	0	1	1	0	3798	4410	0	MT-RNR1	rRNA	0	0	1	1
1044	8165	0	T	8158	C	3	0	3	0.04	2	0	2	3	0	3	2	1	1	8158	3787	4371	3787	4371	0	MT-RNR1	rRNA	0	0	1	1
1045	7736	0	G	7733	A	2	1	1	0.03	2	1	1	1	1	0	7733	3374	4359	0	0	0	3374	4359	0	MT-RNR1	rRNA	0	0	1	1
1046	7408	0	A	7405	G	2	0	2	0.03	7405	3325	4080	1	0	1	2	0	2	0	0	0	3325	4080	8	MT-RNR1	rRNA	1	0	1	1
1047	7350	0	A	7348	G	2	0	2	0.03	7348	3284	4064	0	0	0	2	0	2	0	0	0	3284	4064	9	MT-RNR1	rRNA	1	0	1	1
1048	7027	0	C	7020	A	6	3	3	0.09	6	3	3	7020	3274	3746	0	0	0	1	0	1	3274	3746	10	MT-RNR1	rRNA	1	0	1	1
1049	6600	0	A	6595	G	5	3	2	0.08	6595	3271	3324	0	0	0	5	3	2	0	0	0	3271	3324	11	MT-RNR1	rRNA	1	0	1	1
1050	6583	0	C	6572	A	6	5	1	0.09	6	5	1	6572	3249	3323	4	4	0	1	1	0	3249	3323	12	MT-RNR1	rRNA	1	0	1	1
1051	6562	0	A	6551	G	6	1	5	0.09	6551	3245	3306	1	1	0	6	1	5	4	4	0	3245	3306	13	MT-RNR1	rRNA	1	0	1	1
1052	6499	0	C	6488	T	6	6	0	0.09	2	1	1	6488	3182	3306	3	0	3	6	6	0	3182	3306	14	MT-RNR1	rRNA	1	0	1	1
1053	6474	0	A	6445	G	21	2	19	0.32	6445	3175	3270	6	5	1	21	2	19	2	1	1	3175	3270	7	MT-RNR1	rRNA	1	0	1	1
1054	6276	2	A	6275	C	1	1	0	0.02	6275	3048	3227	1	1	0	0	0	0	0	0	0	3048	3227	7	MT-RNR1	rRNA	1	0	1	1
1055	6233	0	T	6232	G	1	1	0	0.02	0	0	0	0	0	0	1	1	0	6232	3014	3218	3014	3218	0	MT-RNR1	rRNA	0	0	1	1
1056	6215	0	A	6213	C	2	2	0	0.03	6213	3010	3203	2	2	0	0	0	0	0	0	0	3010	3203	0	MT-RNR1	rRNA	0	0	1	1
1057	5942	0	G	5936	T	3	1	2	0.05	1	1	0	2	2	0	5936	2736	3200	3	1	2	2736	3200	0	MT-RNR1	rRNA	0	0	1	1
1058	5909	0	C	5906	A	3	2	1	0.05	3	2	1	5906	2778	3128	0	0	0	0	0	0	2778	3128	0	MT-RNR1	rRNA	0	0	1	1
1059	5848	0	T	5840	C	3	0	3	0.05	2	1	1	3	0	3	3	0	3	5840	2743	3097	2743	3097	0	MT-RNR1	rRNA	0	0	1	1
1060	5823	0	A	5820	G	2	1	1	0.03	5820	2739	3081	0	0	0	2	1	1	1	0	1	2739	3081	0	MT-RNR1	rRNA	0	0	1	1
1061	5803	0	A	5800	G	2	0	2	0.03	5800	2758	3042	0	0	0	2	0	2	1	1	0	2758	3042	0	MT-RNR1	rRNA	0	0	1	1
1062	5485	0	G	5481	T	2	2	0	0.04	1	1	0	1	0	1	5481	2448	3033	2	2	0	2448	3033	0	MT-RNR1	rRNA	0	0	1	1
1063	5051	0	A	5050	C	1	0	1	0.02	5050	2531	2519	1	0	1	0	0	0	0	0	0	2531	2519	0	MT-RNR1	rRNA	0	0	1	1
1064	4987	2	C	4976	A	7	2	5	0.14	7	2	5	4976	2430	2546	4	4	0	0	0	0	2430	2546	0	MT-RNR1	rRNA	0	0	1	1
1065	5062	0	C	5056	A	4	4	0	0.08	4	4	0	5056	2517	2539	0	0	0	2	2	0	2517	2539	0	MT-RNR1	rRNA	0	0	1	1
1066	5054	0	C	5043	A	7	2	5	0.14	7	2	5	5043	2517	2526	0	0	0	4	4	0	2517	2526	0	MT-RNR1	rRNA	0	0	1	1
1067	4974	0	A	4936	G	29	2	27	0.58	4936	2439	2497	3	2	1	29	2	27	6	0	6	2439	2497	0	MT-RNR1	rRNA	0	0	1	1
1068	4816	0	A	4805	G	8	3	5	0.17	4805	2367	2438	0	0	0	8	3	5	3	0	3	2367	2438	0	MT-RNR1	rRNA	0	0	1	1
1069	4796	0	A	4789	G	4	1	3	0.08	4789	2366	2423	2	1	1	4	1	3	1	0	1	2366	2423	0	MT-RNR1	rRNA	0	0	1	1
1070	4686	0	C	4679	A	4	4	0	0.09	4	4	0	4679	2264	2415	3	2	1	0	0	0	2264	2415	0	MT-RNR1	rRNA	0	0	1	1
1071	4498	0	T	4492	G	3	3	0	0.07	2	2	0	1	0	1	3	3	0	4492	2111	2381	2111	2381	0	MT-RNR1	rRNA	0	0	1	1
1072	4472	0	G	4464	A	5	4	1	0.11	5	4	1	0	0	0	4464	2080	2384	3	3	0	2080	2384	0	MT-RNR1	rRNA	0	0	1	1
1073	4004	0	G	4003	T	1	1	0	0.02	0	0	0	0	0	0	4003	1620	2383	1	1	0	1620	2383	0	MT-RNR1	rRNA	0	0	1	1
1074	3984	0	G	3982	T	2	0	2	0.05	0	0	0	0	0	0	3982	1615	2367	2	0	2	1615	2367	0	MT-RNR1	rRNA	0	0	1	1
1075	3904	0	A	3903	T	1	0	1	0.03	3903	1578	2325	0	0	0	0	0	0	1	0	1	1578	2325	0	MT-RNR1	rRNA	0	0	1	1
1076	3872	0	T	3871	G	1	0	1	0.03	0	0	0	0	0	0	1	0	1	3871	1549	2322	1549	2322	0	MT-RNR1	rRNA	0	0	1	1
1077	3891	0	T	3890	C	1	0	1	0.03	0	0	0	1	0	1	0	0	0	3890	1583	2307	1583	2307	0	MT-RNR1	rRNA	0	0	1	1
1078	3873	0	A	3871	G	2	0	2	0.05	3871	1567	2304	0	0	0	2	0	2	0	0	0	1567	2304	0	MT-RNR1	rRNA	0	0	1	1
1079	3806	0	G	3805	T	1	1	0	0.03	0	0	0	0	0	0	3805	1507	2298	1	1	0	1507	2298	0	MT-RNR1	rRNA	0	0	1	1
1080	3717	0	A	3707	G	5	3	2	0.13	3707	1499	2208	2	2	0	5	3	2	3	2	1	1499	2208	0	MT-RNR1	rRNA	0	0	1	1
1081	3603	0	T	3601	C	2	1	1	0.06	0	0	0	2	1	1	0	0	0	3601	1489	2112	1489	2112	0	MT-RNR1	rRNA	0	0	1	1
1082	3381	0	A	3381	T	0	0	0	0	3381	1519	1862	0	0	0	0	0	0	0	0	0	1519	1862	2	MT-RNR1	rRNA	1	0	1	1
1083	3390	0	C	3386	A	4	2	2	0.12	4	2	2	3386	1457	1929	0	0	0	0	0	0	1457	1929	6	MT-RNR1	rRNA	1	0	1	1
1084	3282	0	C	3280	A	1	0	1	0.03	1	0	1	3280	1372	1908	0	0	0	1	0	1	1372	1908	5	MT-RNR1	rRNA	1	0	1	1
1085	3256	0	C	3255	T	1	0	1	0.03	0	0	0	3255	1374	1881	0	0	0	1	0	1	1374	1881	4	MT-RNR1	rRNA	1	0	1	1
1086	3240	0	C	3229	G	7	0	7	0.22	2	0	2	3229	1370	1859	7	0	7	2	1	1	1370	1859	3	MT-RNR1	rRNA	1	0	1	1
1087	2941	0	A	2927	G	13	1	12	0.44	2927	1328	1599	0	0	0	13	1	12	1	0	1	1328	1599	1	MT-RNR1	rRNA	1	0	1	1
1088	2940	0	C	2932	G	5	0	5	0.17	3	1	2	2932	1330	1602	5	0	5	0	0	0	1330	1602	0	MT-RNR1	rRNA	0	0	1	1
1089	2896	0	T	2881	G	9	1	8	0.31	4	0	4	2	0	2	9	1	8	2881	1316	1565	1316	1565	0	MT-RNR1	rRNA	0	0	1	1
1090	2905	0	A	2902	G	3	0	3	0.1	2902	1343	1559	0	0	0	3	0	3	0	0	0	1343	1559	0	MT-RNR1	rRNA	0	0	1	1
1091	2817	0	T	2815	C	2	0	2	0.07	0	0	0	2	0	2	0	0	0	2815	1261	1554	1261	1554	0	MT-RNR1	rRNA	0	0	1	1
1092	2785	0	G	2783	A	1	1	0	0.04	1	1	0	0	0	0	2783	1246	1537	1	1	0	1246	1537	0	MT-RNR1	rRNA	0	0	1	1
1093	2564	0	C	2563	A	1	1	0	0.04	1	1	0	2563	1026	1537	0	0	0	0	0	0	1026	1537	0	MT-RNR1	rRNA	0	0	1	1
1094	2314	0	T	2311	A	1	0	1	0.04	1	0	1	1	1	0	1	0	1	2311	805	1506	805	1506	0	MT-RNR1	rRNA	0	0	1	1
1095	2257	0	T	2256	C	1	0	1	0.04	0	0	0	1	0	1	0	0	0	2256	785	1471	785	1471	0	MT-RNR1	rRNA	0	0	1	1
1096	2217	0	A	2217	T	0	0	0	0	2217	773	1444	0	0	0	0	0	0	0	0	0	773	1444	0	MT-RNR1	rRNA	0	0	1	1
1097	2145	0	G	2141	A	2	0	2	0.09	2	0	2	1	1	0	2141	750	1391	1	1	0	750	1391	0	MT-RNR1	rRNA	0	0	1	1
1098	2093	0	C	2093	A	0	0	0	0	0	0	0	2093	753	1340	0	0	0	0	0	0	753	1340	0	MT-RNR1	rRNA	0	0	1	1
1099	1779	0	C	1777	A	2	0	2	0.11	2	0	2	1777	671	1106	0	0	0	0	0	0	671	1106	0	MT-RNR1	rRNA	0	0	1	1
1100	1733	0	C	1730	A	2	0	2	0.12	2	0	2	1730	672	1058	0	0	0	1	1	0	672	1058	0	MT-RNR1	rRNA	0	0	1	1
1101	1676	0	T	1616	G	33	0	33	1.97	27	0	27	0	0	0	33	0	33	1616	647	969	647	969	0	MT-RNR1	rRNA	0	0	1	1
1102	1615	1	A	1611	G	3	0	3	0.19	1611	646	965	0	0	0	3	0	3	1	0	1	646	965	0	MT-RNR1	rRNA	0	0	1	1
1103	1583	0	A	1582	G	1	1	0	0.06	1582	649	933	0	0	0	1	1	0	0	0	0	649	933	0	MT-RNR1	rRNA	0	0	1	1
1104	1501	0	A	1501	T	0	0	0	0	1501	589	912	0	0	0	0	0	0	0	0	0	589	912	0	MT-RNR1	rRNA	0	0	1	1
1105	1332	0	C	1330	T	1	1	0	0.08	0	0	0	1330	558	772	1	1	0	1	1	0	558	772	0	MT-RNR1	rRNA	0	0	1	1
1106	1101	0	C	1100	A	1	1	0	0.09	1	1	0	1100	579	521	0	0	0	0	0	0	579	521	0	MT-RNR1	rRNA	0	0	1	1
1107	1082	0	T	1070	C	8	1	7	0.74	1	1	0	8	1	7	3	1	2	1070	568	502	568	502	0	MT-RNR1	rRNA	0	0	1	1
1108	1090	0	C	1088	G	2	2	0	0.18	0	0	0	1088	576	512	2	2	0	0	0	0	576	512	0	MT-RNR1	rRNA	0	0	1	1
1109	950	0	A	906	G	32	2	30	3.37	906	470	436	3	0	3	32	2	30	9	0	9	470	436	0	MT-RNR1	rRNA	0	1	1	1
1110	722	0	A	716	G	3	1	2	0.42	716	399	317	2	0	2	3	1	2	1	1	0	399	317	0	MT-RNR1	rRNA	0	1	1	1
1111	616	0	C	610	G	4	3	1	0.65	1	1	0	610	375	235	4	3	1	1	0	1	375	235	0	MT-RNR1	rRNA	0	1	1	1
1112	375	0	A	372	G	3	1	2	0.8	372	304	68	0	0	0	3	1	2	0	0	0	304	68	0	MT-RNR1	rRNA	0	1	1	1
1113	224	0	G	223	A	1	0	1	0.45	1	0	1	0	0	0	223	163	60	0	0	0	163	60	0	MT-RNR1	rRNA	0	1	1	1
1114	183	0	T	181	A	1	0	1	0.55	1	0	1	0	0	0	1	0	1	181	127	54	127	54	0	MT-RNR1	rRNA	0	1	1	1
1115	164	0	T	164	A	0	0	0	0	0	0	0	0	0	0	0	0	0	164	111	53	111	53	0	MT-RNR1	rRNA	0	1	1	1
1116	106	0	A	104	G	2	0	2	1.89	104	55	49	0	0	0	2	0	2	0	0	0	55	49	0	MT-RNR1	rRNA	0	1	1	1
1117	27	0	A	27	T	0	0	0	0	27	21	6	0	0	0	0	0	0	0	0	0	21	6	0	MT-RNR1	rRNA	0	1	1	1
1118	0	0	N	0	N	0	0	0	0	0	0	0	0	0	0	0	0	0	0	0	0	0	0	0	MT-RNR1	rRNA	0	1	1	1
1119	0	0	N	0	N	0	0	0	0	0	0	0	0	0	0	0	0	0	0	0	0	0	0	0	MT-RNR1	rRNA	0	1	1	1
1120	0	0	N	0	N	0	0	0	0	0	0	0	0	0	0	0	0	0	0	0	0	0	0	0	MT-RNR1	rRNA	0	1	1	1
1121	0	0	N	0	N	0	0	0	0	0	0	0	0	0	0	0	0	0	0	0	0	0	0	0	MT-RNR1	rRNA	0	1	1	1
1122	0	0	N	0	N	0	0	0	0	0	0	0	0	0	0	0	0	0	0	0	0	0	0	0	MT-RNR1	rRNA	0	1	1	1
1123	0	0	N	0	N	0	0	0	0	0	0	0	0	0	0	0	0	0	0	0	0	0	0	0	MT-RNR1	rRNA	0	1	1	1
1124	0	0	N	0	N	0	0	0	0	0	0	0	0	0	0	0	0	0	0	0	0	0	0	0	MT-RNR1	rRNA	0	1	1	1
1125	0	0	N	0	N	0	0	0	0	0	0	0	0	0	0	0	0	0	0	0	0	0	0	0	MT-RNR1	rRNA	0	1	1	1
1126	0	0	N	0	N	0	0	0	0	0	0	0	0	0	0	0	0	0	0	0	0	0	0	0	MT-RNR1	rRNA	0	1	1	1
1127	0	0	N	0	N	0	0	0	0	0	0	0	0	0	0	0	0	0	0	0	0	0	0	0	MT-RNR1	rRNA	0	1	1	1
1128	0	0	N	0	N	0	0	0	0	0	0	0	0	0	0	0	0	0	0	0	0	0	0	0	MT-RNR1	rRNA	0	1	1	1
1129	0	0	N	0	N	0	0	0	0	0	0	0	0	0	0	0	0	0	0	0	0	0	0	0	MT-RNR1	rRNA	0	1	1	1
1130	0	0	N	0	N	0	0	0	0	0	0	0	0	0	0	0	0	0	0	0	0	0	0	0	MT-RNR1	rRNA	0	1	1	1
1131	0	0	N	0	N	0	0	0	0	0	0	0	0	0	0	0	0	0	0	0	0	0	0	0	MT-RNR1	rRNA	0	1	1	1
1132	0	0	N	0	N	0	0	0	0	0	0	0	0	0	0	0	0	0	0	0	0	0	0	0	MT-RNR1	rRNA	0	1	1	1
1133	0	0	N	0	N	0	0	0	0	0	0	0	0	0	0	0	0	0	0	0	0	0	0	0	MT-RNR1	rRNA	0	1	1	1
1134	0	0	N	0	N	0	0	0	0	0	0	0	0	0	0	0	0	0	0	0	0	0	0	0	MT-RNR1	rRNA	0	1	1	1
1135	0	0	N	0	N	0	0	0	0	0	0	0	0	0	0	0	0	0	0	0	0	0	0	0	MT-RNR1	rRNA	0	1	1	1
1136	0	0	N	0	N	0	0	0	0	0	0	0	0	0	0	0	0	0	0	0	0	0	0	0	MT-RNR1	rRNA	0	1	1	1
1137	0	0	N	0	N	0	0	0	0	0	0	0	0	0	0	0	0	0	0	0	0	0	0	0	MT-RNR1	rRNA	0	1	1	1
1138	0	0	N	0	N	0	0	0	0	0	0	0	0	0	0	0	0	0	0	0	0	0	0	0	MT-RNR1	rRNA	0	1	1	1
1139	0	0	N	0	N	0	0	0	0	0	0	0	0	0	0	0	0	0	0	0	0	0	0	0	MT-RNR1	rRNA	0	1	1	1
1140	0	0	N	0	N	0	0	0	0	0	0	0	0	0	0	0	0	0	0	0	0	0	0	0	MT-RNR1	rRNA	0	1	1	1
1141	0	0	N	0	N	0	0	0	0	0	0	0	0	0	0	0	0	0	0	0	0	0	0	0	MT-RNR1	rRNA	0	1	1	1
1142	0	0	N	0	N	0	0	0	0	0	0	0	0	0	0	0	0	0	0	0	0	0	0	0	MT-RNR1	rRNA	0	1	1	1
1143	0	0	N	0	N	0	0	0	0	0	0	0	0	0	0	0	0	0	0	0	0	0	0	0	MT-RNR1	rRNA	0	1	1	1
1144	0	0	N	0	N	0	0	0	0	0	0	0	0	0	0	0	0	0	0	0	0	0	0	0	MT-RNR1	rRNA	0	1	1	1
1145	0	0	N	0	N	0	0	0	0	0	0	0	0	0	0	0	0	0	0	0	0	0	0	0	MT-RNR1	rRNA	0	1	1	1
1146	0	0	N	0	N	0	0	0	0	0	0	0	0	0	0	0	0	0	0	0	0	0	0	0	MT-RNR1	rRNA	0	1	1	1
1147	0	0	N	0	N	0	0	0	0	0	0	0	0	0	0	0	0	0	0	0	0	0	0	0	MT-RNR1	rRNA	0	1	1	1
1148	0	0	N	0	N	0	0	0	0	0	0	0	0	0	0	0	0	0	0	0	0	0	0	0	MT-RNR1	rRNA	0	1	1	1
1149	0	0	N	0	N	0	0	0	0	0	0	0	0	0	0	0	0	0	0	0	0	0	0	0	MT-RNR1	rRNA	0	1	1	1
1150	0	0	N	0	N	0	0	0	0	0	0	0	0	0	0	0	0	0	0	0	0	0	0	0	MT-RNR1	rRNA	0	1	1	1
1151	0	0	N	0	N	0	0	0	0	0	0	0	0	0	0	0	0	0	0	0	0	0	0	0	MT-RNR1	rRNA	0	1	1	1
1152	0	0	N	0	N	0	0	0	0	0	0	0	0	0	0	0	0	0	0	0	0	0	0	0	MT-RNR1	rRNA	0	1	1	1
1153	0	0	N	0	N	0	0	0	0	0	0	0	0	0	0	0	0	0	0	0	0	0	0	0	MT-RNR1	rRNA	0	1	1	1
1154	0	0	N	0	N	0	0	0	0	0	0	0	0	0	0	0	0	0	0	0	0	0	0	0	MT-RNR1	rRNA	0	1	1	1
1155	0	0	N	0	N	0	0	0	0	0	0	0	0	0	0	0	0	0	0	0	0	0	0	0	MT-RNR1	rRNA	0	1	1	1
1156	0	0	N	0	N	0	0	0	0	0	0	0	0	0	0	0	0	0	0	0	0	0	0	0	MT-RNR1	rRNA	0	1	1	1
1157	0	0	N	0	N	0	0	0	0	0	0	0	0	0	0	0	0	0	0	0	0	0	0	0	MT-RNR1	rRNA	0	1	1	1
1158	0	0	N	0	N	0	0	0	0	0	0	0	0	0	0	0	0	0	0	0	0	0	0	0	MT-RNR1	rRNA	0	1	1	1
1159	0	0	N	0	N	0	0	0	0	0	0	0	0	0	0	0	0	0	0	0	0	0	0	0	MT-RNR1	rRNA	0	1	1	1
1160	0	0	N	0	N	0	0	0	0	0	0	0	0	0	0	0	0	0	0	0	0	0	0	0	MT-RNR1	rRNA	0	1	1	1
1161	0	0	N	0	N	0	0	0	0	0	0	0	0	0	0	0	0	0	0	0	0	0	0	0	MT-RNR1	rRNA	0	1	1	1
1162	0	0	N	0	N	0	0	0	0	0	0	0	0	0	0	0	0	0	0	0	0	0	0	0	MT-RNR1	rRNA	0	1	1	1
1163	0	0	N	0	N	0	0	0	0	0	0	0	0	0	0	0	0	0	0	0	0	0	0	0	MT-RNR1	rRNA	0	1	1	1
1164	0	0	N	0	N	0	0	0	0	0	0	0	0	0	0	0	0	0	0	0	0	0	0	0	MT-RNR1	rRNA	0	1	1	1
1165	0	0	N	0	N	0	0	0	0	0	0	0	0	0	0	0	0	0	0	0	0	0	0	0	MT-RNR1	rRNA	0	1	1	1
1166	0	0	N	0	N	0	0	0	0	0	0	0	0	0	0	0	0	0	0	0	0	0	0	0	MT-RNR1	rRNA	0	1	1	1
1167	0	0	N	0	N	0	0	0	0	0	0	0	0	0	0	0	0	0	0	0	0	0	0	0	MT-RNR1	rRNA	0	1	1	1
1168	0	0	N	0	N	0	0	0	0	0	0	0	0	0	0	0	0	0	0	0	0	0	0	0	MT-RNR1	rRNA	0	1	1	1
1169	0	0	N	0	N	0	0	0	0	0	0	0	0	0	0	0	0	0	0	0	0	0	0	0	MT-RNR1	rRNA	0	1	1	1
1170	0	0	N	0	N	0	0	0	0	0	0	0	0	0	0	0	0	0	0	0	0	0	0	0	MT-RNR1	rRNA	0	1	1	1
1171	0	0	N	0	N	0	0	0	0	0	0	0	0	0	0	0	0	0	0	0	0	0	0	0	MT-RNR1	rRNA	0	1	1	1
1172	0	0	N	0	N	0	0	0	0	0	0	0	0	0	0	0	0	0	0	0	0	0	0	0	MT-RNR1	rRNA	0	1	1	1
1173	0	0	N	0	N	0	0	0	0	0	0	0	0	0	0	0	0	0	0	0	0	0	0	0	MT-RNR1	rRNA	0	1	1	1
1174	0	0	N	0	N	0	0	0	0	0	0	0	0	0	0	0	0	0	0	0	0	0	0	0	MT-RNR1	rRNA	0	1	1	1
1175	0	0	N	0	N	0	0	0	0	0	0	0	0	0	0	0	0	0	0	0	0	0	0	0	MT-RNR1	rRNA	0	1	1	1
1176	0	0	N	0	N	0	0	0	0	0	0	0	0	0	0	0	0	0	0	0	0	0	0	0	MT-RNR1	rRNA	0	1	1	1
1177	0	0	N	0	N	0	0	0	0	0	0	0	0	0	0	0	0	0	0	0	0	0	0	0	MT-RNR1	rRNA	0	1	1	1
1178	0	0	N	0	N	0	0	0	0	0	0	0	0	0	0	0	0	0	0	0	0	0	0	0	MT-RNR1	rRNA	0	1	1	1
1179	0	0	N	0	N	0	0	0	0	0	0	0	0	0	0	0	0	0	0	0	0	0	0	0	MT-RNR1	rRNA	0	1	1	1
1180	0	0	N	0	N	0	0	0	0	0	0	0	0	0	0	0	0	0	0	0	0	0	0	0	MT-RNR1	rRNA	0	1	1	1
1181	0	0	N	0	N	0	0	0	0	0	0	0	0	0	0	0	0	0	0	0	0	0	0	0	MT-RNR1	rRNA	0	1	1	1
1182	0	0	N	0	N	0	0	0	0	0	0	0	0	0	0	0	0	0	0	0	0	0	0	0	MT-RNR1	rRNA	0	1	1	1
1183	0	0	N	0	N	0	0	0	0	0	0	0	0	0	0	0	0	0	0	0	0	0	0	0	MT-RNR1	rRNA	0	1	1	1
1184	0	0	N	0	N	0	0	0	0	0	0	0	0	0	0	0	0	0	0	0	0	0	0	0	MT-RNR1	rRNA	0	1	1	1
1185	18	0	C	18	A	0	0	0	0	0	0	0	18	8	10	0	0	0	0	0	0	8	10	0	MT-RNR1	rRNA	0	1	1	1
1186	26	0	A	26	T	0	0	0	0	26	14	12	0	0	0	0	0	0	0	0	0	14	12	0	MT-RNR1	rRNA	0	1	1	1
1187	51	0	T	51	A	0	0	0	0	0	0	0	0	0	0	0	0	0	51	40	11	40	11	0	MT-RNR1	rRNA	0	1	1	1
1188	55	0	A	55	T	0	0	0	0	55	48	7	0	0	0	0	0	0	0	0	0	48	7	0	MT-RNR1	rRNA	0	1	1	1
1189	65	0	T	65	A	0	0	0	0	0	0	0	0	0	0	0	0	0	65	62	3	62	3	0	MT-RNR1	rRNA	0	1	1	1
1190	119	0	C	119	A	0	0	0	0	0	0	0	119	68	51	0	0	0	0	0	0	68	51	0	MT-RNR1	rRNA	0	1	1	1
1191	128	0	C	128	A	0	0	0	0	0	0	0	128	71	57	0	0	0	0	0	0	71	57	0	MT-RNR1	rRNA	0	1	1	1
1192	190	0	C	190	A	0	0	0	0	0	0	0	190	134	56	0	0	0	0	0	0	134	56	0	MT-RNR1	rRNA	0	1	1	1
1193	216	0	T	209	C	7	6	1	3.24	0	0	0	7	6	1	0	0	0	209	165	44	165	44	0	MT-RNR1	rRNA	0	1	1	1
1194	283	0	C	283	A	0	0	0	0	0	0	0	283	230	53	0	0	0	0	0	0	230	53	0	MT-RNR1	rRNA	0	1	1	1
1195	281	0	T	281	A	0	0	0	0	0	0	0	0	0	0	0	0	0	281	241	40	241	40	0	MT-RNR1	rRNA	0	1	1	1
1196	322	0	A	322	T	0	0	0	0	322	266	56	0	0	0	0	0	0	0	0	0	266	56	0	MT-RNR1	rRNA	0	1	1	1
1197	342	0	G	342	A	0	0	0	0	0	0	0	0	0	0	342	273	69	0	0	0	273	69	0	MT-RNR1	rRNA	0	1	1	1
1198	344	0	A	343	G	1	1	0	0.29	343	274	69	0	0	0	1	1	0	0	0	0	274	69	0	MT-RNR1	rRNA	0	1	1	1
1199	420	0	G	420	A	0	0	0	0	0	0	0	0	0	0	420	327	93	0	0	0	327	93	0	MT-RNR1	rRNA	0	1	1	1
1200	437	0	G	437	A	0	0	0	0	0	0	0	0	0	0	437	337	100	0	0	0	337	100	0	MT-RNR1	rRNA	0	1	1	1
1201	481	0	A	481	T	0	0	0	0	481	360	121	0	0	0	0	0	0	0	0	0	360	121	0	MT-RNR1	rRNA	0	1	1	1
1202	592	0	G	592	A	0	0	0	0	0	0	0	0	0	0	592	416	176	0	0	0	416	176	0	MT-RNR1	rRNA	0	1	1	1
1203	652	0	C	651	A	1	1	0	0.15	1	1	0	651	421	230	0	0	0	0	0	0	421	230	0	MT-RNR1	rRNA	0	1	1	1
1204	802	0	C	800	T	1	0	1	0.12	0	0	0	800	467	333	1	0	1	1	0	1	467	333	0	MT-RNR1	rRNA	0	1	1	1
1205	823	0	T	821	A	1	0	1	0.12	1	0	1	1	0	1	0	0	0	821	468	353	468	353	0	MT-RNR1	rRNA	0	1	1	1
1206	958	0	G	955	T	2	1	1	0.21	0	0	0	1	0	1	955	573	382	2	1	1	573	382	0	MT-RNR1	rRNA	0	1	1	1
1207	998	0	T	997	C	1	0	1	0.1	0	0	0	1	0	1	0	0	0	997	580	417	580	417	0	MT-RNR1	rRNA	0	1	1	1
1208	1178	0	T	1178	A	0	0	0	0	0	0	0	0	0	0	0	0	0	1178	580	598	580	598	0	MT-RNR1	rRNA	0	0	1	1
1209	1448	0	C	1445	A	2	1	1	0.14	2	1	1	1445	804	641	0	0	0	1	0	1	804	641	0	MT-RNR1	rRNA	0	0	1	1
1210	1424	0	T	1424	A	0	0	0	0	0	0	0	0	0	0	0	0	0	1424	809	615	809	615	0	MT-RNR1	rRNA	0	0	1	1
1211	1571	0	G	1566	T	3	0	3	0.19	0	0	0	2	1	1	1566	905	661	3	0	3	905	661	0	MT-RNR1	rRNA	0	0	1	1
1212	1541	0	T	1541	A	0	0	0	0	0	0	0	0	0	0	0	0	0	1541	916	625	916	625	0	MT-RNR1	rRNA	0	0	1	1
1213	1870	0	A	1866	T	2	0	2	0.11	1866	984	882	0	0	0	2	1	1	2	0	2	984	882	0	MT-RNR1	rRNA	0	0	1	1
1214	1952	0	A	1949	C	3	0	3	0.15	1949	1015	934	3	0	3	0	0	0	0	0	0	1015	934	0	MT-RNR1	rRNA	0	0	1	1
1215	1944	0	T	1944	A	0	0	0	0	0	0	0	0	0	0	0	0	0	1944	1022	922	1022	922	0	MT-RNR1	rRNA	0	0	1	1
1216	2261	0	C	2260	A	1	0	1	0.04	1	0	1	2260	1174	1086	0	0	0	0	0	0	1174	1086	0	MT-RNR1	rRNA	0	0	1	1
1217	2267	0	G	2266	T	1	1	0	0.04	0	0	0	0	0	0	2266	1211	1055	1	1	0	1211	1055	0	MT-RNR1	rRNA	0	0	1	1
1218	2309	0	A	2309	T	0	0	0	0	2309	1229	1080	0	0	0	0	0	0	0	0	0	1229	1080	0	MT-RNR1	rRNA	0	0	1	1
1219	2201	0	T	2201	A	0	0	0	0	0	0	0	0	0	0	0	0	0	2201	1273	928	1273	928	0	MT-RNR1	rRNA	0	0	1	1
1220	2345	0	A	2345	T	0	0	0	0	2345	1282	1063	0	0	0	0	0	0	0	0	0	1282	1063	0	MT-RNR1	rRNA	0	0	1	1
1221	1588	0	A	1588	T	0	0	0	0	1588	1287	301	0	0	0	0	0	0	0	0	0	1287	301	0	MT-RNR1	rRNA	0	0	1	1
1222	1336	0	A	1325	C	11	1	10	0.82	1325	1290	35	11	1	10	0	0	0	0	0	0	1290	35	2	MT-RNR1	rRNA	1	0	1	1
1223	2635	1	C	2634	A	1	0	1	0.04	1	0	1	2634	1467	1167	0	0	0	0	0	0	1467	1167	6	MT-RNR1	rRNA	1	0	1	1
1224	2697	0	C	2693	A	2	1	1	0.07	2	1	1	2693	1512	1181	1	1	0	1	1	0	1512	1181	5	MT-RNR1	rRNA	1	0	1	1
1225	2710	0	C	2707	A	2	0	2	0.07	2	0	2	2707	1531	1176	0	0	0	1	1	0	1531	1176	4	MT-RNR1	rRNA	1	0	1	1
1226	2675	0	C	2672	T	2	2	0	0.07	1	1	0	2672	1542	1130	0	0	0	2	2	0	1542	1130	3	MT-RNR1	rRNA	1	0	1	1
1227	2709	0	G	2706	T	3	3	0	0.11	0	0	0	0	0	0	2706	1569	1137	3	3	0	1569	1137	1	MT-RNR1	rRNA	1	0	1	1
1228	2568	0	A	2567	G	1	0	1	0.04	2567	1596	971	0	0	0	1	0	1	0	0	0	1596	971	0	MT-RNR1	rRNA	0	0	1	1
1229	2374	0	T	2374	A	0	0	0	0	0	0	0	0	0	0	0	0	0	2374	1603	771	1603	771	0	MT-RNR1	rRNA	0	0	1	1
1230	2791	0	C	2786	A	4	4	0	0.14	4	4	0	2786	1631	1155	1	0	1	0	0	0	1631	1155	0	MT-RNR1	rRNA	0	0	1	1
1231	2703	0	A	2700	G	3	3	0	0.11	2700	1640	1060	0	0	0	3	3	0	0	0	0	1640	1060	0	MT-RNR1	rRNA	0	0	1	1
1232	1955	0	A	1953	C	1	0	1	0.05	1953	1646	307	1	0	1	1	1	0	0	0	0	1646	307	0	MT-RNR1	rRNA	0	0	1	1
1233	2953	0	C	2952	A	1	1	0	0.03	1	1	0	2952	1748	1204	0	0	0	0	0	0	1748	1204	0	MT-RNR1	rRNA	0	0	1	1
1234	3104	0	C	3101	A	2	1	1	0.06	2	1	1	3101	1998	1103	0	0	0	1	1	0	1998	1103	0	MT-RNR1	rRNA	0	0	1	1
1235	2563	0	T	2562	C	1	0	1	0.04	0	0	0	1	0	1	0	0	0	2562	2026	536	2026	536	0	MT-RNR1	rRNA	0	0	1	1
1236	3129	0	C	3124	A	3	2	1	0.1	3	2	1	3124	2097	1027	1	1	0	1	1	0	2097	1027	0	MT-RNR1	rRNA	0	0	1	1
1237	2301	0	A	2295	C	4	2	2	0.17	2295	2151	144	4	2	2	1	1	0	1	0	1	2151	144	0	MT-RNR1	rRNA	0	0	1	1
1238	3483	0	C	3480	A	2	2	0	0.06	2	2	0	3480	2228	1252	1	0	1	0	0	0	2228	1252	0	MT-RNR1	rRNA	0	0	1	1
1239	3362	0	C	3361	A	1	1	0	0.03	1	1	0	3361	2256	1105	0	0	0	0	0	0	2256	1105	0	MT-RNR1	rRNA	0	0	1	1
1240	2381	0	A	2376	C	4	1	3	0.17	2376	2269	107	4	1	3	0	0	0	1	1	0	2269	107	0	MT-RNR1	rRNA	0	0	1	1
1241	3622	0	C	3620	A	1	0	1	0.03	1	0	1	3620	2285	1335	0	0	0	1	0	1	2285	1335	0	MT-RNR1	rRNA	0	0	1	1
1242	3646	0	C	3644	A	2	1	1	0.05	2	1	1	3644	2340	1304	0	0	0	0	0	0	2340	1304	0	MT-RNR1	rRNA	0	0	1	1
1243	3609	0	T	3605	C	4	3	1	0.11	0	0	0	4	3	1	0	0	0	3605	2406	1199	2406	1199	0	MT-RNR1	rRNA	0	0	1	1
1244	3795	0	C	3793	T	2	2	0	0.05	0	0	0	3793	2472	1321	0	0	0	2	2	0	2472	1321	0	MT-RNR1	rRNA	0	0	1	1
1245	3814	0	T	3814	A	0	0	0	0	0	0	0	0	0	0	0	0	0	3814	2474	1340	2474	1340	0	MT-RNR1	rRNA	0	0	1	1
1246	3668	0	T	3667	C	1	1	0	0.03	0	0	0	1	1	0	0	0	0	3667	2472	1195	2472	1195	0	MT-RNR1	rRNA	0	0	1	1
1247	3791	0	G	3788	T	3	3	0	0.08	0	0	0	0	0	0	3788	2483	1305	3	3	0	2483	1305	0	MT-RNR1	rRNA	0	0	1	1
1248	3928	0	C	3925	A	1	0	1	0.03	1	0	1	3925	2529	1396	1	1	0	1	0	1	2529	1396	0	MT-RNR1	rRNA	0	0	1	1
1249	3837	0	T	3836	C	1	0	1	0.03	0	0	0	1	0	1	0	0	0	3836	2538	1298	2538	1298	0	MT-RNR1	rRNA	0	0	1	1
1250	3974	0	C	3969	A	4	2	2	0.1	4	2	2	3969	2536	1433	1	0	1	0	0	0	2536	1433	0	MT-RNR1	rRNA	0	0	1	1
1251	4039	0	A	4039	T	0	0	0	0	4039	2564	1475	0	0	0	0	0	0	0	0	0	2564	1475	0	MT-RNR1	rRNA	0	0	1	1
1252	4095	0	G	4082	T	12	4	8	0.29	1	1	0	0	0	0	4082	2569	1513	12	4	8	2569	1513	0	MT-RNR1	rRNA	0	0	1	1
1253	4169	0	C	4162	T	4	2	2	0.1	3	2	1	4162	2585	1577	0	0	0	4	2	2	2585	1577	0	MT-RNR1	rRNA	0	0	1	1
1254	4253	0	C	4249	T	2	0	2	0.05	1	1	0	4249	2624	1625	1	1	0	2	0	2	2624	1625	8	MT-RNR1	rRNA	1	0	1	1
1255	4269	0	T	4267	C	1	1	0	0.02	0	0	0	1	1	0	1	0	1	4267	2636	1631	2636	1631	9	MT-RNR1	rRNA	1	0	1	1
1256	4336	0	A	4332	G	2	1	1	0.05	4332	2637	1695	1	0	1	2	1	1	1	0	1	2637	1695	10	MT-RNR1	rRNA	1	0	1	1
1257	4360	0	T	4357	A	2	1	1	0.05	2	1	1	0	0	0	1	0	1	4357	2657	1700	2657	1700	11	MT-RNR1	rRNA	1	0	1	1
1258	4369	0	A	4366	T	2	1	1	0.05	4366	2664	1702	1	0	1	0	0	0	2	1	1	2664	1702	12	MT-RNR1	rRNA	1	0	1	1
1259	4323	0	T	4322	C	1	0	1	0.02	0	0	0	1	0	1	0	0	0	4322	2666	1656	2666	1656	13	MT-RNR1	rRNA	1	0	1	1
1260	4246	0	A	4244	T	1	0	1	0.02	4244	2670	1574	1	0	1	0	0	0	1	0	1	2670	1574	14	MT-RNR1	rRNA	1	0	1	1
1261	4655	0	C	4652	T	3	2	1	0.06	0	0	0	4652	2857	1795	0	0	0	3	2	1	2857	1795	7	MT-RNR1	rRNA	1	0	1	1
1262	4765	0	C	4758	A	5	2	3	0.1	5	2	3	4758	2922	1836	0	0	0	2	2	0	2922	1836	0	MT-RNR1	rRNA	0	0	1	1
1263	4958	0	G	4951	T	4	3	1	0.08	1	0	1	2	0	2	4951	3030	1921	4	3	1	3030	1921	0	MT-RNR1	rRNA	0	0	1	1
1264	4971	0	C	4969	A	2	2	0	0.04	2	2	0	4969	3037	1932	0	0	0	0	0	0	3037	1932	0	MT-RNR1	rRNA	0	0	1	1
1265	4986	0	C	4982	A	3	3	0	0.06	3	3	0	4982	3046	1936	0	0	0	1	1	0	3046	1936	0	MT-RNR1	rRNA	0	0	1	1
1266	4987	0	A	4987	T	0	0	0	0	4987	3054	1933	0	0	0	0	0	0	0	0	0	3054	1933	0	MT-RNR1	rRNA	0	0	1	1
1267	4989	0	T	4989	A	0	0	0	0	0	0	0	0	0	0	0	0	0	4989	3058	1931	3058	1931	0	MT-RNR1	rRNA	0	0	1	1
1268	5081	0	C	5081	A	0	0	0	0	0	0	0	5081	3139	1942	0	0	0	0	0	0	3139	1942	0	MT-RNR1	rRNA	0	0	1	1
1269	5090	0	T	5088	C	2	1	1	0.04	0	0	0	2	1	1	0	0	0	5088	3147	1941	3147	1941	0	MT-RNR1	rRNA	0	0	1	1
1270	5093	0	T	5093	A	0	0	0	0	0	0	0	0	0	0	0	0	0	5093	3152	1941	3152	1941	0	MT-RNR1	rRNA	0	0	1	1
1271	5129	0	C	5126	A	2	0	2	0.04	2	0	2	5126	3174	1952	0	0	0	1	1	0	3174	1952	0	MT-RNR1	rRNA	0	0	1	1
1272	5213	0	A	5212	C	1	0	1	0.02	5212	3234	1978	1	0	1	0	0	0	0	0	0	3234	1978	0	MT-RNR1	rRNA	0	0	1	1
1273	5400	0	G	5391	T	5	3	2	0.09	3	3	0	1	0	1	5391	3314	2077	5	3	2	3314	2077	0	MT-RNR1	rRNA	0	0	1	1
1274	5693	0	C	5691	A	1	0	1	0.02	1	0	1	5691	3380	2311	1	0	1	0	0	0	3380	2311	0	MT-RNR1	rRNA	0	0	1	1
1275	5719	0	A	5718	T	1	1	0	0.02	5718	3388	2330	0	0	0	0	0	0	1	1	0	3388	2330	0	MT-RNR1	rRNA	0	0	1	1
1276	5726	0	A	5724	T	1	0	1	0.02	5724	3383	2341	0	0	0	1	1	0	1	0	1	3383	2341	0	MT-RNR1	rRNA	0	0	1	1
1277	5665	0	A	5660	C	2	1	1	0.04	5660	3384	2276	2	1	1	2	1	1	1	0	1	3384	2276	0	MT-RNR1	rRNA	0	0	1	1
1278	5798	0	C	5795	T	2	1	1	0.03	1	0	1	5795	3425	2370	0	0	0	2	1	1	3425	2370	0	MT-RNR1	rRNA	0	0	1	1
1279	5833	0	C	5827	A	3	1	2	0.05	3	1	2	5827	3431	2396	0	0	0	3	2	1	3431	2396	0	MT-RNR1	rRNA	0	0	1	1
1280	5873	0	C	5870	A	3	2	1	0.05	3	2	1	5870	3452	2418	0	0	0	0	0	0	3452	2418	0	MT-RNR1	rRNA	0	0	1	1
1281	6333	0	T	6329	C	2	2	0	0.03	1	0	1	2	2	0	1	1	0	6329	3451	2878	3451	2878	0	MT-RNR1	rRNA	0	0	1	1
1282	6424	0	G	6418	T	4	3	1	0.06	0	0	0	2	2	0	6418	3465	2953	4	3	1	3465	2953	0	MT-RNR1	rRNA	0	0	1	1
1283	6465	0	A	6464	C	1	0	1	0.02	6464	3472	2992	1	0	1	0	0	0	0	0	0	3472	2992	0	MT-RNR1	rRNA	0	0	1	1
1284	6497	0	T	6495	C	2	0	2	0.03	0	0	0	2	0	2	0	0	0	6495	3475	3020	3475	3020	0	MT-RNR1	rRNA	0	0	1	1
1285	6526	1	G	6522	T	3	1	2	0.05	0	0	0	1	0	1	6522	3511	3011	3	1	2	3511	3011	0	MT-RNR1	rRNA	0	0	1	1
1286	6592	0	A	6591	T	1	1	0	0.02	6591	3525	3066	0	0	0	0	0	0	1	1	0	3525	3066	0	MT-RNR1	rRNA	0	0	1	1
1287	6577	0	A	6574	T	2	1	1	0.03	6574	3501	3073	0	0	0	1	1	0	2	1	1	3501	3073	0	MT-RNR1	rRNA	0	0	1	1
1288	6567	0	G	6564	T	2	1	1	0.03	0	0	0	1	1	0	6564	3490	3074	2	1	1	3490	3074	0	MT-RNR1	rRNA	0	0	1	1
1289	6696	1	G	6687	T	5	2	3	0.07	2	2	0	2	0	2	6687	3481	3206	5	2	3	3481	3206	0	MT-RNR1	rRNA	0	0	1	1
1290	6679	0	C	6669	A	6	6	0	0.09	6	6	0	6669	3408	3261	2	2	0	2	1	1	3408	3261	0	MT-RNR1	rRNA	0	0	1	1
1291	6937	0	T	6930	A	3	2	1	0.04	3	2	1	3	2	1	1	0	1	6930	3681	3249	3681	3249	0	MT-RNR1	rRNA	0	0	1	1
1292	6938	0	A	6935	C	2	1	1	0.03	6935	3654	3281	2	1	1	0	0	0	1	1	0	3654	3281	0	MT-RNR1	rRNA	0	0	1	1
1293	6992	0	C	6986	G	4	3	1	0.06	1	0	1	6986	3664	3322	4	3	1	1	0	1	3664	3322	0	MT-RNR1	rRNA	0	0	1	1
1294	7015	0	A	7010	G	4	2	2	0.06	7010	3613	3397	0	0	0	4	2	2	1	0	1	3613	3397	0	MT-RNR1	rRNA	0	0	1	1
1295	7040	0	A	7038	T	1	1	0	0.01	7038	3618	3420	1	0	1	0	0	0	1	1	0	3618	3420	0	MT-RNR1	rRNA	0	0	1	1
1296	7079	0	A	7074	G	4	1	3	0.06	7074	3606	3468	0	0	0	4	1	3	1	0	1	3606	3468	0	MT-RNR1	rRNA	0	0	1	1
1297	7186	0	G	7180	C	3	2	1	0.04	1	0	1	3	2	1	7180	3669	3511	2	2	0	3669	3511	0	MT-RNR1	rRNA	0	0	1	1
1298	7052	0	T	7050	C	2	0	2	0.03	0	0	0	2	0	2	0	0	0	7050	3579	3471	3579	3471	0	MT-RNR1	rRNA	0	0	1	1
1299	7101	0	A	7100	C	1	0	1	0.01	7100	3609	3491	1	0	1	0	0	0	0	0	0	3609	3491	0	MT-RNR1	rRNA	0	0	1	1
1300	7113	0	A	7111	T	1	0	1	0.01	7111	3644	3467	0	0	0	1	0	1	1	0	1	3644	3467	0	MT-RNR1	rRNA	0	0	1	1
1301	7093	0	G	7092	T	1	0	1	0.01	0	0	0	0	0	0	7092	3645	3447	1	0	1	3645	3447	0	MT-RNR1	rRNA	0	0	1	1
1302	6997	0	C	6986	A	10	4	6	0.14	10	4	6	6986	3626	3360	0	0	0	1	1	0	3626	3360	0	MT-RNR1	rRNA	0	0	1	1
1303	6960	0	G	6956	A	2	2	0	0.03	2	2	0	0	0	0	6956	3611	3345	2	0	2	3611	3345	0	MT-RNR1	rRNA	0	0	1	1
1304	6877	0	C	6869	A	7	6	1	0.1	7	6	1	6869	3668	3201	1	0	1	0	0	0	3668	3201	0	MT-RNR1	rRNA	0	0	1	1
1305	6859	0	A	6831	G	26	5	21	0.38	6831	3664	3167	0	0	0	26	5	21	2	1	1	3664	3167	0	MT-RNR1	rRNA	0	0	1	0
1306	6744	0	A	6742	T	2	0	2	0.03	6742	3571	3171	0	0	0	0	0	0	2	0	2	3571	3171	0	MT-RNR1	rRNA	0	0	1	1
1307	6724	0	G	6720	T	4	4	0	0.06	0	0	0	0	0	0	6720	3555	3165	4	4	0	3555	3165	0	MT-RNR1	rRNA	0	0	1	1
1308	6343	0	T	6334	A	7	6	1	0.11	7	6	1	1	1	0	1	0	1	6334	3449	2885	3449	2885	0	MT-RNR1	rRNA	0	0	1	1
1309	6080	0	A	6078	T	2	2	0	0.03	6078	3320	2758	0	0	0	0	0	0	2	2	0	3320	2758	0	MT-RNR1	rRNA	0	0	1	1
1310	6307	0	C	6305	A	1	1	0	0.02	1	1	0	6305	3361	2944	0	0	0	1	1	0	3361	2944	0	MT-RNR1	rRNA	0	0	1	1
1311	6241	0	C	6235	A	2	1	1	0.03	2	1	1	6235	3277	2958	2	1	1	2	1	1	3277	2958	0	MT-RNR1	rRNA	0	0	1	1
1312	6213	0	C	6199	A	9	3	6	0.14	9	3	6	6199	3302	2897	1	1	0	4	3	1	3302	2897	0	MT-RNR1	rRNA	0	0	1	1
1313	6016	0	A	6000	G	14	0	14	0.23	6000	3247	2753	1	0	1	14	0	14	1	0	1	3247	2753	0	MT-RNR1	rRNA	0	0	1	1
1314	5927	0	C	5914	G	7	3	4	0.12	3	1	2	5914	3245	2669	7	3	4	3	1	2	3245	2669	0	MT-RNR1	rRNA	0	0	1	1
1315	5845	0	G	5831	A	10	10	0	0.17	10	10	0	1	0	1	5831	3243	2588	3	2	1	3243	2588	0	MT-RNR1	rRNA	0	0	1	1
1316	5695	0	T	5685	A	5	1	4	0.09	5	1	4	0	0	0	5	1	4	5685	3111	2574	3111	2574	0	MT-RNR1	rRNA	0	0	1	1
1317	5782	0	A	5776	C	3	3	0	0.05	5776	3190	2586	3	3	0	3	1	2	0	0	0	3190	2586	0	MT-RNR1	rRNA	0	0	1	1
1318	5810	0	A	5808	G	2	2	0	0.03	5808	3209	2599	0	0	0	2	2	0	0	0	0	3209	2599	0	MT-RNR1	rRNA	0	0	1	1
1319	5816	0	A	5815	G	1	1	0	0.02	5815	3183	2632	0	0	0	1	1	0	0	0	0	3183	2632	0	MT-RNR1	rRNA	0	0	1	1
1320	5839	6	G	5835	T	4	1	3	0.07	0	0	0	0	0	0	5835	3199	2636	4	1	3	3199	2636	0	MT-RNR1	rRNA	0	0	1	1
1321	5810	0	A	5809	C	1	0	1	0.02	5809	3183	2626	1	0	1	0	0	0	0	0	0	3183	2626	0	MT-RNR1	rRNA	0	0	1	1
1322	5911	0	C	5906	G	4	3	1	0.07	0	0	0	5906	3234	2672	4	3	1	1	0	1	3234	2672	0	MT-RNR1	rRNA	0	0	1	1
1323	6086	0	G	6082	T	3	2	1	0.05	1	1	0	0	0	0	6082	3170	2912	3	2	1	3170	2912	0	MT-RNR1	rRNA	0	0	1	1
1324	6099	0	T	6089	C	5	1	4	0.08	2	0	2	5	1	4	3	0	3	6089	3098	2991	3098	2991	0	MT-RNR1	rRNA	0	0	1	1
1325	6180	0	T	6175	C	3	0	3	0.05	0	0	0	3	0	3	2	0	2	6175	3107	3068	3107	3068	0	MT-RNR1	rRNA	0	0	1	1
1326	6190	0	A	6187	G	2	1	1	0.03	6187	3100	3087	1	0	1	2	1	1	0	0	0	3100	3087	0	MT-RNR1	rRNA	0	0	1	1
1327	6175	0	G	6165	T	5	1	4	0.08	3	2	1	2	0	2	6165	3080	3085	5	1	4	3080	3085	0	MT-RNR1	rRNA	0	0	1	1
1328	6212	0	G	6207	C	3	1	2	0.05	0	0	0	3	1	2	6207	3121	3086	2	1	1	3121	3086	0	MT-RNR1	rRNA	0	0	1	1
1329	6180	0	T	6171	C	4	3	1	0.06	3	3	0	4	3	1	2	0	2	6171	3055	3116	3055	3116	0	MT-RNR1	rRNA	0	0	1	1
1330	6540	0	C	6537	A	1	0	1	0.02	1	0	1	6537	3156	3381	1	0	1	1	0	1	3156	3381	0	MT-RNR1	rRNA	0	0	1	1
1331	6556	0	A	6555	G	1	0	1	0.02	6555	3161	3394	0	0	0	1	0	1	0	0	0	3161	3394	0	MT-RNR1	rRNA	0	0	1	1
1332	6589	0	A	6587	G	2	0	2	0.03	6587	3170	3417	0	0	0	2	0	2	0	0	0	3170	3417	0	MT-RNR1	rRNA	0	0	1	1
1333	6510	0	G	6507	T	2	2	0	0.03	1	0	1	0	0	0	6507	3077	3430	2	2	0	3077	3430	0	MT-RNR1	rRNA	0	0	1	1
1334	6246	0	G	6239	A	5	3	2	0.08	5	3	2	1	1	0	6239	2840	3399	1	0	1	2840	3399	0	MT-RNR1	rRNA	0	0	1	1
1335	5985	0	T	5979	G	4	3	1	0.07	1	1	0	1	1	0	4	3	1	5979	2612	3367	2612	3367	0	MT-RNR1	rRNA	0	0	1	1
1336	6143	0	G	6141	A	1	1	0	0.02	1	1	0	0	0	0	6141	2748	3393	1	0	1	2748	3393	0	MT-RNR1	rRNA	0	0	1	1
1337	6070	0	T	6064	C	5	3	2	0.08	0	0	0	5	3	2	1	0	1	6064	2648	3416	2648	3416	0	MT-RNR1	rRNA	0	0	1	1
1338	6077	0	A	6077	T	0	0	0	0	6077	2652	3425	0	0	0	0	0	0	0	0	0	2652	3425	0	MT-RNR1	rRNA	0	0	1	1
1339	6088	0	G	6080	A	5	3	2	0.08	5	3	2	1	1	0	6080	2648	3432	2	0	2	2648	3432	0	MT-RNR1	rRNA	0	0	1	1
1340	6078	0	C	6073	A	3	2	1	0.05	3	2	1	6073	2646	3427	1	1	0	1	1	0	2646	3427	0	MT-RNR1	rRNA	0	0	1	1
1341	6143	0	C	6139	A	2	2	0	0.03	2	2	0	6139	2676	3463	1	1	0	1	0	1	2676	3463	0	MT-RNR1	rRNA	0	0	1	1
1342	6184	0	C	6177	T	4	3	1	0.06	3	3	0	6177	2653	3524	0	0	0	4	3	1	2653	3524	0	MT-RNR1	rRNA	0	0	1	1
1343	6193	0	A	6191	G	2	0	2	0.03	6191	2607	3584	0	0	0	2	0	2	0	0	0	2607	3584	0	MT-RNR1	rRNA	0	0	1	1
1344	6134	0	T	6130	G	3	0	3	0.05	1	0	1	0	0	0	3	0	3	6130	2552	3578	2552	3578	0	MT-RNR1	rRNA	0	0	1	1
1345	6145	0	G	6139	T	6	4	2	0.1	0	0	0	0	0	0	6139	2562	3577	6	4	2	2562	3577	0	MT-RNR1	rRNA	0	0	1	1
1346	6166	0	A	6162	T	2	0	2	0.03	6162	2559	3603	0	0	0	2	0	2	2	0	2	2559	3603	0	MT-RNR1	rRNA	0	0	1	1
1347	6199	0	G	6187	T	11	4	7	0.18	0	0	0	1	1	0	6187	2552	3635	11	4	7	2552	3635	0	MT-RNR1	rRNA	0	0	1	1
1348	6196	0	G	6187	T	9	4	5	0.15	0	0	0	0	0	0	6187	2521	3666	9	4	5	2521	3666	0	MT-RNR1	rRNA	0	0	1	1
1349	6021	0	T	6006	C	9	0	9	0.15	3	0	3	9	0	9	3	0	3	6006	2355	3651	2355	3651	0	MT-RNR1	rRNA	0	0	1	1
1350	6165	2	G	6155	T	5	2	3	0.08	4	0	4	1	0	1	6155	2502	3653	5	2	3	2502	3653	0	MT-RNR1	rRNA	0	0	1	1
1351	6155	0	G	6147	T	6	2	4	0.1	1	0	1	1	0	1	6147	2512	3635	6	2	4	2512	3635	0	MT-RNR1	rRNA	0	0	1	1
1352	6244	0	C	6236	A	6	2	4	0.1	6	2	4	6236	2632	3604	0	0	0	2	1	1	2632	3604	0	MT-RNR1	rRNA	0	0	1	1
1353	6182	0	A	6152	G	27	0	27	0.44	6152	2626	3526	1	0	1	27	0	27	2	0	2	2626	3526	0	MT-RNR1	rRNA	0	0	1	1
1354	6108	0	A	6101	G	6	1	5	0.1	6101	2599	3502	1	0	1	6	1	5	0	0	0	2599	3502	0	MT-RNR1	rRNA	0	0	1	1
1355	6172	0	G	6171	A	1	1	0	0.02	1	1	0	0	0	0	6171	2668	3503	0	0	0	2668	3503	0	MT-RNR1	rRNA	0	0	1	1
1356	6141	0	A	6138	G	3	1	2	0.05	6138	2710	3428	0	0	0	3	1	2	0	0	0	2710	3428	0	MT-RNR1	rRNA	0	0	1	1
1357	6135	0	A	6133	T	1	1	0	0.02	6133	2706	3427	0	0	0	1	1	0	1	1	0	2706	3427	0	MT-RNR1	rRNA	0	0	1	1
1358	6224	0	A	6221	G	2	2	0	0.03	6221	2783	3438	1	1	0	2	2	0	0	0	0	2783	3438	0	MT-RNR1	rRNA	0	0	1	1
1359	6195	0	T	6189	C	3	1	2	0.05	1	1	0	3	1	2	2	1	1	6189	2780	3409	2780	3409	0	MT-RNR1	rRNA	0	0	1	1
1360	6232	0	G	6218	T	13	4	9	0.21	1	1	0	0	0	0	6218	2835	3383	13	4	9	2835	3383	0	MT-RNR1	rRNA	0	0	1	1
1361	6178	0	G	6166	T	10	1	9	0.16	0	0	0	2	1	1	6166	2655	3511	10	1	9	2655	3511	0	MT-RNR1	rRNA	0	0	1	1
1362	6103	0	G	6096	C	4	1	3	0.07	1	0	1	4	1	3	6096	2605	3491	2	2	0	2605	3491	0	MT-RNR1	rRNA	0	0	1	1
1363	5956	0	C	5950	T	4	2	2	0.07	2	1	1	5950	2519	3431	0	0	0	4	2	2	2519	3431	0	MT-RNR1	rRNA	0	0	1	1
1364	5981	0	T	5977	C	2	2	0	0.03	1	0	1	2	2	0	1	0	1	5977	2512	3465	2512	3465	0	MT-RNR1	rRNA	0	0	1	1
1365	6168	0	A	6166	T	1	1	0	0.02	6166	2538	3628	1	0	1	0	0	0	1	1	0	2538	3628	0	MT-RNR1	rRNA	0	0	1	1
1366	6366	0	C	6365	T	1	0	1	0.02	0	0	0	6365	2514	3851	0	0	0	1	0	1	2514	3851	0	MT-RNR1	rRNA	0	0	1	1
1367	6416	0	A	6413	G	2	0	2	0.03	6413	2568	3845	0	0	0	2	0	2	1	0	1	2568	3845	2	MT-RNR1	rRNA	1	0	1	1
1368	6375	2	T	6373	A	2	0	2	0.03	2	0	2	0	0	0	0	0	0	6373	2498	3875	2498	3875	6	MT-RNR1	rRNA	1	0	1	1
1369	6407	0	T	6404	C	2	0	2	0.03	1	0	1	2	0	2	0	0	0	6404	2524	3880	2524	3880	5	MT-RNR1	rRNA	1	0	1	1
1370	6444	0	T	6441	C	3	1	2	0.05	0	0	0	3	1	2	0	0	0	6441	2539	3902	2539	3902	4	MT-RNR1	rRNA	1	0	1	1
1371	6414	0	T	6413	A	1	1	0	0.02	1	1	0	0	0	0	0	0	0	6413	2517	3896	2517	3896	3	MT-RNR1	rRNA	1	0	1	1
1372	6357	0	C	6355	A	2	1	1	0.03	2	1	1	6355	2470	3885	0	0	0	0	0	0	2470	3885	1	MT-RNR1	rRNA	1	0	1	1
1373	6187	0	T	6187	A	0	0	0	0	0	0	0	0	0	0	0	0	0	6187	2374	3813	2374	3813	0	MT-RNR1	rRNA	0	0	1	1
1374	5839	0	A	5838	C	1	1	0	0.02	5838	2321	3517	1	1	0	0	0	0	0	0	0	2321	3517	2	MT-RNR1	rRNA	1	0	1	1
1375	5899	3	C	5894	A	4	0	4	0.07	4	0	4	5894	2303	3591	0	0	0	1	0	1	2303	3591	6	MT-RNR1	rRNA	1	0	1	1
1376	5904	0	C	5899	A	4	2	2	0.07	4	2	2	5899	2295	3604	0	0	0	1	0	1	2295	3604	5	MT-RNR1	rRNA	1	0	1	1
1377	6159	0	C	6150	A	5	4	1	0.08	5	4	1	6150	2294	3856	0	0	0	4	2	2	2294	3856	4	MT-RNR1	rRNA	1	0	1	1
1378	6230	0	C	6222	A	5	1	4	0.08	5	1	4	6222	2305	3917	0	0	0	3	0	3	2305	3917	3	MT-RNR1	rRNA	1	0	1	1
1379	6213	0	A	6194	G	14	0	14	0.23	6194	2292	3902	1	0	1	14	0	14	4	2	2	2292	3902	1	MT-RNR1	rRNA	1	0	1	1
1380	6238	0	G	6236	A	1	0	1	0.02	1	0	1	1	1	0	6236	2298	3938	0	0	0	2298	3938	2	MT-RNR1	rRNA	1	0	1	1
1381	5749	1	A	5730	G	19	0	19	0.33	5730	2296	3434	0	0	0	19	0	19	0	0	0	2296	3434	6	MT-RNR1	rRNA	1	0	1	1
1382	5718	1	A	5709	G	8	3	5	0.14	5709	2288	3421	0	0	0	8	3	5	1	0	1	2288	3421	5	MT-RNR1	rRNA	1	0	1	1
1383	5657	0	A	5651	G	5	3	2	0.09	5651	2273	3378	1	0	1	5	3	2	0	0	0	2273	3378	4	MT-RNR1	rRNA	1	0	1	1
1384	5608	0	A	5602	T	4	3	1	0.07	5602	2271	3331	0	0	0	2	0	2	4	3	1	2271	3331	3	MT-RNR1	rRNA	1	0	1	1
1385	5788	0	C	5783	A	2	1	1	0.03	2	1	1	5783	2353	3430	1	1	0	2	1	1	2353	3430	1	MT-RNR1	rRNA	1	0	1	1
1386	5746	0	T	5742	A	2	2	0	0.03	2	2	0	1	1	0	1	1	0	5742	2352	3390	2352	3390	0	MT-RNR1	rRNA	0	0	1	1
1387	5818	0	A	5814	T	2	1	1	0.03	5814	2334	3480	0	0	0	2	2	0	2	1	1	2334	3480	0	MT-RNR1	rRNA	0	0	1	1
1388	5881	0	C	5878	A	2	2	0	0.03	2	2	0	5878	2343	3535	0	0	0	1	0	1	2343	3535	0	MT-RNR1	rRNA	0	0	1	1
1389	5775	0	G	5767	A	4	1	3	0.07	4	1	3	1	0	1	5767	2353	3414	3	1	2	2353	3414	0	MT-RNR1	rRNA	0	0	1	1
1390	5837	0	A	5830	G	6	2	4	0.1	5830	2242	3588	0	0	0	6	2	4	1	1	0	2242	3588	0	MT-RNR1	rRNA	0	0	1	1
1391	5739	0	T	5719	A	8	1	7	0.14	8	1	7	8	0	8	4	0	4	5719	2150	3569	2150	3569	0	MT-RNR1	rRNA	0	0	1	1
1392	5699	0	A	5694	T	2	1	1	0.04	5694	2136	3558	2	0	2	1	0	1	2	1	1	2136	3558	0	MT-RNR1	rRNA	0	0	1	1
1393	5679	0	G	5674	T	3	1	2	0.05	2	0	2	0	0	0	5674	2092	3582	3	1	2	2092	3582	0	MT-RNR1	rRNA	0	0	1	1
1394	5664	0	C	5659	A	5	2	3	0.09	5	2	3	5659	2090	3569	0	0	0	0	0	0	2090	3569	0	MT-RNR1	rRNA	0	0	1	1
1395	5664	0	C	5658	G	3	0	3	0.05	2	0	2	5658	2120	3538	3	0	3	1	1	0	2120	3538	0	MT-RNR1	rRNA	0	0	1	1
1396	5640	0	C	5631	A	5	2	3	0.09	5	2	3	5631	2123	3508	2	0	2	2	1	1	2123	3508	0	MT-RNR1	rRNA	0	0	1	1
1397	5527	0	T	5517	G	6	0	6	0.11	3	0	3	1	0	1	6	0	6	5517	2051	3466	2051	3466	0	MT-RNR1	rRNA	0	0	1	1
1398	5536	0	T	5535	G	1	0	1	0.02	0	0	0	0	0	0	1	0	1	5535	2048	3487	2048	3487	0	MT-RNR1	rRNA	0	0	1	1
1399	5594	0	A	5594	T	0	0	0	0	5594	2101	3493	0	0	0	0	0	0	0	0	0	2101	3493	0	MT-RNR1	rRNA	0	0	1	1
1400	5618	0	T	5616	A	1	0	1	0.02	1	0	1	0	0	0	1	0	1	5616	2113	3503	2113	3503	0	MT-RNR1	rRNA	0	0	1	1
1401	5633	0	G	5631	T	1	0	1	0.02	0	0	0	1	0	1	5631	2118	3513	1	0	1	2118	3513	0	MT-RNR1	rRNA	0	0	1	1
1402	5580	0	A	5578	T	2	0	2	0.04	5578	2060	3518	0	0	0	0	0	0	2	0	2	2060	3518	0	MT-RNR1	rRNA	0	0	1	1
1403	5590	0	A	5590	T	0	0	0	0	5590	2067	3523	0	0	0	0	0	0	0	0	0	2067	3523	0	MT-RNR1	rRNA	0	0	1	1
1404	5510	0	A	5509	G	1	0	1	0.02	5509	1996	3513	0	0	0	1	0	1	0	0	0	1996	3513	0	MT-RNR1	rRNA	0	0	1	1
1405	5608	0	C	5602	A	3	2	1	0.05	3	2	1	5602	2046	3556	1	0	1	2	0	2	2046	3556	0	MT-RNR1	rRNA	0	0	1	1
1406	5580	0	T	5580	A	0	0	0	0	0	0	0	0	0	0	0	0	0	5580	2053	3527	2053	3527	0	MT-RNR1	rRNA	0	0	1	1
1407	5588	0	T	5587	A	1	1	0	0.02	1	1	0	0	0	0	0	0	0	5587	2047	3540	2047	3540	0	MT-RNR1	rRNA	0	0	1	1
1408	5589	0	A	5588	G	1	0	1	0.02	5588	2044	3544	0	0	0	1	0	1	0	0	0	2044	3544	0	MT-RNR1	rRNA	0	0	1	1
1409	5581	0	A	5579	G	2	1	1	0.04	5579	2037	3542	0	0	0	2	1	1	0	0	0	2037	3542	0	MT-RNR1	rRNA	0	0	1	1
1410	5539	0	G	5535	A	4	1	3	0.07	4	1	3	0	0	0	5535	2016	3519	0	0	0	2016	3519	0	MT-RNR1	rRNA	0	0	1	1
1411	5478	0	G	5478	A	0	0	0	0	0	0	0	0	0	0	5478	2010	3468	0	0	0	2010	3468	0	MT-RNR1	rRNA	0	0	1	1
1412	5439	0	G	5437	T	2	1	1	0.04	0	0	0	0	0	0	5437	1967	3470	2	1	1	1967	3470	0	MT-RNR1	rRNA	0	0	1	1
1413	5298	0	T	5296	C	2	1	1	0.04	0	0	0	2	1	1	0	0	0	5296	1840	3456	1840	3456	0	MT-RNR1	rRNA	0	0	1	1
1414	5398	0	C	5390	A	5	1	4	0.09	5	1	4	5390	1929	3461	0	0	0	3	2	1	1929	3461	0	MT-RNR1	rRNA	0	0	1	1
1415	5381	0	G	5378	A	2	1	1	0.04	2	1	1	0	0	0	5378	1912	3466	1	0	1	1912	3466	0	MT-RNR1	rRNA	0	0	1	1
1416	5274	0	A	5270	G	3	1	2	0.06	5270	1823	3447	0	0	0	3	1	2	1	1	0	1823	3447	0	MT-RNR1	rRNA	0	0	1	1
1417	5209	0	A	5207	C	2	2	0	0.04	5207	1765	3442	2	2	0	0	0	0	0	0	0	1765	3442	0	MT-RNR1	rRNA	0	0	1	1
1418	5174	0	G	5168	T	5	3	2	0.1	0	0	0	1	1	0	5168	1742	3426	5	3	2	1742	3426	0	MT-RNR1	rRNA	0	0	1	1
1419	5116	0	G	5113	A	2	0	2	0.04	2	0	2	0	0	0	5113	1725	3388	1	0	1	1725	3388	0	MT-RNR1	rRNA	0	0	1	1
1420	4698	0	T	4683	C	13	1	12	0.28	1	0	1	13	1	12	1	0	1	4683	1320	3363	1320	3363	0	MT-RNR1	rRNA	0	0	1	1
1421	5069	0	G	5064	A	3	1	2	0.06	3	1	2	0	0	0	5064	1693	3371	2	1	1	1693	3371	0	MT-RNR1	rRNA	0	0	1	1
1422	5009	0	G	4999	A	8	3	5	0.16	8	3	5	0	0	0	4999	1663	3336	2	2	0	1663	3336	0	MT-RNR1	rRNA	0	0	1	1
1423	4616	0	A	4574	G	26	1	25	0.56	4574	1546	3028	7	0	7	26	1	25	9	0	9	1546	3028	0	MT-RNR1	rRNA	0	0	1	1
1424	4514	0	T	4476	G	18	2	16	0.4	12	0	12	8	0	8	18	2	16	4476	1543	2933	1543	2933	0	MT-RNR1	rRNA	0	0	1	1
1425	4436	0	T	4431	A	4	2	2	0.09	4	2	2	0	0	0	1	0	1	4431	1552	2879	1552	2879	0	MT-RNR1	rRNA	0	0	1	1
1426	4426	0	T	4424	G	2	2	0	0.05	0	0	0	0	0	0	2	2	0	4424	1556	2868	1556	2868	0	MT-RNR1	rRNA	0	0	1	1
1427	4417	0	A	4416	C	1	1	0	0.02	4416	1549	2867	1	1	0	0	0	0	0	0	0	1549	2867	0	MT-RNR1	rRNA	0	0	1	1
1428	4352	0	G	4347	T	4	3	1	0.09	0	0	0	1	1	0	4347	1483	2864	4	3	1	1483	2864	0	MT-RNR1	rRNA	0	0	1	1
1429	4274	0	C	4269	A	4	1	3	0.09	4	1	3	4269	1446	2823	0	0	0	1	0	1	1446	2823	0	MT-RNR1	rRNA	0	0	1	1
1430	3964	0	A	3963	G	1	0	1	0.03	3963	1396	2567	0	0	0	1	0	1	0	0	0	1396	2567	0	MT-RNR1	rRNA	0	0	1	1
1431	3960	0	G	3958	A	1	0	1	0.03	1	0	1	0	0	0	3958	1397	2561	1	0	1	1397	2561	0	MT-RNR1	rRNA	0	0	1	1
1432	3906	0	T	3902	A	4	1	3	0.1	4	1	3	0	0	0	0	0	0	3902	1373	2529	1373	2529	0	MT-RNR1	rRNA	0	0	1	1
1433	3912	0	A	3908	G	3	0	3	0.08	3908	1381	2527	0	0	0	3	0	3	1	1	0	1381	2527	0	MT-RNR1	rRNA	0	0	1	1
1434	3884	0	A	3883	T	1	0	1	0.03	3883	1364	2519	0	0	0	0	0	0	1	0	1	1364	2519	0	MT-RNR1	rRNA	0	0	1	1
1435	3871	0	A	3870	C	1	0	1	0.03	3870	1359	2511	1	0	1	0	0	0	0	0	0	1359	2511	0	MT-RNR1	rRNA	0	0	1	1
1436	3836	0	C	3832	A	3	1	2	0.08	3	1	2	3832	1317	2515	0	0	0	1	0	1	1317	2515	0	MT-RNR1	rRNA	0	0	1	1
1437	3836	0	T	3834	A	1	0	1	0.03	1	0	1	0	0	0	1	1	0	3834	1337	2497	1337	2497	0	MT-RNR1	rRNA	0	0	1	1
1438	3834	0	G	3829	T	4	1	3	0.1	1	1	0	0	0	0	3829	1325	2504	4	1	3	1325	2504	0	MT-RNR1	rRNA	0	0	1	1
1439	3812	0	A	3808	G	3	0	3	0.08	3808	1317	2491	0	0	0	3	0	3	1	1	0	1317	2491	0	MT-RNR1	rRNA	0	0	1	1
1440	3794	0	G	3791	T	2	1	1	0.05	0	0	0	1	1	0	3791	1306	2485	2	1	1	1306	2485	0	MT-RNR1	rRNA	0	0	1	1
1441	3663	0	A	3657	G	6	0	6	0.16	3657	1269	2388	0	0	0	6	0	6	0	0	0	1269	2388	0	MT-RNR1	rRNA	0	0	1	1
1442	3605	0	G	3603	T	2	2	0	0.06	0	0	0	0	0	0	3603	1263	2340	2	2	0	1263	2340	0	MT-RNR1	rRNA	0	0	1	1
1443	3419	0	T	3412	A	4	1	3	0.12	4	1	3	1	0	1	2	1	1	3412	1136	2276	1136	2276	0	MT-RNR1	rRNA	0	0	1	1
1444	3522	0	A	3518	C	2	0	2	0.06	3518	1236	2282	2	0	2	2	1	1	0	0	0	1236	2282	0	MT-RNR1	rRNA	0	0	1	1
1445	3539	0	G	3539	A	0	0	0	0	0	0	0	0	0	0	3539	1231	2308	0	0	0	1231	2308	0	MT-RNR1	rRNA	0	0	1	1
1446	3509	2	A	3508	G	1	0	1	0.03	3508	1226	2282	0	0	0	1	0	1	0	0	0	1226	2282	0	MT-RNR1	rRNA	0	0	1	1
1447	3511	0	G	3508	T	2	1	1	0.06	1	1	0	0	0	0	3508	1242	2266	2	1	1	1242	2266	0	MT-RNR1	rRNA	0	0	1	1
1448	3253	0	T	3247	A	4	1	3	0.12	4	1	3	2	1	1	0	0	0	3247	1055	2192	1055	2192	0	MT-RNR1	rRNA	0	0	1	1
1449	3458	0	G	3455	T	3	1	2	0.09	0	0	0	0	0	0	3455	1255	2200	3	1	2	1255	2200	0	MT-RNR1	rRNA	0	0	1	1
1450	3572	0	C	3567	A	3	1	2	0.08	3	1	2	3567	1359	2208	1	0	1	1	1	0	1359	2208	0	MT-RNR1	rRNA	0	0	1	1
1451	3568	0	T	3566	A	1	0	1	0.03	1	0	1	0	0	0	1	0	1	3566	1341	2225	1341	2225	0	MT-RNR1	rRNA	0	0	1	1
1452	3448	0	T	3448	A	0	0	0	0	0	0	0	0	0	0	0	0	0	3448	1223	2225	1223	2225	0	MT-RNR1	rRNA	0	0	1	1
1453	3429	0	A	3429	T	0	0	0	0	3429	1206	2223	0	0	0	0	0	0	0	0	0	1206	2223	0	MT-RNR1	rRNA	0	0	1	1
1454	3421	0	G	3421	A	0	0	0	0	0	0	0	0	0	0	3421	1206	2215	0	0	0	1206	2215	0	MT-RNR1	rRNA	0	0	1	1
1455	3343	0	T	3342	C	1	0	1	0.03	0	0	0	1	0	1	0	0	0	3342	1120	2222	1120	2222	0	MT-RNR1	rRNA	0	0	1	1
1456	3281	0	T	3277	C	4	1	3	0.12	0	0	0	4	1	3	0	0	0	3277	1066	2211	1066	2211	0	MT-RNR1	rRNA	0	0	1	1
1457	3290	0	G	3289	T	1	0	1	0.03	0	0	0	0	0	0	3289	1070	2219	1	0	1	1070	2219	0	MT-RNR1	rRNA	0	0	1	1
1458	3206	0	A	3205	G	1	0	1	0.03	3205	989	2216	0	0	0	1	0	1	0	0	0	989	2216	0	MT-RNR1	rRNA	0	0	1	1
1459	3176	2	A	3173	T	2	0	2	0.06	3173	971	2202	0	0	0	1	1	0	2	0	2	971	2202	0	MT-RNR1	rRNA	0	0	1	1
1460	3182	0	C	3177	A	4	3	1	0.13	4	3	1	3177	935	2242	0	0	0	1	0	1	935	2242	0	MT-RNR1	rRNA	0	0	1	1
1461	3015	0	A	3007	G	6	0	6	0.2	3007	938	2069	1	0	1	6	0	6	1	0	1	938	2069	0	MT-RNR1	rRNA	0	0	1	1
1462	2985	0	G	2968	A	11	0	11	0.37	11	0	11	3	0	3	2968	914	2054	3	2	1	914	2054	0	MT-RNR1	rRNA	0	0	1	1
1463	3051	0	G	3040	A	10	2	8	0.33	10	2	8	0	0	0	3040	891	2149	1	0	1	891	2149	0	MT-RNR1	rRNA	0	0	1	1
1464	3057	0	G	3034	A	12	0	12	0.39	12	0	12	8	1	7	3034	882	2152	3	1	2	882	2152	0	MT-RNR1	rRNA	0	0	1	1
1465	2974	0	C	2953	A	11	3	8	0.37	11	3	8	2953	893	2060	6	0	6	4	0	4	893	2060	0	MT-RNR1	rRNA	0	0	1	1
1466	2872	0	C	2858	G	7	1	6	0.24	5	2	3	2858	914	1944	7	1	6	2	0	2	914	1944	0	MT-RNR1	rRNA	0	0	1	1
1467	3112	0	C	3102	A	5	1	4	0.16	5	1	4	3102	878	2224	4	0	4	1	0	1	878	2224	0	MT-RNR1	rRNA	0	0	1	1
1468	3083	0	T	3061	G	12	0	12	0.39	4	0	4	6	0	6	12	0	12	3061	876	2185	876	2185	0	MT-RNR1	rRNA	0	0	1	1
1469	3049	0	G	3044	A	3	0	3	0.1	3	0	3	2	0	2	3044	861	2183	0	0	0	861	2183	0	MT-RNR1	rRNA	0	0	1	1
1470	3100	0	A	3096	T	3	0	3	0.1	3096	854	2242	0	0	0	1	0	1	3	0	3	854	2242	0	MT-RNR1	rRNA	0	0	1	1
1471	3173	3	A	3166	C	5	0	5	0.16	3166	864	2302	5	0	5	1	0	1	1	0	1	864	2302	0	MT-RNR1	rRNA	0	0	1	1
1472	3211	0	G	3201	T	7	0	7	0.22	0	0	0	3	1	2	3201	852	2349	7	0	7	852	2349	0	MT-RNR1	rRNA	0	0	1	1
1473	3246	0	C	3240	A	4	1	3	0.12	4	1	3	3240	885	2355	0	0	0	2	0	2	885	2355	0	MT-RNR1	rRNA	0	0	1	1
1474	3193	0	G	3187	A	3	0	3	0.09	3	0	3	0	0	0	3187	890	2297	3	1	2	890	2297	0	MT-RNR1	rRNA	0	0	1	1
1475	3259	0	C	3256	A	1	0	1	0.03	1	0	1	3256	890	2366	1	0	1	1	1	0	890	2366	0	MT-RNR1	rRNA	0	0	1	1
1476	3220	0	G	3209	A	5	0	5	0.16	5	0	5	3	0	3	3209	894	2315	3	0	3	894	2315	0	MT-RNR1	rRNA	0	0	1	1
1477	2930	0	T	2914	A	6	3	3	0.2	6	3	3	4	1	3	6	1	5	2914	861	2053	861	2053	8	MT-RNR1	rRNA	1	0	1	1
1478	2779	0	A	2771	G	7	0	7	0.25	2771	857	1914	0	0	0	7	0	7	1	1	0	857	1914	9	MT-RNR1	rRNA	1	0	1	1
1479	2862	0	C	2858	A	3	0	3	0.1	3	0	3	2858	855	2003	0	0	0	1	0	1	855	2003	10	MT-RNR1	rRNA	1	0	1	1
1480	2455	0	A	2454	T	1	0	1	0.04	2454	847	1607	0	0	0	0	0	0	1	0	1	847	1607	11	MT-RNR1	rRNA	1	0	1	1
1481	2758	0	C	2751	T	4	0	4	0.15	2	0	2	2751	851	1900	1	1	0	4	0	4	851	1900	12	MT-RNR1	rRNA	1	0	1	1
1482	2443	0	A	2442	T	1	0	1	0.04	2442	848	1594	0	0	0	0	0	0	1	0	1	848	1594	13	MT-RNR1	rRNA	1	0	1	1
1483	2836	0	C	2830	A	4	1	3	0.14	4	1	3	2830	849	1981	0	0	0	2	1	1	849	1981	14	MT-RNR1	rRNA	1	0	1	1
1484	2829	0	C	2822	A	4	0	4	0.14	4	0	4	2822	864	1958	1	0	1	2	0	2	864	1958	7	MT-RNR1	rRNA	1	0	1	1
1485	2642	0	G	2633	T	5	1	4	0.19	4	0	4	0	0	0	2633	739	1894	5	1	4	739	1894	0	MT-RNR1	rRNA	0	0	1	1
1486	2660	0	C	2652	A	4	0	4	0.15	4	0	4	2652	732	1920	4	0	4	0	0	0	732	1920	0	MT-RNR1	rRNA	0	0	1	1
1487	2541	0	C	2537	A	2	0	2	0.08	2	0	2	2537	732	1805	2	0	2	0	0	0	732	1805	0	MT-RNR1	rRNA	0	0	1	1
1488	2500	0	C	2497	A	1	1	0	0.04	1	1	0	2497	729	1768	1	0	1	1	1	0	729	1768	0	MT-RNR1	rRNA	0	0	1	1
1489	2444	0	G	2432	A	9	3	6	0.37	9	3	6	0	0	0	2432	722	1710	3	1	2	722	1710	0	MT-RNR1	rRNA	0	0	1	1
1490	2181	0	T	2170	A	4	3	1	0.18	4	3	1	4	0	4	3	1	2	2170	697	1473	697	1473	0	MT-RNR1	rRNA	0	0	1	1
1491	2151	0	C	2147	G	2	2	0	0.09	1	1	0	2147	707	1440	2	2	0	1	1	0	707	1440	0	MT-RNR1	rRNA	0	0	1	1
1492	1837	0	A	1830	G	4	0	4	0.22	1830	708	1122	1	1	0	4	0	4	2	1	1	708	1122	0	MT-RNR1	rRNA	0	0	1	1
1493	2142	0	C	2136	T	4	2	2	0.19	1	0	1	2136	712	1424	1	0	1	4	2	2	712	1424	0	MT-RNR1	rRNA	0	0	1	1
1494	2044	0	C	2043	A	1	0	1	0.05	1	0	1	2043	681	1362	0	0	0	0	0	0	681	1362	0	MT-RNR1	rRNA	0	0	1	1
1495	2038	0	C	2037	A	1	1	0	0.05	1	1	0	2037	674	1363	0	0	0	0	0	0	674	1363	0	MT-RNR1	rRNA	0	0	1	1
1496	2009	0	T	2003	G	3	0	3	0.15	2	0	2	1	0	1	3	0	3	2003	670	1333	670	1333	0	MT-RNR1	rRNA	0	0	1	1
1497	2037	0	C	2034	T	3	0	3	0.15	0	0	0	2034	676	1358	0	0	0	3	0	3	676	1358	0	MT-RNR1	rRNA	0	0	1	1
1498	2105	0	C	2103	G	2	0	2	0.1	0	0	0	2103	703	1400	2	0	2	0	0	0	703	1400	0	MT-RNR1	rRNA	0	0	1	1
1499	2044	0	T	2026	A	7	0	7	0.34	7	0	7	5	0	5	6	0	6	2026	649	1377	649	1377	0	MT-RNR1	rRNA	0	0	1	1
1500	2002	0	C	1996	A	3	1	2	0.15	3	1	2	1996	624	1372	1	0	1	2	0	2	624	1372	0	MT-RNR1	rRNA	0	0	1	1
1501	1975	0	A	1969	G	6	2	4	0.3	1969	595	1374	0	0	0	6	2	4	0	0	0	595	1374	0	MT-RNR1	rRNA	0	0	1	1
1502	2015	0	A	2014	G	1	0	1	0.05	2014	590	1424	0	0	0	1	0	1	0	0	0	590	1424	0	MT-RNR1	rRNA	0	0	1	1
1503	2028	0	G	2027	C	1	0	1	0.05	0	0	0	1	0	1	2027	593	1434	0	0	0	593	1434	0	MT-RNR1	rRNA	0	0	1	1
1504	1987	0	T	1985	A	1	1	0	0.05	1	1	0	1	0	1	0	0	0	1985	587	1398	587	1398	0	MT-RNR1	rRNA	0	0	1	1
1505	1943	0	A	1942	G	1	0	1	0.05	1942	534	1408	0	0	0	1	0	1	0	0	0	534	1408	0	MT-RNR1	rRNA	0	0	1	1
1506	1943	0	T	1941	A	2	1	1	0.1	2	1	1	0	0	0	0	0	0	1941	535	1406	535	1406	0	MT-RNR1	rRNA	0	0	1	1
1507	1938	0	A	1937	T	1	0	1	0.05	1937	540	1397	0	0	0	0	0	0	1	0	1	540	1397	0	MT-RNR1	rRNA	0	0	1	1
1508	1973	0	C	1971	A	2	0	2	0.1	2	0	2	1971	555	1416	0	0	0	0	0	0	555	1416	0	MT-RNR1	rRNA	0	0	1	1
1509	1967	0	T	1967	A	0	0	0	0	0	0	0	0	0	0	0	0	0	1967	557	1410	557	1410	0	MT-RNR1	rRNA	0	0	1	1
1510	1974	0	T	1973	G	1	0	1	0.05	0	0	0	0	0	0	1	0	1	1973	560	1413	560	1413	0	MT-RNR1	rRNA	0	0	1	1
1511	1988	0	C	1986	A	2	0	2	0.1	2	0	2	1986	564	1422	0	0	0	0	0	0	564	1422	0	MT-RNR1	rRNA	0	0	1	1
1512	1991	0	A	1990	T	1	0	1	0.05	1990	563	1427	0	0	0	0	0	0	1	0	1	563	1427	0	MT-RNR1	rRNA	0	0	1	1
1513	1992	0	A	1991	G	1	0	1	0.05	1991	560	1431	0	0	0	1	0	1	0	0	0	560	1431	0	MT-RNR1	rRNA	0	0	1	1
1514	1998	0	A	1997	T	1	0	1	0.05	1997	567	1430	0	0	0	0	0	0	1	0	1	567	1430	0	MT-RNR1	rRNA	0	0	1	1
1515	2008	0	G	2007	T	1	0	1	0.05	0	0	0	0	0	0	2007	578	1429	1	0	1	578	1429	0	MT-RNR1	rRNA	0	0	1	1
1516	2008	0	G	2008	A	0	0	0	0	0	0	0	0	0	0	2008	579	1429	0	0	0	579	1429	0	MT-RNR1	rRNA	0	0	1	1
1517	2000	0	A	2000	T	0	0	0	0	2000	579	1421	0	0	0	0	0	0	0	0	0	579	1421	0	MT-RNR1	rRNA	0	0	1	1
1518	2017	0	C	2014	A	2	2	0	0.1	2	2	0	2014	579	1435	0	0	0	1	1	0	579	1435	0	MT-RNR1	rRNA	0	0	1	1
1519	2025	0	A	2025	T	0	0	0	0	2025	585	1440	0	0	0	0	0	0	0	0	0	585	1440	0	MT-RNR1	rRNA	0	0	1	1
1520	2036	0	T	2036	A	0	0	0	0	0	0	0	0	0	0	0	0	0	2036	595	1441	595	1441	0	MT-RNR1	rRNA	0	0	1	1
1521	2037	0	T	2036	A	1	1	0	0.05	1	1	0	0	0	0	0	0	0	2036	595	1441	595	1441	0	MT-RNR1	rRNA	0	0	1	1
1522	2036	0	T	2036	A	0	0	0	0	0	0	0	0	0	0	0	0	0	2036	593	1443	593	1443	0	MT-RNR1	rRNA	0	0	1	1
1523	2047	0	A	2047	T	0	0	0	0	2047	596	1451	0	0	0	0	0	0	0	0	0	596	1451	0	MT-RNR1	rRNA	0	0	1	1
1524	2084	0	A	2084	T	0	0	0	0	2084	591	1493	0	0	0	0	0	0	0	0	0	591	1493	0	MT-RNR1	rRNA	0	0	1	1
1525	2120	0	C	2115	T	3	0	3	0.14	2	1	1	2115	599	1516	0	0	0	3	0	3	599	1516	0	MT-RNR1	rRNA	0	0	1	1
1526	2120	0	T	2119	C	1	0	1	0.05	0	0	0	1	0	1	0	0	0	2119	607	1512	607	1512	2	MT-RNR1	rRNA	1	0	1	1
1527	2143	0	A	2142	T	1	0	1	0.05	2142	613	1529	0	0	0	0	0	0	1	0	1	613	1529	6	MT-RNR1	rRNA	1	0	1	1
1528	2146	0	A	2145	G	1	0	1	0.05	2145	610	1535	0	0	0	1	0	1	0	0	0	610	1535	5	MT-RNR1	rRNA	1	0	1	1
1529	2134	0	A	2133	G	1	1	0	0.05	2133	611	1522	0	0	0	1	1	0	0	0	0	611	1522	4	MT-RNR1	rRNA	1	0	1	1
1530	1936	0	A	1936	T	0	0	0	0	1936	610	1326	0	0	0	0	0	0	0	0	0	610	1326	3	MT-RNR1	rRNA	1	0	1	1
1531	2162	0	C	2161	A	1	0	1	0.05	1	0	1	2161	614	1547	0	0	0	0	0	0	614	1547	1	MT-RNR1	rRNA	1	0	1	1
1532	2159	0	C	2156	A	3	2	1	0.14	3	2	1	2156	606	1550	0	0	0	0	0	0	606	1550	5	MT-RNR1	rRNA	1	0	1	1
1533	2161	0	C	2157	A	2	1	1	0.09	2	1	1	2157	606	1551	1	1	0	1	1	0	606	1551	4	MT-RNR1	rRNA	1	0	1	1
1534	2155	0	C	2152	A	1	1	0	0.05	1	1	0	2152	608	1544	1	0	1	1	0	1	608	1544	3	MT-RNR1	rRNA	1	0	1	1
1535	2149	0	T	2144	A	3	1	2	0.14	3	1	2	2	1	1	0	0	0	2144	613	1531	613	1531	1	MT-RNR1	rRNA	1	0	1	1
1536	2148	0	A	2146	T	1	0	1	0.05	2146	615	1531	1	1	0	0	0	0	1	0	1	615	1531	0	MT-RNR1	rRNA	0	0	1	1
1537	2151	0	C	2145	A	4	3	1	0.19	4	3	1	2145	603	1542	2	2	0	0	0	0	603	1542	0	MT-RNR1	rRNA	0	0	1	1
1538	2147	0	G	2142	A	2	2	0	0.09	2	2	0	1	0	1	2142	599	1543	2	1	1	599	1543	0	MT-RNR1	rRNA	0	0	1	1
1539	2142	0	C	2138	A	2	2	0	0.09	2	2	0	2138	609	1529	0	0	0	2	2	0	609	1529	0	MT-RNR1	rRNA	0	0	1	1
1540	2144	0	A	2139	C	2	2	0	0.09	2139	608	1531	2	2	0	2	0	2	1	1	0	608	1531	0	MT-RNR1	rRNA	0	0	1	1
1541	2150	0	T	2146	C	2	1	1	0.09	0	0	0	2	1	1	2	2	0	2146	618	1528	618	1528	0	MT-RNR1	rRNA	0	0	1	1
1542	2140	0	T	2140	A	0	0	0	0	0	0	0	0	0	0	0	0	0	2140	602	1538	602	1538	8	MT-RNR1	rRNA	1	0	1	1
1543	2156	0	T	2156	A	0	0	0	0	0	0	0	0	0	0	0	0	0	2156	601	1555	601	1555	9	MT-RNR1	rRNA	1	0	1	1
1544	2147	0	A	2145	T	2	0	2	0.09	2145	591	1554	0	0	0	0	0	0	2	0	2	591	1554	10	MT-RNR1	rRNA	1	0	1	1
1545	2142	0	T	2141	C	1	1	0	0.05	0	0	0	1	1	0	0	0	0	2141	594	1547	594	1547	11	MT-RNR1	rRNA	1	0	1	1
1546	2132	0	A	2132	T	0	0	0	0	2132	597	1535	0	0	0	0	0	0	0	0	0	597	1535	12	MT-RNR1	rRNA	1	0	1	1
1547	2084	0	T	2084	A	0	0	0	0	0	0	0	0	0	0	0	0	0	2084	583	1501	583	1501	13	MT-RNR1	rRNA	1	0	1	1
1548	2079	0	A	2079	T	0	0	0	0	2079	585	1494	0	0	0	0	0	0	0	0	0	585	1494	14	MT-RNR1	rRNA	1	0	1	1
1549	2025	0	G	2023	A	1	0	1	0.05	1	0	1	0	0	0	2023	533	1490	1	0	1	533	1490	7	MT-RNR1	rRNA	1	0	1	1
1550	1934	0	A	1934	T	0	0	0	0	1934	457	1477	0	0	0	0	0	0	0	0	0	457	1477	0	MT-RNR1	rRNA	0	0	1	1
1551	1910	0	G	1909	T	1	0	1	0.05	0	0	0	0	0	0	1909	462	1447	1	0	1	462	1447	0	MT-RNR1	rRNA	0	0	1	1
1552	1912	0	G	1910	A	1	0	1	0.05	1	0	1	0	0	0	1910	466	1444	1	0	1	466	1444	0	MT-RNR1	rRNA	0	0	1	1
1553	1914	0	A	1911	T	3	0	3	0.16	1911	467	1444	0	0	0	0	0	0	3	0	3	467	1444	0	MT-RNR1	rRNA	0	0	1	1
1554	1935	0	G	1933	C	2	0	2	0.1	0	0	0	2	0	2	1933	489	1444	0	0	0	489	1444	0	MT-RNR1	rRNA	0	0	1	1
1555	1942	0	A	1939	T	2	0	2	0.1	1939	495	1444	0	0	0	1	0	1	2	0	2	495	1444	0	MT-RNR1	rRNA	0	0	1	1
1556	1957	0	C	1956	G	1	1	0	0.05	0	0	0	1956	509	1447	1	1	0	0	0	0	509	1447	0	MT-RNR1	rRNA	0	0	1	1
1557	1946	0	A	1942	G	4	0	4	0.21	1942	503	1439	0	0	0	4	0	4	0	0	0	503	1439	0	MT-RNR1	rRNA	0	0	1	1
1558	1949	0	A	1947	G	2	1	1	0.1	1947	500	1447	0	0	0	2	1	1	0	0	0	500	1447	0	MT-RNR1	rRNA	0	0	1	1
1559	1974	0	G	1972	A	1	1	0	0.05	1	1	0	0	0	0	1972	525	1447	1	0	1	525	1447	0	MT-RNR1	rRNA	0	0	1	1
1560	1924	0	T	1923	A	1	1	0	0.05	1	1	0	0	0	0	0	0	0	1923	522	1401	522	1401	0	MT-RNR1	rRNA	0	0	1	1
1561	1940	0	C	1935	T	3	2	1	0.15	1	1	0	1935	528	1407	1	1	0	3	2	1	528	1407	0	MT-RNR1	rRNA	0	0	1	1
1562	1927	0	G	1925	A	2	1	1	0.1	2	1	1	0	0	0	1925	528	1397	0	0	0	528	1397	0	MT-RNR1	rRNA	0	0	1	1
1563	1868	0	T	1865	A	1	1	0	0.05	1	1	0	1	0	1	1	1	0	1865	524	1341	524	1341	0	MT-RNR1	rRNA	0	0	1	1
1564	1803	1	A	1793	G	4	1	3	0.22	1793	526	1267	3	1	2	4	1	3	3	0	3	526	1267	0	MT-RNR1	rRNA	0	0	1	1
1565	1693	0	A	1691	G	2	2	0	0.12	1691	502	1189	0	0	0	2	2	0	0	0	0	502	1189	0	MT-RNR1	rRNA	0	0	1	1
1566	1579	0	C	1573	A	4	2	2	0.25	4	2	2	1573	472	1101	2	2	0	0	0	0	472	1101	0	MT-RNR1	rRNA	0	0	1	1
1567	1258	0	A	1255	T	3	2	1	0.24	1255	461	794	0	0	0	0	0	0	3	2	1	461	794	0	MT-RNR1	rRNA	0	0	1	1
1568	1249	0	T	1241	G	5	4	1	0.4	1	1	0	2	1	1	5	4	1	1241	454	787	454	787	0	MT-RNR1	rRNA	0	0	1	1
1569	1248	0	G	1243	A	4	4	0	0.32	4	4	0	1	1	0	1243	462	781	0	0	0	462	781	0	MT-RNR1	rRNA	0	0	1	1
1570	1178	0	G	1172	T	5	4	1	0.42	1	1	0	0	0	0	1172	464	708	5	4	1	464	708	0	MT-RNR1	rRNA	0	0	1	1
1571	1090	0	T	1021	C	29	4	25	2.66	27	2	25	29	4	25	13	1	12	1021	449	572	449	572	0	MT-RNR1	rRNA	0	0	1	1
1572	1042	0	A	1031	G	11	6	5	1.06	1031	453	578	0	0	0	11	6	5	0	0	0	453	578	0	MT-RNR1	rRNA	0	0	1	0
1573	986	0	A	986	T	0	0	0	0	986	416	570	0	0	0	0	0	0	0	0	0	416	570	0	MT-RNR1	rRNA	0	1	1	1
1574	986	0	G	986	A	0	0	0	0	0	0	0	0	0	0	986	418	568	0	0	0	418	568	0	MT-RNR1	rRNA	0	1	1	1
1575	970	0	T	970	A	0	0	0	0	0	0	0	0	0	0	0	0	0	970	407	563	407	563	0	MT-RNR1	rRNA	0	1	1	1
1576	981	0	G	980	A	1	1	0	0.1	1	1	0	0	0	0	980	418	562	0	0	0	418	562	0	MT-RNR1	rRNA	0	1	1	1
1577	968	0	T	965	C	3	0	3	0.31	0	0	0	3	0	3	0	0	0	965	412	553	412	553	0	MT-RNR1	rRNA	0	1	1	1
1578	975	0	A	973	G	2	0	2	0.21	973	414	559	0	0	0	2	0	2	0	0	0	414	559	0	MT-RNR1	rRNA	0	1	1	1
1579	1001	0	C	999	T	1	1	0	0.1	0	0	0	999	443	556	1	0	1	1	1	0	443	556	0	MT-RNR1	rRNA	0	0	1	1
1580	1006	0	T	1000	A	2	0	2	0.2	2	0	2	2	2	0	2	0	2	1000	459	541	459	541	0	MT-RNR1	rRNA	0	0	1	1
1581	1025	0	G	1023	T	2	2	0	0.2	0	0	0	0	0	0	1023	484	539	2	2	0	484	539	0	MT-RNR1	rRNA	0	0	1	1
1582	1032	0	G	1028	A	2	1	1	0.19	2	1	1	2	1	1	1028	483	545	0	0	0	483	545	0	MT-RNR1	rRNA	0	0	1	1
1583	1010	0	A	997	G	10	1	9	0.99	997	472	525	2	0	2	10	1	9	1	1	0	472	525	0	MT-RNR1	rRNA	0	0	1	1
1584	992	0	A	985	G	6	0	6	0.6	985	464	521	0	0	0	6	0	6	1	0	1	464	521	0	MT-RNR1	rRNA	0	1	1	1
1585	988	0	A	988	T	0	0	0	0	988	468	520	0	0	0	0	0	0	0	0	0	468	520	0	MT-RNR1	rRNA	0	1	1	1
1586	992	0	G	992	A	0	0	0	0	0	0	0	0	0	0	992	474	518	0	0	0	474	518	0	MT-RNR1	rRNA	0	1	1	1
1587	989	0	T	987	A	1	0	1	0.1	1	0	1	0	0	0	1	1	0	987	468	519	468	519	0	MT-RNR1	rRNA	0	1	1	1
1588	996	0	G	994	A	1	1	0	0.1	1	1	0	1	0	1	994	471	523	0	0	0	471	523	0	MT-RNR1	rRNA	0	1	1	1
1589	998	0	C	998	A	0	0	0	0	0	0	0	998	467	531	0	0	0	0	0	0	467	531	0	MT-RNR1	rRNA	0	1	1	1
1590	1000	1	A	998	T	1	0	1	0.1	998	468	530	0	0	0	1	1	0	1	0	1	468	530	0	MT-RNR1	rRNA	0	0	1	1
1591	1022	0	C	1021	G	1	1	0	0.1	0	0	0	1021	487	534	1	1	0	0	0	0	487	534	0	MT-RNR1	rRNA	0	0	1	1
1592	1020	0	T	1017	A	2	2	0	0.2	2	2	0	1	0	1	0	0	0	1017	488	529	488	529	0	MT-RNR1	rRNA	0	0	1	1
1593	1005	0	T	1005	A	0	0	0	0	0	0	0	0	0	0	0	0	0	1005	476	529	476	529	0	MT-RNR1	rRNA	0	0	1	1
1594	1024	0	G	1023	C	1	1	0	0.1	0	0	0	1	1	0	1023	472	551	0	0	0	472	551	0	MT-RNR1	rRNA	0	0	1	1
1595	1027	0	G	1026	T	1	1	0	0.1	0	0	0	0	0	0	1026	471	555	1	1	0	471	555	0	MT-RNR1	rRNA	0	0	1	1
1596	1027	0	A	1027	T	0	0	0	0	1027	474	553	0	0	0	0	0	0	0	0	0	474	553	0	MT-RNR1	rRNA	0	0	1	1
1597	1019	0	C	1019	A	0	0	0	0	0	0	0	1019	475	544	0	0	0	0	0	0	475	544	0	MT-RNR1	rRNA	0	0	1	1
1598	947	0	G	946	T	1	1	0	0.11	0	0	0	0	0	0	946	442	504	1	1	0	442	504	0	MT-RNR1	rRNA	0	1	1	1
1599	942	0	A	941	G	1	1	0	0.11	941	443	498	0	0	0	1	1	0	0	0	0	443	498	0	MT-RNR1	rRNA	0	1	1	1
1600	935	0	A	934	G	1	0	1	0.11	934	435	499	0	0	0	1	0	1	0	0	0	435	499	0	MT-RNR1	rRNA	0	1	1	1
1601	974	0	C	972	A	2	0	2	0.21	2	0	2	972	473	499	0	0	0	0	0	0	473	499	0	MT-RNR1	rRNA	0	1	1	1
1602	935	0	C	920	A	11	3	8	1.18	11	3	8	920	486	434	4	0	4	0	0	0	486	434	0	MT-TV	tRNA	0	1	1	1
1603	924	0	A	921	T	1	1	0	0.11	921	491	430	1	0	1	1	0	1	1	1	0	491	430	0	MT-TV	tRNA	0	1	1	1
1604	921	0	G	918	T	2	1	1	0.22	1	1	0	0	0	0	918	483	435	2	1	1	483	435	0	MT-TV	tRNA	0	1	1	1
1605	910	0	A	909	G	1	0	1	0.11	909	483	426	0	0	0	1	0	1	0	0	0	483	426	0	MT-TV	tRNA	0	1	1	1
1606	921	0	G	918	A	2	2	0	0.22	2	2	0	0	0	0	918	492	426	1	1	0	492	426	0	MT-TV	tRNA	0	1	1	1
1607	891	0	T	885	A	4	3	1	0.45	4	3	1	1	1	0	1	1	0	885	464	421	464	421	0	MT-TV	tRNA	0	1	1	1
1608	911	0	G	910	A	1	0	1	0.11	1	0	1	0	0	0	910	492	418	0	0	0	492	418	0	MT-TV	tRNA	0	1	1	1
1609	905	0	T	904	G	1	1	0	0.11	0	0	0	0	0	0	1	1	0	904	477	427	477	427	0	MT-TV	tRNA	0	1	1	1
1610	976	0	A	967	T	4	0	4	0.41	967	488	479	4	1	3	1	0	1	4	0	4	488	479	0	MT-TV	tRNA	0	1	1	1
1611	1089	0	G	1082	T	4	1	3	0.37	1	1	0	2	0	2	1082	601	481	4	1	3	601	481	0	MT-TV	tRNA	0	0	1	1
1612	1241	0	C	1238	T	2	0	2	0.16	1	0	1	1238	745	493	0	0	0	2	0	2	745	493	0	MT-TV	tRNA	0	0	1	1
1613	1324	4	T	1320	A	2	0	2	0.15	2	0	2	2	1	1	0	0	0	1320	831	489	831	489	0	MT-TV	tRNA	0	0	1	1
1614	1332	0	T	1330	C	1	1	0	0.08	0	0	0	1	1	0	1	0	1	1330	838	492	838	492	0	MT-TV	tRNA	0	0	1	1
1615	1345	0	A	1342	C	2	0	2	0.15	1342	840	502	2	0	2	1	0	1	0	0	0	840	502	0	MT-TV	tRNA	0	0	1	1
1616	1350	0	A	1347	T	3	1	2	0.22	1347	849	498	0	0	0	0	0	0	3	1	2	849	498	0	MT-TV	tRNA	0	0	1	1
1617	1453	0	C	1453	A	0	0	0	0	0	0	0	1453	949	504	0	0	0	0	0	0	949	504	0	MT-TV	tRNA	0	0	1	1
1618	1458	0	A	1456	T	1	0	1	0.07	1456	957	499	1	1	0	0	0	0	1	0	1	957	499	0	MT-TV	tRNA	0	0	1	1
1619	1480	0	C	1479	G	1	0	1	0.07	0	0	0	1479	976	503	1	0	1	0	0	0	976	503	0	MT-TV	tRNA	0	0	1	1
1620	1614	0	A	1612	C	1	0	1	0.06	1612	1078	534	1	0	1	1	1	0	0	0	0	1078	534	0	MT-TV	tRNA	0	0	1	1
1621	1656	0	A	1654	C	1	0	1	0.06	1654	1114	540	1	0	1	1	0	1	0	0	0	1114	540	0	MT-TV	tRNA	0	0	1	1
1622	1666	0	A	1666	T	0	0	0	0	1666	1119	547	0	0	0	0	0	0	0	0	0	1119	547	0	MT-TV	tRNA	0	0	1	1
1623	1652	0	G	1648	T	3	2	1	0.18	1	0	1	0	0	0	1648	1117	531	3	2	1	1117	531	0	MT-TV	tRNA	0	0	1	1
1624	1616	0	C	1613	A	2	1	1	0.12	2	1	1	1613	1126	487	0	0	0	1	1	0	1126	487	0	MT-TV	tRNA	0	0	1	1
1625	1581	0	A	1579	T	1	0	1	0.06	1579	1135	444	0	0	0	1	1	0	1	0	1	1135	444	0	MT-TV	tRNA	0	0	1	1
1626	1702	0	C	1700	T	1	1	0	0.06	0	0	0	1700	1215	485	1	0	1	1	1	0	1215	485	0	MT-TV	tRNA	0	0	1	1
1627	1876	0	C	1873	A	3	2	1	0.16	3	2	1	1873	1389	484	0	0	0	0	0	0	1389	484	0	MT-TV	tRNA	0	0	1	1
1628	1903	0	C	1898	A	3	2	1	0.16	3	2	1	1898	1423	475	0	0	0	2	1	1	1423	475	0	MT-TV	tRNA	0	0	1	1
1629	1906	0	A	1904	C	1	0	1	0.05	1904	1434	470	1	0	1	1	0	1	0	0	0	1434	470	0	MT-TV	tRNA	0	0	1	1
1630	1909	0	A	1908	T	1	0	1	0.05	1908	1433	475	0	0	0	0	0	0	1	0	1	1433	475	0	MT-TV	tRNA	0	0	1	1
1631	2223	0	C	2221	A	1	1	0	0.04	1	1	0	2221	1733	488	1	1	0	0	0	0	1733	488	0	MT-TV	tRNA	0	0	1	1
1632	2244	0	T	2241	A	2	1	1	0.09	2	1	1	0	0	0	1	0	1	2241	1755	486	1755	486	0	MT-TV	tRNA	0	0	1	1
1633	2295	0	T	2295	A	0	0	0	0	0	0	0	0	0	0	0	0	0	2295	1770	525	1770	525	0	MT-TV	tRNA	0	0	1	1
1634	2299	0	A	2298	G	1	1	0	0.04	2298	1768	530	0	0	0	1	1	0	0	0	0	1768	530	0	MT-TV	tRNA	0	0	1	1
1635	2330	0	C	2328	A	1	1	0	0.04	1	1	0	2328	1776	552	1	0	1	0	0	0	1776	552	0	MT-TV	tRNA	0	0	1	1
1636	2324	0	A	2323	T	1	0	1	0.04	2323	1772	551	0	0	0	0	0	0	1	0	1	1772	551	0	MT-TV	tRNA	0	0	1	1
1637	2379	0	C	2379	A	0	0	0	0	0	0	0	2379	1775	604	0	0	0	0	0	0	1775	604	0	MT-TV	tRNA	0	0	1	1
1638	2390	0	T	2390	A	0	0	0	0	0	0	0	0	0	0	0	0	0	2390	1786	604	1786	604	0	MT-TV	tRNA	0	0	1	1
1639	2398	0	T	2398	A	0	0	0	0	0	0	0	0	0	0	0	0	0	2398	1774	624	1774	624	0	MT-TV	tRNA	0	0	1	1
1640	2398	0	A	2397	C	1	0	1	0.04	2397	1770	627	1	0	1	0	0	0	0	0	0	1770	627	0	MT-TV	tRNA	0	0	1	1
1641	2488	0	G	2484	T	3	1	2	0.12	1	1	0	0	0	0	2484	1861	623	3	1	2	1861	623	0	MT-TV	tRNA	0	0	1	1
1642	2503	0	G	2501	T	2	2	0	0.08	0	0	0	0	0	0	2501	1883	618	2	2	0	1883	618	0	MT-TV	tRNA	0	0	1	1
1643	2518	0	A	2517	T	1	0	1	0.04	2517	1880	637	0	0	0	0	0	0	1	0	1	1880	637	0	MT-TV	tRNA	0	0	1	1
1644	2525	0	G	2518	T	5	2	3	0.2	1	1	0	1	0	1	2518	1879	639	5	2	3	1879	639	0	MT-TV	tRNA	0	0	1	1
1645	2503	0	A	2500	T	2	1	1	0.08	2500	1881	619	1	0	1	0	0	0	2	1	1	1881	619	0	MT-TV	tRNA	0	0	1	1
1646	2652	0	T	2652	A	0	0	0	0	0	0	0	0	0	0	0	0	0	2652	2018	634	2018	634	0	MT-TV	tRNA	0	0	1	1
1647	2703	0	T	2703	A	0	0	0	0	0	0	0	0	0	0	0	0	0	2703	2051	652	2051	652	0	MT-TV	tRNA	0	0	1	1
1648	2725	0	T	2724	C	1	1	0	0.04	0	0	0	1	1	0	0	0	0	2724	2052	672	2052	672	0	MT-TV	tRNA	0	0	1	1
1649	2738	0	C	2737	T	1	0	1	0.04	0	0	0	2737	2051	686	0	0	0	1	0	1	2051	686	0	MT-TV	tRNA	0	0	1	1
1650	2749	0	A	2749	T	0	0	0	0	2749	2055	694	0	0	0	0	0	0	0	0	0	2055	694	0	MT-TV	tRNA	0	0	1	1
1651	2819	0	A	2818	T	1	0	1	0.04	2818	2052	766	0	0	0	0	0	0	1	0	1	2052	766	0	MT-TV	tRNA	0	0	1	1
1652	2978	0	C	2978	A	0	0	0	0	0	0	0	2978	2205	773	0	0	0	0	0	0	2205	773	0	MT-TV	tRNA	0	0	1	1
1653	2991	0	T	2991	A	0	0	0	0	0	0	0	0	0	0	0	0	0	2991	2213	778	2213	778	0	MT-TV	tRNA	0	0	1	1
1654	2983	0	T	2981	C	1	0	1	0.03	0	0	0	1	0	1	1	1	0	2981	2190	791	2190	791	0	MT-TV	tRNA	0	0	1	1
1655	2974	0	A	2974	T	0	0	0	0	2974	2183	791	0	0	0	0	0	0	0	0	0	2183	791	0	MT-TV	tRNA	0	0	1	1
1656	2957	0	A	2956	G	1	0	1	0.03	2956	2170	786	0	0	0	1	0	1	0	0	0	2170	786	0	MT-TV	tRNA	0	0	1	1
1657	2982	0	C	2981	T	1	0	1	0.03	0	0	0	2981	2190	791	0	0	0	1	0	1	2190	791	0	MT-TV	tRNA	0	0	1	1
1658	2964	0	T	2962	A	1	1	0	0.03	1	1	0	1	1	0	0	0	0	2962	2184	778	2184	778	0	MT-TV	tRNA	0	0	1	1
1659	2942	0	T	2942	A	0	0	0	0	0	0	0	0	0	0	0	0	0	2942	2163	779	2163	779	0	MT-TV	tRNA	0	0	1	1
1660	2939	0	G	2934	T	3	3	0	0.1	2	2	0	0	0	0	2934	2154	780	3	3	0	2154	780	0	MT-TV	tRNA	0	0	1	1
1661	2909	0	A	2908	G	1	1	0	0.03	2908	2155	753	0	0	0	1	1	0	0	0	0	2155	753	0	MT-TV	tRNA	0	0	1	1
1662	2968	0	C	2957	A	10	9	1	0.34	10	9	1	2957	2162	795	1	0	1	0	0	0	2162	795	0	MT-TV	tRNA	0	0	1	1
1663	2932	0	C	2929	A	2	1	1	0.07	2	1	1	2929	2167	762	0	0	0	1	0	1	2167	762	0	MT-TV	tRNA	0	0	1	1
1664	2940	0	G	2934	T	4	1	3	0.14	0	0	0	2	1	1	2934	2169	765	4	1	3	2169	765	0	MT-TV	tRNA	0	0	1	1
1665	3005	0	C	3000	A	3	1	2	0.1	3	1	2	3000	2219	781	0	0	0	2	2	0	2219	781	0	MT-TV	tRNA	0	0	1	1
1666	3005	0	T	3001	G	3	0	3	0.1	1	0	1	0	0	0	3	0	3	3001	2226	775	2226	775	0	MT-TV	tRNA	0	0	1	1
1667	3078	0	C	3075	A	2	1	1	0.06	2	1	1	3075	2292	783	1	1	0	0	0	0	2292	783	0	MT-TV	tRNA	0	0	1	1
1668	3143	0	T	3135	A	3	0	3	0.1	3	0	3	3	0	3	2	0	2	3135	2294	841	2294	841	0	MT-TV	tRNA	0	0	1	1
1669	3388	0	G	3355	C	12	0	12	0.35	10	0	10	12	0	12	3355	2271	1084	11	3	8	2271	1084	0	MT-TV	tRNA	0	0	1	1
1670	3507	0	A	3457	G	18	0	18	0.51	3457	2277	1180	15	0	15	18	0	18	17	0	17	2277	1180	0	MT-TV	tRNA	0	0	1	1
1671	3705	1	G	3666	T	15	2	13	0.4	12	0	12	12	0	12	3666	2374	1292	15	2	13	2374	1292	0	MT-RNR2	rRNA	0	0	1	1
1672	3765	1	C	3734	A	13	2	11	0.35	13	2	11	3734	2420	1314	5	0	5	13	0	13	2420	1314	0	MT-RNR2	rRNA	0	0	1	1
1673	3753	3	T	3735	A	11	0	11	0.29	11	0	11	5	0	5	2	0	2	3735	2423	1312	2423	1312	0	MT-RNR2	rRNA	0	0	1	1
1674	3767	4	A	3763	C	3	0	3	0.08	3763	2426	1337	3	0	3	1	0	1	0	0	0	2426	1337	0	MT-RNR2	rRNA	0	0	1	1
1675	3761	5	A	3754	T	4	0	4	0.11	3754	2426	1328	3	0	3	0	0	0	4	0	4	2426	1328	0	MT-RNR2	rRNA	0	0	1	1
1676	3665	4	A	3656	G	4	0	4	0.11	3656	2421	1235	2	1	1	4	0	4	3	0	3	2421	1235	0	MT-RNR2	rRNA	0	0	1	1
1677	3842	0	C	3835	A	3	2	1	0.08	3	2	1	3835	2456	1379	1	0	1	3	1	2	2456	1379	0	MT-RNR2	rRNA	0	0	1	1
1678	3885	2	C	3880	T	3	0	3	0.08	0	0	0	3880	2510	1370	2	1	1	3	0	3	2510	1370	0	MT-RNR2	rRNA	0	0	1	1
1679	3879	0	T	3852	G	15	0	15	0.39	5	0	5	7	6	1	15	0	15	3852	2491	1361	2491	1361	0	MT-RNR2	rRNA	0	0	1	1
1680	3880	0	A	3867	T	8	0	8	0.21	3867	2487	1380	1	1	0	4	0	4	8	0	8	2487	1380	0	MT-RNR2	rRNA	0	0	1	1
1681	3907	1	G	3878	T	12	3	9	0.31	5	1	4	12	2	10	3878	2506	1372	12	3	9	2506	1372	2	MT-RNR2	rRNA	1	0	1	1
1682	4487	2	C	4456	T	26	2	24	0.58	4	2	2	4456	3067	1389	1	1	0	26	2	24	3067	1389	6	MT-RNR2	rRNA	1	0	1	1
1683	13123	10	C	13096	T	13	6	7	0.1	10	9	1	13096	11697	1399	4	4	0	13	6	7	11697	1399	5	MT-RNR2	rRNA	1	0	1	0
1684	14269	0	C	14235	T	21	6	15	0.15	9	9	0	14235	12821	1414	4	4	0	21	6	15	12821	1414	4	MT-RNR2	rRNA	1	0	1	0
1685	19399	0	C	19366	A	21	21	0	0.11	21	21	0	19366	17938	1428	2	1	1	10	9	1	17938	1428	3	MT-RNR2	rRNA	1	0	1	1
1686	20334	0	A	20279	G	28	21	7	0.14	20279	18797	1482	20	19	1	28	21	7	7	4	3	18797	1482	1	MT-RNR2	rRNA	1	0	1	0
1687	20895	0	A	20853	C	20	17	3	0.1	20853	19382	1471	20	17	3	15	13	2	7	5	2	19382	1471	0	MT-RNR2	rRNA	0	0	1	1
1688	24973	0	A	24864	G	49	38	11	0.2	24864	23349	1515	37	32	5	49	38	11	23	12	11	23349	1515	0	MT-RNR2	rRNA	0	0	1	0
1689	27287	0	C	27206	A	36	20	16	0.13	36	20	16	27206	25496	1710	16	14	2	29	22	7	25496	1710	0	MT-RNR2	rRNA	0	0	1	0
1690	28249	2	C	28192	T	27	8	19	0.1	24	20	4	28192	26416	1776	6	4	2	27	8	19	26416	1776	0	MT-RNR2	rRNA	0	0	1	0
1691	28416	0	C	28375	A	28	23	5	0.1	28	23	5	28375	26619	1756	4	3	1	9	8	1	26619	1756	0	MT-RNR2	rRNA	0	0	1	0
1692	28393	0	A	28329	T	37	9	28	0.13	28329	26854	1475	8	6	2	19	15	4	37	9	28	26854	1475	0	MT-RNR2	rRNA	0	0	1	0
1693	34314	5	C	34268	T	24	14	10	0.07	19	15	4	34268	32168	2100	3	2	1	24	14	10	32168	2100	0	MT-RNR2	rRNA	0	0	1	0
1694	34359	1	T	34324	C	24	12	12	0.07	7	5	2	24	12	12	4	3	1	34324	32324	2000	32324	2000	0	MT-RNR2	rRNA	0	0	1	0
1695	35163	2	C	35121	T	21	9	12	0.06	11	7	4	35121	32961	2160	10	8	2	21	9	12	32961	2160	0	MT-RNR2	rRNA	0	0	1	0
1696	36380	3	C	36339	A	22	18	4	0.06	22	18	4	36339	34171	2168	10	5	5	9	9	0	34171	2168	0	MT-RNR2	rRNA	0	0	1	1
1697	36249	0	A	36213	G	17	16	1	0.05	36213	34248	1965	6	6	0	17	16	1	13	8	5	34248	1965	0	MT-RNR2	rRNA	0	0	1	1
1698	37385	5	C	37360	T	15	7	8	0.04	7	6	1	37360	34930	2430	3	2	1	15	7	8	34930	2430	0	MT-RNR2	rRNA	0	0	1	0
1699	38717	7	C	38686	A	17	14	3	0.04	17	14	3	38686	36246	2440	1	0	1	13	9	4	36246	2440	0	MT-RNR2	rRNA	0	0	1	1
1700	38955	1	T	38943	A	7	5	2	0.02	7	5	2	4	4	0	1	0	1	38943	36505	2438	36505	2438	0	MT-RNR2	rRNA	0	0	1	1
1701	38984	0	T	38978	C	5	4	1	0.01	1	1	0	5	4	1	0	0	0	38978	36514	2464	36514	2464	0	MT-RNR2	rRNA	0	0	1	1
1702	39026	0	A	39007	G	8	8	0	0.02	39007	36486	2521	7	4	3	8	8	0	4	3	1	36486	2521	0	MT-RNR2	rRNA	0	0	1	1
1703	39777	1	C	39748	A	14	12	2	0.04	14	12	2	39748	37059	2689	2	1	1	13	11	2	37059	2689	0	MT-RNR2	rRNA	0	0	1	1
1704	40067	0	T	40051	C	8	8	0	0.02	1	0	1	8	8	0	7	1	6	40051	37374	2677	37374	2677	0	MT-RNR2	rRNA	0	0	1	1
1705	40476	0	A	40449	G	14	14	0	0.03	40449	37750	2699	2	2	0	14	14	0	11	6	5	37750	2699	0	MT-RNR2	rRNA	0	0	1	1
1706	40829	4	C	40792	T	17	11	6	0.04	16	14	2	40792	37959	2833	4	4	0	17	11	6	37959	2833	0	MT-RNR2	rRNA	0	0	1	0
1707	41342	0	C	41303	A	21	16	5	0.05	21	16	5	41303	38394	2909	2	2	0	16	7	9	38394	2909	0	MT-RNR2	rRNA	0	0	1	0
1708	42886	0	A	42859	G	13	11	2	0.03	42859	39818	3041	3	3	0	13	11	2	11	3	8	39818	3041	0	MT-RNR2	rRNA	0	0	1	1
1709	44642	0	G	44598	T	32	32	0	0.07	4	4	0	8	5	3	44598	41401	3197	32	32	0	41401	3197	0	MT-RNR2	rRNA	0	0	1	1
1710	44897	0	A	44876	T	8	4	4	0.02	44876	41650	3226	5	2	3	8	8	0	8	4	4	41650	3226	0	MT-RNR2	rRNA	0	0	1	1
1711	45842	3	C	45792	A	29	27	2	0.06	29	27	2	45792	42451	3341	5	4	1	16	15	1	42451	3341	0	MT-RNR2	rRNA	0	0	1	1
1712	45814	0	A	45799	G	12	11	1	0.03	45799	42387	3412	1	1	0	12	11	1	2	0	2	42387	3412	0	MT-RNR2	rRNA	0	0	1	1
1713	45778	0	A	45761	C	9	6	3	0.02	45761	42355	3406	9	6	3	4	4	0	4	2	2	42355	3406	0	MT-RNR2	rRNA	0	0	1	1
1714	46396	0	C	46368	T	19	14	5	0.04	7	7	0	46368	42746	3622	2	2	0	19	14	5	42746	3622	0	MT-RNR2	rRNA	0	0	1	0
1715	49669	1	C	49634	A	22	16	6	0.04	22	16	6	49634	45879	3755	2	2	0	11	9	2	45879	3755	0	MT-RNR2	rRNA	0	0	1	0
1716	50006	1	T	49985	C	15	11	4	0.03	3	1	2	15	11	4	3	3	0	49985	45901	4084	45901	4084	0	MT-RNR2	rRNA	0	0	1	1
1717	55106	0	T	55052	C	28	7	21	0.05	2	1	1	28	7	21	24	1	23	55052	45786	9266	45786	9266	0	MT-RNR2	rRNA	0	0	1	0
1718	55813	0	A	55779	T	22	3	19	0.04	55779	46279	9500	7	1	6	5	5	0	22	3	19	46279	9500	0	MT-RNR2	rRNA	0	0	1	1
1719	56883	0	G	56720	T	142	105	37	0.25	8	6	2	13	11	2	56720	46935	9785	142	105	37	46935	9785	0	MT-RNR2	rRNA	0	0	1	0
1720	57010	0	C	56975	A	22	15	7	0.04	22	15	7	56975	47178	9797	2	1	1	11	6	5	47178	9797	0	MT-RNR2	rRNA	0	0	1	0
1721	57222	0	C	57161	T	34	8	26	0.06	24	22	2	57161	47399	9762	3	2	1	34	8	26	47399	9762	0	MT-RNR2	rRNA	0	0	1	0
1722	58521	1	A	58502	G	14	11	3	0.02	58502	48543	9959	4	3	1	14	11	3	1	1	0	48543	9959	0	MT-RNR2	rRNA	0	0	1	1
1723	58754	0	A	58737	G	8	7	1	0.01	58737	48677	10060	6	4	2	8	7	1	3	2	1	48677	10060	0	MT-RNR2	rRNA	0	0	1	1
1724	58645	0	A	58629	G	8	7	1	0.01	58629	48737	9892	2	2	0	8	7	1	6	1	5	48737	9892	0	MT-RNR2	rRNA	0	0	1	1
1725	59057	0	C	59026	T	15	12	3	0.03	12	9	3	59026	48765	10261	4	4	0	15	12	3	48765	10261	0	MT-RNR2	rRNA	0	0	1	1
1726	59638	2	C	59605	A	30	22	8	0.05	30	22	8	59605	49358	10247	0	0	0	3	2	1	49358	10247	0	MT-RNR2	rRNA	0	0	1	0
1727	60841	0	A	60825	G	12	9	3	0.02	60825	49935	10890	2	2	0	12	9	3	2	1	1	49935	10890	0	MT-RNR2	rRNA	0	0	1	1
1728	61394	1	T	61377	A	11	8	3	0.02	11	8	3	5	4	1	1	1	0	61377	50065	11312	50065	11312	0	MT-RNR2	rRNA	0	0	1	1
1729	61478	0	T	61469	A	5	4	1	0.01	5	4	1	4	3	1	0	0	0	61469	50078	11391	50078	11391	0	MT-RNR2	rRNA	0	0	1	1
1730	61978	1	T	61959	C	15	7	8	0.02	3	3	0	15	7	8	1	1	0	61959	50142	11817	50142	11817	0	MT-RNR2	rRNA	0	0	1	0
1731	62061	0	A	62035	T	17	8	9	0.03	62035	49912	12123	5	4	1	4	3	1	17	8	9	49912	12123	0	MT-RNR2	rRNA	0	0	1	0
1732	66711	0	C	66662	A	22	15	7	0.03	22	15	7	66662	51104	15558	11	2	9	16	13	3	51104	15558	0	MT-RNR2	rRNA	0	0	1	0
1733	66733	0	C	66665	A	45	34	11	0.07	45	34	11	66665	51085	15580	5	1	4	18	14	4	51085	15580	0	MT-RNR2	rRNA	0	0	1	0
1734	67507	0	C	67411	A	56	44	12	0.08	56	44	12	67411	51203	16208	10	5	5	30	20	10	51203	16208	0	MT-RNR2	rRNA	0	0	1	0
1735	67763	0	A	67733	G	12	4	8	0.02	67733	51306	16427	8	1	7	12	4	8	10	4	6	51306	16427	0	MT-RNR2	rRNA	0	0	1	1
1736	67950	1	G	67893	T	44	26	18	0.06	3	1	2	10	2	8	67893	51422	16471	44	26	18	51422	16471	0	MT-RNR2	rRNA	0	0	1	0
1737	68610	0	A	68565	T	25	16	9	0.04	68565	51966	16599	7	3	4	13	9	4	25	16	9	51966	16599	0	MT-RNR2	rRNA	0	0	1	0
1738	71143	0	T	71112	C	13	10	3	0.02	10	3	7	13	10	3	8	5	3	71112	52089	19023	52089	19023	0	MT-RNR2	rRNA	0	0	1	1
1739	72158	1	A	72142	G	9	3	6	0.01	72142	52374	19768	2	1	1	9	3	6	5	1	4	52374	19768	0	MT-RNR2	rRNA	0	0	1	1
1740	72278	7	A	72257	G	9	4	5	0.01	72257	52349	19908	5	2	3	9	4	5	7	5	2	52349	19908	0	MT-RNR2	rRNA	0	0	1	1
1741	72832	0	A	72800	G	20	14	6	0.03	72800	52219	20581	3	1	2	20	14	6	9	5	4	52219	20581	0	MT-RNR2	rRNA	0	0	1	0
1742	73891	0	G	73863	T	12	9	3	0.02	6	2	4	10	7	3	73863	52352	21511	12	9	3	52352	21511	0	MT-RNR2	rRNA	0	0	1	1
1743	73612	2	T	73602	G	4	2	2	0.01	3	1	2	3	2	1	4	2	2	73602	51808	21794	51808	21794	0	MT-RNR2	rRNA	0	0	1	1
1744	74653	0	A	74616	G	16	10	6	0.02	74616	52395	22221	9	1	8	16	10	6	12	8	4	52395	22221	0	MT-RNR2	rRNA	0	0	1	0
1745	74754	0	T	74741	C	11	8	3	0.01	2	1	1	11	8	3	0	0	0	74741	52441	22300	52441	22300	0	MT-RNR2	rRNA	0	0	1	1
1746	75118	0	A	75086	T	14	10	4	0.02	75086	52646	22440	6	4	2	12	9	3	14	10	4	52646	22440	0	MT-RNR2	rRNA	0	0	1	1
1747	75321	0	G	75283	T	29	18	11	0.04	6	3	3	3	3	0	75283	52789	22494	29	18	11	52789	22494	0	MT-RNR2	rRNA	0	0	1	0
1748	75425	0	G	75388	T	30	24	6	0.04	3	1	2	4	1	3	75388	52954	22434	30	24	6	52954	22434	0	MT-RNR2	rRNA	0	0	1	0
1749	75625	0	C	75572	A	29	21	8	0.04	29	21	8	75572	53038	22534	4	4	0	20	10	10	53038	22534	0	MT-RNR2	rRNA	0	0	1	0
1750	75966	0	G	75916	T	32	23	9	0.04	9	7	2	9	3	6	75916	53089	22827	32	23	9	53089	22827	0	MT-RNR2	rRNA	0	0	1	0
1751	76753	0	A	76717	T	16	3	13	0.02	76717	52890	23827	14	8	6	6	2	4	16	3	13	52890	23827	0	MT-RNR2	rRNA	0	0	1	1
1752	78548	2	T	78522	C	16	10	6	0.02	3	2	1	16	10	6	7	1	6	78522	53872	24650	53872	24650	0	MT-RNR2	rRNA	0	0	1	0
1753	79475	0	A	79449	G	12	7	5	0.02	79449	54171	25278	5	2	3	12	7	5	9	3	6	54171	25278	0	MT-RNR2	rRNA	0	0	1	0
1754	79856	0	G	79802	T	38	30	8	0.05	8	4	4	8	4	4	79802	54374	25428	38	30	8	54374	25428	0	MT-RNR2	rRNA	0	0	1	0
1755	80225	0	A	80180	G	25	17	8	0.03	80180	54305	25875	9	1	8	25	17	8	11	5	6	54305	25875	0	MT-RNR2	rRNA	0	0	1	0
1756	80459	0	A	80433	T	15	4	11	0.02	80433	54488	25945	7	3	4	4	4	0	15	4	11	54488	25945	0	MT-RNR2	rRNA	0	0	1	1
1757	81178	0	A	81160	T	8	3	5	0.01	81160	55205	25955	5	2	3	5	2	3	8	3	5	55205	25955	0	MT-RNR2	rRNA	0	0	1	1
1758	81542	0	T	81527	C	6	4	2	0.01	5	4	1	6	4	2	4	0	4	81527	55632	25895	55632	25895	0	MT-RNR2	rRNA	0	0	1	1
1759	82037	0	T	82016	C	16	9	7	0.02	2	0	2	16	9	7	3	2	1	82016	55997	26019	55997	26019	0	MT-RNR2	rRNA	0	0	1	0
1760	82296	0	G	82245	T	25	18	7	0.03	18	14	4	8	7	1	82245	56157	26088	25	18	7	56157	26088	0	MT-RNR2	rRNA	0	0	1	0
1761	82290	0	A	82268	G	19	14	5	0.02	82268	56152	26116	1	1	0	19	14	5	2	2	0	56152	26116	0	MT-RNR2	rRNA	0	0	1	0
1762	82180	0	A	82170	G	5	4	1	0.01	82170	56178	25992	2	1	1	5	4	1	3	3	0	56178	25992	0	MT-RNR2	rRNA	0	0	1	1
1763	80937	0	A	80888	G	38	26	12	0.05	80888	56164	24724	4	4	0	38	26	12	7	3	4	56164	24724	0	MT-RNR2	rRNA	0	0	1	0
1764	82349	0	C	82295	A	34	19	15	0.04	34	19	15	82295	56011	26284	3	2	1	17	12	5	56011	26284	0	MT-RNR2	rRNA	0	0	1	0
1765	82641	0	C	82580	A	44	28	16	0.05	44	28	16	82580	56291	26289	3	3	0	14	9	5	56291	26289	0	MT-RNR2	rRNA	0	0	1	0
1766	82690	2	T	82639	C	35	8	27	0.04	11	2	9	35	8	27	5	2	3	82639	56117	26522	56117	26522	0	MT-RNR2	rRNA	0	0	1	0
1767	82785	2	G	82681	T	81	59	22	0.1	19	10	9	4	3	1	82681	56002	26679	81	59	22	56002	26679	0	MT-RNR2	rRNA	0	0	1	0
1768	82832	0	G	82767	T	42	32	10	0.05	16	8	8	7	4	3	82767	56167	26600	42	32	10	56167	26600	0	MT-RNR2	rRNA	0	0	1	0
1769	82802	0	C	82708	A	52	29	23	0.06	52	29	23	82708	56252	26456	15	8	7	27	19	8	56252	26456	0	MT-RNR2	rRNA	0	0	1	0
1770	83048	0	G	82967	T	41	30	11	0.05	24	9	15	16	12	4	82967	56458	26509	41	30	11	56458	26509	0	MT-RNR2	rRNA	0	0	1	0
1771	83324	0	C	83265	A	44	25	19	0.05	44	25	19	83265	56526	26739	5	0	5	10	7	3	56526	26739	0	MT-RNR2	rRNA	0	0	1	0
1772	83302	1	A	83283	G	13	3	10	0.02	83283	56415	26868	1	1	0	13	3	10	5	3	2	56415	26868	0	MT-RNR2	rRNA	0	0	1	1
1773	83184	0	A	83167	C	8	8	0	0.01	83167	56179	26988	8	8	0	2	1	1	7	4	3	56179	26988	0	MT-RNR2	rRNA	0	0	1	1
1774	83392	1	T	83379	C	10	6	4	0.01	2	0	2	10	6	4	1	0	1	83379	56400	26979	56400	26979	0	MT-RNR2	rRNA	0	0	1	1
1775	83979	0	A	83944	G	15	12	3	0.02	83944	56930	27014	6	1	5	15	12	3	14	11	3	56930	27014	0	MT-RNR2	rRNA	0	0	1	1
1776	84428	0	G	84391	T	25	16	9	0.03	2	2	0	10	4	6	84391	57212	27179	25	16	9	57212	27179	0	MT-RNR2	rRNA	0	0	1	0
1777	84471	1	A	84445	G	14	12	2	0.02	84445	57304	27141	3	3	0	14	12	2	9	5	4	57304	27141	0	MT-RNR2	rRNA	0	0	1	1
1778	84447	2	T	84393	G	28	20	8	0.03	14	14	0	12	8	4	28	20	8	84393	57279	27114	57279	27114	0	MT-RNR2	rRNA	0	0	1	0
1779	85046	0	A	85028	G	10	8	2	0.01	85028	57769	27259	4	4	0	10	8	2	4	3	1	57769	27259	0	MT-RNR2	rRNA	0	0	1	1
1780	85360	0	T	85312	G	24	21	3	0.03	18	15	3	6	4	2	24	21	3	85312	57799	27513	57799	27513	0	MT-RNR2	rRNA	0	0	1	1
1781	86061	0	A	86005	G	26	21	5	0.03	86005	58211	27794	10	9	1	26	21	5	20	15	5	58211	27794	0	MT-RNR2	rRNA	0	0	1	0
1782	86301	0	G	86210	A	43	39	4	0.05	43	39	4	10	6	4	86210	57966	28244	38	27	11	57966	28244	0	MT-RNR2	rRNA	0	0	1	1
1783	76424	1	T	76363	C	41	22	19	0.05	9	7	2	41	22	19	11	9	2	76363	47867	28496	47867	28496	0	MT-RNR2	rRNA	0	0	1	0
1784	76642	2	A	76588	T	22	10	12	0.03	76588	47996	28592	17	11	6	15	14	1	22	10	12	47996	28592	0	MT-RNR2	rRNA	0	0	1	0
1785	73610	0	C	73557	A	24	13	11	0.03	24	13	11	73557	44347	29210	7	7	0	22	11	11	44347	29210	0	MT-RNR2	rRNA	0	0	1	0
1786	73889	0	C	73789	A	69	41	28	0.09	69	41	28	73789	44325	29464	5	3	2	26	14	12	44325	29464	0	MT-RNR2	rRNA	0	0	1	0
1787	74972	0	G	74877	T	45	29	16	0.06	30	20	10	20	8	12	74877	43919	30958	45	29	16	43919	30958	0	MT-RNR2	rRNA	0	0	1	0
1788	71434	0	C	71301	A	94	66	28	0.13	94	66	28	71301	40237	31064	17	8	9	22	11	11	40237	31064	0	MT-RNR2	rRNA	0	0	1	0
1789	69341	1	A	69230	G	87	42	45	0.13	69230	37917	31313	7	1	6	87	42	45	17	4	13	37917	31313	0	MT-RNR2	rRNA	0	0	1	0
1790	68569	0	A	68530	T	21	6	15	0.03	68530	37100	31430	7	1	6	11	8	3	21	6	15	37100	31430	0	MT-RNR2	rRNA	0	0	1	0
1791	68818	0	G	68733	T	56	36	20	0.08	17	8	9	12	2	10	68733	37238	31495	56	36	20	37238	31495	0	MT-RNR2	rRNA	0	0	1	0
1792	69571	18	G	69479	T	45	22	23	0.06	29	26	3	18	17	1	69479	38051	31428	45	22	23	38051	31428	0	MT-RNR2	rRNA	0	0	1	0
1793	64985	1	G	64855	T	99	54	45	0.15	19	14	5	12	6	6	64855	33738	31117	99	54	45	33738	31117	0	MT-RNR2	rRNA	0	0	1	0
1794	65186	0	A	65143	G	32	22	10	0.05	65143	33341	31802	7	2	5	32	22	10	4	1	3	33341	31802	0	MT-RNR2	rRNA	0	0	1	0
1795	65869	0	A	65838	G	16	3	13	0.02	65838	33028	32810	6	1	5	16	3	13	9	5	4	33028	32810	0	MT-RNR2	rRNA	0	0	1	1
1796	64807	0	A	64774	C	14	3	11	0.02	64774	31852	32922	14	3	11	7	5	2	12	10	2	31852	32922	0	MT-RNR2	rRNA	0	0	1	1
1797	64758	0	G	64713	T	33	13	20	0.05	6	4	2	6	5	1	64713	31833	32880	33	13	20	31833	32880	0	MT-RNR2	rRNA	0	0	1	0
1798	63981	0	A	63961	G	10	7	3	0.02	63961	31201	32760	8	2	6	10	7	3	2	1	1	31201	32760	0	MT-RNR2	rRNA	0	0	1	1
1799	62880	2	T	62851	C	16	6	10	0.03	10	8	2	16	6	10	3	1	2	62851	29881	32970	29881	32970	0	MT-RNR2	rRNA	0	0	1	0
1800	65674	6	G	65606	T	50	13	37	0.08	8	2	6	10	0	10	65606	31091	34515	50	13	37	31091	34515	2	MT-RNR2	rRNA	1	0	1	0
1801	67020	25	A	66980	G	24	9	15	0.04	66980	32321	34659	5	0	5	24	9	15	11	4	7	32321	34659	2	MT-RNR2	rRNA	1	0	1	0
1802	67620	0	A	67585	G	29	10	19	0.04	67585	32658	34927	1	0	1	29	10	19	5	1	4	32658	34927	5	MT-RNR2	rRNA	1	0	1	0
1803	67116	0	A	67094	G	14	5	9	0.02	67094	32174	34920	3	2	1	14	5	9	5	2	3	32174	34920	4	MT-RNR2	rRNA	1	0	1	0
1804	66792	0	A	66776	T	7	4	3	0.01	66776	31769	35007	4	0	4	5	4	1	7	4	3	31769	35007	3	MT-RNR2	rRNA	1	0	1	1
1805	67377	0	A	67359	T	7	2	5	0.01	67359	31670	35689	4	2	2	7	4	3	7	2	5	31670	35689	1	MT-RNR2	rRNA	1	0	1	1
1806	67788	1	T	67760	A	13	8	5	0.02	13	8	5	12	10	2	3	1	2	67760	31615	36145	31615	36145	1	MT-RNR2	rRNA	1	0	1	0
1807	68659	0	T	68633	A	19	10	9	0.03	19	10	9	5	1	4	2	1	1	68633	31329	37304	31329	37304	0	MT-RNR2	rRNA	0	0	1	0
1808	67394	1	A	67374	T	9	6	3	0.01	67374	30044	37330	2	1	1	9	5	4	9	6	3	30044	37330	0	MT-RNR2	rRNA	0	0	1	1
1809	65708	4	T	65689	C	9	4	5	0.01	8	3	5	9	4	5	2	1	1	65689	28416	37273	28416	37273	0	MT-RNR2	rRNA	0	0	1	1
1810	65460	0	A	65450	G	8	4	4	0.01	65450	28241	37209	1	0	1	8	4	4	1	0	1	28241	37209	0	MT-RNR2	rRNA	0	0	1	1
1811	64900	0	A	64878	G	15	8	7	0.02	64878	27396	37482	3	2	1	15	8	7	4	3	1	27396	37482	0	MT-RNR2	rRNA	0	0	1	0
1812	64676	0	C	64633	A	23	8	15	0.04	23	8	15	64633	27100	37533	4	2	2	16	5	11	27100	37533	0	MT-RNR2	rRNA	0	0	1	0
1813	64587	1	C	64530	A	37	18	19	0.06	37	18	19	64530	27054	37476	1	1	0	19	9	10	27054	37476	0	MT-RNR2	rRNA	0	0	1	0
1814	67662	1	A	67599	G	43	7	36	0.06	67599	26963	40636	16	1	15	43	7	36	4	0	4	26963	40636	0	MT-RNR2	rRNA	0	0	1	0
1815	64738	0	A	64678	G	34	1	33	0.05	64678	23905	40773	5	1	4	34	1	33	21	2	19	23905	40773	0	MT-RNR2	rRNA	0	0	1	1
1816	65957	0	G	65861	T	53	20	33	0.08	29	9	20	14	5	9	65861	24120	41741	53	20	33	24120	41741	0	MT-RNR2	rRNA	0	0	1	0
1817	60892	19	C	60802	A	47	29	18	0.08	47	29	18	60802	24039	36763	30	26	4	13	4	9	24039	36763	0	MT-RNR2	rRNA	0	0	1	0
1818	60438	0	A	60172	G	254	21	233	0.42	60172	23750	36422	4	2	2	254	21	233	8	4	4	23750	36422	0	MT-RNR2	rRNA	0	0	1	0
1819	60716	0	T	60677	C	21	8	13	0.03	14	9	5	21	8	13	4	1	3	60677	22974	37703	22974	37703	0	MT-RNR2	rRNA	0	0	1	0
1820	60830	1	A	60792	C	24	19	5	0.04	60792	22806	37986	24	19	5	6	3	3	8	5	3	22806	37986	0	MT-RNR2	rRNA	0	0	1	0
1821	60780	2	A	60765	T	6	1	5	0.01	60765	22618	38147	4	0	4	5	4	1	6	1	5	22618	38147	0	MT-RNR2	rRNA	0	0	1	1
1822	59362	0	T	59325	A	16	2	14	0.03	16	2	14	8	2	6	13	1	12	59325	21466	37859	21466	37859	0	MT-RNR2	rRNA	0	0	1	1
1823	59458	19	A	59445	G	8	3	5	0.01	59445	21434	38011	2	2	0	8	3	5	3	1	2	21434	38011	0	MT-RNR2	rRNA	0	0	1	1
1824	59189	0	T	59171	C	11	4	7	0.02	1	0	1	11	4	7	6	1	5	59171	21322	37849	21322	37849	0	MT-RNR2	rRNA	0	0	1	1
1825	59339	0	A	59317	G	11	3	8	0.02	59317	21367	37950	8	2	6	11	3	8	3	1	2	21367	37950	0	MT-RNR2	rRNA	0	0	1	1
1826	59548	0	G	59494	T	38	15	23	0.06	7	4	3	9	4	5	59494	21555	37939	38	15	23	21555	37939	0	MT-RNR2	rRNA	0	0	1	0
1827	59536	0	C	59488	A	37	13	24	0.06	37	13	24	59488	22240	37248	3	1	2	8	2	6	22240	37248	0	MT-RNR2	rRNA	0	0	1	0
1828	59676	0	A	59639	G	29	5	24	0.05	59639	22529	37110	4	1	3	29	5	24	4	0	4	22529	37110	0	MT-RNR2	rRNA	0	0	1	0
1829	59660	0	A	59630	G	19	3	16	0.03	59630	22576	37054	4	2	2	19	3	16	7	2	5	22576	37054	0	MT-RNR2	rRNA	0	0	1	1
1830	59462	0	G	59409	T	39	15	24	0.07	9	6	3	5	4	1	59409	22646	36763	39	15	24	22646	36763	0	MT-RNR2	rRNA	0	0	1	0
1831	59070	3	G	59007	A	29	7	22	0.05	29	7	22	8	4	4	59007	22526	36481	26	14	12	22526	36481	0	MT-RNR2	rRNA	0	0	1	0
1832	54495	0	A	54472	G	16	3	13	0.03	54472	21397	33075	4	0	4	16	3	13	3	0	3	21397	33075	0	MT-RNR2	rRNA	0	0	1	1
1833	55441	1	C	55377	A	30	9	21	0.05	30	9	21	55377	21834	33543	22	7	15	12	3	9	21834	33543	0	MT-RNR2	rRNA	0	0	1	0
1834	54817	0	T	54729	A	46	8	38	0.08	46	8	38	14	5	9	28	1	27	54729	21758	32971	21758	32971	0	MT-RNR2	rRNA	0	0	1	0
1835	54633	0	A	54604	G	21	8	13	0.04	54604	21867	32737	2	1	1	21	8	13	6	5	1	21867	32737	0	MT-RNR2	rRNA	0	0	1	0
1836	53207	0	A	53191	G	7	5	2	0.01	53191	21765	31426	5	4	1	7	5	2	4	1	3	21765	31426	2	MT-RNR2	rRNA	1	0	1	1
1837	54143	0	C	54105	A	22	5	17	0.04	22	5	17	54105	21285	32820	4	2	2	12	6	6	21285	32820	6	MT-RNR2	rRNA	1	0	1	0
1838	51772	0	C	51724	A	30	13	17	0.06	30	13	17	51724	21191	30533	2	1	1	16	5	11	21191	30533	5	MT-RNR2	rRNA	1	0	1	0
1839	51552	0	C	51501	A	37	10	27	0.07	37	10	27	51501	21380	30121	2	1	1	12	7	5	21380	30121	4	MT-RNR2	rRNA	1	0	1	0
1840	53430	6	C	53333	G	51	2	49	0.1	32	9	23	53333	21563	31770	51	2	49	14	3	11	21563	31770	3	MT-RNR2	rRNA	1	0	1	1
1841	52903	0	T	52163	G	359	4	355	0.68	315	8	307	66	6	60	359	4	355	52163	21725	30438	21725	30438	1	MT-RNR2	rRNA	1	0	1	1
1842	53215	0	A	53114	G	67	2	65	0.13	53114	21764	31350	9	2	7	67	2	65	25	4	21	21764	31350	0	MT-RNR2	rRNA	0	0	1	1
1843	53600	0	T	53519	A	40	3	37	0.07	40	3	37	22	6	16	19	3	16	53519	21735	31784	21735	31784	0	MT-RNR2	rRNA	0	0	1	1
1844	52104	0	A	52034	G	41	20	21	0.08	52034	21646	30388	25	0	25	41	20	21	4	3	1	21646	30388	0	MT-RNR2	rRNA	0	0	1	0
1845	55231	0	C	55179	T	30	4	26	0.05	15	4	11	55179	21627	33552	7	2	5	30	4	26	21627	33552	0	MT-RNR2	rRNA	0	0	1	1
1846	55514	0	C	55469	A	29	12	17	0.05	29	12	17	55469	22017	33452	5	2	3	11	4	7	22017	33452	0	MT-RNR2	rRNA	0	0	1	0
1847	55493	3	T	55462	C	19	5	14	0.03	8	1	7	19	5	14	4	2	2	55462	22022	33440	22022	33440	0	MT-RNR2	rRNA	0	0	1	0
1848	55230	0	T	55154	C	72	5	67	0.13	2	0	2	72	5	67	2	0	2	55154	21867	33287	21867	33287	0	MT-RNR2	rRNA	0	0	1	0
1849	55576	0	C	55537	A	21	7	14	0.04	21	7	14	55537	21946	33591	3	1	2	15	4	11	21946	33591	0	MT-RNR2	rRNA	0	0	1	0
1850	56693	1	T	56638	C	34	4	30	0.06	9	3	6	34	4	30	12	3	9	56638	22080	34558	22080	34558	0	MT-RNR2	rRNA	0	0	1	1
1851	55903	0	G	55846	T	24	16	8	0.04	21	13	8	12	3	9	55846	22161	33685	24	16	8	22161	33685	0	MT-RNR2	rRNA	0	0	1	0
1852	54099	6	C	54041	A	24	12	12	0.04	24	12	12	54041	21103	32938	13	9	4	21	8	13	21103	32938	0	MT-RNR2	rRNA	0	0	1	0
1853	53376	4	A	53323	G	42	2	40	0.08	53323	20925	32398	8	3	5	42	2	40	3	1	2	20925	32398	0	MT-RNR2	rRNA	0	0	1	1
1854	53210	0	T	53070	A	100	4	96	0.19	100	4	96	14	3	11	26	3	23	53070	20828	32242	20828	32242	0	MT-RNR2	rRNA	0	0	1	1
1855	52992	0	A	52954	G	27	4	23	0.05	52954	21012	31942	6	5	1	27	4	23	5	0	5	21012	31942	0	MT-RNR2	rRNA	0	0	1	1
1856	53014	2	A	52992	G	11	9	2	0.02	52992	21022	31970	5	1	4	11	9	2	6	4	2	21022	31970	0	MT-RNR2	rRNA	0	0	1	1
1857	52326	0	T	52300	A	10	3	7	0.02	10	3	7	10	6	4	6	3	3	52300	20422	31878	20422	31878	0	MT-RNR2	rRNA	0	0	1	1
1858	51932	1	G	51859	A	41	18	23	0.08	41	18	23	7	5	2	51859	20021	31838	25	15	10	20021	31838	0	MT-RNR2	rRNA	0	0	1	0
1859	51849	0	A	51836	G	8	4	4	0.02	51836	19915	31921	3	0	3	8	4	4	2	0	2	19915	31921	0	MT-RNR2	rRNA	0	0	1	1
1860	52425	0	A	52415	G	7	5	2	0.01	52415	20304	32111	0	0	0	7	5	2	3	1	2	20304	32111	0	MT-RNR2	rRNA	0	0	1	1
1861	52392	0	T	52378	C	8	3	5	0.02	4	2	2	8	3	5	2	0	2	52378	20321	32057	20321	32057	0	MT-RNR2	rRNA	0	0	1	1
1862	52362	0	T	52352	C	7	4	3	0.01	3	1	2	7	4	3	0	0	0	52352	20347	32005	20347	32005	0	MT-RNR2	rRNA	0	0	1	1
1863	52393	0	A	52379	T	8	3	5	0.02	52379	20334	32045	2	1	1	4	1	3	8	3	5	20334	32045	0	MT-RNR2	rRNA	0	0	1	1
1864	52499	0	A	52480	G	11	4	7	0.02	52480	20408	32072	4	3	1	11	4	7	4	2	2	20408	32072	0	MT-RNR2	rRNA	0	0	1	1
1865	53605	0	C	53578	A	14	7	7	0.03	14	7	7	53578	21191	32387	0	0	0	13	4	9	21191	32387	0	MT-RNR2	rRNA	0	0	1	0
1866	53407	0	T	53387	C	12	4	8	0.02	5	1	4	12	4	8	3	0	3	53387	21272	32115	21272	32115	0	MT-RNR2	rRNA	0	0	1	1
1867	53745	0	A	53724	G	13	3	10	0.02	53724	21253	32471	3	0	3	13	3	10	5	0	5	21253	32471	0	MT-RNR2	rRNA	0	0	1	1
1868	53837	0	G	53804	T	23	10	13	0.04	6	2	4	4	0	4	53804	21308	32496	23	10	13	21308	32496	0	MT-RNR2	rRNA	0	0	1	0
1869	54516	0	A	54491	G	15	7	8	0.03	54491	21655	32836	3	1	2	15	7	8	7	1	6	21655	32836	0	MT-RNR2	rRNA	0	0	1	0
1870	55093	0	A	55046	G	36	11	25	0.07	55046	21761	33285	4	0	4	36	11	25	7	2	5	21761	33285	0	MT-RNR2	rRNA	0	0	1	0
1871	54892	1	A	54859	G	24	2	22	0.04	54859	21817	33042	3	1	2	24	2	22	6	1	5	21817	33042	0	MT-RNR2	rRNA	0	0	1	1
1872	55170	0	T	55151	C	9	1	8	0.02	6	1	5	9	1	8	4	4	0	55151	21853	33298	21853	33298	0	MT-RNR2	rRNA	0	0	1	1
1873	55327	3	A	55308	C	10	3	7	0.02	55308	21964	33344	10	3	7	7	3	4	2	1	1	21964	33344	0	MT-RNR2	rRNA	0	0	1	1
1874	54939	0	A	54913	T	14	5	9	0.03	54913	21821	33092	2	1	1	10	2	8	14	5	9	21821	33092	0	MT-RNR2	rRNA	0	0	1	0
1875	55778	0	C	55746	T	18	8	10	0.03	12	5	7	55746	21922	33824	2	1	1	18	8	10	21922	33824	0	MT-RNR2	rRNA	0	0	1	0
1876	55519	1	T	55483	C	31	10	21	0.06	3	3	0	31	10	21	2	2	0	55483	21958	33525	21958	33525	0	MT-RNR2	rRNA	0	0	1	0
1877	55241	0	T	55226	C	8	3	5	0.01	1	0	1	8	3	5	6	2	4	55226	21724	33502	21724	33502	0	MT-RNR2	rRNA	0	0	1	1
1878	54873	0	T	54854	C	14	7	7	0.03	1	1	0	14	7	7	4	1	3	54854	21717	33137	21717	33137	0	MT-RNR2	rRNA	0	0	1	0
1879	55402	1	G	55368	T	21	9	12	0.04	5	4	1	8	4	4	55368	21752	33616	21	9	12	21752	33616	0	MT-RNR2	rRNA	0	0	1	0
1880	55198	0	C	55155	A	30	12	18	0.05	30	12	18	55155	21854	33301	7	3	4	6	1	5	21854	33301	0	MT-RNR2	rRNA	0	0	1	0
1881	55023	0	A	54988	G	32	14	18	0.06	54988	21692	33296	1	0	1	32	14	18	2	1	1	21692	33296	0	MT-RNR2	rRNA	0	0	1	0
1882	54136	0	A	54117	G	8	0	8	0.01	54117	21403	32714	7	2	5	8	0	8	4	2	2	21403	32714	0	MT-RNR2	rRNA	0	0	1	1
1883	54072	1	G	54029	T	28	20	8	0.05	2	2	0	13	6	7	54029	21571	32458	28	20	8	21571	32458	0	MT-RNR2	rRNA	0	0	1	0
1884	53794	0	G	53718	A	39	9	30	0.07	39	9	30	13	5	8	53718	21657	32061	24	13	11	21657	32061	0	MT-RNR2	rRNA	0	0	1	0
1885	52263	0	A	52173	G	62	13	49	0.12	52173	20450	31723	17	2	15	62	13	49	11	3	8	20450	31723	0	MT-RNR2	rRNA	0	0	1	0
1886	51246	0	G	51180	A	32	9	23	0.06	32	9	23	8	5	3	51180	19582	31598	26	9	17	19582	31598	0	MT-RNR2	rRNA	0	0	1	0
1887	49569	0	A	49496	G	50	5	45	0.1	49496	19227	30269	8	1	7	50	5	45	15	0	15	19227	30269	0	MT-RNR2	rRNA	0	0	1	0
1888	50617	0	G	50544	T	33	18	15	0.07	22	4	18	18	2	16	50544	20361	30183	33	18	15	20361	30183	0	MT-RNR2	rRNA	0	0	1	0
1889	50850	1	C	50765	A	54	31	23	0.11	54	31	23	50765	20568	30197	17	3	14	14	4	10	20568	30197	0	MT-RNR2	rRNA	0	0	1	0
1890	51393	0	C	51305	A	34	12	22	0.07	34	12	22	51305	21346	29959	28	5	23	26	18	8	21346	29959	0	MT-RNR2	rRNA	0	0	1	0
1891	51761	6	A	51697	G	36	4	32	0.07	51697	21342	30355	19	14	5	36	4	32	9	2	7	21342	30355	0	MT-RNR2	rRNA	0	0	1	1
1892	50768	0	A	50732	G	21	10	11	0.04	50732	20468	30264	1	0	1	21	10	11	14	2	12	20468	30264	0	MT-RNR2	rRNA	0	0	1	0
1893	50129	0	A	50097	C	14	1	13	0.03	50097	19560	30537	14	1	13	13	6	7	5	0	5	19560	30537	0	MT-RNR2	rRNA	0	0	1	1
1894	49896	0	G	49840	T	36	11	25	0.07	11	6	5	9	4	5	49840	19625	30215	36	11	25	19625	30215	0	MT-RNR2	rRNA	0	0	1	0
1895	49949	0	C	49893	A	36	29	7	0.07	36	29	7	49893	20624	29269	6	5	1	14	6	8	20624	29269	0	MT-RNR2	rRNA	0	0	1	0
1896	49797	0	T	49748	G	31	23	8	0.06	11	4	7	7	3	4	31	23	8	49748	20668	29080	20668	29080	0	MT-RNR2	rRNA	0	0	1	0
1897	50253	0	A	50224	C	14	4	10	0.03	50224	20749	29475	14	4	10	9	4	5	6	4	2	20749	29475	0	MT-RNR2	rRNA	0	0	1	1
1898	50086	1	A	50034	T	24	24	0	0.05	50034	20679	29355	18	5	13	10	3	7	24	24	0	20679	29355	0	MT-RNR2	rRNA	0	0	1	1
1899	48703	0	G	48656	C	21	20	1	0.04	12	9	3	21	20	1	48656	20635	28021	14	7	7	20635	28021	0	MT-RNR2	rRNA	0	0	1	1
1900	42280	1	A	42255	G	20	14	6	0.05	42255	19376	22879	3	1	2	20	14	6	2	2	0	19376	22879	2	MT-RNR2	rRNA	1	0	1	0
1901	47006	2	C	46952	A	25	5	20	0.05	25	5	20	46952	18065	28887	7	4	3	22	6	16	18065	28887	2	MT-RNR2	rRNA	1	0	1	0
1902	46794	2	C	46729	A	34	16	18	0.07	34	16	18	46729	17802	28927	2	1	1	29	5	24	17802	28927	5	MT-RNR2	rRNA	1	0	1	0
1903	47646	0	C	47574	T	36	6	30	0.08	29	11	18	47574	18332	29242	7	3	4	36	6	30	18332	29242	4	MT-RNR2	rRNA	1	0	1	0
1904	49055	0	C	48931	A	53	11	42	0.11	53	11	42	48931	19886	29045	40	2	38	31	7	24	19886	29045	3	MT-RNR2	rRNA	1	0	1	0
1905	49351	0	C	49168	G	84	2	82	0.17	67	21	46	49168	20771	28397	84	2	82	32	15	17	20771	28397	1	MT-RNR2	rRNA	1	0	1	1
1906	49223	0	G	49039	A	89	7	82	0.18	89	7	82	29	3	26	49039	20573	28466	66	16	50	20573	28466	1	MT-RNR2	rRNA	1	0	1	0
1907	48273	0	A	48151	G	109	28	81	0.23	48151	20356	27795	6	3	3	109	28	81	7	1	6	20356	27795	0	MT-RNR2	rRNA	0	0	1	0
1908	48186	1	A	48120	G	50	17	33	0.1	48120	20495	27625	6	3	3	50	17	33	10	2	8	20495	27625	0	MT-RNR2	rRNA	0	0	1	0
1909	46077	0	A	46041	T	13	3	10	0.03	46041	20559	25482	11	4	7	12	4	8	13	3	10	20559	25482	0	MT-RNR2	rRNA	0	0	1	1
1910	48711	0	C	48666	T	25	13	12	0.05	14	4	10	48666	20544	28122	6	3	3	25	13	12	20544	28122	0	MT-RNR2	rRNA	0	0	1	0
1911	48275	0	C	48224	A	28	12	16	0.06	28	12	16	48224	20768	27456	3	2	1	20	4	16	20768	27456	0	MT-RNR2	rRNA	0	0	1	0
1912	50069	0	A	50030	G	29	15	14	0.06	50030	21928	28102	4	3	1	29	15	14	6	3	3	21928	28102	0	MT-RNR2	rRNA	0	0	1	0
1913	50217	0	G	50178	T	23	13	10	0.05	14	1	13	2	0	2	50178	22059	28119	23	13	10	22059	28119	0	MT-RNR2	rRNA	0	0	1	0
1914	46207	0	A	46146	G	38	3	35	0.08	46146	22073	24073	21	4	17	38	3	35	2	0	2	22073	24073	0	MT-RNR2	rRNA	0	0	1	1
1915	46951	3	C	46871	A	38	13	25	0.08	38	13	25	46871	22259	24612	28	9	19	14	3	11	22259	24612	0	MT-RNR2	rRNA	0	0	1	0
1916	46071	0	G	46009	A	29	8	21	0.06	29	8	21	4	2	2	46009	22031	23978	29	15	14	22031	23978	0	MT-RNR2	rRNA	0	0	1	0
1917	45823	0	A	45800	G	14	3	11	0.03	45800	21899	23901	1	0	1	14	3	11	8	4	4	21899	23901	0	MT-RNR2	rRNA	0	0	1	1
1918	45952	0	G	45909	T	23	13	10	0.05	10	2	8	10	3	7	45909	22034	23875	23	13	10	22034	23875	0	MT-RNR2	rRNA	0	0	1	0
1919	45143	0	C	45095	A	37	24	13	0.08	37	24	13	45095	22182	22913	2	0	2	9	5	4	22182	22913	0	MT-RNR2	rRNA	0	0	1	0
1920	45138	2	T	44909	A	115	3	112	0.25	115	3	112	11	3	8	103	16	87	44909	22059	22850	22059	22850	0	MT-RNR2	rRNA	0	0	1	1
1921	44530	0	A	44508	G	14	4	10	0.03	44508	22223	22285	2	2	0	14	4	10	6	0	6	22223	22285	0	MT-RNR2	rRNA	0	0	1	1
1922	45799	4	C	45760	T	20	18	2	0.04	8	5	3	45760	22373	23387	11	8	3	20	18	2	22373	23387	0	MT-RNR2	rRNA	0	0	1	1
1923	46061	0	C	46020	A	22	12	10	0.05	22	12	10	46020	22914	23106	10	7	3	9	8	1	22914	23106	0	MT-RNR2	rRNA	0	0	1	0
1924	45920	0	T	45882	G	18	16	2	0.04	14	6	8	6	4	2	18	16	2	45882	23076	22806	23076	22806	0	MT-RNR2	rRNA	0	0	1	1
1925	46572	0	A	46553	G	12	11	1	0.03	46553	23139	23414	4	3	1	12	11	1	3	1	2	23139	23414	0	MT-RNR2	rRNA	0	0	1	1
1926	45775	0	A	45757	G	11	6	5	0.02	45757	22376	23381	1	1	0	11	6	5	6	4	2	22376	23381	0	MT-RNR2	rRNA	0	0	1	0
1927	44397	0	G	44363	T	27	10	17	0.06	4	1	3	3	1	2	44363	20898	23465	27	10	17	20898	23465	0	MT-RNR2	rRNA	0	0	1	0
1928	43997	0	A	43977	G	12	3	9	0.03	43977	20766	23211	4	2	2	12	3	9	4	2	2	20766	23211	0	MT-RNR2	rRNA	0	0	1	1
1929	43558	0	A	43537	G	14	6	8	0.03	43537	20732	22805	5	5	0	14	6	8	2	1	1	20732	22805	0	MT-RNR2	rRNA	0	0	1	0
1930	43795	0	C	43758	A	25	12	13	0.06	25	12	13	43758	20588	23170	1	1	0	11	7	4	20588	23170	0	MT-RNR2	rRNA	0	0	1	0
1931	43471	0	A	43460	C	6	5	1	0.01	43460	20609	22851	6	5	1	3	2	1	2	1	1	20609	22851	0	MT-RNR2	rRNA	0	0	1	1
1932	43652	0	G	43617	T	23	19	4	0.05	3	2	1	9	6	3	43617	20657	22960	23	19	4	20657	22960	0	MT-RNR2	rRNA	0	0	1	1
1933	43185	0	C	43150	A	23	10	13	0.05	23	10	13	43150	20699	22451	1	0	1	11	6	5	20699	22451	0	MT-RNR2	rRNA	0	0	1	0
1934	43251	0	T	43172	A	35	2	33	0.08	35	2	33	18	6	12	26	5	21	43172	21064	22108	21064	22108	2	MT-RNR2	rRNA	1	0	1	1
1935	43911	12	A	43894	G	12	4	8	0.03	43894	21298	22596	2	2	0	12	4	8	3	1	2	21298	22596	6	MT-RNR2	rRNA	1	0	1	1
1936	44198	0	A	44184	G	9	4	5	0.02	44184	21567	22617	1	1	0	9	4	5	4	3	1	21567	22617	5	MT-RNR2	rRNA	1	0	1	1
1937	44067	0	A	44055	G	7	4	3	0.02	44055	21453	22602	2	2	0	7	4	3	3	1	2	21453	22602	4	MT-RNR2	rRNA	1	0	1	1
1938	43687	0	A	43672	G	9	5	4	0.02	43672	21456	22216	3	3	0	9	5	4	3	1	2	21456	22216	3	MT-RNR2	rRNA	1	0	1	1
1939	43167	0	G	43141	T	15	9	6	0.03	7	6	1	4	3	1	43141	21113	22028	15	9	6	21113	22028	1	MT-RNR2	rRNA	1	0	1	0
1940	41094	0	A	41081	G	10	2	8	0.02	41081	21099	19982	1	1	0	10	2	8	2	0	2	21099	19982	0	MT-RNR2	rRNA	0	0	1	1
1941	40796	0	G	40754	T	27	17	10	0.07	6	1	5	9	4	5	40754	20998	19756	27	17	10	20998	19756	0	MT-RNR2	rRNA	0	0	1	0
1942	39504	0	C	39446	A	43	32	11	0.11	43	32	11	39446	20950	18496	3	1	2	12	2	10	20950	18496	0	MT-RNR2	rRNA	0	0	1	0
1943	37032	1	A	36896	G	99	15	84	0.27	36896	21010	15886	19	3	16	99	15	84	18	11	7	21010	15886	0	MT-RNR2	rRNA	0	0	1	0
1944	37972	0	C	37900	A	42	25	17	0.11	42	25	17	37900	21328	16572	20	16	4	10	2	8	21328	16572	0	MT-RNR2	rRNA	0	0	1	0
1945	33097	0	A	33040	G	32	24	8	0.1	33040	21342	11698	14	4	10	32	24	8	11	11	0	21342	11698	0	MT-RNR2	rRNA	0	0	1	0
1946	36879	1	C	36830	A	23	10	13	0.06	23	10	13	36830	20805	16025	17	9	8	9	7	2	20805	16025	0	MT-RNR2	rRNA	0	0	1	0
1947	36712	1	C	36651	A	32	17	15	0.09	32	17	15	36651	20796	15855	7	2	5	22	13	9	20796	15855	0	MT-RNR2	rRNA	0	0	1	0
1948	37048	0	C	36979	A	41	8	33	0.11	41	8	33	36979	21250	15729	9	5	4	19	9	10	21250	15729	0	MT-RNR2	rRNA	0	0	1	0
1949	37086	0	G	37001	T	38	19	19	0.1	34	5	29	13	7	6	37001	21285	15716	38	19	19	21285	15716	0	MT-RNR2	rRNA	0	0	1	0
1950	34981	0	T	34930	G	20	5	15	0.06	13	6	7	18	7	11	20	5	15	34930	20611	14319	20611	14319	0	MT-RNR2	rRNA	0	0	1	0
1951	35374	0	C	35346	A	12	8	4	0.03	12	8	4	35346	21033	14313	8	4	4	8	3	5	21033	14313	0	MT-RNR2	rRNA	0	0	1	1
1952	35304	0	T	35281	A	13	4	9	0.04	13	4	9	3	2	1	7	0	7	35281	21047	14234	21047	14234	0	MT-RNR2	rRNA	0	0	1	1
1953	35205	0	A	35186	T	8	8	0	0.02	35186	21003	14183	4	3	1	7	4	3	8	8	0	21003	14183	0	MT-RNR2	rRNA	0	0	1	1
1954	35054	0	T	35036	C	14	9	5	0.04	3	3	0	14	9	5	1	1	0	35036	20895	14141	20895	14141	0	MT-RNR2	rRNA	0	0	1	0
1955	34847	0	G	34820	T	20	5	15	0.06	2	2	0	5	4	1	34820	20718	14102	20	5	15	20718	14102	0	MT-RNR2	rRNA	0	0	1	0
1956	34563	0	T	34556	C	5	3	2	0.01	2	2	0	5	3	2	0	0	0	34556	20513	14043	20513	14043	0	MT-RNR2	rRNA	0	0	1	1
1957	35122	0	A	35103	G	12	4	8	0.03	35103	20686	14417	4	2	2	12	4	8	3	1	2	20686	14417	0	MT-RNR2	rRNA	0	0	1	1
1958	36211	0	G	36176	T	22	15	7	0.06	9	6	3	4	2	2	36176	21028	15148	22	15	7	21028	15148	0	MT-RNR2	rRNA	0	0	1	0
1959	39395	4	C	39345	A	31	11	20	0.08	31	11	20	39345	21373	17972	5	3	2	14	5	9	21373	17972	2	MT-RNR2	rRNA	1	0	1	0
1960	38963	6	A	38919	G	34	7	27	0.09	38919	20965	17954	2	0	2	34	7	27	8	0	8	20965	17954	6	MT-RNR2	rRNA	1	0	1	0
1961	38986	0	A	38964	G	11	5	6	0.03	38964	20962	18002	9	1	8	11	5	6	2	1	1	20962	18002	5	MT-RNR2	rRNA	1	0	1	0
1962	39087	0	A	39071	T	7	1	6	0.02	39071	20931	18140	2	2	0	7	3	4	7	1	6	20931	18140	4	MT-RNR2	rRNA	1	0	1	1
1963	38994	2	A	38984	T	5	3	2	0.01	38984	20976	18008	2	2	0	3	0	3	5	3	2	20976	18008	3	MT-RNR2	rRNA	1	0	1	1
1964	39597	1	T	39574	C	9	4	5	0.02	6	6	0	9	4	5	8	3	5	39574	20882	18692	20882	18692	1	MT-RNR2	rRNA	1	0	1	1
1965	38711	1	A	38699	G	8	6	2	0.02	38699	19997	18702	2	2	0	8	6	2	2	0	2	19997	18702	0	MT-RNR2	rRNA	0	0	1	1
1966	38876	0	G	38852	T	11	7	4	0.03	5	2	3	8	3	5	38852	19929	18923	11	7	4	19929	18923	0	MT-RNR2	rRNA	0	0	1	1
1967	37674	0	T	37598	C	60	4	56	0.16	9	5	4	60	4	56	7	2	5	37598	19005	18593	19005	18593	0	MT-RNR2	rRNA	0	0	1	1
1968	38636	0	G	38601	T	24	11	13	0.06	7	2	5	4	2	2	38601	19681	18920	24	11	13	19681	18920	0	MT-RNR2	rRNA	0	0	1	0
1969	38179	0	G	38149	T	17	6	11	0.04	9	8	1	4	4	0	38149	19590	18559	17	6	11	19590	18559	0	MT-RNR2	rRNA	0	0	1	0
1970	37539	0	G	37499	A	21	6	15	0.06	21	6	15	7	1	6	37499	19677	17822	12	3	9	19677	17822	0	MT-RNR2	rRNA	0	0	1	0
1971	37782	0	A	37680	G	95	9	86	0.25	37680	19720	17960	6	3	3	95	9	86	1	0	1	19720	17960	0	MT-RNR2	rRNA	0	0	1	0
1972	37254	0	A	37218	G	27	5	22	0.07	37218	19447	17771	4	1	3	27	5	22	5	0	5	19447	17771	0	MT-RNR2	rRNA	0	0	1	0
1973	37246	0	G	37216	T	18	10	8	0.05	7	3	4	5	0	5	37216	19434	17782	18	10	8	19434	17782	0	MT-RNR2	rRNA	0	0	1	0
1974	37126	0	A	37104	G	12	1	11	0.03	37104	19547	17557	2	2	0	12	1	11	8	3	5	19547	17557	0	MT-RNR2	rRNA	0	0	1	1
1975	37457	0	T	37438	A	8	4	4	0.02	8	4	4	7	1	6	4	1	3	37438	19467	17971	19467	17971	0	MT-RNR2	rRNA	0	0	1	1
1976	37910	0	T	37903	C	4	3	1	0.01	2	2	0	4	3	1	1	0	1	37903	19437	18466	19437	18466	0	MT-RNR2	rRNA	0	0	1	1
1977	37816	0	T	37809	C	4	0	4	0.01	1	1	0	4	0	4	2	2	0	37809	19579	18230	19579	18230	0	MT-RNR2	rRNA	0	0	1	1
1978	38500	0	A	38488	G	6	4	2	0.02	38488	19500	18988	2	0	2	6	4	2	4	1	3	19500	18988	0	MT-RNR2	rRNA	0	0	1	1
1979	39246	0	T	39228	C	10	2	8	0.03	5	1	4	10	2	8	3	0	3	39228	19367	19861	19367	19861	0	MT-RNR2	rRNA	0	0	1	1
1980	39733	0	A	39714	T	11	2	9	0.03	39714	19120	20594	6	0	6	2	1	1	11	2	9	19120	20594	0	MT-RNR2	rRNA	0	0	1	1
1981	40499	0	G	40484	T	10	5	5	0.02	3	2	1	2	1	1	40484	19166	21318	10	5	5	19166	21318	0	MT-RNR2	rRNA	0	0	1	0
1982	40275	0	G	40251	T	13	6	7	0.03	8	2	6	3	0	3	40251	19228	21023	13	6	7	19228	21023	0	MT-RNR2	rRNA	0	0	1	0
1983	39413	0	T	39390	C	18	5	13	0.05	4	2	2	18	5	13	1	0	1	39390	18482	20908	18482	20908	0	MT-RNR2	rRNA	0	0	1	0
1984	39991	2	A	39965	G	12	6	6	0.03	39965	18822	21143	6	1	5	12	6	6	8	2	6	18822	21143	0	MT-RNR2	rRNA	0	0	1	0
1985	40137	0	G	40106	T	13	5	8	0.03	12	2	10	6	4	2	40106	18975	21131	13	5	8	18975	21131	0	MT-RNR2	rRNA	0	0	1	0
1986	39930	1	A	39900	G	16	8	8	0.04	39900	18997	20903	6	3	3	16	8	8	8	2	6	18997	20903	0	MT-RNR2	rRNA	0	0	1	0
1987	40171	3	G	40138	T	20	10	10	0.05	4	1	3	9	5	4	40138	19079	21059	20	10	10	19079	21059	0	MT-RNR2	rRNA	0	0	1	0
1988	38566	0	G	38519	T	33	23	10	0.09	8	5	3	6	2	4	38519	17913	20606	33	23	10	17913	20606	0	MT-RNR2	rRNA	0	0	1	0
1989	39070	0	C	39022	A	31	14	17	0.08	31	14	17	39022	18638	20384	3	2	1	14	6	8	18638	20384	0	MT-RNR2	rRNA	0	0	1	0
1990	38822	0	G	38781	A	22	7	15	0.06	22	7	15	9	3	6	38781	18574	20207	10	5	5	18574	20207	0	MT-RNR2	rRNA	0	0	1	0
1991	37985	0	A	37949	G	25	9	16	0.07	37949	18246	19703	7	3	4	25	9	16	4	2	2	18246	19703	0	MT-RNR2	rRNA	0	0	1	0
1992	39056	0	C	39006	G	18	4	14	0.05	15	2	13	39006	18932	20074	18	4	14	17	4	13	18932	20074	0	MT-RNR2	rRNA	0	0	1	1
1993	39095	0	A	39027	G	58	10	48	0.15	39027	18854	20173	7	1	6	58	10	48	3	0	3	18854	20173	0	MT-RNR2	rRNA	0	0	1	0
1994	38892	0	A	38874	G	14	6	8	0.04	38874	19025	19849	1	0	1	14	6	8	3	3	0	19025	19849	0	MT-RNR2	rRNA	0	0	1	0
1995	34679	0	A	34663	C	9	5	4	0.03	34663	18212	16451	9	5	4	6	2	4	1	0	1	18212	16451	0	MT-RNR2	rRNA	0	0	1	1
1996	38209	0	C	38187	A	12	6	6	0.03	12	6	6	38187	18083	20104	2	1	1	8	4	4	18083	20104	0	MT-RNR2	rRNA	0	0	1	0
1997	38189	0	C	38154	A	23	7	16	0.06	23	7	16	38154	18365	19789	3	1	2	9	6	3	18365	19789	0	MT-RNR2	rRNA	0	0	1	0
1998	38170	0	T	38149	C	11	2	9	0.03	7	1	6	11	2	9	3	0	3	38149	18370	19779	18370	19779	0	MT-RNR2	rRNA	0	0	1	1
1999	38022	0	A	37989	G	13	10	3	0.03	37989	18552	19437	9	7	2	13	10	3	11	2	9	18552	19437	0	MT-RNR2	rRNA	0	0	1	1
[truncated: 14,575 more rows]

## Sheet: GM14452
pos	hq	indels	best	best_count	second_best	second_best_count	second_best_for	second_best_rev	fraction_percent	A	A.for	A.rev	C	C.for	C.rev	G	G.for	G.rev	T	T.for	T.rev	best_count.for	best_count.rev	LCR	gene	coding for	Filter A	Filter B	Filter C	Filter D
1	14	0	G	14	A	0	0	0	0	0	0	0	0	0	0	14	6	8	0	0	0	6	8	0	MT-DLOOP	D-LOOP	0	1	1	1
2	54	0	A	54	T	0	0	0	0	54	17	37	0	0	0	0	0	0	0	0	0	17	37	0	MT-DLOOP	D-LOOP	0	1	1	1
3	60	0	T	59	C	1	1	0	1.67	0	0	0	1	1	0	0	0	0	59	17	42	17	42	0	MT-DLOOP	D-LOOP	0	1	1	1
4	95	0	C	95	A	0	0	0	0	0	0	0	95	38	57	0	0	0	0	0	0	38	57	0	MT-DLOOP	D-LOOP	0	1	1	1
5	86	0	A	86	T	0	0	0	0	86	40	46	0	0	0	0	0	0	0	0	0	40	46	0	MT-DLOOP	D-LOOP	0	1	1	1
6	112	0	C	112	A	0	0	0	0	0	0	0	112	52	60	0	0	0	0	0	0	52	60	0	MT-DLOOP	D-LOOP	0	1	1	1
7	133	0	A	133	T	0	0	0	0	133	52	81	0	0	0	0	0	0	0	0	0	52	81	0	MT-DLOOP	D-LOOP	0	1	1	1
8	217	0	G	217	A	0	0	0	0	0	0	0	0	0	0	217	56	161	0	0	0	56	161	0	MT-DLOOP	D-LOOP	0	1	1	1
9	299	0	G	298	T	1	0	1	0.33	0	0	0	0	0	0	298	60	238	1	0	1	60	238	0	MT-DLOOP	D-LOOP	0	1	1	1
10	315	0	T	315	A	0	0	0	0	0	0	0	0	0	0	0	0	0	315	60	255	60	255	0	MT-DLOOP	D-LOOP	0	1	1	1
11	334	0	C	334	A	0	0	0	0	0	0	0	334	67	267	0	0	0	0	0	0	67	267	0	MT-DLOOP	D-LOOP	0	1	1	1
12	343	0	T	343	A	0	0	0	0	0	0	0	0	0	0	0	0	0	343	78	265	78	265	0	MT-DLOOP	D-LOOP	0	1	1	1
13	320	0	A	320	T	0	0	0	0	320	79	241	0	0	0	0	0	0	0	0	0	79	241	0	MT-DLOOP	D-LOOP	0	1	1	1
14	316	0	T	315	C	1	1	0	0.32	0	0	0	1	1	0	0	0	0	315	79	236	79	236	0	MT-DLOOP	D-LOOP	0	1	1	1
15	354	0	C	354	A	0	0	0	0	0	0	0	354	90	264	0	0	0	0	0	0	90	264	0	MT-DLOOP	D-LOOP	0	1	1	1
16	203	0	A	200	G	2	2	0	0.99	200	92	108	1	1	0	2	2	0	0	0	0	92	108	0	MT-DLOOP	D-LOOP	0	1	1	1
17	413	0	C	413	A	0	0	0	0	0	0	0	413	105	308	0	0	0	0	0	0	105	308	0	MT-DLOOP	D-LOOP	0	1	1	1
18	421	0	C	421	A	0	0	0	0	0	0	0	421	109	312	0	0	0	0	0	0	109	312	0	MT-DLOOP	D-LOOP	0	1	1	1
19	442	0	C	442	A	0	0	0	0	0	0	0	442	128	314	0	0	0	0	0	0	128	314	0	MT-DLOOP	D-LOOP	0	1	1	1
20	441	0	T	441	A	0	0	0	0	0	0	0	0	0	0	0	0	0	441	132	309	132	309	0	MT-DLOOP	D-LOOP	0	1	1	1
21	451	0	A	451	T	0	0	0	0	451	142	309	0	0	0	0	0	0	0	0	0	142	309	0	MT-DLOOP	D-LOOP	0	1	1	1
22	465	0	T	465	A	0	0	0	0	0	0	0	0	0	0	0	0	0	465	142	323	142	323	0	MT-DLOOP	D-LOOP	0	1	1	1
23	475	0	T	473	C	2	0	2	0.42	0	0	0	2	0	2	0	0	0	473	145	328	145	328	0	MT-DLOOP	D-LOOP	0	1	1	1
24	488	0	A	488	T	0	0	0	0	488	148	340	0	0	0	0	0	0	0	0	0	148	340	0	MT-DLOOP	D-LOOP	0	1	1	1
25	507	0	A	507	T	0	0	0	0	507	149	358	0	0	0	0	0	0	0	0	0	149	358	0	MT-DLOOP	D-LOOP	0	1	1	1
26	548	0	C	548	A	0	0	0	0	0	0	0	548	151	397	0	0	0	0	0	0	151	397	0	MT-DLOOP	D-LOOP	0	1	1	1
27	538	0	C	538	A	0	0	0	0	0	0	0	538	153	385	0	0	0	0	0	0	153	385	0	MT-DLOOP	D-LOOP	0	1	1	1
28	438	0	A	437	T	1	1	0	0.23	437	155	282	0	0	0	0	0	0	1	1	0	155	282	0	MT-DLOOP	D-LOOP	0	1	1	1
29	574	0	C	574	A	0	0	0	0	0	0	0	574	175	399	0	0	0	0	0	0	175	399	0	MT-DLOOP	D-LOOP	0	1	1	1
30	555	0	T	554	G	1	0	1	0.18	0	0	0	0	0	0	1	0	1	554	176	378	176	378	0	MT-DLOOP	D-LOOP	0	1	1	1
31	586	0	C	586	A	0	0	0	0	0	0	0	586	195	391	0	0	0	0	0	0	195	391	0	MT-DLOOP	D-LOOP	0	1	1	1
32	576	0	A	575	T	1	1	0	0.17	575	195	380	0	0	0	0	0	0	1	1	0	195	380	0	MT-DLOOP	D-LOOP	0	1	1	1
33	629	0	C	629	A	0	0	0	0	0	0	0	629	218	411	0	0	0	0	0	0	218	411	0	MT-DLOOP	D-LOOP	0	1	1	1
34	657	0	G	657	A	0	0	0	0	0	0	0	0	0	0	657	238	419	0	0	0	238	419	0	MT-DLOOP	D-LOOP	0	1	1	1
35	661	0	G	660	A	1	1	0	0.15	1	1	0	0	0	0	660	241	419	0	0	0	241	419	0	MT-DLOOP	D-LOOP	0	1	1	1
36	680	0	G	680	A	0	0	0	0	0	0	0	0	0	0	680	263	417	0	0	0	263	417	0	MT-DLOOP	D-LOOP	0	1	1	1
37	689	0	A	689	T	0	0	0	0	689	262	427	0	0	0	0	0	0	0	0	0	262	427	0	MT-DLOOP	D-LOOP	0	1	1	1
38	707	0	G	707	A	0	0	0	0	0	0	0	0	0	0	707	276	431	0	0	0	276	431	0	MT-DLOOP	D-LOOP	0	1	1	1
39	732	0	C	730	T	2	1	1	0.27	0	0	0	730	283	447	0	0	0	2	1	1	283	447	0	MT-DLOOP	D-LOOP	0	1	1	1
40	736	0	T	733	C	2	2	0	0.27	0	0	0	2	2	0	1	1	0	733	303	430	303	430	0	MT-DLOOP	D-LOOP	0	1	1	1
41	769	0	C	769	A	0	0	0	0	0	0	0	769	314	455	0	0	0	0	0	0	314	455	0	MT-DLOOP	D-LOOP	0	1	1	1
42	785	0	T	785	A	0	0	0	0	0	0	0	0	0	0	0	0	0	785	318	467	318	467	0	MT-DLOOP	D-LOOP	0	1	1	1
43	801	0	C	800	T	1	1	0	0.12	0	0	0	800	321	479	0	0	0	1	1	0	321	479	0	MT-DLOOP	D-LOOP	0	1	1	1
44	938	0	C	937	G	1	0	1	0.11	0	0	0	937	326	611	1	0	1	0	0	0	326	611	0	MT-DLOOP	D-LOOP	0	1	1	1
45	933	0	A	932	G	1	1	0	0.11	932	330	602	0	0	0	1	1	0	0	0	0	330	602	0	MT-DLOOP	D-LOOP	0	1	1	1
46	960	0	T	959	C	1	1	0	0.1	0	0	0	1	1	0	0	0	0	959	345	614	345	614	0	MT-DLOOP	D-LOOP	0	1	1	1
47	985	0	G	984	C	1	0	1	0.1	0	0	0	1	0	1	984	362	622	0	0	0	362	622	0	MT-DLOOP	D-LOOP	0	1	1	1
48	982	0	C	981	T	1	0	1	0.1	0	0	0	981	367	614	0	0	0	1	0	1	367	614	0	MT-DLOOP	D-LOOP	0	1	1	1
49	982	0	A	981	C	1	1	0	0.1	981	375	606	1	1	0	0	0	0	0	0	0	375	606	0	MT-DLOOP	D-LOOP	0	1	1	1
50	1010	0	T	1010	A	0	0	0	0	0	0	0	0	0	0	0	0	0	1010	378	632	378	632	0	MT-DLOOP	D-LOOP	0	0	1	1
51	1026	0	T	1026	A	0	0	0	0	0	0	0	0	0	0	0	0	0	1026	394	632	394	632	0	MT-DLOOP	D-LOOP	0	0	1	1
52	1030	0	T	1030	A	0	0	0	0	0	0	0	0	0	0	0	0	0	1030	402	628	402	628	0	MT-DLOOP	D-LOOP	0	0	1	1
53	1057	0	G	1057	A	0	0	0	0	0	0	0	0	0	0	1057	408	649	0	0	0	408	649	0	MT-DLOOP	D-LOOP	0	0	1	1
54	1057	0	G	1057	A	0	0	0	0	0	0	0	0	0	0	1057	418	639	0	0	0	418	639	0	MT-DLOOP	D-LOOP	0	0	1	1
55	1048	0	T	1048	A	0	0	0	0	0	0	0	0	0	0	0	0	0	1048	413	635	413	635	0	MT-DLOOP	D-LOOP	0	0	1	1
56	1044	0	A	1044	T	0	0	0	0	1044	442	602	0	0	0	0	0	0	0	0	0	442	602	2	MT-DLOOP	D-LOOP	1	0	1	1
57	1103	0	T	1103	A	0	0	0	0	0	0	0	0	0	0	0	0	0	1103	456	647	456	647	6	MT-DLOOP	D-LOOP	1	0	1	1
58	1107	0	T	1107	A	0	0	0	0	0	0	0	0	0	0	0	0	0	1107	460	647	460	647	5	MT-DLOOP	D-LOOP	1	0	1	1
59	1104	0	T	1104	A	0	0	0	0	0	0	0	0	0	0	0	0	0	1104	462	642	462	642	4	MT-DLOOP	D-LOOP	1	0	1	1
60	1048	0	T	1048	A	0	0	0	0	0	0	0	0	0	0	0	0	0	1048	462	586	462	586	3	MT-DLOOP	D-LOOP	1	0	1	1
61	1098	0	C	1098	A	0	0	0	0	0	0	0	1098	467	631	0	0	0	0	0	0	467	631	1	MT-DLOOP	D-LOOP	1	0	1	1
62	1156	0	G	1155	T	1	0	1	0.09	0	0	0	0	0	0	1155	477	678	1	0	1	477	678	0	MT-DLOOP	D-LOOP	0	0	1	1
63	1135	0	T	1135	A	0	0	0	0	0	0	0	0	0	0	0	0	0	1135	477	658	477	658	0	MT-DLOOP	D-LOOP	0	0	1	1
64	1165	0	C	1165	A	0	0	0	0	0	0	0	1165	501	664	0	0	0	0	0	0	501	664	0	MT-DLOOP	D-LOOP	0	0	1	1
65	1146	0	T	1142	C	4	4	0	0.35	0	0	0	4	4	0	0	0	0	1142	513	629	513	629	2	MT-DLOOP	D-LOOP	1	0	1	1
66	1244	0	G	1242	C	2	2	0	0.16	0	0	0	2	2	0	1242	526	716	0	0	0	526	716	2	MT-DLOOP	D-LOOP	1	0	1	1
67	1263	0	G	1258	T	4	3	1	0.32	0	0	0	1	1	0	1258	531	727	4	3	1	531	727	2	MT-DLOOP	D-LOOP	1	0	1	1
68	1288	0	G	1287	T	1	1	0	0.08	0	0	0	0	0	0	1287	565	722	1	1	0	565	722	4	MT-DLOOP	D-LOOP	1	0	1	1
69	1310	0	G	1308	A	2	2	0	0.15	2	2	0	0	0	0	1308	569	739	0	0	0	569	739	3	MT-DLOOP	D-LOOP	1	0	1	1
70	1323	0	G	1323	A	0	0	0	0	0	0	0	0	0	0	1323	587	736	0	0	0	587	736	1	MT-DLOOP	D-LOOP	1	0	1	1
71	1298	0	G	1298	A	0	0	0	0	0	0	0	0	0	0	1298	582	716	0	0	0	582	716	1	MT-DLOOP	D-LOOP	1	0	1	1
72	913	0	T	911	C	2	2	0	0.22	0	0	0	2	2	0	0	0	0	911	202	709	202	709	1	MT-DLOOP	D-LOOP	1	1	1	1
73	1240	0	G	1240	A	0	0	0	0	0	0	0	0	0	0	1240	518	722	0	0	0	518	722	0	MT-DLOOP	D-LOOP	0	0	1	1
74	1166	0	T	1165	C	1	1	0	0.09	0	0	0	1	1	0	0	0	0	1165	472	693	472	693	0	MT-DLOOP	D-LOOP	0	0	1	1
75	1329	0	G	1329	A	0	0	0	0	0	0	0	0	0	0	1329	659	670	0	0	0	659	670	0	MT-DLOOP	D-LOOP	0	0	1	1
76	1410	0	C	1409	T	1	0	1	0.07	0	0	0	1409	736	673	0	0	0	1	0	1	736	673	0	MT-DLOOP	D-LOOP	0	0	1	1
77	1374	0	A	1374	T	0	0	0	0	1374	754	620	0	0	0	0	0	0	0	0	0	754	620	0	MT-DLOOP	D-LOOP	0	0	1	1
78	1549	0	C	1549	A	0	0	0	0	0	0	0	1549	841	708	0	0	0	0	0	0	841	708	0	MT-DLOOP	D-LOOP	0	0	1	1
79	1597	0	G	1595	A	1	1	0	0.06	1	1	0	1	1	0	1595	853	742	0	0	0	853	742	0	MT-DLOOP	D-LOOP	0	0	1	1
80	1603	0	C	1603	A	0	0	0	0	0	0	0	1603	872	731	0	0	0	0	0	0	872	731	0	MT-DLOOP	D-LOOP	0	0	1	1
81	1610	0	G	1610	A	0	0	0	0	0	0	0	0	0	0	1610	874	736	0	0	0	874	736	0	MT-DLOOP	D-LOOP	0	0	1	1
82	1604	0	A	1603	T	1	0	1	0.06	1603	868	735	0	0	0	0	0	0	1	0	1	868	735	0	MT-DLOOP	D-LOOP	0	0	1	1
83	1669	0	T	1669	A	0	0	0	0	0	0	0	0	0	0	0	0	0	1669	875	794	875	794	0	MT-DLOOP	D-LOOP	0	0	1	1
84	1640	0	A	1639	T	1	1	0	0.06	1639	872	767	0	0	0	0	0	0	1	1	0	872	767	0	MT-DLOOP	D-LOOP	0	0	1	1
85	1701	0	G	1701	A	0	0	0	0	0	0	0	0	0	0	1701	888	813	0	0	0	888	813	0	MT-DLOOP	D-LOOP	0	0	1	1
86	1704	0	C	1702	T	1	0	1	0.06	0	0	0	1702	901	801	1	0	1	1	0	1	901	801	0	MT-DLOOP	D-LOOP	0	0	1	1
87	1619	0	A	1619	T	0	0	0	0	1619	902	717	0	0	0	0	0	0	0	0	0	902	717	0	MT-DLOOP	D-LOOP	0	0	1	1
88	1723	0	T	1723	A	0	0	0	0	0	0	0	0	0	0	0	0	0	1723	905	818	905	818	0	MT-DLOOP	D-LOOP	0	0	1	1
89	1649	0	T	1646	C	3	3	0	0.18	0	0	0	3	3	0	0	0	0	1646	907	739	907	739	0	MT-DLOOP	D-LOOP	0	0	1	1
90	1759	0	G	1758	C	1	0	1	0.06	0	0	0	1	0	1	1758	933	825	0	0	0	933	825	0	MT-DLOOP	D-LOOP	0	0	1	1
91	1772	0	C	1770	A	1	1	0	0.06	1	1	0	1770	937	833	0	0	0	1	0	1	937	833	0	MT-DLOOP	D-LOOP	0	0	1	1
92	1789	0	G	1787	A	1	1	0	0.06	1	1	0	0	0	0	1787	929	858	1	0	1	929	858	0	MT-DLOOP	D-LOOP	0	0	1	1
93	1766	0	A	1765	C	1	1	0	0.06	1765	931	834	1	1	0	0	0	0	0	0	0	931	834	0	MT-DLOOP	D-LOOP	0	0	1	1
94	1797	0	G	1796	T	1	1	0	0.06	0	0	0	0	0	0	1796	940	856	1	1	0	940	856	0	MT-DLOOP	D-LOOP	0	0	1	1
95	1724	0	A	1723	G	1	1	0	0.06	1723	921	802	0	0	0	1	1	0	0	0	0	921	802	0	MT-DLOOP	D-LOOP	0	0	1	1
96	1784	0	C	1783	T	1	0	1	0.06	0	0	0	1783	938	845	0	0	0	1	0	1	938	845	0	MT-DLOOP	D-LOOP	0	0	1	1
97	1819	0	G	1819	A	0	0	0	0	0	0	0	0	0	0	1819	958	861	0	0	0	958	861	0	MT-DLOOP	D-LOOP	0	0	1	1
98	1840	0	C	1840	A	0	0	0	0	0	0	0	1840	973	867	0	0	0	0	0	0	973	867	0	MT-DLOOP	D-LOOP	0	0	1	1
99	1817	0	T	1810	C	5	1	4	0.28	2	0	2	5	1	4	0	0	0	1810	963	847	963	847	0	MT-DLOOP	D-LOOP	0	0	1	1
100	1856	0	G	1856	A	0	0	0	0	0	0	0	0	0	0	1856	983	873	0	0	0	983	873	0	MT-DLOOP	D-LOOP	0	0	1	1
101	1841	0	G	1840	T	1	1	0	0.05	0	0	0	0	0	0	1840	977	863	1	1	0	977	863	0	MT-DLOOP	D-LOOP	0	0	1	1
102	1778	0	A	1770	C	4	3	1	0.22	1770	947	823	4	3	1	2	2	0	2	2	0	947	823	0	MT-DLOOP	D-LOOP	0	0	1	1
103	1822	0	G	1821	A	1	0	1	0.05	1	0	1	0	0	0	1821	1000	821	0	0	0	1000	821	0	MT-DLOOP	D-LOOP	0	0	1	1
104	1829	0	C	1828	G	1	0	1	0.05	0	0	0	1828	992	836	1	0	1	0	0	0	992	836	0	MT-DLOOP	D-LOOP	0	0	1	1
105	1847	0	C	1846	T	1	1	0	0.05	0	0	0	1846	1012	834	0	0	0	1	1	0	1012	834	0	MT-DLOOP	D-LOOP	0	0	1	1
106	1836	0	G	1828	A	7	0	7	0.38	7	0	7	0	0	0	1828	995	833	1	0	1	995	833	0	MT-DLOOP	D-LOOP	0	0	1	1
107	1822	0	G	1819	A	2	0	2	0.11	2	0	2	0	0	0	1819	1011	808	1	0	1	1011	808	0	MT-DLOOP	D-LOOP	0	0	1	1
108	1599	0	A	1584	G	11	2	9	0.69	1584	861	723	4	0	4	11	2	9	0	0	0	861	723	0	MT-DLOOP	D-LOOP	0	0	1	1
109	1615	0	G	1610	T	2	0	2	0.12	1	1	0	2	2	0	1610	975	635	2	0	2	975	635	0	MT-DLOOP	D-LOOP	0	0	1	1
110	1590	0	C	1589	A	1	0	1	0.06	1	0	1	1589	954	635	0	0	0	0	0	0	954	635	0	MT-DLOOP	D-LOOP	0	0	1	1
111	1526	0	A	1523	T	2	2	0	0.13	1523	986	537	0	0	0	1	1	0	2	2	0	986	537	0	MT-DLOOP	D-LOOP	0	0	1	1
112	1669	0	C	1669	A	0	0	0	0	0	0	0	1669	1023	646	0	0	0	0	0	0	1023	646	0	MT-DLOOP	D-LOOP	0	0	1	1
113	1694	0	C	1691	T	3	1	2	0.18	0	0	0	1691	1046	645	0	0	0	3	1	2	1046	645	0	MT-DLOOP	D-LOOP	0	0	1	1
114	1787	0	C	1786	T	1	0	1	0.06	0	0	0	1786	1086	700	0	0	0	1	0	1	1086	700	0	MT-DLOOP	D-LOOP	0	0	1	1
115	1764	0	T	1757	A	4	0	4	0.23	4	0	4	2	1	1	1	1	0	1757	1072	685	1072	685	0	MT-DLOOP	D-LOOP	0	0	1	1
116	1739	0	A	1736	G	3	1	2	0.17	1736	1067	669	0	0	0	3	1	2	0	0	0	1067	669	0	MT-DLOOP	D-LOOP	0	0	1	1
117	1783	0	T	1781	A	1	0	1	0.06	1	0	1	1	0	1	0	0	0	1781	1074	707	1074	707	0	MT-DLOOP	D-LOOP	0	0	1	1
118	1853	0	G	1848	A	3	3	0	0.16	3	3	0	1	1	0	1848	1130	718	1	1	0	1130	718	0	MT-DLOOP	D-LOOP	0	0	1	1
119	1794	0	T	1788	C	5	0	5	0.28	0	0	0	5	0	5	1	1	0	1788	1081	707	1081	707	0	MT-DLOOP	D-LOOP	0	0	1	1
120	1851	0	C	1848	A	1	0	1	0.05	1	0	1	1848	1131	717	1	1	0	1	1	0	1131	717	0	MT-DLOOP	D-LOOP	0	0	1	1
121	1879	0	G	1875	A	2	1	1	0.11	2	1	1	2	2	0	1875	1157	718	0	0	0	1157	718	0	MT-DLOOP	D-LOOP	0	0	1	1
122	1898	0	C	1896	G	2	1	1	0.11	0	0	0	1896	1175	721	2	1	1	0	0	0	1175	721	0	MT-DLOOP	D-LOOP	0	0	1	1
123	1794	0	A	1791	G	2	2	0	0.11	1791	1071	720	0	0	0	2	2	0	1	0	1	1071	720	0	MT-DLOOP	D-LOOP	0	0	1	1
124	1863	0	G	1860	A	2	2	0	0.11	2	2	0	0	0	0	1860	1148	712	1	1	0	1148	712	0	MT-DLOOP	D-LOOP	0	0	1	1
125	1737	0	T	1735	C	1	1	0	0.06	0	0	0	1	1	0	1	1	0	1735	1079	656	1079	656	0	MT-DLOOP	D-LOOP	0	0	1	1
126	1822	0	A	1816	T	3	2	1	0.16	1816	1151	665	1	0	1	2	2	0	3	2	1	1151	665	0	MT-DLOOP	D-LOOP	0	0	1	1
127	1874	0	T	1871	C	2	1	1	0.11	0	0	0	2	1	1	1	0	1	1871	1184	687	1184	687	0	MT-DLOOP	D-LOOP	0	0	1	1
128	1927	0	C	1926	A	1	0	1	0.05	1	0	1	1926	1231	695	0	0	0	0	0	0	1231	695	0	MT-DLOOP	D-LOOP	0	0	1	1
129	1911	0	T	1908	G	2	1	1	0.1	0	0	0	1	1	0	2	1	1	1908	1203	705	1203	705	0	MT-DLOOP	D-LOOP	0	0	1	1
130	1952	0	G	1949	C	2	0	2	0.1	1	0	1	2	0	2	1949	1237	712	0	0	0	1237	712	0	MT-DLOOP	D-LOOP	0	0	1	1
131	1877	0	T	1874	C	2	2	0	0.11	1	1	0	2	2	0	0	0	0	1874	1162	712	1162	712	0	MT-DLOOP	D-LOOP	0	0	1	1
132	2007	0	C	2004	T	2	1	1	0.1	1	1	0	2004	1280	724	0	0	0	2	1	1	1280	724	0	MT-DLOOP	D-LOOP	0	0	1	1
133	2076	1	T	2074	C	1	0	1	0.05	0	0	0	1	0	1	1	1	0	2074	1346	728	1346	728	0	MT-DLOOP	D-LOOP	0	0	1	1
134	2076	0	T	2076	A	0	0	0	0	0	0	0	0	0	0	0	0	0	2076	1345	731	1345	731	0	MT-DLOOP	D-LOOP	0	0	1	1
135	2068	0	T	2066	A	1	1	0	0.05	1	1	0	1	1	0	0	0	0	2066	1338	728	1338	728	0	MT-DLOOP	D-LOOP	0	0	1	1
136	2047	0	G	2047	A	0	0	0	0	0	0	0	0	0	0	2047	1318	729	0	0	0	1318	729	0	MT-DLOOP	D-LOOP	0	0	1	1
137	2006	0	A	2006	T	0	0	0	0	2006	1284	722	0	0	0	0	0	0	0	0	0	1284	722	0	MT-DLOOP	D-LOOP	0	0	1	1
138	2037	0	T	2036	A	1	1	0	0.05	1	1	0	0	0	0	0	0	0	2036	1308	728	1308	728	0	MT-DLOOP	D-LOOP	0	0	1	1
139	2038	0	T	2028	C	7	7	0	0.34	3	3	0	7	7	0	0	0	0	2028	1323	705	1323	705	0	MT-DLOOP	D-LOOP	0	0	1	1
140	2079	0	C	2071	T	5	4	1	0.24	2	2	0	2071	1336	735	1	1	0	5	4	1	1336	735	0	MT-DLOOP	D-LOOP	0	0	1	1
141	2113	0	C	2111	T	2	2	0	0.09	0	0	0	2111	1366	745	0	0	0	2	2	0	1366	745	0	MT-DLOOP	D-LOOP	0	0	1	1
142	2102	0	T	2098	C	4	3	1	0.19	0	0	0	4	3	1	0	0	0	2098	1356	742	1356	742	0	MT-DLOOP	D-LOOP	0	0	1	1
143	2111	0	G	2105	A	2	0	2	0.09	2	0	2	2	1	1	2105	1362	743	2	2	0	1362	743	0	MT-DLOOP	D-LOOP	0	0	1	1
144	2022	0	C	2017	T	4	1	3	0.2	1	1	0	2017	1410	607	0	0	0	4	1	3	1410	607	0	MT-DLOOP	D-LOOP	0	0	1	1
145	2067	0	C	2061	T	4	4	0	0.19	0	0	0	2061	1457	604	2	1	1	4	4	0	1457	604	0	MT-DLOOP	D-LOOP	0	0	1	1
146	2053	0	T	2046	C	4	4	0	0.19	2	1	1	4	4	0	1	0	1	2046	1440	606	1440	606	0	MT-DLOOP	D-LOOP	0	0	1	1
147	2060	0	C	2056	T	3	3	0	0.15	1	0	1	2056	1442	614	0	0	0	3	3	0	1442	614	0	MT-DLOOP	D-LOOP	0	0	1	1
148	2052	0	A	2043	G	5	5	0	0.24	2043	1425	618	1	1	0	5	5	0	3	2	1	1425	618	0	MT-DLOOP	D-LOOP	0	0	1	1
149	2067	0	T	2066	C	1	0	1	0.05	0	0	0	1	0	1	0	0	0	2066	1450	616	1450	616	0	MT-DLOOP	D-LOOP	0	0	1	1
150	2098	0	C	2096	A	1	1	0	0.05	1	1	0	2096	1445	651	0	0	0	1	0	1	1445	651	0	MT-DLOOP	D-LOOP	0	0	1	1
151	2124	0	C	2124	A	0	0	0	0	0	0	0	2124	1469	655	0	0	0	0	0	0	1469	655	0	MT-DLOOP	D-LOOP	0	0	1	1
152	2102	0	T	2102	A	0	0	0	0	0	0	0	0	0	0	0	0	0	2102	1457	645	1457	645	0	MT-DLOOP	D-LOOP	0	0	1	1
153	2111	0	A	2109	T	2	2	0	0.09	2109	1464	645	0	0	0	0	0	0	2	2	0	1464	645	0	MT-DLOOP	D-LOOP	0	0	1	1
154	2114	0	T	2113	C	1	0	1	0.05	0	0	0	1	0	1	0	0	0	2113	1469	644	1469	644	0	MT-DLOOP	D-LOOP	0	0	1	1
155	2152	0	T	2152	A	0	0	0	0	0	0	0	0	0	0	0	0	0	2152	1494	658	1494	658	0	MT-DLOOP	D-LOOP	0	0	1	1
156	2331	0	A	2327	T	3	2	1	0.13	2327	1543	784	0	0	0	1	0	1	3	2	1	1543	784	0	MT-DLOOP	D-LOOP	0	0	1	1
157	2327	1	T	2326	A	1	0	1	0.04	1	0	1	0	0	0	0	0	0	2326	1537	789	1537	789	0	MT-DLOOP	D-LOOP	0	0	1	1
158	2365	0	T	2364	C	1	0	1	0.04	0	0	0	1	0	1	0	0	0	2364	1544	820	1544	820	0	MT-DLOOP	D-LOOP	0	0	1	1
159	2386	0	T	2385	C	1	0	1	0.04	0	0	0	1	0	1	0	0	0	2385	1553	832	1553	832	0	MT-DLOOP	D-LOOP	0	0	1	1
160	2414	0	A	2410	C	2	2	0	0.08	2410	1586	824	2	2	0	1	1	0	1	0	1	1586	824	0	MT-DLOOP	D-LOOP	0	0	1	1
161	2417	0	T	2414	C	3	2	1	0.12	0	0	0	3	2	1	0	0	0	2414	1588	826	1588	826	0	MT-DLOOP	D-LOOP	0	0	1	1
162	2453	0	C	2451	T	2	2	0	0.08	0	0	0	2451	1602	849	0	0	0	2	2	0	1602	849	0	MT-DLOOP	D-LOOP	0	0	1	1
163	2472	0	G	2468	A	2	2	0	0.08	2	2	0	1	1	0	2468	1602	866	1	0	1	1602	866	0	MT-DLOOP	D-LOOP	0	0	1	1
164	2584	1	C	2581	T	2	1	1	0.08	0	0	0	2581	1615	966	1	1	0	2	1	1	1615	966	0	MT-DLOOP	D-LOOP	0	0	1	1
165	2553	0	A	2538	G	8	7	1	0.31	2538	1583	955	1	0	1	8	7	1	6	2	4	1583	955	0	MT-DLOOP	D-LOOP	0	0	1	1
166	2659	0	C	2655	T	2	1	1	0.08	0	0	0	2655	1647	1008	2	1	1	2	1	1	1647	1008	0	MT-DLOOP	D-LOOP	0	0	1	1
167	2710	0	C	2708	A	1	0	1	0.04	1	0	1	2708	1699	1009	1	0	1	0	0	0	1699	1009	0	MT-DLOOP	D-LOOP	0	0	1	1
168	2689	0	T	2675	A	9	0	9	0.33	9	0	9	1	1	0	4	1	3	2675	1664	1011	1664	1011	0	MT-DLOOP	D-LOOP	0	0	1	1
169	2744	0	A	2741	G	2	2	0	0.07	2741	1663	1078	1	0	1	2	2	0	0	0	0	1663	1078	0	MT-DLOOP	D-LOOP	0	0	1	1
170	2759	0	C	2755	T	2	0	2	0.07	0	0	0	2755	1649	1106	2	1	1	2	0	2	1649	1106	0	MT-DLOOP	D-LOOP	0	0	1	1
171	2889	0	G	2886	A	2	2	0	0.07	2	2	0	0	0	0	2886	1694	1192	1	0	1	1694	1192	0	MT-DLOOP	D-LOOP	0	0	1	1
172	2967	0	T	2965	C	1	0	1	0.03	0	0	0	1	0	1	1	1	0	2965	1680	1285	1680	1285	0	MT-DLOOP	D-LOOP	0	0	1	1
173	2982	0	T	2980	C	2	0	2	0.07	0	0	0	2	0	2	0	0	0	2980	1692	1288	1692	1288	0	MT-DLOOP	D-LOOP	0	0	1	1
174	3005	0	C	3002	A	1	0	1	0.03	1	0	1	3002	1698	1304	1	0	1	1	0	1	1698	1304	0	MT-DLOOP	D-LOOP	0	0	1	1
175	2957	0	A	2955	G	2	0	2	0.07	2955	1642	1313	0	0	0	2	0	2	0	0	0	1642	1313	0	MT-DLOOP	D-LOOP	0	0	1	1
176	2903	0	A	2903	T	0	0	0	0	2903	1582	1321	0	0	0	0	0	0	0	0	0	1582	1321	0	MT-DLOOP	D-LOOP	0	0	1	1
177	2896	1	T	2896	A	0	0	0	0	0	0	0	0	0	0	0	0	0	2896	1565	1331	1565	1331	0	MT-DLOOP	D-LOOP	0	0	1	1
178	2808	1	A	2805	T	3	1	2	0.11	2805	1477	1328	0	0	0	0	0	0	3	1	2	1477	1328	0	MT-DLOOP	D-LOOP	0	0	1	1
179	2816	0	T	2814	A	1	1	0	0.04	1	1	0	0	0	0	1	1	0	2814	1476	1338	1476	1338	0	MT-DLOOP	D-LOOP	0	0	1	1
180	2803	0	T	2803	A	0	0	0	0	0	0	0	0	0	0	0	0	0	2803	1462	1341	1462	1341	0	MT-DLOOP	D-LOOP	0	0	1	1
181	2809	0	A	2802	T	5	5	0	0.18	2802	1462	1340	2	2	0	0	0	0	5	5	0	1462	1340	0	MT-DLOOP	D-LOOP	0	0	1	1
182	2820	0	C	2819	T	1	1	0	0.04	0	0	0	2819	1473	1346	0	0	0	1	1	0	1473	1346	0	MT-DLOOP	D-LOOP	0	0	1	1
183	2774	0	A	2769	T	3	2	1	0.11	2769	1467	1302	1	1	0	1	1	0	3	2	1	1467	1302	0	MT-DLOOP	D-LOOP	0	0	1	1
184	2865	0	G	2864	T	1	1	0	0.03	0	0	0	0	0	0	2864	1554	1310	1	1	0	1554	1310	0	MT-DLOOP	D-LOOP	0	0	1	1
185	2857	0	G	2853	A	4	3	1	0.14	4	3	1	0	0	0	2853	1550	1303	0	0	0	1550	1303	0	MT-DLOOP	D-LOOP	0	0	1	1
186	2896	0	C	2892	G	2	1	1	0.07	1	0	1	2892	1573	1319	2	1	1	1	1	0	1573	1319	0	MT-DLOOP	D-LOOP	0	0	1	1
187	2895	0	G	2888	A	5	3	2	0.17	5	3	2	1	1	0	2888	1583	1305	1	0	1	1583	1305	0	MT-DLOOP	D-LOOP	0	0	1	1
188	2871	0	A	2864	G	4	3	1	0.14	2864	1565	1299	1	0	1	4	3	1	2	1	1	1565	1299	0	MT-DLOOP	D-LOOP	0	0	1	1
189	2881	0	A	2878	G	2	2	0	0.07	2878	1581	1297	1	1	0	2	2	0	0	0	0	1581	1297	0	MT-DLOOP	D-LOOP	0	0	1	1
190	2923	0	C	2922	A	1	0	1	0.03	1	0	1	2922	1567	1355	0	0	0	0	0	0	1567	1355	0	MT-DLOOP	D-LOOP	0	0	1	1
191	2928	0	A	2928	T	0	0	0	0	2928	1559	1369	0	0	0	0	0	0	0	0	0	1559	1369	0	MT-DLOOP	D-LOOP	0	0	1	1
192	2939	0	T	2936	C	2	1	1	0.07	1	0	1	2	1	1	0	0	0	2936	1566	1370	1566	1370	0	MT-DLOOP	D-LOOP	0	0	1	1
193	3077	0	A	3077	T	0	0	0	0	3077	1568	1509	0	0	0	0	0	0	0	0	0	1568	1509	0	MT-DLOOP	D-LOOP	0	0	1	1
194	3112	0	C	3109	T	2	1	1	0.06	0	0	0	3109	1578	1531	1	0	1	2	1	1	1578	1531	0	MT-DLOOP	D-LOOP	0	0	1	1
195	3105	0	T	3104	A	1	1	0	0.03	1	1	0	0	0	0	0	0	0	3104	1572	1532	1572	1532	0	MT-DLOOP	D-LOOP	0	0	1	1
196	3182	0	T	3179	C	2	0	2	0.06	0	0	0	2	0	2	1	1	0	3179	1577	1602	1577	1602	0	MT-DLOOP	D-LOOP	0	0	1	1
197	3175	0	A	3172	T	2	0	2	0.06	3172	1571	1601	1	0	1	0	0	0	2	0	2	1571	1601	0	MT-DLOOP	D-LOOP	0	0	1	1
198	3238	0	C	3237	A	1	1	0	0.03	1	1	0	3237	1606	1631	0	0	0	0	0	0	1606	1631	0	MT-DLOOP	D-LOOP	0	0	1	1
199	3235	0	T	3234	C	1	1	0	0.03	0	0	0	1	1	0	0	0	0	3234	1597	1637	1597	1637	0	MT-DLOOP	D-LOOP	0	0	1	1
200	3259	0	A	3258	G	1	0	1	0.03	3258	1598	1660	0	0	0	1	0	1	0	0	0	1598	1660	0	MT-DLOOP	D-LOOP	0	0	1	1
201	3262	0	A	3261	T	1	0	1	0.03	3261	1600	1661	0	0	0	0	0	0	1	0	1	1600	1661	0	MT-DLOOP	D-LOOP	0	0	1	1
202	3246	0	A	3244	T	1	1	0	0.03	3244	1580	1664	0	0	0	1	0	1	1	1	0	1580	1664	8	MT-DLOOP	D-LOOP	1	0	1	1
203	3211	0	G	3210	A	1	1	0	0.03	1	1	0	0	0	0	3210	1554	1656	0	0	0	1554	1656	9	MT-DLOOP	D-LOOP	1	0	1	1
204	3218	0	T	3214	A	2	1	1	0.06	2	1	1	1	1	0	1	0	1	3214	1500	1714	1500	1714	10	MT-DLOOP	D-LOOP	1	0	1	1
205	3247	0	G	3244	T	3	1	2	0.09	0	0	0	0	0	0	3244	1525	1719	3	1	2	1525	1719	11	MT-DLOOP	D-LOOP	1	0	1	1
206	3206	0	T	3206	A	0	0	0	0	0	0	0	0	0	0	0	0	0	3206	1481	1725	1481	1725	12	MT-DLOOP	D-LOOP	1	0	1	1
207	3239	0	G	3236	A	2	0	2	0.06	2	0	2	0	0	0	3236	1524	1712	1	0	1	1524	1712	13	MT-DLOOP	D-LOOP	1	0	1	1
208	3285	0	T	3284	C	1	0	1	0.03	0	0	0	1	0	1	0	0	0	3284	1522	1762	1522	1762	14	MT-DLOOP	D-LOOP	1	0	1	1
209	3289	0	T	3287	C	2	0	2	0.06	0	0	0	2	0	2	0	0	0	3287	1527	1760	1527	1760	7	MT-DLOOP	D-LOOP	1	0	1	1
210	3301	0	A	3295	T	5	2	3	0.15	3295	1518	1777	0	0	0	1	1	0	5	2	3	1518	1777	0	MT-DLOOP	D-LOOP	0	0	1	1
211	3314	0	A	3313	T	1	1	0	0.03	3313	1541	1772	0	0	0	0	0	0	1	1	0	1541	1772	0	MT-DLOOP	D-LOOP	0	0	1	1
212	3309	0	T	3307	A	1	1	0	0.03	1	1	0	1	1	0	0	0	0	3307	1537	1770	1537	1770	0	MT-DLOOP	D-LOOP	0	0	1	1
213	3293	0	T	3291	G	2	1	1	0.06	0	0	0	0	0	0	2	1	1	3291	1523	1768	1523	1768	0	MT-DLOOP	D-LOOP	0	0	1	1
214	3216	0	A	3216	T	0	0	0	0	3216	1487	1729	0	0	0	0	0	0	0	0	0	1487	1729	0	MT-DLOOP	D-LOOP	0	0	1	1
215	3219	0	A	3216	T	3	3	0	0.09	3216	1484	1732	0	0	0	0	0	0	3	3	0	1484	1732	0	MT-DLOOP	D-LOOP	0	0	1	1
216	3222	0	T	3221	A	1	1	0	0.03	1	1	0	0	0	0	0	0	0	3221	1486	1735	1486	1735	0	MT-DLOOP	D-LOOP	0	0	1	1
217	3189	0	T	3186	A	2	2	0	0.06	2	2	0	0	0	0	1	1	0	3186	1481	1705	1481	1705	0	MT-DLOOP	D-LOOP	0	0	1	1
218	3141	0	A	3138	T	2	2	0	0.06	3138	1423	1715	0	0	0	1	1	0	2	2	0	1423	1715	0	MT-DLOOP	D-LOOP	0	0	1	1
219	3110	0	A	3109	T	1	1	0	0.03	3109	1416	1693	0	0	0	0	0	0	1	1	0	1416	1693	0	MT-DLOOP	D-LOOP	0	0	1	1
220	3071	0	T	3069	C	2	2	0	0.07	0	0	0	2	2	0	0	0	0	3069	1388	1681	1388	1681	0	MT-DLOOP	D-LOOP	0	0	1	1
221	3056	0	G	3054	T	1	0	1	0.03	0	0	0	1	1	0	3054	1360	1694	1	0	1	1360	1694	0	MT-DLOOP	D-LOOP	0	0	1	1
222	3067	0	C	3064	A	2	1	1	0.07	2	1	1	3064	1376	1688	1	1	0	0	0	0	1376	1688	0	MT-DLOOP	D-LOOP	0	0	1	1
223	3081	0	T	3079	A	1	1	0	0.03	1	1	0	0	0	0	1	1	0	3079	1383	1696	1383	1696	0	MT-DLOOP	D-LOOP	0	0	1	1
224	3078	0	T	3077	G	1	1	0	0.03	0	0	0	0	0	0	1	1	0	3077	1385	1692	1385	1692	0	MT-DLOOP	D-LOOP	0	0	1	1
225	3087	0	G	3085	A	1	1	0	0.03	1	1	0	0	0	0	3085	1379	1706	1	1	0	1379	1706	0	MT-DLOOP	D-LOOP	0	0	1	1
226	3029	0	T	3025	A	2	1	1	0.07	2	1	1	1	1	0	1	1	0	3025	1375	1650	1375	1650	0	MT-DLOOP	D-LOOP	0	0	1	1
227	3045	0	A	3037	C	3	3	0	0.1	3037	1365	1672	3	3	0	3	2	1	2	2	0	1365	1672	0	MT-DLOOP	D-LOOP	0	0	1	1
228	3032	0	G	3031	A	1	1	0	0.03	1	1	0	0	0	0	3031	1352	1679	0	0	0	1352	1679	0	MT-DLOOP	D-LOOP	0	0	1	1
229	2998	0	G	2998	A	0	0	0	0	0	0	0	0	0	0	2998	1360	1638	0	0	0	1360	1638	0	MT-DLOOP	D-LOOP	0	0	1	1
230	2937	0	A	2936	G	1	0	1	0.03	2936	1326	1610	0	0	0	1	0	1	0	0	0	1326	1610	0	MT-DLOOP	D-LOOP	0	0	1	1
231	2975	0	C	2971	T	3	2	1	0.1	1	1	0	2971	1353	1618	0	0	0	3	2	1	1353	1618	0	MT-DLOOP	D-LOOP	0	0	1	1
232	2928	0	A	2926	G	2	0	2	0.07	2926	1284	1642	0	0	0	2	0	2	0	0	0	1284	1642	0	MT-DLOOP	D-LOOP	0	0	1	1
233	2823	0	T	2822	C	1	0	1	0.04	0	0	0	1	0	1	0	0	0	2822	1217	1605	1217	1605	0	MT-DLOOP	D-LOOP	0	0	1	1
234	2866	0	A	2865	G	1	1	0	0.03	2865	1219	1646	0	0	0	1	1	0	0	0	0	1219	1646	0	MT-DLOOP	D-LOOP	0	0	1	1
235	2860	0	A	2859	C	1	1	0	0.03	2859	1224	1635	1	1	0	0	0	0	0	0	0	1224	1635	0	MT-DLOOP	D-LOOP	0	0	1	1
236	2827	0	T	2825	A	1	1	0	0.04	1	1	0	1	0	1	0	0	0	2825	1232	1593	1232	1593	0	MT-DLOOP	D-LOOP	0	0	1	1
237	2865	0	A	2864	G	1	1	0	0.03	2864	1238	1626	0	0	0	1	1	0	0	0	0	1238	1626	0	MT-DLOOP	D-LOOP	0	0	1	1
238	2855	0	A	2854	G	1	1	0	0.04	2854	1235	1619	0	0	0	1	1	0	0	0	0	1235	1619	0	MT-DLOOP	D-LOOP	0	0	1	1
239	2953	0	T	2952	C	1	0	1	0.03	0	0	0	1	0	1	0	0	0	2952	1376	1576	1376	1576	0	MT-DLOOP	D-LOOP	0	0	1	1
240	2949	0	A	2948	T	1	0	1	0.03	2948	1346	1602	0	0	0	0	0	0	1	0	1	1346	1602	0	MT-DLOOP	D-LOOP	0	0	1	1
241	2896	0	A	2896	T	0	0	0	0	2896	1325	1571	0	0	0	0	0	0	0	0	0	1325	1571	0	MT-DLOOP	D-LOOP	0	0	1	1
242	2907	0	C	2906	T	1	1	0	0.03	0	0	0	2906	1328	1578	0	0	0	1	1	0	1328	1578	0	MT-DLOOP	D-LOOP	0	0	1	1
243	2897	0	A	2897	T	0	0	0	0	2897	1319	1578	0	0	0	0	0	0	0	0	0	1319	1578	0	MT-DLOOP	D-LOOP	0	0	1	1
244	2856	0	A	2856	T	0	0	0	0	2856	1289	1567	0	0	0	0	0	0	0	0	0	1289	1567	0	MT-DLOOP	D-LOOP	0	0	1	1
245	2832	0	T	2831	G	1	0	1	0.04	0	0	0	0	0	0	1	0	1	2831	1254	1577	1254	1577	0	MT-DLOOP	D-LOOP	0	0	1	1
246	2779	0	T	2779	A	0	0	0	0	0	0	0	0	0	0	0	0	0	2779	1246	1533	1246	1533	0	MT-DLOOP	D-LOOP	0	0	1	1
247	2792	0	G	2791	A	1	1	0	0.04	1	1	0	0	0	0	2791	1240	1551	0	0	0	1240	1551	0	MT-DLOOP	D-LOOP	0	0	1	1
248	2784	0	A	2783	G	1	1	0	0.04	2783	1228	1555	0	0	0	1	1	0	0	0	0	1228	1555	0	MT-DLOOP	D-LOOP	0	0	1	1
249	2767	0	A	2766	T	1	1	0	0.04	2766	1221	1545	0	0	0	0	0	0	1	1	0	1221	1545	0	MT-DLOOP	D-LOOP	0	0	1	1
250	2730	0	T	2724	C	6	5	1	0.22	0	0	0	6	5	1	0	0	0	2724	1229	1495	1229	1495	0	MT-DLOOP	D-LOOP	0	0	1	1
251	2731	0	G	2728	T	2	1	1	0.07	1	0	1	0	0	0	2728	1234	1494	2	1	1	1234	1494	0	MT-DLOOP	D-LOOP	0	0	1	1
252	2734	0	T	2733	G	1	1	0	0.04	0	0	0	0	0	0	1	1	0	2733	1248	1485	1248	1485	0	MT-DLOOP	D-LOOP	0	0	1	1
253	2775	0	C	2774	A	1	0	1	0.04	1	0	1	2774	1269	1505	0	0	0	0	0	0	1269	1505	0	MT-DLOOP	D-LOOP	0	0	1	1
254	2831	0	T	2831	A	0	0	0	0	0	0	0	0	0	0	0	0	0	2831	1362	1469	1362	1469	0	MT-DLOOP	D-LOOP	0	0	1	1
255	2814	0	G	2812	A	1	0	1	0.04	1	0	1	0	0	0	2812	1366	1446	1	1	0	1366	1446	0	MT-DLOOP	D-LOOP	0	0	1	1
256	2685	0	C	2684	A	1	1	0	0.04	1	1	0	2684	1336	1348	0	0	0	0	0	0	1336	1348	0	MT-DLOOP	D-LOOP	0	0	1	1
257	2592	0	A	2588	C	2	1	1	0.08	2588	1332	1256	2	1	1	1	1	0	1	0	1	1332	1256	0	MT-DLOOP	D-LOOP	0	0	1	1
258	2731	0	C	2728	A	2	2	0	0.07	2	2	0	2728	1397	1331	1	1	0	0	0	0	1397	1331	0	MT-DLOOP	D-LOOP	0	0	1	1
259	2783	0	A	2711	C	41	41	0	1.47	2711	1393	1318	41	41	0	5	4	1	26	26	0	1393	1318	0	MT-DLOOP	D-LOOP	0	0	1	1
260	2957	0	G	2946	T	8	8	0	0.27	3	3	0	0	0	0	2946	1625	1321	8	8	0	1625	1321	0	MT-DLOOP	D-LOOP	0	0	1	1
261	3321	0	C	3319	T	2	2	0	0.06	0	0	0	3319	2005	1314	0	0	0	2	2	0	2005	1314	0	MT-DLOOP	D-LOOP	0	0	1	1
262	3288	0	C	3283	A	3	3	0	0.09	3	3	0	3283	1988	1295	0	0	0	2	1	1	1988	1295	0	MT-DLOOP	D-LOOP	0	0	1	1
263	3278	0	G	3274	A	4	1	3	0.12	4	1	3	0	0	0	3274	1999	1275	0	0	0	1999	1275	0	MT-DLOOP	D-LOOP	0	0	1	1
264	3186	0	C	3181	A	4	4	0	0.13	4	4	0	3181	1990	1191	0	0	0	1	0	1	1990	1191	0	MT-DLOOP	D-LOOP	0	0	1	1
265	3167	0	T	3149	G	9	3	6	0.28	3	0	3	6	3	3	9	3	6	3149	1992	1157	1992	1157	0	MT-DLOOP	D-LOOP	0	0	1	1
266	3094	0	T	3091	A	2	2	0	0.06	2	2	0	1	1	0	0	0	0	3091	1961	1130	1961	1130	0	MT-DLOOP	D-LOOP	0	0	1	1
267	3058	0	T	3052	C	4	3	1	0.13	2	2	0	4	3	1	0	0	0	3052	1927	1125	1927	1125	0	MT-DLOOP	D-LOOP	0	0	1	1
268	3149	0	C	3145	T	4	3	1	0.13	0	0	0	3145	1939	1206	0	0	0	4	3	1	1939	1206	8	MT-DLOOP	D-LOOP	1	0	1	1
269	3075	0	C	3073	A	1	1	0	0.03	1	1	0	3073	1951	1122	0	0	0	1	1	0	1951	1122	9	MT-DLOOP	D-LOOP	1	0	1	1
270	3011	0	A	3008	T	2	2	0	0.07	3008	1950	1058	0	0	0	1	1	0	2	2	0	1950	1058	10	MT-DLOOP	D-LOOP	1	0	1	1
271	2986	0	C	2985	G	1	1	0	0.03	0	0	0	2985	1945	1040	1	1	0	0	0	0	1945	1040	11	MT-DLOOP	D-LOOP	1	0	1	1
272	2875	0	A	2873	T	1	1	0	0.03	2873	1940	933	1	1	0	0	0	0	1	1	0	1940	933	12	MT-DLOOP	D-LOOP	1	0	1	1
273	2959	0	C	2959	A	0	0	0	0	0	0	0	2959	1966	993	0	0	0	0	0	0	1966	993	13	MT-DLOOP	D-LOOP	1	0	1	1
274	2959	0	A	2955	G	4	3	1	0.14	2955	1964	991	0	0	0	4	3	1	0	0	0	1964	991	14	MT-DLOOP	D-LOOP	1	0	1	1
275	2989	0	G	2988	C	1	0	1	0.03	0	0	0	1	0	1	2988	1972	1016	0	0	0	1972	1016	7	MT-DLOOP	D-LOOP	1	0	1	1
276	2945	0	A	2942	G	3	1	2	0.1	2942	1962	980	0	0	0	3	1	2	0	0	0	1962	980	0	MT-DLOOP	D-LOOP	0	0	1	1
277	3062	0	C	3061	T	1	0	1	0.03	0	0	0	3061	1968	1093	0	0	0	1	0	1	1968	1093	0	MT-DLOOP	D-LOOP	0	0	1	1
278	3077	0	A	3075	G	2	0	2	0.06	3075	1976	1099	0	0	0	2	0	2	0	0	0	1976	1099	0	MT-DLOOP	D-LOOP	0	0	1	1
279	2990	0	T	2990	A	0	0	0	0	0	0	0	0	0	0	0	0	0	2990	1974	1016	1974	1016	0	MT-DLOOP	D-LOOP	0	0	1	1
280	3080	0	C	3080	A	0	0	0	0	0	0	0	3080	1975	1105	0	0	0	0	0	0	1975	1105	0	MT-DLOOP	D-LOOP	0	0	1	1
281	3097	0	A	3095	T	1	1	0	0.03	3095	1963	1132	0	0	0	1	1	0	1	1	0	1963	1132	0	MT-DLOOP	D-LOOP	0	0	1	1
282	3055	0	T	3054	A	1	0	1	0.03	1	0	1	0	0	0	0	0	0	3054	1958	1096	1958	1096	0	MT-DLOOP	D-LOOP	0	0	1	1
283	3252	0	A	3251	G	1	0	1	0.03	3251	1952	1299	0	0	0	1	0	1	0	0	0	1952	1299	0	MT-DLOOP	D-LOOP	0	0	1	1
284	3079	0	A	3078	C	1	0	1	0.03	3078	1862	1216	1	0	1	0	0	0	0	0	0	1862	1216	0	MT-DLOOP	D-LOOP	0	0	1	1
285	3082	0	C	3081	A	1	0	1	0.03	1	0	1	3081	1878	1203	0	0	0	0	0	0	1878	1203	2	MT-DLOOP	D-LOOP	1	0	1	1
286	3174	21	A	3174	T	0	0	0	0	3174	1871	1303	0	0	0	0	0	0	0	0	0	1871	1303	2	MT-DLOOP	D-LOOP	1	0	1	1
287	3185	0	A	3185	T	0	0	0	0	3185	1867	1318	0	0	0	0	0	0	0	0	0	1867	1318	2	MT-DLOOP	D-LOOP	1	0	1	1
288	3261	0	A	3261	T	0	0	0	0	3261	1872	1389	0	0	0	0	0	0	0	0	0	1872	1389	4	MT-DLOOP	D-LOOP	1	0	1	1
289	3251	0	A	3250	G	1	0	1	0.03	3250	1872	1378	0	0	0	1	0	1	0	0	0	1872	1378	3	MT-DLOOP	D-LOOP	1	0	1	1
290	2974	0	A	2973	G	1	0	1	0.03	2973	1868	1105	0	0	0	1	0	1	0	0	0	1868	1105	1	MT-DLOOP	D-LOOP	1	0	1	1
291	2653	0	A	2649	C	3	1	2	0.11	2649	1853	796	3	1	2	0	0	0	1	0	1	1853	796	1	MT-DLOOP	D-LOOP	1	0	1	1
292	3150	1	C	2706	T	437	223	214	13.87	7	7	0	2706	1624	1082	0	0	0	437	223	214	1624	1082	1	MT-DLOOP	D-LOOP	1	0	0	0
293	2855	0	T	2848	C	6	6	0	0.21	1	1	0	6	6	0	0	0	0	2848	1845	1003	1845	1003	0	MT-DLOOP	D-LOOP	0	0	1	1
294	2654	0	T	2652	A	1	1	0	0.04	1	1	0	1	0	1	0	0	0	2652	1841	811	1841	811	0	MT-DLOOP	D-LOOP	0	0	1	1
295	3006	0	C	2987	T	18	11	7	0.6	1	0	1	2987	1828	1159	0	0	0	18	11	7	1828	1159	0	MT-DLOOP	D-LOOP	0	0	1	0
296	2822	0	C	2819	T	3	2	1	0.11	0	0	0	2819	1834	985	0	0	0	3	2	1	1834	985	0	MT-DLOOP	D-LOOP	0	0	1	1
297	2346	0	A	2341	C	5	4	1	0.21	2341	1829	512	5	4	1	0	0	0	0	0	0	1829	512	0	MT-DLOOP	D-LOOP	0	0	1	1
298	2866	0	C	2864	A	1	1	0	0.03	1	1	0	2864	1793	1071	0	0	0	1	1	0	1793	1071	0	MT-DLOOP	D-LOOP	0	0	1	1
299	2797	0	C	2796	A	1	0	1	0.04	1	0	1	2796	1800	996	0	0	0	0	0	0	1800	996	0	MT-DLOOP	D-LOOP	0	0	1	1
300	2779	5	A	2776	G	3	0	3	0.11	2776	1796	980	0	0	0	3	0	3	0	0	0	1796	980	0	MT-DLOOP	D-LOOP	0	0	1	1
301	2153	0	A	2153	T	0	0	0	0	2153	1781	372	0	0	0	0	0	0	0	0	0	1781	372	0	MT-DLOOP	D-LOOP	0	0	1	1
302	1994	35	A	1951	C	41	0	41	2.06	1951	1786	165	41	0	41	1	0	1	1	0	1	1786	165	2	MT-DLOOP	D-LOOP	1	0	1	1
303	2831	24	C	2825	A	4	2	2	0.14	4	2	2	2825	1791	1034	1	1	0	1	1	0	1791	1034	2	MT-DLOOP	D-LOOP	1	0	1	1
304	2733	0	C	2731	A	2	2	0	0.07	2	2	0	2731	1773	958	0	0	0	0	0	0	1773	958	2	MT-DLOOP	D-LOOP	1	0	1	1
305	2735	0	C	2734	G	1	1	0	0.04	0	0	0	2734	1781	953	1	1	0	0	0	0	1781	953	2	MT-DLOOP	D-LOOP	1	0	1	1
306	2739	0	C	2737	A	2	1	1	0.07	2	1	1	2737	1787	950	0	0	0	0	0	0	1787	950	3	MT-DLOOP	D-LOOP	1	0	1	1
307	2738	0	C	2737	G	1	0	1	0.04	0	0	0	2737	1805	932	1	0	1	0	0	0	1805	932	1	MT-DLOOP	D-LOOP	1	0	1	1
308	2660	0	C	2659	G	1	0	1	0.04	0	0	0	2659	1803	856	1	0	1	0	0	0	1803	856	1	MT-DLOOP	D-LOOP	1	0	1	1
309	2332	0	C	2297	T	33	33	0	1.42	2	0	2	2297	1770	527	0	0	0	33	33	0	1770	527	1	MT-DLOOP	D-LOOP	1	0	1	1
310	1781	5	T	1674	C	106	34	72	5.95	1	1	0	106	34	72	0	0	0	1674	1615	59	1615	59	1	MT-DLOOP	D-LOOP	1	0	0	0
311	2701	2492	C	2701	A	0	0	0	0	0	0	0	2701	1764	937	0	0	0	0	0	0	1764	937	2	MT-DLOOP	D-LOOP	1	0	1	1
312	2715	2	C	2715	A	0	0	0	0	0	0	0	2715	1779	936	0	0	0	0	0	0	1779	936	5	MT-DLOOP	D-LOOP	1	0	1	1
313	2718	1	C	2718	A	0	0	0	0	0	0	0	2718	1787	931	0	0	0	0	0	0	1787	931	4	MT-DLOOP	D-LOOP	1	0	1	1
314	2728	3	C	2728	A	0	0	0	0	0	0	0	2728	1803	925	0	0	0	0	0	0	1803	925	3	MT-DLOOP	D-LOOP	1	0	1	1
315	2699	1	C	2699	A	0	0	0	0	0	0	0	2699	1790	909	0	0	0	0	0	0	1790	909	1	MT-DLOOP	D-LOOP	1	0	1	1
316	2333	3	G	2320	C	13	10	3	0.56	0	0	0	13	10	3	2320	1431	889	0	0	0	1431	889	1	MT-DLOOP	D-LOOP	1	0	1	1
317	2569	0	C	2565	G	4	3	1	0.16	0	0	0	2565	1660	905	4	3	1	0	0	0	1660	905	0	MT-DLOOP	D-LOOP	0	0	1	1
318	2163	0	T	2151	G	10	0	10	0.46	0	0	0	2	2	0	10	0	10	2151	1257	894	1257	894	0	MT-DLOOP	D-LOOP	0	0	1	1
319	2332	0	T	2332	A	0	0	0	0	0	0	0	0	0	0	0	0	0	2332	1448	884	1448	884	0	MT-DLOOP	D-LOOP	0	0	1	1
320	2548	0	C	2546	A	1	1	0	0.04	1	1	0	2546	1641	905	0	0	0	1	1	0	1641	905	0	MT-DLOOP	D-LOOP	0	0	1	1
321	2524	0	T	2521	C	3	2	1	0.12	0	0	0	3	2	1	0	0	0	2521	1618	903	1618	903	0	MT-DLOOP	D-LOOP	0	0	1	1
322	2467	0	G	2466	T	1	0	1	0.04	0	0	0	0	0	0	2466	1568	898	1	0	1	1568	898	0	MT-DLOOP	D-LOOP	0	0	1	1
323	2556	0	G	2555	A	1	0	1	0.04	1	0	1	0	0	0	2555	1672	883	0	0	0	1672	883	0	MT-DLOOP	D-LOOP	0	0	1	1
324	2615	0	C	2613	A	1	1	0	0.04	1	1	0	2613	1741	872	1	0	1	0	0	0	1741	872	0	MT-DLOOP	D-LOOP	0	0	1	1
325	2653	0	C	2652	G	1	1	0	0.04	0	0	0	2652	1778	874	1	1	0	0	0	0	1778	874	0	MT-DLOOP	D-LOOP	0	0	1	1
326	2525	0	A	2522	G	2	1	1	0.08	2522	1654	868	1	1	0	2	1	1	0	0	0	1654	868	0	MT-DLOOP	D-LOOP	0	0	1	1
327	2608	0	C	2606	A	1	1	0	0.04	1	1	0	2606	1728	878	0	0	0	1	1	0	1728	878	0	MT-DLOOP	D-LOOP	0	0	1	1
328	2423	0	A	2422	C	1	1	0	0.04	2422	1531	891	1	1	0	0	0	0	0	0	0	1531	891	0	MT-DLOOP	D-LOOP	0	0	1	1
329	2422	0	G	2421	C	1	0	1	0.04	0	0	0	1	0	1	2421	1531	890	0	0	0	1531	890	0	MT-DLOOP	D-LOOP	0	0	1	1
330	2578	0	C	2578	A	0	0	0	0	0	0	0	2578	1685	893	0	0	0	0	0	0	1685	893	0	MT-DLOOP	D-LOOP	0	0	1	1
331	2428	0	A	2428	T	0	0	0	0	2428	1543	885	0	0	0	0	0	0	0	0	0	1543	885	0	MT-DLOOP	D-LOOP	0	0	1	1
332	2598	0	C	2598	A	0	0	0	0	0	0	0	2598	1698	900	0	0	0	0	0	0	1698	900	0	MT-DLOOP	D-LOOP	0	0	1	1
333	2467	0	T	2466	G	1	0	1	0.04	0	0	0	0	0	0	1	0	1	2466	1557	909	1557	909	0	MT-DLOOP	D-LOOP	0	0	1	1
334	2591	0	T	2590	A	1	0	1	0.04	1	0	1	0	0	0	0	0	0	2590	1656	934	1656	934	0	MT-DLOOP	D-LOOP	0	0	1	1
335	2561	0	A	2559	T	1	0	1	0.04	2559	1619	940	0	0	0	1	1	0	1	0	1	1619	940	0	MT-DLOOP	D-LOOP	0	0	1	1
336	2651	0	A	2649	C	1	0	1	0.04	2649	1709	940	1	0	1	1	1	0	0	0	0	1709	940	0	MT-DLOOP	D-LOOP	0	0	1	1
337	2677	0	A	2676	T	1	0	1	0.04	2676	1741	935	0	0	0	0	0	0	1	0	1	1741	935	0	MT-DLOOP	D-LOOP	0	0	1	1
338	2504	0	C	2503	G	1	0	1	0.04	0	0	0	2503	1557	946	1	0	1	0	0	0	1557	946	0	MT-DLOOP	D-LOOP	0	0	1	1
339	2422	0	A	2422	T	0	0	0	0	2422	1506	916	0	0	0	0	0	0	0	0	0	1506	916	0	MT-DLOOP	D-LOOP	0	0	1	1
340	2471	0	C	2470	A	1	1	0	0.04	1	1	0	2470	1516	954	0	0	0	0	0	0	1516	954	0	MT-DLOOP	D-LOOP	0	0	1	1
341	2392	0	A	2392	T	0	0	0	0	2392	1446	946	0	0	0	0	0	0	0	0	0	1446	946	0	MT-DLOOP	D-LOOP	0	0	1	1
342	2309	0	T	2309	A	0	0	0	0	0	0	0	0	0	0	0	0	0	2309	1377	932	1377	932	0	MT-DLOOP	D-LOOP	0	0	1	1
343	2442	0	C	2441	G	1	1	0	0.04	0	0	0	2441	1492	949	1	1	0	0	0	0	1492	949	0	MT-DLOOP	D-LOOP	0	0	1	1
344	2343	0	T	2342	A	1	1	0	0.04	1	1	0	0	0	0	0	0	0	2342	1417	925	1417	925	0	MT-DLOOP	D-LOOP	0	0	1	1
345	2455	0	C	2455	A	0	0	0	0	0	0	0	2455	1503	952	0	0	0	0	0	0	1503	952	0	MT-DLOOP	D-LOOP	0	0	1	1
346	2331	0	T	2330	C	1	1	0	0.04	0	0	0	1	1	0	0	0	0	2330	1374	956	1374	956	0	MT-DLOOP	D-LOOP	0	0	1	1
347	2256	0	G	2254	T	1	0	1	0.04	0	0	0	1	1	0	2254	1296	958	1	0	1	1296	958	0	MT-DLOOP	D-LOOP	0	0	1	1
348	2475	0	C	2472	A	2	1	1	0.08	2	1	1	2472	1525	947	1	0	1	0	0	0	1525	947	0	MT-DLOOP	D-LOOP	0	0	1	1
349	2526	0	C	2525	G	1	1	0	0.04	0	0	0	2525	1574	951	1	1	0	0	0	0	1574	951	0	MT-DLOOP	D-LOOP	0	0	1	1
350	2279	0	A	2277	C	1	1	0	0.04	2277	1327	950	1	1	0	1	0	1	0	0	0	1327	950	0	MT-DLOOP	D-LOOP	0	0	1	1
351	2355	0	A	2355	T	0	0	0	0	2355	1405	950	0	0	0	0	0	0	0	0	0	1405	950	0	MT-DLOOP	D-LOOP	0	0	1	1
352	2370	0	A	2368	C	2	1	1	0.08	2368	1438	930	2	1	1	0	0	0	0	0	0	1438	930	2	MT-DLOOP	D-LOOP	1	0	1	1
353	2288	0	C	2288	A	0	0	0	0	0	0	0	2288	1331	957	0	0	0	0	0	0	1331	957	6	MT-DLOOP	D-LOOP	1	0	1	1
354	2302	0	C	2301	A	1	0	1	0.04	1	0	1	2301	1346	955	0	0	0	0	0	0	1346	955	5	MT-DLOOP	D-LOOP	1	0	1	1
355	2301	0	C	2301	A	0	0	0	0	0	0	0	2301	1338	963	0	0	0	0	0	0	1338	963	4	MT-DLOOP	D-LOOP	1	0	1	1
356	2342	0	C	2342	A	0	0	0	0	0	0	0	2342	1370	972	0	0	0	0	0	0	1370	972	2	MT-DLOOP	D-LOOP	1	0	1	1
357	2175	0	A	2170	G	3	1	2	0.14	2170	1183	987	1	0	1	3	1	2	1	1	0	1183	987	2	MT-DLOOP	D-LOOP	1	0	1	1
358	2149	0	A	2147	T	1	1	0	0.05	2147	1116	1031	1	1	0	0	0	0	1	1	0	1116	1031	5	MT-DLOOP	D-LOOP	1	0	1	1
359	2026	0	A	2026	T	0	0	0	0	2026	992	1034	0	0	0	0	0	0	0	0	0	992	1034	4	MT-DLOOP	D-LOOP	1	0	1	1
360	1698	0	A	1698	T	0	0	0	0	1698	660	1038	0	0	0	0	0	0	0	0	0	660	1038	3	MT-DLOOP	D-LOOP	1	0	1	1
361	1673	0	A	1672	C	1	0	1	0.06	1672	644	1028	1	0	1	0	0	0	0	0	0	644	1028	1	MT-DLOOP	D-LOOP	1	0	1	1
362	1640	0	C	1638	T	1	0	1	0.06	0	0	0	1638	606	1032	1	1	0	1	0	1	606	1032	1	MT-DLOOP	D-LOOP	1	0	1	1
363	1624	0	A	1624	T	0	0	0	0	1624	607	1017	0	0	0	0	0	0	0	0	0	607	1017	0	MT-DLOOP	D-LOOP	0	0	1	1
364	1645	0	A	1645	T	0	0	0	0	1645	617	1028	0	0	0	0	0	0	0	0	0	617	1028	0	MT-DLOOP	D-LOOP	0	0	1	1
365	1638	0	A	1636	G	2	1	1	0.12	1636	607	1029	0	0	0	2	1	1	0	0	0	607	1029	0	MT-DLOOP	D-LOOP	0	0	1	1
366	1572	0	G	1572	A	0	0	0	0	0	0	0	0	0	0	1572	568	1004	0	0	0	568	1004	0	MT-DLOOP	D-LOOP	0	0	1	1
367	1508	0	A	1508	T	0	0	0	0	1508	584	924	0	0	0	0	0	0	0	0	0	584	924	0	MT-DLOOP	D-LOOP	0	0	1	1
368	1483	0	A	1481	G	2	2	0	0.13	1481	577	904	0	0	0	2	2	0	0	0	0	577	904	0	MT-DLOOP	D-LOOP	0	0	1	1
369	1504	0	C	1502	A	2	2	0	0.13	2	2	0	1502	570	932	0	0	0	0	0	0	570	932	0	MT-DLOOP	D-LOOP	0	0	1	1
370	1451	0	C	1448	A	2	2	0	0.14	2	2	0	1448	542	906	0	0	0	1	1	0	542	906	0	MT-DLOOP	D-LOOP	0	0	1	1
371	1474	0	C	1470	G	2	2	0	0.14	1	1	0	1470	568	902	2	2	0	1	0	1	568	902	0	MT-DLOOP	D-LOOP	0	0	1	1
372	1413	0	T	1410	A	2	1	1	0.14	2	1	1	1	0	1	0	0	0	1410	542	868	542	868	0	MT-DLOOP	D-LOOP	0	0	1	1
373	1401	0	A	1401	T	0	0	0	0	1401	541	860	0	0	0	0	0	0	0	0	0	541	860	0	MT-DLOOP	D-LOOP	0	0	1	1
374	1348	0	A	1347	G	1	1	0	0.07	1347	540	807	0	0	0	1	1	0	0	0	0	540	807	0	MT-DLOOP	D-LOOP	0	0	1	1
375	1356	0	C	1356	A	0	0	0	0	0	0	0	1356	551	805	0	0	0	0	0	0	551	805	0	MT-DLOOP	D-LOOP	0	0	1	1
376	1218	0	A	1217	T	1	0	1	0.08	1217	556	661	0	0	0	0	0	0	1	0	1	556	661	0	MT-DLOOP	D-LOOP	0	0	1	1
377	1243	0	C	1243	A	0	0	0	0	0	0	0	1243	548	695	0	0	0	0	0	0	548	695	0	MT-DLOOP	D-LOOP	0	0	1	1
378	1228	0	C	1225	T	2	1	1	0.16	0	0	0	1225	537	688	1	1	0	2	1	1	537	688	0	MT-DLOOP	D-LOOP	0	0	1	1
379	1224	0	A	1223	T	1	0	1	0.08	1223	533	690	0	0	0	0	0	0	1	0	1	533	690	0	MT-DLOOP	D-LOOP	0	0	1	1
380	1208	0	G	1206	A	1	1	0	0.08	1	1	0	0	0	0	1206	535	671	1	0	1	535	671	0	MT-DLOOP	D-LOOP	0	0	1	1
381	1077	0	C	1073	A	2	1	1	0.19	2	1	1	1073	556	517	1	1	0	1	0	1	556	517	0	MT-DLOOP	D-LOOP	0	0	1	1
382	1065	0	C	1062	A	1	1	0	0.09	1	1	0	1062	557	505	1	1	0	1	1	0	557	505	0	MT-DLOOP	D-LOOP	0	0	1	1
383	1031	0	T	1029	A	1	1	0	0.1	1	1	0	0	0	0	1	0	1	1029	548	481	548	481	0	MT-DLOOP	D-LOOP	0	0	1	1
384	1025	0	A	1025	T	0	0	0	0	1025	535	490	0	0	0	0	0	0	0	0	0	535	490	0	MT-DLOOP	D-LOOP	0	0	1	1
385	1008	0	A	1007	T	1	0	1	0.1	1007	515	492	0	0	0	0	0	0	1	0	1	515	492	0	MT-DLOOP	D-LOOP	0	0	1	1
386	1025	0	C	1025	A	0	0	0	0	0	0	0	1025	540	485	0	0	0	0	0	0	540	485	0	MT-DLOOP	D-LOOP	0	0	1	1
387	975	0	C	974	T	1	0	1	0.1	0	0	0	974	565	409	0	0	0	1	0	1	565	409	0	MT-DLOOP	D-LOOP	0	1	1	1
388	958	0	A	958	T	0	0	0	0	958	566	392	0	0	0	0	0	0	0	0	0	566	392	0	MT-DLOOP	D-LOOP	0	1	1	1
389	957	0	G	957	A	0	0	0	0	0	0	0	0	0	0	957	566	391	0	0	0	566	391	0	MT-DLOOP	D-LOOP	0	1	1	1
390	946	0	A	943	G	3	1	2	0.32	943	562	381	0	0	0	3	1	2	0	0	0	562	381	0	MT-DLOOP	D-LOOP	0	1	1	1
391	943	0	T	943	A	0	0	0	0	0	0	0	0	0	0	0	0	0	943	561	382	561	382	0	MT-DLOOP	D-LOOP	0	1	1	1
392	958	0	T	958	A	0	0	0	0	0	0	0	0	0	0	0	0	0	958	575	383	575	383	0	MT-DLOOP	D-LOOP	0	1	1	1
393	966	0	T	966	A	0	0	0	0	0	0	0	0	0	0	0	0	0	966	581	385	581	385	0	MT-DLOOP	D-LOOP	0	1	1	1
394	976	0	C	975	A	1	0	1	0.1	1	0	1	975	590	385	0	0	0	0	0	0	590	385	0	MT-DLOOP	D-LOOP	0	1	1	1
395	993	0	A	993	T	0	0	0	0	993	593	400	0	0	0	0	0	0	0	0	0	593	400	0	MT-DLOOP	D-LOOP	0	1	1	1
396	984	0	A	984	T	0	0	0	0	984	589	395	0	0	0	0	0	0	0	0	0	589	395	0	MT-DLOOP	D-LOOP	0	1	1	1
397	984	0	A	984	T	0	0	0	0	984	588	396	0	0	0	0	0	0	0	0	0	588	396	2	MT-DLOOP	D-LOOP	1	1	1	1
398	973	0	T	973	A	0	0	0	0	0	0	0	0	0	0	0	0	0	973	582	391	582	391	6	MT-DLOOP	D-LOOP	1	1	1	1
399	977	0	T	976	A	1	0	1	0.1	1	0	1	0	0	0	0	0	0	976	584	392	584	392	5	MT-DLOOP	D-LOOP	1	1	1	1
400	996	0	T	995	C	1	0	1	0.1	0	0	0	1	0	1	0	0	0	995	584	411	584	411	4	MT-DLOOP	D-LOOP	1	1	1	1
401	1006	4	T	1005	G	1	0	1	0.1	0	0	0	0	0	0	1	0	1	1005	583	422	583	422	3	MT-DLOOP	D-LOOP	1	0	1	1
402	1020	0	A	1018	G	2	1	1	0.2	1018	581	437	0	0	0	2	1	1	0	0	0	581	437	1	MT-DLOOP	D-LOOP	1	0	1	1
403	1009	0	T	1009	A	0	0	0	0	0	0	0	0	0	0	0	0	0	1009	572	437	572	437	0	MT-DLOOP	D-LOOP	0	0	1	1
404	1024	0	C	1023	T	1	0	1	0.1	0	0	0	1023	577	446	0	0	0	1	0	1	577	446	2	MT-DLOOP	D-LOOP	1	0	1	1
405	1014	1	T	1013	C	1	1	0	0.1	0	0	0	1	1	0	0	0	0	1013	569	444	569	444	6	MT-DLOOP	D-LOOP	1	0	1	1
406	1012	0	T	1011	C	1	1	0	0.1	0	0	0	1	1	0	0	0	0	1011	564	447	564	447	5	MT-DLOOP	D-LOOP	1	0	1	1
407	1017	2	T	1017	A	0	0	0	0	0	0	0	0	0	0	0	0	0	1017	558	459	558	459	4	MT-DLOOP	D-LOOP	1	0	1	1
408	1023	0	T	1022	C	1	1	0	0.1	0	0	0	1	1	0	0	0	0	1022	555	467	555	467	3	MT-DLOOP	D-LOOP	1	0	1	1
409	1013	0	G	1011	A	1	1	0	0.1	1	1	0	1	1	0	1011	544	467	0	0	0	544	467	1	MT-DLOOP	D-LOOP	1	0	1	1
410	1008	0	G	1006	C	2	1	1	0.2	0	0	0	2	1	1	1006	550	456	0	0	0	550	456	0	MT-DLOOP	D-LOOP	0	0	1	1
411	985	0	C	978	T	5	4	1	0.51	2	2	0	978	549	429	0	0	0	5	4	1	549	429	0	MT-DLOOP	D-LOOP	0	1	1	1
412	978	0	G	978	A	0	0	0	0	0	0	0	0	0	0	978	544	434	0	0	0	544	434	0	MT-DLOOP	D-LOOP	0	1	1	1
413	962	0	G	960	A	2	2	0	0.21	2	2	0	0	0	0	960	526	434	0	0	0	526	434	0	MT-DLOOP	D-LOOP	0	1	1	1
414	950	0	T	948	A	1	0	1	0.11	1	0	1	1	0	1	0	0	0	948	491	457	491	457	0	MT-DLOOP	D-LOOP	0	1	1	1
415	977	0	A	971	C	3	2	1	0.31	971	507	464	3	2	1	2	0	2	1	0	1	507	464	0	MT-DLOOP	D-LOOP	0	1	1	1
416	1002	0	T	999	G	2	2	0	0.2	1	0	1	0	0	0	2	2	0	999	533	466	533	466	0	MT-DLOOP	D-LOOP	0	0	1	1
417	1040	0	G	1040	A	0	0	0	0	0	0	0	0	0	0	1040	563	477	0	0	0	563	477	0	MT-DLOOP	D-LOOP	0	0	1	1
418	1045	0	C	1045	A	0	0	0	0	0	0	0	1045	576	469	0	0	0	0	0	0	576	469	0	MT-DLOOP	D-LOOP	0	0	1	1
419	1007	0	A	1005	T	1	0	1	0.1	1005	577	428	0	0	0	1	1	0	1	0	1	577	428	0	MT-DLOOP	D-LOOP	0	0	1	1
420	1079	0	C	1079	A	0	0	0	0	0	0	0	1079	594	485	0	0	0	0	0	0	594	485	2	MT-DLOOP	D-LOOP	1	0	1	1
421	1098	1	T	1097	C	1	1	0	0.09	0	0	0	1	1	0	0	0	0	1097	617	480	617	480	6	MT-DLOOP	D-LOOP	1	0	1	1
422	1110	0	T	1109	C	1	1	0	0.09	0	0	0	1	1	0	0	0	0	1109	620	489	620	489	5	MT-DLOOP	D-LOOP	1	0	1	1
423	1104	0	T	1104	A	0	0	0	0	0	0	0	0	0	0	0	0	0	1104	615	489	615	489	4	MT-DLOOP	D-LOOP	1	0	1	1
424	1110	0	T	1110	A	0	0	0	0	0	0	0	0	0	0	0	0	0	1110	616	494	616	494	3	MT-DLOOP	D-LOOP	1	0	1	1
425	1107	0	A	1107	T	0	0	0	0	1107	610	497	0	0	0	0	0	0	0	0	0	610	497	1	MT-DLOOP	D-LOOP	1	0	1	1
426	1100	0	A	1100	T	0	0	0	0	1100	600	500	0	0	0	0	0	0	0	0	0	600	500	0	MT-DLOOP	D-LOOP	0	0	1	1
427	1085	0	C	1085	A	0	0	0	0	0	0	0	1085	584	501	0	0	0	0	0	0	584	501	0	MT-DLOOP	D-LOOP	0	0	1	1
428	1062	0	A	1062	T	0	0	0	0	1062	575	487	0	0	0	0	0	0	0	0	0	575	487	0	MT-DLOOP	D-LOOP	0	0	1	1
429	1063	0	G	1063	A	0	0	0	0	0	0	0	0	0	0	1063	576	487	0	0	0	576	487	0	MT-DLOOP	D-LOOP	0	0	1	1
430	1028	0	T	1025	C	2	1	1	0.19	1	1	0	2	1	1	0	0	0	1025	563	462	563	462	0	MT-DLOOP	D-LOOP	0	0	1	1
431	935	0	C	935	A	0	0	0	0	0	0	0	935	571	364	0	0	0	0	0	0	571	364	0	MT-DLOOP	D-LOOP	0	1	1	1
432	657	0	A	657	T	0	0	0	0	657	553	104	0	0	0	0	0	0	0	0	0	553	104	2	MT-DLOOP	D-LOOP	1	1	1	1
433	1039	0	C	1039	A	0	0	0	0	0	0	0	1039	550	489	0	0	0	0	0	0	550	489	2	MT-DLOOP	D-LOOP	1	0	1	1
434	1019	0	C	1017	A	2	1	1	0.2	2	1	1	1017	551	466	0	0	0	0	0	0	551	466	2	MT-DLOOP	D-LOOP	1	0	1	1
435	1022	0	C	1021	G	1	1	0	0.1	0	0	0	1021	556	465	1	1	0	0	0	0	556	465	4	MT-DLOOP	D-LOOP	1	0	1	1
436	1036	0	C	1035	A	1	1	0	0.1	1	1	0	1035	569	466	0	0	0	0	0	0	569	466	3	MT-DLOOP	D-LOOP	1	0	1	1
437	1050	0	C	1049	T	1	1	0	0.1	0	0	0	1049	579	470	0	0	0	1	1	0	579	470	1	MT-DLOOP	D-LOOP	1	0	1	1
438	1048	0	C	1045	G	2	0	2	0.19	1	0	1	1045	579	466	2	0	2	0	0	0	579	466	1	MT-DLOOP	D-LOOP	1	0	1	1
439	1044	0	A	1042	G	2	1	1	0.19	1042	570	472	0	0	0	2	1	1	0	0	0	570	472	1	MT-DLOOP	D-LOOP	1	0	1	1
440	1047	2	A	1046	T	1	0	1	0.1	1046	579	467	0	0	0	0	0	0	1	0	1	579	467	0	MT-DLOOP	D-LOOP	0	0	1	1
441	1072	0	C	1072	A	0	0	0	0	0	0	0	1072	599	473	0	0	0	0	0	0	599	473	0	MT-DLOOP	D-LOOP	0	0	1	1
442	1072	0	T	1072	A	0	0	0	0	0	0	0	0	0	0	0	0	0	1072	601	471	601	471	0	MT-DLOOP	D-LOOP	0	0	1	1
443	1070	0	A	1070	T	0	0	0	0	1070	597	473	0	0	0	0	0	0	0	0	0	597	473	0	MT-DLOOP	D-LOOP	0	0	1	1
444	1066	0	A	1066	T	0	0	0	0	1066	599	467	0	0	0	0	0	0	0	0	0	599	467	0	MT-DLOOP	D-LOOP	0	0	1	1
445	1081	0	C	1080	A	1	1	0	0.09	1	1	0	1080	599	481	0	0	0	0	0	0	599	481	0	MT-DLOOP	D-LOOP	0	0	1	1
446	1059	0	A	1058	G	1	0	1	0.09	1058	594	464	0	0	0	1	0	1	0	0	0	594	464	0	MT-DLOOP	D-LOOP	0	0	1	1
447	1109	0	C	1108	A	1	0	1	0.09	1	0	1	1108	592	516	0	0	0	0	0	0	592	516	0	MT-DLOOP	D-LOOP	0	0	1	1
448	1108	0	A	1105	G	3	0	3	0.27	1105	593	512	0	0	0	3	0	3	0	0	0	593	512	0	MT-DLOOP	D-LOOP	0	0	1	1
449	1123	0	T	1123	A	0	0	0	0	0	0	0	0	0	0	0	0	0	1123	586	537	586	537	0	MT-DLOOP	D-LOOP	0	0	1	1
450	1119	0	T	1118	C	1	0	1	0.09	0	0	0	1	0	1	0	0	0	1118	582	536	582	536	0	MT-DLOOP	D-LOOP	0	0	1	1
451	1120	0	A	1117	C	2	1	1	0.18	1117	588	529	2	1	1	1	0	1	0	0	0	588	529	2	MT-DLOOP	D-LOOP	1	0	1	1
452	1127	0	T	1127	A	0	0	0	0	0	0	0	0	0	0	0	0	0	1127	593	534	593	534	6	MT-DLOOP	D-LOOP	1	0	1	1
453	1127	0	T	1127	A	0	0	0	0	0	0	0	0	0	0	0	0	0	1127	598	529	598	529	5	MT-DLOOP	D-LOOP	1	0	1	1
454	1076	0	T	1076	A	0	0	0	0	0	0	0	0	0	0	0	0	0	1076	601	475	601	475	4	MT-DLOOP	D-LOOP	1	0	1	1
455	999	0	T	998	C	1	0	1	0.1	0	0	0	1	0	1	0	0	0	998	588	410	588	410	2	MT-DLOOP	D-LOOP	1	1	1	1
456	1075	0	C	1075	A	0	0	0	0	0	0	0	1075	541	534	0	0	0	0	0	0	541	534	6	MT-DLOOP	D-LOOP	1	0	1	1
457	1055	0	C	1055	A	0	0	0	0	0	0	0	1055	531	524	0	0	0	0	0	0	531	524	5	MT-DLOOP	D-LOOP	1	0	1	1
458	1059	0	C	1058	A	1	0	1	0.09	1	0	1	1058	535	523	0	0	0	0	0	0	535	523	4	MT-DLOOP	D-LOOP	1	0	1	1
459	1054	0	C	1054	A	0	0	0	0	0	0	0	1054	541	513	0	0	0	0	0	0	541	513	3	MT-DLOOP	D-LOOP	1	0	1	1
460	1001	0	T	1001	A	0	0	0	0	0	0	0	0	0	0	0	0	0	1001	544	457	544	457	1	MT-DLOOP	D-LOOP	1	0	1	1
461	1061	0	C	1060	T	1	0	1	0.09	0	0	0	1060	542	518	0	0	0	1	0	1	542	518	0	MT-DLOOP	D-LOOP	0	0	1	1
462	1069	0	C	1068	T	1	0	1	0.09	0	0	0	1068	537	531	0	0	0	1	0	1	537	531	0	MT-DLOOP	D-LOOP	0	0	1	1
463	1037	0	C	1037	A	0	0	0	0	0	0	0	1037	521	516	0	0	0	0	0	0	521	516	0	MT-DLOOP	D-LOOP	0	0	1	1
464	805	0	A	804	C	1	1	0	0.12	804	505	299	1	1	0	0	0	0	0	0	0	505	299	0	MT-DLOOP	D-LOOP	0	1	1	1
465	1061	0	C	1061	A	0	0	0	0	0	0	0	1061	507	554	0	0	0	0	0	0	507	554	0	MT-DLOOP	D-LOOP	0	0	1	1
466	1010	0	T	1008	A	1	0	1	0.1	1	0	1	1	0	1	0	0	0	1008	503	505	503	505	0	MT-DLOOP	D-LOOP	0	0	1	1
467	1069	0	C	1068	A	1	0	1	0.09	1	0	1	1068	501	567	0	0	0	0	0	0	501	567	0	MT-DLOOP	D-LOOP	0	0	1	1
468	1066	0	C	1066	A	0	0	0	0	0	0	0	1066	497	569	0	0	0	0	0	0	497	569	0	MT-DLOOP	D-LOOP	0	0	1	1
469	1080	0	C	1077	T	2	1	1	0.19	0	0	0	1077	489	588	1	0	1	2	1	1	489	588	0	MT-DLOOP	D-LOOP	0	0	1	1
470	1067	0	A	1063	G	3	0	3	0.28	1063	480	583	1	0	1	3	0	3	0	0	0	480	583	0	MT-DLOOP	D-LOOP	0	0	1	1
471	1025	0	T	1023	A	2	1	1	0.2	2	1	1	0	0	0	0	0	0	1023	452	571	452	571	0	MT-DLOOP	D-LOOP	0	0	1	1
472	1009	0	A	1009	T	0	0	0	0	1009	444	565	0	0	0	0	0	0	0	0	0	444	565	0	MT-DLOOP	D-LOOP	0	0	1	1
473	1038	0	C	1038	A	0	0	0	0	0	0	0	1038	447	591	0	0	0	0	0	0	447	591	0	MT-DLOOP	D-LOOP	0	0	1	1
474	1024	0	T	1023	C	1	0	1	0.1	0	0	0	1	0	1	0	0	0	1023	446	577	446	577	0	MT-DLOOP	D-LOOP	0	0	1	1
475	987	0	A	987	T	0	0	0	0	987	431	556	0	0	0	0	0	0	0	0	0	431	556	0	MT-DLOOP	D-LOOP	0	1	1	1
476	1033	0	C	1033	A	0	0	0	0	0	0	0	1033	430	603	0	0	0	0	0	0	430	603	0	MT-DLOOP	D-LOOP	0	0	1	1
477	1019	0	T	1019	A	0	0	0	0	0	0	0	0	0	0	0	0	0	1019	430	589	430	589	0	MT-DLOOP	D-LOOP	0	0	1	1
478	1019	0	A	1019	T	0	0	0	0	1019	421	598	0	0	0	0	0	0	0	0	0	421	598	0	MT-DLOOP	D-LOOP	0	0	1	1
479	1013	0	A	1012	G	1	0	1	0.1	1012	419	593	0	0	0	1	0	1	0	0	0	419	593	0	MT-DLOOP	D-LOOP	0	0	1	1
480	956	0	T	954	G	2	2	0	0.21	0	0	0	0	0	0	2	2	0	954	414	540	414	540	0	MT-DLOOP	D-LOOP	0	1	1	1
481	993	0	C	991	A	2	2	0	0.2	2	2	0	991	401	590	0	0	0	0	0	0	401	590	0	MT-DLOOP	D-LOOP	0	1	1	1
482	957	0	T	957	A	0	0	0	0	0	0	0	0	0	0	0	0	0	957	406	551	406	551	0	MT-DLOOP	D-LOOP	0	1	1	1
483	997	0	C	997	A	0	0	0	0	0	0	0	997	407	590	0	0	0	0	0	0	407	590	0	MT-DLOOP	D-LOOP	0	1	1	1
484	987	0	A	984	G	3	3	0	0.3	984	400	584	0	0	0	3	3	0	0	0	0	400	584	0	MT-DLOOP	D-LOOP	0	1	1	1
485	962	0	T	959	G	2	2	0	0.21	1	1	0	0	0	0	2	2	0	959	397	562	397	562	0	MT-DLOOP	D-LOOP	0	1	1	1
486	945	0	C	942	A	2	2	0	0.21	2	2	0	942	370	572	1	1	0	0	0	0	370	572	0	MT-DLOOP	D-LOOP	0	1	1	1
487	910	0	A	910	T	0	0	0	0	910	343	567	0	0	0	0	0	0	0	0	0	343	567	0	MT-DLOOP	D-LOOP	0	1	1	1
488	896	0	A	896	T	0	0	0	0	896	338	558	0	0	0	0	0	0	0	0	0	338	558	0	MT-DLOOP	D-LOOP	0	1	1	1
489	883	0	T	883	A	0	0	0	0	0	0	0	0	0	0	0	0	0	883	340	543	340	543	0	MT-DLOOP	D-LOOP	0	1	1	1
490	820	0	A	819	G	1	0	1	0.12	819	336	483	0	0	0	1	0	1	0	0	0	336	483	0	MT-DLOOP	D-LOOP	0	1	1	1
491	880	0	C	880	A	0	0	0	0	0	0	0	880	334	546	0	0	0	0	0	0	334	546	0	MT-DLOOP	D-LOOP	0	1	1	1
492	857	0	A	857	T	0	0	0	0	857	329	528	0	0	0	0	0	0	0	0	0	329	528	0	MT-DLOOP	D-LOOP	0	1	1	1
493	758	0	A	757	G	1	0	1	0.13	757	325	432	0	0	0	1	0	1	0	0	0	325	432	0	MT-DLOOP	D-LOOP	0	1	1	1
494	863	0	C	863	A	0	0	0	0	0	0	0	863	316	547	0	0	0	0	0	0	316	547	0	MT-DLOOP	D-LOOP	0	1	1	1
495	839	0	C	839	A	0	0	0	0	0	0	0	839	310	529	0	0	0	0	0	0	310	529	0	MT-DLOOP	D-LOOP	0	1	1	1
496	817	0	C	816	T	1	1	0	0.12	0	0	0	816	303	513	0	0	0	1	1	0	303	513	0	MT-DLOOP	D-LOOP	0	1	1	1
497	735	0	T	732	C	3	0	3	0.41	0	0	0	3	0	3	0	0	0	732	304	428	304	428	0	MT-DLOOP	D-LOOP	0	1	1	1
498	831	0	C	831	A	0	0	0	0	0	0	0	831	306	525	0	0	0	0	0	0	306	525	0	MT-DLOOP	D-LOOP	0	1	1	1
499	824	0	G	822	A	1	0	1	0.12	1	0	1	0	0	0	822	301	521	1	0	1	301	521	0	MT-DLOOP	D-LOOP	0	1	1	1
500	807	0	C	807	A	0	0	0	0	0	0	0	807	299	508	0	0	0	0	0	0	299	508	0	MT-DLOOP	D-LOOP	0	1	1	1
501	791	0	C	791	A	0	0	0	0	0	0	0	791	294	497	0	0	0	0	0	0	294	497	0	MT-DLOOP	D-LOOP	0	1	1	1
502	778	1	C	777	G	1	1	0	0.13	0	0	0	777	298	479	1	1	0	0	0	0	298	479	0	MT-DLOOP	D-LOOP	0	1	1	1
503	765	0	A	760	G	5	0	5	0.65	760	294	466	0	0	0	5	0	5	0	0	0	294	466	0	MT-DLOOP	D-LOOP	0	1	1	1
504	758	0	T	757	G	1	0	1	0.13	0	0	0	0	0	0	1	0	1	757	294	463	294	463	0	MT-DLOOP	D-LOOP	0	1	1	1
505	759	0	C	759	A	0	0	0	0	0	0	0	759	295	464	0	0	0	0	0	0	295	464	0	MT-DLOOP	D-LOOP	0	1	1	1
506	756	0	C	754	G	2	1	1	0.26	0	0	0	754	294	460	2	1	1	0	0	0	294	460	0	MT-DLOOP	D-LOOP	0	1	1	1
507	734	0	T	733	G	1	0	1	0.14	0	0	0	0	0	0	1	0	1	733	295	438	295	438	0	MT-DLOOP	D-LOOP	0	1	1	1
508	708	0	A	708	T	0	0	0	0	708	293	415	0	0	0	0	0	0	0	0	0	293	415	0	MT-DLOOP	D-LOOP	0	1	1	1
509	733	0	C	733	A	0	0	0	0	0	0	0	733	290	443	0	0	0	0	0	0	290	443	0	MT-DLOOP	D-LOOP	0	1	1	1
510	732	0	C	732	A	0	0	0	0	0	0	0	732	290	442	0	0	0	0	0	0	290	442	0	MT-DLOOP	D-LOOP	0	1	1	1
511	730	0	C	730	A	0	0	0	0	0	0	0	730	290	440	0	0	0	0	0	0	290	440	0	MT-DLOOP	D-LOOP	0	1	1	1
512	727	0	A	727	T	0	0	0	0	727	289	438	0	0	0	0	0	0	0	0	0	289	438	0	MT-DLOOP	D-LOOP	0	1	1	1
513	725	0	G	723	A	2	0	2	0.28	2	0	2	0	0	0	723	288	435	0	0	0	288	435	8	MT-DLOOP	D-LOOP	1	1	1	1
514	701	0	C	700	G	1	0	1	0.14	0	0	0	700	291	409	1	0	1	0	0	0	291	409	8	MT-DLOOP	D-LOOP	1	1	1	1
515	688	0	A	688	T	0	0	0	0	688	290	398	0	0	0	0	0	0	0	0	0	290	398	9	MT-DLOOP	D-LOOP	1	1	1	1
516	663	0	C	663	A	0	0	0	0	0	0	0	663	265	398	0	0	0	0	0	0	265	398	8	MT-DLOOP	D-LOOP	1	1	1	1
517	608	0	A	608	T	0	0	0	0	608	223	385	0	0	0	0	0	0	0	0	0	223	385	9	MT-DLOOP	D-LOOP	1	1	1	1
518	596	0	C	596	A	0	0	0	0	0	0	0	596	209	387	0	0	0	0	0	0	209	387	8	MT-DLOOP	D-LOOP	1	1	1	1
519	581	0	A	581	T	0	0	0	0	581	203	378	0	0	0	0	0	0	0	0	0	203	378	9	MT-DLOOP	D-LOOP	1	1	1	1
520	554	0	C	552	A	1	0	1	0.18	1	0	1	552	175	377	0	0	0	1	0	1	175	377	10	MT-DLOOP	D-LOOP	1	1	1	1
521	511	0	A	511	T	0	0	0	0	511	148	363	0	0	0	0	0	0	0	0	0	148	363	7	MT-DLOOP	D-LOOP	1	1	1	1
522	517	0	C	517	A	0	0	0	0	0	0	0	517	143	374	0	0	0	0	0	0	143	374	12	MT-DLOOP	D-LOOP	1	1	1	1
523	492	0	A	492	T	0	0	0	0	492	142	350	0	0	0	0	0	0	0	0	0	142	350	7	MT-DLOOP	D-LOOP	1	1	1	1
524	507	0	C	507	A	0	0	0	0	0	0	0	507	141	366	0	0	0	0	0	0	141	366	14	MT-DLOOP	D-LOOP	1	1	1	1
525	507	0	C	505	A	2	0	2	0.39	2	0	2	505	141	364	0	0	0	0	0	0	141	364	7	MT-DLOOP	D-LOOP	1	1	1	1
526	502	0	G	501	A	1	0	1	0.2	1	0	1	0	0	0	501	141	360	0	0	0	141	360	0	MT-DLOOP	D-LOOP	0	1	1	1
527	501	0	C	501	A	0	0	0	0	0	0	0	501	141	360	0	0	0	0	0	0	141	360	0	MT-DLOOP	D-LOOP	0	1	1	1
528	492	0	T	491	G	1	0	1	0.2	0	0	0	0	0	0	1	0	1	491	137	354	137	354	0	MT-DLOOP	D-LOOP	0	1	1	1
529	486	0	G	486	A	0	0	0	0	0	0	0	0	0	0	486	132	354	0	0	0	132	354	0	MT-DLOOP	D-LOOP	0	1	1	1
530	484	0	C	484	A	0	0	0	0	0	0	0	484	137	347	0	0	0	0	0	0	137	347	0	MT-DLOOP	D-LOOP	0	1	1	1
531	479	0	T	479	A	0	0	0	0	0	0	0	0	0	0	0	0	0	479	134	345	134	345	0	MT-DLOOP	D-LOOP	0	1	1	1
532	477	0	A	477	T	0	0	0	0	477	133	344	0	0	0	0	0	0	0	0	0	133	344	0	MT-DLOOP	D-LOOP	0	1	1	1
533	470	0	A	470	T	0	0	0	0	470	134	336	0	0	0	0	0	0	0	0	0	134	336	2	MT-DLOOP	D-LOOP	1	1	1	1
534	470	0	C	469	A	1	1	0	0.21	1	1	0	469	132	337	0	0	0	0	0	0	132	337	6	MT-DLOOP	D-LOOP	1	1	1	1
535	452	0	C	450	A	1	1	0	0.22	1	1	0	450	119	331	1	1	0	0	0	0	119	331	5	MT-DLOOP	D-LOOP	1	1	1	1
536	429	0	C	427	A	2	2	0	0.47	2	2	0	427	102	325	0	0	0	0	0	0	102	325	4	MT-DLOOP	D-LOOP	1	1	1	1
537	414	0	C	413	G	1	1	0	0.24	0	0	0	413	93	320	1	1	0	0	0	0	93	320	3	MT-DLOOP	D-LOOP	1	1	1	1
538	398	0	A	397	G	1	0	1	0.25	397	82	315	0	0	0	1	0	1	0	0	0	82	315	1	MT-DLOOP	D-LOOP	1	1	1	1
539	375	0	T	375	A	0	0	0	0	0	0	0	0	0	0	0	0	0	375	75	300	75	300	0	MT-DLOOP	D-LOOP	0	1	1	1
540	337	0	A	336	C	1	1	0	0.3	336	74	262	1	1	0	0	0	0	0	0	0	74	262	2	MT-DLOOP	D-LOOP	1	1	1	1
541	358	0	C	358	A	0	0	0	0	0	0	0	358	57	301	0	0	0	0	0	0	57	301	6	MT-DLOOP	D-LOOP	1	1	1	1
542	354	0	C	354	A	0	0	0	0	0	0	0	354	55	299	0	0	0	0	0	0	55	299	5	MT-DLOOP	D-LOOP	1	1	1	1
543	346	0	C	346	A	0	0	0	0	0	0	0	346	48	298	0	0	0	0	0	0	48	298	4	MT-DLOOP	D-LOOP	1	1	1	1
544	345	1	C	344	A	1	0	1	0.29	1	0	1	344	47	297	0	0	0	0	0	0	47	297	3	MT-DLOOP	D-LOOP	1	1	1	1
545	335	0	G	335	A	0	0	0	0	0	0	0	0	0	0	335	46	289	0	0	0	46	289	1	MT-DLOOP	D-LOOP	1	1	1	1
546	301	0	A	298	G	2	0	2	0.66	298	45	253	1	0	1	2	0	2	0	0	0	45	253	0	MT-DLOOP	D-LOOP	0	1	1	1
547	291	0	A	291	T	0	0	0	0	291	42	249	0	0	0	0	0	0	0	0	0	42	249	0	MT-DLOOP	D-LOOP	0	1	1	1
548	279	0	C	278	A	1	1	0	0.36	1	1	0	278	30	248	0	0	0	0	0	0	30	248	0	MT-DLOOP	D-LOOP	0	1	1	1
549	253	0	C	252	G	1	1	0	0.4	0	0	0	252	29	223	1	1	0	0	0	0	29	223	0	MT-DLOOP	D-LOOP	0	1	1	1
550	252	0	A	252	T	0	0	0	0	252	30	222	0	0	0	0	0	0	0	0	0	30	222	0	MT-DLOOP	D-LOOP	0	1	1	1
551	245	0	A	244	T	1	1	0	0.41	244	22	222	0	0	0	0	0	0	1	1	0	22	222	0	MT-DLOOP	D-LOOP	0	1	1	1
552	240	0	C	240	A	0	0	0	0	0	0	0	240	18	222	0	0	0	0	0	0	18	222	0	MT-DLOOP	D-LOOP	0	1	1	1
553	228	0	C	228	A	0	0	0	0	0	0	0	228	17	211	0	0	0	0	0	0	17	211	0	MT-DLOOP	D-LOOP	0	1	1	1
554	228	0	A	228	T	0	0	0	0	228	16	212	0	0	0	0	0	0	0	0	0	16	212	0	MT-DLOOP	D-LOOP	0	1	1	1
555	225	0	A	225	T	0	0	0	0	225	16	209	0	0	0	0	0	0	0	0	0	16	209	0	MT-DLOOP	D-LOOP	0	1	1	1
556	219	0	A	219	T	0	0	0	0	219	16	203	0	0	0	0	0	0	0	0	0	16	203	2	MT-DLOOP	D-LOOP	1	1	1	1
557	220	0	C	220	A	0	0	0	0	0	0	0	220	16	204	0	0	0	0	0	0	16	204	6	MT-DLOOP	D-LOOP	1	1	1	1
558	173	0	C	173	A	0	0	0	0	0	0	0	173	14	159	0	0	0	0	0	0	14	159	5	MT-DLOOP	D-LOOP	1	1	1	1
559	168	0	C	168	A	0	0	0	0	0	0	0	168	9	159	0	0	0	0	0	0	9	159	4	MT-DLOOP	D-LOOP	1	1	1	1
560	160	0	C	160	A	0	0	0	0	0	0	0	160	7	153	0	0	0	0	0	0	7	153	3	MT-DLOOP	D-LOOP	1	1	1	1
561	156	0	A	153	G	2	0	2	1.28	153	6	147	0	0	0	2	0	2	1	0	1	6	147	1	MT-DLOOP	D-LOOP	1	1	1	1
562	137	0	A	137	T	0	0	0	0	137	5	132	0	0	0	0	0	0	0	0	0	5	132	0	MT-DLOOP	D-LOOP	0	1	1	1
563	133	0	A	133	T	0	0	0	0	133	5	128	0	0	0	0	0	0	0	0	0	5	128	0	MT-DLOOP	D-LOOP	0	1	1	1
564	123	0	G	123	A	0	0	0	0	0	0	0	0	0	0	123	5	118	0	0	0	5	118	0	MT-DLOOP	D-LOOP	0	1	1	1
565	89	0	A	89	T	0	0	0	0	89	5	84	0	0	0	0	0	0	0	0	0	5	84	0	MT-DLOOP	D-LOOP	0	1	1	1
566	90	0	C	90	A	0	0	0	0	0	0	0	90	6	84	0	0	0	0	0	0	6	84	0	MT-DLOOP	D-LOOP	0	1	1	1
567	62	0	A	61	G	1	1	0	1.61	61	5	56	0	0	0	1	1	0	0	0	0	5	56	2	MT-DLOOP	D-LOOP	1	1	1	1
568	75	0	C	75	A	0	0	0	0	0	0	0	75	7	68	0	0	0	0	0	0	7	68	2	MT-DLOOP	D-LOOP	1	1	1	1
569	52	0	C	52	A	0	0	0	0	0	0	0	52	10	42	0	0	0	0	0	0	10	42	2	MT-DLOOP	D-LOOP	1	1	1	1
570	48	0	C	48	A	0	0	0	0	0	0	0	48	11	37	0	0	0	0	0	0	11	37	4	MT-DLOOP	D-LOOP	1	1	1	1
571	60	0	C	59	A	1	0	1	1.67	1	0	1	59	27	32	0	0	0	0	0	0	27	32	3	MT-DLOOP	D-LOOP	1	1	1	1
572	141	0	C	139	G	2	0	2	1.42	0	0	0	139	120	19	2	0	2	0	0	0	120	19	1	MT-DLOOP	D-LOOP	1	1	1	1
573	405	0	C	403	A	2	0	2	0.49	2	0	2	403	384	19	0	0	0	0	0	0	384	19	1	MT-DLOOP	D-LOOP	1	1	1	1
574	413	0	A	409	T	2	0	2	0.48	409	396	13	1	0	1	1	0	1	2	0	2	396	13	1	MT-DLOOP	D-LOOP	1	1	1	1
575	426	0	C	425	T	1	0	1	0.23	0	0	0	425	412	13	0	0	0	1	0	1	412	13	0	MT-DLOOP	D-LOOP	0	1	1	1
576	485	0	A	482	T	3	0	3	0.62	482	470	12	0	0	0	0	0	0	3	0	3	470	12	0	MT-DLOOP	D-LOOP	0	1	1	1
577	842	0	G	840	A	2	1	1	0.24	2	1	1	0	0	0	840	827	13	0	0	0	827	13	0	MT-TF	tRNA	0	1	1	1
578	876	0	T	875	A	1	0	1	0.11	1	0	1	0	0	0	0	0	0	875	862	13	862	13	0	MT-TF	tRNA	0	1	1	1
579	889	0	T	889	A	0	0	0	0	0	0	0	0	0	0	0	0	0	889	876	13	876	13	0	MT-TF	tRNA	0	1	1	1
580	915	0	T	915	A	0	0	0	0	0	0	0	0	0	0	0	0	0	915	902	13	902	13	0	MT-TF	tRNA	0	1	1	1
581	982	0	A	981	G	1	1	0	0.1	981	968	13	0	0	0	1	1	0	0	0	0	968	13	0	MT-TF	tRNA	0	1	1	1
582	1020	0	T	1020	A	0	0	0	0	0	0	0	0	0	0	0	0	0	1020	1007	13	1007	13	0	MT-TF	tRNA	0	0	1	1
583	1085	0	G	1081	A	3	3	0	0.28	3	3	0	0	0	0	1081	1068	13	1	1	0	1068	13	0	MT-TF	tRNA	0	0	1	1
584	1093	0	T	1092	C	1	1	0	0.09	0	0	0	1	1	0	0	0	0	1092	1077	15	1077	15	0	MT-TF	tRNA	0	0	1	1
585	1131	0	A	1130	T	1	1	0	0.09	1130	1115	15	0	0	0	0	0	0	1	1	0	1115	15	0	MT-TF	tRNA	0	0	1	1
586	1178	0	G	1178	A	0	0	0	0	0	0	0	0	0	0	1178	1163	15	0	0	0	1163	15	0	MT-TF	tRNA	0	0	1	1
587	1271	0	C	1271	A	0	0	0	0	0	0	0	1271	1256	15	0	0	0	0	0	0	1256	15	0	MT-TF	tRNA	0	0	1	1
588	1287	0	T	1287	A	0	0	0	0	0	0	0	0	0	0	0	0	0	1287	1266	21	1266	21	0	MT-TF	tRNA	0	0	1	1
589	1297	0	T	1297	A	0	0	0	0	0	0	0	0	0	0	0	0	0	1297	1273	24	1273	24	0	MT-TF	tRNA	0	0	1	1
590	1296	0	A	1295	G	1	1	0	0.08	1295	1273	22	0	0	0	1	1	0	0	0	0	1273	22	0	MT-TF	tRNA	0	0	1	1
591	1311	0	C	1309	T	2	2	0	0.15	0	0	0	1309	1282	27	0	0	0	2	2	0	1282	27	0	MT-TF	tRNA	0	0	1	1
592	1311	0	C	1310	T	1	0	1	0.08	0	0	0	1310	1285	25	0	0	0	1	0	1	1285	25	0	MT-TF	tRNA	0	0	1	1
593	1318	0	T	1315	A	1	1	0	0.08	1	1	0	1	1	0	1	1	0	1315	1283	32	1283	32	0	MT-TF	tRNA	0	0	1	1
594	1340	0	C	1339	A	1	1	0	0.07	1	1	0	1339	1302	37	0	0	0	0	0	0	1302	37	0	MT-TF	tRNA	0	0	1	1
595	1398	0	C	1398	A	0	0	0	0	0	0	0	1398	1335	63	0	0	0	0	0	0	1335	63	0	MT-TF	tRNA	0	0	1	1
596	1403	0	T	1403	A	0	0	0	0	0	0	0	0	0	0	0	0	0	1403	1338	65	1338	65	0	MT-TF	tRNA	0	0	1	1
597	1422	0	C	1421	G	1	1	0	0.07	0	0	0	1421	1356	65	1	1	0	0	0	0	1356	65	0	MT-TF	tRNA	0	0	1	1
598	1428	0	A	1424	G	2	1	1	0.14	1424	1359	65	1	0	1	2	1	1	1	1	0	1359	65	0	MT-TF	tRNA	0	0	1	1
599	1461	0	A	1459	C	1	1	0	0.07	1459	1392	67	1	1	0	1	0	1	0	0	0	1392	67	0	MT-TF	tRNA	0	0	1	1
600	1479	0	A	1478	G	1	1	0	0.07	1478	1395	83	0	0	0	1	1	0	0	0	0	1395	83	0	MT-TF	tRNA	0	0	1	1
601	1498	0	G	1496	T	2	0	2	0.13	0	0	0	0	0	0	1496	1412	84	2	0	2	1412	84	0	MT-TF	tRNA	0	0	1	1
602	1540	0	C	1539	T	1	1	0	0.06	0	0	0	1539	1407	132	0	0	0	1	1	0	1407	132	0	MT-TF	tRNA	0	0	1	1
603	1590	1	A	1589	T	1	0	1	0.06	1589	1442	147	0	0	0	0	0	0	1	0	1	1442	147	0	MT-TF	tRNA	0	0	1	1
604	1612	0	A	1612	T	0	0	0	0	1612	1453	159	0	0	0	0	0	0	0	0	0	1453	159	0	MT-TF	tRNA	0	0	1	1
605	1615	0	T	1615	A	0	0	0	0	0	0	0	0	0	0	0	0	0	1615	1456	159	1456	159	0	MT-TF	tRNA	0	0	1	1
606	1617	0	A	1616	G	1	1	0	0.06	1616	1457	159	0	0	0	1	1	0	0	0	0	1457	159	0	MT-TF	tRNA	0	0	1	1
607	1631	0	C	1630	T	1	1	0	0.06	0	0	0	1630	1459	171	0	0	0	1	1	0	1459	171	0	MT-TF	tRNA	0	0	1	1
608	1648	0	A	1647	T	1	0	1	0.06	1647	1461	186	0	0	0	0	0	0	1	0	1	1461	186	0	MT-TF	tRNA	0	0	1	1
609	1689	0	C	1688	T	1	0	1	0.06	0	0	0	1688	1470	218	0	0	0	1	0	1	1470	218	0	MT-TF	tRNA	0	0	1	1
610	1777	0	T	1776	C	1	0	1	0.06	0	0	0	1	0	1	0	0	0	1776	1482	294	1482	294	0	MT-TF	tRNA	0	0	1	1
611	1851	0	G	1850	T	1	0	1	0.05	0	0	0	0	0	0	1850	1539	311	1	0	1	1539	311	2	MT-TF	tRNA	1	0	1	1
612	1900	0	A	1899	G	1	1	0	0.05	1899	1582	317	0	0	0	1	1	0	0	0	0	1582	317	6	MT-TF	tRNA	1	0	1	1
613	1922	0	A	1919	G	3	1	2	0.16	1919	1596	323	0	0	0	3	1	2	0	0	0	1596	323	5	MT-TF	tRNA	1	0	1	1
614	1936	0	A	1936	T	0	0	0	0	1936	1602	334	0	0	0	0	0	0	0	0	0	1602	334	4	MT-TF	tRNA	1	0	1	1
615	1940	0	A	1939	T	1	0	1	0.05	1939	1604	335	0	0	0	0	0	0	1	0	1	1604	335	3	MT-TF	tRNA	1	0	1	1
616	1969	0	T	1966	C	3	2	1	0.15	0	0	0	3	2	1	0	0	0	1966	1604	362	1604	362	1	MT-TF	tRNA	1	0	1	1
617	2026	0	G	2024	T	2	1	1	0.1	0	0	0	0	0	0	2024	1657	367	2	1	1	1657	367	0	MT-TF	tRNA	0	0	1	1
618	2029	0	T	2027	G	2	2	0	0.1	0	0	0	0	0	0	2	2	0	2027	1652	375	1652	375	0	MT-TF	tRNA	0	0	1	1
619	2040	0	T	2040	A	0	0	0	0	0	0	0	0	0	0	0	0	0	2040	1663	377	1663	377	0	MT-TF	tRNA	0	0	1	1
620	2067	0	T	2067	A	0	0	0	0	0	0	0	0	0	0	0	0	0	2067	1671	396	1671	396	0	MT-TF	tRNA	0	0	1	1
621	2076	0	A	2075	T	1	1	0	0.05	2075	1677	398	0	0	0	0	0	0	1	1	0	1677	398	0	MT-TF	tRNA	0	0	1	1
622	2087	0	G	2087	A	0	0	0	0	0	0	0	0	0	0	2087	1691	396	0	0	0	1691	396	0	MT-TF	tRNA	0	0	1	1
623	2080	0	A	2080	T	0	0	0	0	2080	1693	387	0	0	0	0	0	0	0	0	0	1693	387	0	MT-TF	tRNA	0	0	1	1
624	2140	0	C	2139	A	1	1	0	0.05	1	1	0	2139	1725	414	0	0	0	0	0	0	1725	414	0	MT-TF	tRNA	0	0	1	1
625	2160	0	G	2160	A	0	0	0	0	0	0	0	0	0	0	2160	1725	435	0	0	0	1725	435	0	MT-TF	tRNA	0	0	1	1
626	2192	0	G	2190	A	1	1	0	0.05	1	1	0	0	0	0	2190	1717	473	1	1	0	1717	473	0	MT-TF	tRNA	0	0	1	1
627	2211	0	G	2211	A	0	0	0	0	0	0	0	0	0	0	2211	1735	476	0	0	0	1735	476	0	MT-TF	tRNA	0	0	1	1
628	2228	0	C	2227	T	1	1	0	0.04	0	0	0	2227	1748	479	0	0	0	1	1	0	1748	479	0	MT-TF	tRNA	0	0	1	1
629	2224	0	T	2223	C	1	1	0	0.04	0	0	0	1	1	0	0	0	0	2223	1752	471	1752	471	0	MT-TF	tRNA	0	0	1	1
630	2247	0	C	2247	A	0	0	0	0	0	0	0	2247	1765	482	0	0	0	0	0	0	1765	482	0	MT-TF	tRNA	0	0	1	1
631	2244	0	A	2243	T	1	0	1	0.04	2243	1770	473	0	0	0	0	0	0	1	0	1	1770	473	0	MT-TF	tRNA	0	0	1	1
632	2282	0	C	2282	A	0	0	0	0	0	0	0	2282	1792	490	0	0	0	0	0	0	1792	490	0	MT-TF	tRNA	0	0	1	1
633	2306	0	A	2303	T	1	0	1	0.04	2303	1806	497	1	1	0	1	1	0	1	0	1	1806	497	0	MT-TF	tRNA	0	0	1	1
634	2326	0	T	2325	C	1	1	0	0.04	0	0	0	1	1	0	0	0	0	2325	1806	519	1806	519	0	MT-TF	tRNA	0	0	1	1
635	2331	0	C	2330	T	1	0	1	0.04	0	0	0	2330	1810	520	0	0	0	1	0	1	1810	520	0	MT-TF	tRNA	0	0	1	1
636	2252	0	A	2251	G	1	1	0	0.04	2251	1815	436	0	0	0	1	1	0	0	0	0	1815	436	2	MT-TF	tRNA	1	0	1	1
637	2397	0	C	2395	T	2	2	0	0.08	0	0	0	2395	1816	579	0	0	0	2	2	0	1816	579	6	MT-TF	tRNA	1	0	1	1
638	2403	0	C	2401	T	2	2	0	0.08	0	0	0	2401	1818	583	0	0	0	2	2	0	1818	583	5	MT-TF	tRNA	1	0	1	1
639	2420	0	C	2419	T	1	1	0	0.04	0	0	0	2419	1827	592	0	0	0	1	1	0	1827	592	4	MT-TF	tRNA	1	0	1	1
640	2434	0	C	2432	A	1	1	0	0.04	1	1	0	2432	1837	595	0	0	0	1	1	0	1837	595	3	MT-TF	tRNA	1	0	1	1
641	2440	0	A	2440	T	0	0	0	0	2440	1844	596	0	0	0	0	0	0	0	0	0	1844	596	1	MT-TF	tRNA	1	0	1	1
642	2448	0	T	2448	A	0	0	0	0	0	0	0	0	0	0	0	0	0	2448	1852	596	1852	596	0	MT-TF	tRNA	0	0	1	1
643	2477	0	A	2477	T	0	0	0	0	2477	1876	601	0	0	0	0	0	0	0	0	0	1876	601	0	MT-TF	tRNA	0	0	1	1
644	2485	0	A	2484	G	1	1	0	0.04	2484	1884	600	0	0	0	1	1	0	0	0	0	1884	600	0	MT-TF	tRNA	0	0	1	1
645	2483	0	A	2480	T	2	1	1	0.08	2480	1876	604	1	1	0	0	0	0	2	1	1	1876	604	0	MT-TF	tRNA	0	0	1	1
646	2519	0	C	2518	G	1	0	1	0.04	0	0	0	2518	1902	616	1	0	1	0	0	0	1902	616	0	MT-TF	tRNA	0	0	1	1
647	2533	0	A	2530	G	3	0	3	0.12	2530	1907	623	0	0	0	3	0	3	0	0	0	1907	623	0	MT-TF	tRNA	0	0	1	1
648	2675	0	A	2671	C	4	0	4	0.15	2671	1913	758	4	0	4	0	0	0	0	0	0	1913	758	0	MT-RNR1	rRNA	0	0	1	1
649	2715	0	A	2712	G	2	1	1	0.07	2712	1928	784	0	0	0	2	1	1	1	0	1	1928	784	0	MT-RNR1	rRNA	0	0	1	1
650	2741	0	T	2741	A	0	0	0	0	0	0	0	0	0	0	0	0	0	2741	1946	795	1946	795	0	MT-RNR1	rRNA	0	0	1	1
651	2749	0	A	2747	T	1	0	1	0.04	2747	1945	802	0	0	0	1	0	1	1	0	1	1945	802	0	MT-RNR1	rRNA	0	0	1	1
652	2772	0	G	2772	A	0	0	0	0	0	0	0	0	0	0	2772	1950	822	0	0	0	1950	822	0	MT-RNR1	rRNA	0	0	1	1
653	2853	0	G	2853	A	0	0	0	0	0	0	0	0	0	0	2853	1995	858	0	0	0	1995	858	0	MT-RNR1	rRNA	0	0	1	1
654	2786	0	T	2785	C	1	1	0	0.04	0	0	0	1	1	0	0	0	0	2785	1917	868	1917	868	0	MT-RNR1	rRNA	0	0	1	1
655	2859	0	T	2852	C	5	0	5	0.17	0	0	0	5	0	5	2	0	2	2852	1984	868	1984	868	0	MT-RNR1	rRNA	0	0	1	1
656	2885	1	T	2878	C	5	0	5	0.17	2	0	2	5	0	5	0	0	0	2878	2001	877	2001	877	0	MT-RNR1	rRNA	0	0	1	1
657	2891	0	G	2887	T	2	0	2	0.07	0	0	0	2	0	2	2887	2000	887	2	0	2	2000	887	0	MT-RNR1	rRNA	0	0	1	1
658	2913	0	G	2906	A	5	0	5	0.17	5	0	5	2	0	2	2906	2017	889	0	0	0	2017	889	0	MT-RNR1	rRNA	0	0	1	1
659	2884	0	T	2880	A	2	0	2	0.07	2	0	2	2	0	2	0	0	0	2880	1985	895	1985	895	0	MT-RNR1	rRNA	0	0	1	1
660	3634	0	C	3628	T	5	2	3	0.14	1	1	0	3628	2723	905	0	0	0	5	2	3	2723	905	0	MT-RNR1	rRNA	0	0	1	1
661	4727	1	C	4720	T	5	0	5	0.11	2	0	2	4720	3801	919	0	0	0	5	0	5	3801	919	0	MT-RNR1	rRNA	0	0	1	1
662	5283	2	T	5273	C	5	5	0	0.09	2	1	1	5	5	0	3	0	3	5273	4339	934	4339	934	0	MT-RNR1	rRNA	0	0	1	1
663	5873	0	A	5849	T	17	4	13	0.29	5849	4828	1021	4	0	4	3	3	0	17	4	13	4828	1021	0	MT-RNR1	rRNA	0	0	1	1
664	6145	0	G	6109	C	19	1	18	0.31	0	0	0	19	1	18	6109	5015	1094	17	1	16	5015	1094	0	MT-RNR1	rRNA	0	0	1	1
665	6456	0	C	6433	T	20	1	19	0.31	1	1	0	6433	5320	1113	2	2	0	20	1	19	5320	1113	0	MT-RNR1	rRNA	0	0	1	1
666	7454	3	C	7441	T	11	0	11	0.15	0	0	0	7441	6259	1182	2	2	0	11	0	11	6259	1182	0	MT-RNR1	rRNA	0	0	1	1
667	8054	1	T	8048	C	3	2	1	0.04	0	0	0	3	2	1	3	0	3	8048	6800	1248	6800	1248	0	MT-RNR1	rRNA	0	0	1	1
668	8215	0	T	8209	A	3	0	3	0.04	3	0	3	2	1	1	1	1	0	8209	6883	1326	6883	1326	0	MT-RNR1	rRNA	0	0	1	1
669	8253	0	T	8249	C	3	3	0	0.04	0	0	0	3	3	0	1	1	0	8249	6892	1357	6892	1357	0	MT-RNR1	rRNA	0	0	1	1
670	8383	0	C	8380	A	2	2	0	0.02	2	2	0	8380	6977	1403	0	0	0	1	1	0	6977	1403	0	MT-RNR1	rRNA	0	0	1	1
671	8391	0	T	8385	C	4	4	0	0.05	1	1	0	4	4	0	1	0	1	8385	6969	1416	6969	1416	0	MT-RNR1	rRNA	0	0	1	1
672	8584	0	A	8583	C	1	1	0	0.01	8583	7156	1427	1	1	0	0	0	0	0	0	0	7156	1427	0	MT-RNR1	rRNA	0	0	1	1
673	8455	0	T	8453	A	1	1	0	0.01	1	1	0	1	1	0	0	0	0	8453	7024	1429	7024	1429	0	MT-RNR1	rRNA	0	0	1	1
674	8507	0	T	8507	A	0	0	0	0	0	0	0	0	0	0	0	0	0	8507	7050	1457	7050	1457	0	MT-RNR1	rRNA	0	0	1	1
675	8500	1	A	8496	G	4	4	0	0.05	8496	7036	1460	0	0	0	4	4	0	0	0	0	7036	1460	0	MT-RNR1	rRNA	0	0	1	1
676	8487	0	G	8481	A	5	4	1	0.06	5	4	1	0	0	0	8481	7023	1458	1	1	0	7023	1458	0	MT-RNR1	rRNA	0	0	1	1
677	8539	0	C	8536	A	2	2	0	0.02	2	2	0	8536	7052	1484	0	0	0	1	1	0	7052	1484	0	MT-RNR1	rRNA	0	0	1	1
678	8697	0	T	8692	G	3	0	3	0.03	0	0	0	2	1	1	3	0	3	8692	7149	1543	7149	1543	0	MT-RNR1	rRNA	0	0	1	1
679	8835	0	C	8828	A	3	0	3	0.03	3	0	3	8828	7269	1559	1	1	0	3	3	0	7269	1559	0	MT-RNR1	rRNA	0	0	1	1
680	8805	0	T	8801	G	2	2	0	0.02	1	1	0	1	1	0	2	2	0	8801	7237	1564	7237	1564	0	MT-RNR1	rRNA	0	0	1	1
681	8767	0	T	8761	C	5	2	3	0.06	0	0	0	5	2	3	1	1	0	8761	7195	1566	7195	1566	0	MT-RNR1	rRNA	0	0	1	1
682	8753	0	A	8747	T	4	1	3	0.05	8747	7180	1567	1	1	0	1	1	0	4	1	3	7180	1567	0	MT-RNR1	rRNA	0	0	1	1
683	9018	0	G	9015	A	2	2	0	0.02	2	2	0	1	1	0	9015	7444	1571	0	0	0	7444	1571	0	MT-RNR1	rRNA	0	0	1	1
684	9033	0	T	9030	A	2	2	0	0.02	2	2	0	1	0	1	0	0	0	9030	7464	1566	7464	1566	0	MT-RNR1	rRNA	0	0	1	1
685	9049	0	A	9048	G	1	1	0	0.01	9048	7480	1568	0	0	0	1	1	0	0	0	0	7480	1568	0	MT-RNR1	rRNA	0	0	1	1
686	9078	0	A	9077	G	1	1	0	0.01	9077	7472	1605	0	0	0	1	1	0	0	0	0	7472	1605	0	MT-RNR1	rRNA	0	0	1	1
687	9014	0	G	9014	A	0	0	0	0	0	0	0	0	0	0	9014	7411	1603	0	0	0	7411	1603	0	MT-RNR1	rRNA	0	0	1	1
688	9050	0	A	9048	C	1	1	0	0.01	9048	7447	1601	1	1	0	1	0	1	0	0	0	7447	1601	0	MT-RNR1	rRNA	0	0	1	1
689	9134	0	T	9131	A	1	0	1	0.01	1	0	1	1	1	0	1	0	1	9131	7469	1662	7469	1662	0	MT-RNR1	rRNA	0	0	1	1
690	9361	0	T	9356	C	3	2	1	0.03	2	1	1	3	2	1	0	0	0	9356	7682	1674	7682	1674	0	MT-RNR1	rRNA	0	0	1	1
691	9385	0	A	9379	T	3	0	3	0.03	9379	7711	1668	0	0	0	3	1	2	3	0	3	7711	1668	0	MT-RNR1	rRNA	0	0	1	1
692	9619	0	C	9614	T	4	1	3	0.04	0	0	0	9614	7893	1721	1	1	0	4	1	3	7893	1721	0	MT-RNR1	rRNA	0	0	1	1
693	9608	0	A	9602	G	4	4	0	0.04	9602	7892	1710	0	0	0	4	4	0	2	1	1	7892	1710	0	MT-RNR1	rRNA	0	0	1	1
694	9710	0	C	9708	T	2	2	0	0.02	0	0	0	9708	7921	1787	0	0	0	2	2	0	7921	1787	0	MT-RNR1	rRNA	0	0	1	1
695	9700	0	A	9698	T	1	0	1	0.01	9698	7936	1762	0	0	0	1	1	0	1	0	1	7936	1762	0	MT-RNR1	rRNA	0	0	1	1
696	9792	0	T	9790	A	1	1	0	0.01	1	1	0	1	1	0	0	0	0	9790	7997	1793	7997	1793	0	MT-RNR1	rRNA	0	0	1	1
697	10216	0	G	10196	C	10	2	8	0.1	7	3	4	10	2	8	10196	8039	2157	3	0	3	8039	2157	0	MT-RNR1	rRNA	0	0	1	1
698	10663	0	C	10656	T	4	2	2	0.04	2	2	0	10656	8381	2275	1	1	0	4	2	2	8381	2275	0	MT-RNR1	rRNA	0	0	1	1
699	10856	0	A	10840	G	12	2	10	0.11	10840	8425	2415	4	2	2	12	2	10	0	0	0	8425	2415	0	MT-RNR1	rRNA	0	0	1	1
700	10875	0	A	10868	T	3	0	3	0.03	10868	8458	2410	1	1	0	3	2	1	3	0	3	8458	2410	0	MT-RNR1	rRNA	0	0	1	1
701	10925	0	G	10913	T	8	0	8	0.07	3	2	1	1	0	1	10913	8460	2453	8	0	8	8460	2453	0	MT-RNR1	rRNA	0	0	1	1
702	10967	1	C	10957	T	5	2	3	0.05	0	0	0	10957	8475	2482	5	3	2	5	2	3	8475	2482	0	MT-RNR1	rRNA	0	0	1	1
703	10827	2	A	10817	G	6	0	6	0.06	10817	8505	2312	4	0	4	6	0	6	0	0	0	8505	2312	0	MT-RNR1	rRNA	0	0	1	1
704	10845	0	T	10838	C	5	1	4	0.05	0	0	0	5	1	4	2	0	2	10838	8510	2328	8510	2328	2	MT-RNR1	rRNA	1	0	1	1
705	11328	0	C	11322	A	4	0	4	0.04	4	0	4	11322	8726	2596	0	0	0	2	2	0	8726	2596	6	MT-RNR1	rRNA	1	0	1	1
706	11419	0	C	11414	T	3	0	3	0.03	1	0	1	11414	8774	2640	1	1	0	3	0	3	8774	2640	5	MT-RNR1	rRNA	1	0	1	1
707	11558	0	C	11550	G	4	1	3	0.03	1	0	1	11550	8820	2730	4	1	3	3	2	1	8820	2730	4	MT-RNR1	rRNA	1	0	1	1
708	11605	0	C	11595	A	6	3	3	0.05	6	3	3	11595	8801	2794	0	0	0	4	0	4	8801	2794	3	MT-RNR1	rRNA	1	0	1	1
709	12013	0	G	12002	A	6	5	1	0.05	6	5	1	0	0	0	12002	8987	3015	5	2	3	8987	3015	1	MT-RNR1	rRNA	1	0	1	1
710	11958	0	T	11938	A	10	2	8	0.08	10	2	8	6	3	3	4	0	4	11938	8930	3008	8930	3008	0	MT-RNR1	rRNA	0	0	1	1
711	12019	0	T	12013	G	3	1	2	0.02	1	0	1	2	1	1	3	1	2	12013	8923	3090	8923	3090	0	MT-RNR1	rRNA	0	0	1	1
712	12153	0	C	12149	T	4	1	3	0.03	0	0	0	12149	8919	3230	0	0	0	4	1	3	8919	3230	0	MT-RNR1	rRNA	0	0	1	1
713	12151	0	C	12146	A	2	1	1	0.02	2	1	1	12146	8920	3226	2	1	1	1	0	1	8920	3226	0	MT-RNR1	rRNA	0	0	1	1
714	12277	1	A	12270	T	6	1	5	0.05	12270	8982	3288	0	0	0	1	0	1	6	1	5	8982	3288	0	MT-RNR1	rRNA	0	0	1	1
715	12569	0	G	12562	T	4	1	3	0.03	3	1	2	0	0	0	12562	9193	3369	4	1	3	9193	3369	0	MT-RNR1	rRNA	0	0	1	1
716	12776	0	T	12771	C	3	0	3	0.02	2	2	0	3	0	3	0	0	0	12771	9159	3612	9159	3612	0	MT-RNR1	rRNA	0	0	1	1
717	12862	0	G	12852	C	4	1	3	0.03	3	1	2	4	1	3	12852	9167	3685	3	2	1	9167	3685	0	MT-RNR1	rRNA	0	0	1	1
718	12949	0	A	12946	T	1	0	1	0.01	12946	9167	3779	1	1	0	1	0	1	1	0	1	9167	3779	0	MT-RNR1	rRNA	0	0	1	1
719	13524	0	G	13514	T	6	4	2	0.04	0	0	0	4	1	3	13514	9312	4202	6	4	2	9312	4202	0	MT-RNR1	rRNA	0	0	1	1
720	13636	0	T	13631	A	2	1	1	0.01	2	1	1	2	1	1	1	0	1	13631	9273	4358	9273	4358	0	MT-RNR1	rRNA	0	0	1	1
721	13849	0	T	13836	C	6	3	3	0.04	2	1	1	6	3	3	5	3	2	13836	9376	4460	9376	4460	0	MT-RNR1	rRNA	0	0	1	1
722	14076	0	C	14066	T	6	4	2	0.04	4	0	4	14066	9388	4678	0	0	0	6	4	2	9388	4678	0	MT-RNR1	rRNA	0	0	1	1
723	12656	0	A	12647	G	5	2	3	0.04	12647	9408	3239	0	0	0	5	2	3	4	1	3	9408	3239	0	MT-RNR1	rRNA	0	0	1	1
724	14444	0	C	14442	A	1	0	1	0.01	1	0	1	14442	9371	5071	0	0	0	1	0	1	9371	5071	0	MT-RNR1	rRNA	0	0	1	1
725	14488	0	C	14479	T	8	5	3	0.06	1	1	0	14479	9367	5112	0	0	0	8	5	3	9367	5112	0	MT-RNR1	rRNA	0	0	1	1
726	14649	0	C	14641	T	7	3	4	0.05	0	0	0	14641	9501	5140	1	1	0	7	3	4	9501	5140	0	MT-RNR1	rRNA	0	0	1	1
727	14568	0	T	14561	C	5	2	3	0.03	2	0	2	5	2	3	0	0	0	14561	9536	5025	9536	5025	0	MT-RNR1	rRNA	0	0	1	1
728	14746	0	C	14740	T	3	2	1	0.02	2	2	0	14740	9587	5153	1	1	0	3	2	1	9587	5153	0	MT-RNR1	rRNA	0	0	1	1
729	14820	0	T	14815	C	4	3	1	0.03	1	1	0	4	3	1	0	0	0	14815	9598	5217	9598	5217	0	MT-RNR1	rRNA	0	0	1	1
730	14933	1	A	14923	T	4	3	1	0.03	14923	9598	5325	3	1	2	3	3	0	4	3	1	9598	5325	0	MT-RNR1	rRNA	0	0	1	1
731	14926	0	A	14920	G	3	0	3	0.02	14920	9603	5317	1	1	0	3	0	3	2	2	0	9603	5317	0	MT-RNR1	rRNA	0	0	1	1
732	14853	0	A	14851	T	1	1	0	0.01	14851	9600	5251	0	0	0	1	1	0	1	1	0	9600	5251	0	MT-RNR1	rRNA	0	0	1	1
733	14425	0	T	14421	C	4	3	1	0.03	0	0	0	4	3	1	0	0	0	14421	9589	4832	9589	4832	0	MT-RNR1	rRNA	0	0	1	1
734	14789	0	C	14784	T	4	4	0	0.03	1	1	0	14784	9590	5194	0	0	0	4	4	0	9590	5194	0	MT-RNR1	rRNA	0	0	1	1
735	13808	0	A	13801	T	5	1	4	0.04	13801	9582	4219	2	1	1	0	0	0	5	1	4	9582	4219	0	MT-RNR1	rRNA	0	0	1	1
736	15246	1	C	15241	T	3	1	2	0.02	2	1	1	15241	9860	5381	0	0	0	3	1	2	9860	5381	0	MT-RNR1	rRNA	0	0	1	1
737	15353	0	C	15348	A	2	1	1	0.01	2	1	1	15348	9991	5357	1	1	0	2	2	0	9991	5357	0	MT-RNR1	rRNA	0	0	1	1
738	15232	0	A	15227	G	3	2	1	0.02	15227	9981	5246	1	1	0	3	2	1	1	0	1	9981	5246	0	MT-RNR1	rRNA	0	0	1	1
739	15389	0	C	15383	T	4	4	0	0.03	1	1	0	15383	10022	5361	1	0	1	4	4	0	10022	5361	0	MT-RNR1	rRNA	0	0	1	1
740	15426	0	G	15423	T	2	1	1	0.01	0	0	0	1	0	1	15423	9999	5424	2	1	1	9999	5424	0	MT-RNR1	rRNA	0	0	1	1
741	15385	0	A	15382	G	2	2	0	0.01	15382	9962	5420	0	0	0	2	2	0	1	1	0	9962	5420	0	MT-RNR1	rRNA	0	0	1	1
742	15266	0	T	15263	C	2	1	1	0.01	0	0	0	2	1	1	1	0	1	15263	10042	5221	10042	5221	0	MT-RNR1	rRNA	0	0	1	1
743	15563	0	C	15559	T	2	0	2	0.01	1	0	1	15559	10103	5456	1	0	1	2	0	2	10103	5456	2	MT-RNR1	rRNA	1	0	1	1
744	15672	1	A	15667	G	5	2	3	0.03	15667	10155	5512	0	0	0	5	2	3	0	0	0	10155	5512	6	MT-RNR1	rRNA	1	0	1	1
745	15718	0	A	15714	T	2	0	2	0.01	15714	10200	5514	0	0	0	2	2	0	2	0	2	10200	5514	5	MT-RNR1	rRNA	1	0	1	1
746	15758	0	A	15751	G	4	4	0	0.03	15751	10226	5525	2	0	2	4	4	0	1	0	1	10226	5525	4	MT-RNR1	rRNA	1	0	1	1
747	15726	0	A	15721	T	2	0	2	0.01	15721	10246	5475	1	1	0	2	2	0	2	0	2	10246	5475	3	MT-RNR1	rRNA	1	0	1	1
748	15752	2	G	15741	A	7	6	1	0.04	7	6	1	0	0	0	15741	10358	5383	4	3	1	10358	5383	1	MT-RNR1	rRNA	1	0	1	1
749	15735	0	G	15728	T	3	2	1	0.02	1	0	1	3	3	0	15728	10382	5346	3	2	1	10382	5346	0	MT-RNR1	rRNA	0	0	1	1
750	15641	0	G	15635	A	4	2	2	0.03	4	2	2	1	0	1	15635	10380	5255	1	0	1	10380	5255	0	MT-RNR1	rRNA	0	0	1	1
751	15497	0	A	15487	G	6	2	4	0.04	15487	10291	5196	3	0	3	6	2	4	1	1	0	10291	5196	0	MT-RNR1	rRNA	0	0	1	1
752	15923	0	C	15911	A	6	2	4	0.04	6	2	4	15911	10632	5279	2	0	2	4	3	1	10632	5279	0	MT-RNR1	rRNA	0	0	1	1
753	15941	0	A	15939	G	2	0	2	0.01	15939	10645	5294	0	0	0	2	0	2	0	0	0	10645	5294	0	MT-RNR1	rRNA	0	0	1	1
754	15966	0	A	15963	G	2	0	2	0.01	15963	10658	5305	0	0	0	2	0	2	1	1	0	10658	5305	0	MT-RNR1	rRNA	0	0	1	1
755	15989	0	G	15979	C	4	2	2	0.03	3	2	1	4	2	2	15979	10670	5309	3	2	1	10670	5309	0	MT-RNR1	rRNA	0	0	1	1
756	15948	3	C	15933	A	8	8	0	0.05	8	8	0	15933	10647	5286	4	4	0	3	2	1	10647	5286	0	MT-RNR1	rRNA	0	0	1	1
757	16054	0	A	16045	G	7	6	1	0.04	16045	10780	5265	1	1	0	7	6	1	1	1	0	10780	5265	0	MT-RNR1	rRNA	0	0	1	1
758	16107	0	T	16097	A	7	7	0	0.04	7	7	0	2	2	0	1	0	1	16097	10781	5316	10781	5316	0	MT-RNR1	rRNA	0	0	1	1
759	16542	1	C	16528	T	9	6	3	0.05	1	1	0	16528	11115	5413	4	4	0	9	6	3	11115	5413	0	MT-RNR1	rRNA	0	0	1	1
760	15957	0	A	15931	C	13	12	1	0.08	15931	10493	5438	13	12	1	13	12	1	0	0	0	10493	5438	0	MT-RNR1	rRNA	0	0	1	1
761	14844	0	A	14829	G	8	6	2	0.05	14829	9431	5398	7	6	1	8	6	2	0	0	0	9431	5398	0	MT-RNR1	rRNA	0	0	1	1
762	14320	0	G	14309	C	7	7	0	0.05	4	4	0	7	7	0	14309	8934	5375	0	0	0	8934	5375	0	MT-RNR1	rRNA	0	0	1	1
763	13742	0	C	13715	A	16	14	2	0.12	16	14	2	13715	8463	5252	7	7	0	4	3	1	8463	5252	0	MT-RNR1	rRNA	0	0	1	1
764	13397	0	A	13376	G	15	13	2	0.11	13376	8325	5051	0	0	0	15	13	2	6	3	3	8325	5051	0	MT-RNR1	rRNA	0	0	1	1
765	13269	5	C	13237	G	13	13	0	0.1	10	10	0	13237	7997	5240	13	13	0	9	8	1	7997	5240	0	MT-RNR1	rRNA	0	0	1	1
766	12313	0	G	12289	A	12	9	3	0.1	12	9	3	7	4	3	12289	7088	5201	5	3	2	7088	5201	0	MT-RNR1	rRNA	0	0	1	1
767	11849	0	C	11839	T	4	1	3	0.03	2	0	2	11839	6690	5149	4	2	2	4	1	3	6690	5149	0	MT-RNR1	rRNA	0	0	1	1
768	11867	0	A	11856	G	9	2	7	0.08	11856	6644	5212	2	2	0	9	2	7	0	0	0	6644	5212	0	MT-RNR1	rRNA	0	0	1	1
769	12112	0	G	12105	T	3	3	0	0.02	2	1	1	2	1	1	12105	6647	5458	3	3	0	6647	5458	0	MT-RNR1	rRNA	0	0	1	1
770	11958	0	C	11950	A	4	4	0	0.03	4	4	0	11950	6554	5396	2	1	1	2	2	0	6554	5396	0	MT-RNR1	rRNA	0	0	1	1
771	12058	1	A	12051	G	5	4	1	0.04	12051	6592	5459	0	0	0	5	4	1	2	2	0	6592	5459	0	MT-RNR1	rRNA	0	0	1	1
772	11856	0	A	11850	T	3	1	2	0.03	11850	6311	5539	1	1	0	2	1	1	3	1	2	6311	5539	0	MT-RNR1	rRNA	0	0	1	1
773	11859	0	T	11854	G	3	1	2	0.03	1	1	0	1	0	1	3	1	2	11854	6193	5661	6193	5661	0	MT-RNR1	rRNA	0	0	1	1
774	12041	0	G	12030	A	5	4	1	0.04	5	4	1	1	1	0	12030	6291	5739	5	1	4	6291	5739	0	MT-RNR1	rRNA	0	0	1	1
775	12075	0	C	12066	T	7	2	5	0.06	0	0	0	12066	6305	5761	2	2	0	7	2	5	6305	5761	0	MT-RNR1	rRNA	0	0	1	1
776	12001	4	A	11991	C	4	0	4	0.03	11991	6263	5728	4	0	4	4	0	4	2	1	1	6263	5728	0	MT-RNR1	rRNA	0	0	1	1
777	11689	0	G	11686	A	1	1	0	0.01	1	1	0	1	0	1	11686	5943	5743	1	0	1	5943	5743	0	MT-RNR1	rRNA	0	0	1	1
778	11611	0	C	11604	A	4	2	2	0.03	4	2	2	11604	5931	5673	1	1	0	2	2	0	5931	5673	0	MT-RNR1	rRNA	0	0	1	1
779	11245	0	T	11241	A	3	0	3	0.03	3	0	3	0	0	0	1	0	1	11241	5816	5425	5816	5425	0	MT-RNR1	rRNA	0	0	1	1
780	11596	0	C	11591	A	3	3	0	0.03	3	3	0	11591	5881	5710	0	0	0	2	2	0	5881	5710	2	MT-RNR1	rRNA	1	0	1	1
781	11800	3	A	11794	T	4	1	3	0.03	11794	5908	5886	0	0	0	2	1	1	4	1	3	5908	5886	6	MT-RNR1	rRNA	1	0	1	1
782	11840	0	A	11836	C	2	0	2	0.02	11836	5966	5870	2	0	2	1	1	0	1	0	1	5966	5870	5	MT-RNR1	rRNA	1	0	1	1
783	11513	0	A	11512	G	1	1	0	0.01	11512	5672	5840	0	0	0	1	1	0	0	0	0	5672	5840	4	MT-RNR1	rRNA	1	0	1	1
784	10963	0	A	10962	C	1	1	0	0.01	10962	5596	5366	1	1	0	0	0	0	0	0	0	5596	5366	3	MT-RNR1	rRNA	1	0	1	1
785	11386	0	C	11380	T	3	1	2	0.03	2	2	0	11380	5577	5803	1	0	1	3	1	2	5577	5803	1	MT-RNR1	rRNA	1	0	1	1
786	11370	0	G	11364	C	3	0	3	0.03	1	0	1	3	0	3	11364	5594	5770	2	1	1	5594	5770	0	MT-RNR1	rRNA	0	0	1	1
787	11468	0	C	11463	T	3	1	2	0.03	1	0	1	11463	5632	5831	1	1	0	3	1	2	5632	5831	0	MT-RNR1	rRNA	0	0	1	1
788	11470	0	T	11460	A	7	0	7	0.06	7	0	7	3	0	3	0	0	0	11460	5591	5869	5591	5869	0	MT-RNR1	rRNA	0	0	1	1
789	11386	0	T	11385	A	1	0	1	0.01	1	0	1	0	0	0	0	0	0	11385	5565	5820	5565	5820	0	MT-RNR1	rRNA	0	0	1	1
790	11223	0	A	11218	T	3	1	2	0.03	11218	5358	5860	1	1	0	1	1	0	3	1	2	5358	5860	0	MT-RNR1	rRNA	0	0	1	1
791	11240	0	G	11237	T	2	0	2	0.02	0	0	0	1	1	0	11237	5356	5881	2	0	2	5356	5881	0	MT-RNR1	rRNA	0	0	1	1
792	11195	0	C	11192	T	3	3	0	0.03	0	0	0	11192	5272	5920	0	0	0	3	3	0	5272	5920	0	MT-RNR1	rRNA	0	0	1	1
793	11200	0	C	11193	T	5	1	4	0.04	2	1	1	11193	5315	5878	0	0	0	5	1	4	5315	5878	0	MT-RNR1	rRNA	0	0	1	1
794	11255	0	T	11240	C	10	4	6	0.09	2	1	1	10	4	6	3	0	3	11240	5270	5970	5270	5970	0	MT-RNR1	rRNA	0	0	1	1
795	11291	0	A	11286	T	2	2	0	0.02	11286	5255	6031	1	0	1	2	1	1	2	2	0	5255	6031	0	MT-RNR1	rRNA	0	0	1	1
796	11247	0	G	11229	A	7	2	5	0.06	7	2	5	5	1	4	11229	5227	6002	6	0	6	5227	6002	0	MT-RNR1	rRNA	0	0	1	1
797	10848	0	C	10837	A	7	3	4	0.06	7	3	4	10837	5211	5626	0	0	0	4	3	1	5211	5626	0	MT-RNR1	rRNA	0	0	1	1
798	10457	2	C	10443	G	6	3	3	0.06	4	2	2	10443	4930	5513	6	3	3	4	2	2	4930	5513	0	MT-RNR1	rRNA	0	0	1	1
799	9989	0	A	9981	G	5	2	3	0.05	9981	4873	5108	2	1	1	5	2	3	1	1	0	4873	5108	0	MT-RNR1	rRNA	0	0	1	1
800	10117	0	C	10108	G	6	3	3	0.06	1	0	1	10108	4873	5235	6	3	3	2	1	1	4873	5235	0	MT-RNR1	rRNA	0	0	1	1
801	9391	1	A	9360	G	22	2	20	0.23	9360	4852	4508	8	3	5	22	2	20	1	0	1	4852	4508	2	MT-RNR1	rRNA	1	0	1	1
802	10251	3	C	10237	T	6	2	4	0.06	3	3	0	10237	4785	5452	5	4	1	6	2	4	4785	5452	2	MT-RNR1	rRNA	1	0	1	1
803	10274	0	C	10260	A	8	7	1	0.08	8	7	1	10260	4701	5559	5	2	3	1	0	1	4701	5559	5	MT-RNR1	rRNA	1	0	1	1
804	10340	1	C	10319	A	8	5	3	0.08	8	5	3	10319	4753	5566	6	3	3	7	4	3	4753	5566	4	MT-RNR1	rRNA	1	0	1	1
805	10163	0	C	10150	A	7	1	6	0.07	7	1	6	10150	4587	5563	2	0	2	4	0	4	4587	5563	3	MT-RNR1	rRNA	1	0	1	1
806	10071	1	C	10051	G	11	1	10	0.11	6	1	5	10051	4562	5489	11	1	10	3	1	2	4562	5489	1	MT-RNR1	rRNA	1	0	1	1
807	10086	0	A	10048	G	29	4	25	0.29	10048	4537	5511	3	0	3	29	4	25	6	0	6	4537	5511	1	MT-RNR1	rRNA	1	0	1	1
808	10311	0	C	10296	G	7	4	3	0.07	4	1	3	10296	4811	5485	7	4	3	4	2	2	4811	5485	0	MT-RNR1	rRNA	0	0	1	1
809	10118	0	G	10105	T	8	1	7	0.08	4	2	2	1	1	0	10105	4764	5341	8	1	7	4764	5341	0	MT-RNR1	rRNA	0	0	1	1
810	10204	0	G	10195	A	5	3	2	0.05	5	3	2	2	0	2	10195	4861	5334	2	1	1	4861	5334	0	MT-RNR1	rRNA	0	0	1	1
811	10124	0	G	10119	A	3	2	1	0.03	3	2	1	1	1	0	10119	4911	5208	1	0	1	4911	5208	0	MT-RNR1	rRNA	0	0	1	1
812	10072	0	A	10063	G	7	1	6	0.07	10063	4931	5132	0	0	0	7	1	6	2	0	2	4931	5132	0	MT-RNR1	rRNA	0	0	1	1
813	10078	1	A	10055	G	21	1	20	0.21	10055	4949	5106	1	0	1	21	1	20	1	1	0	4949	5106	0	MT-RNR1	rRNA	0	0	1	1
814	9893	0	A	9883	G	6	1	5	0.06	9883	4905	4978	2	1	1	6	1	5	2	2	0	4905	4978	0	MT-RNR1	rRNA	0	0	1	1
815	9725	0	C	9722	T	3	2	1	0.03	0	0	0	9722	4731	4991	0	0	0	3	2	1	4731	4991	0	MT-RNR1	rRNA	0	0	1	1
816	9432	0	A	9424	C	5	2	3	0.05	9424	4717	4707	5	2	3	3	1	2	0	0	0	4717	4707	0	MT-RNR1	rRNA	0	0	1	1
817	9585	0	G	9575	A	5	1	4	0.05	5	1	4	0	0	0	9575	4753	4822	5	1	4	4753	4822	0	MT-RNR1	rRNA	0	0	1	1
818	9697	0	C	9688	A	4	3	1	0.04	4	3	1	9688	4982	4706	3	2	1	2	2	0	4982	4706	0	MT-RNR1	rRNA	0	0	1	1
819	9177	0	A	9140	G	29	2	27	0.32	9140	4887	4253	4	0	4	29	2	27	4	1	3	4887	4253	0	MT-RNR1	rRNA	0	0	1	1
820	9061	0	G	9046	A	10	3	7	0.11	10	3	7	2	1	1	9046	4941	4105	3	1	2	4941	4105	0	MT-RNR1	rRNA	0	0	1	1
821	8452	0	T	8420	A	19	9	10	0.22	19	9	10	10	1	9	3	0	3	8420	4701	3719	4701	3719	0	MT-RNR1	rRNA	0	0	1	0
822	8604	0	G	8592	A	10	4	6	0.12	10	4	6	1	0	1	8592	4842	3750	1	1	0	4842	3750	0	MT-RNR1	rRNA	0	0	1	1
823	8539	0	A	8523	G	12	1	11	0.14	8523	4893	3630	3	0	3	12	1	11	1	0	1	4893	3630	0	MT-RNR1	rRNA	0	0	1	1
824	8626	0	T	8597	A	17	1	16	0.2	17	1	16	5	1	4	7	4	3	8597	5006	3591	5006	3591	0	MT-RNR1	rRNA	0	0	1	1
825	8635	0	T	8608	A	16	4	12	0.19	16	4	12	10	6	4	1	0	1	8608	5038	3570	5038	3570	0	MT-RNR1	rRNA	0	0	1	1
826	8493	0	A	8483	T	5	4	1	0.06	8483	4940	3543	0	0	0	5	5	0	5	4	1	4940	3543	0	MT-RNR1	rRNA	0	0	1	1
827	8384	0	A	8380	C	2	0	2	0.02	8380	4928	3452	2	0	2	1	0	1	1	1	0	4928	3452	0	MT-RNR1	rRNA	0	0	1	1
828	8432	0	C	8428	T	2	1	1	0.02	1	1	0	8428	4850	3578	1	1	0	2	1	1	4850	3578	0	MT-RNR1	rRNA	0	0	1	1
829	8369	0	C	8363	T	6	3	3	0.07	0	0	0	8363	4882	3481	0	0	0	6	3	3	4882	3481	0	MT-RNR1	rRNA	0	0	1	1
830	8405	1	T	8394	C	9	5	4	0.11	2	0	2	9	5	4	0	0	0	8394	4942	3452	4942	3452	0	MT-RNR1	rRNA	0	0	1	1
831	8698	0	T	8692	G	3	0	3	0.03	1	0	1	2	0	2	3	0	3	8692	4952	3740	4952	3740	0	MT-RNR1	rRNA	0	0	1	1
832	8677	0	T	8673	A	2	0	2	0.02	2	0	2	1	0	1	1	1	0	8673	4960	3713	4960	3713	0	MT-RNR1	rRNA	0	0	1	1
833	8734	0	A	8730	C	2	1	1	0.02	8730	4971	3759	2	1	1	1	0	1	1	0	1	4971	3759	0	MT-RNR1	rRNA	0	0	1	1
834	8718	0	G	8712	A	3	3	0	0.03	3	3	0	2	0	2	8712	4946	3766	1	0	1	4946	3766	0	MT-RNR1	rRNA	0	0	1	1
835	9292	0	C	9280	A	5	4	1	0.05	5	4	1	9280	5002	4278	2	2	0	5	2	3	5002	4278	0	MT-RNR1	rRNA	0	0	1	1
836	9370	0	A	9362	G	5	1	4	0.05	9362	4764	4598	2	2	0	5	1	4	1	1	0	4764	4598	0	MT-RNR1	rRNA	0	0	1	1
837	9252	0	A	9248	T	2	1	1	0.02	9248	4592	4656	0	0	0	2	1	1	2	1	1	4592	4656	0	MT-RNR1	rRNA	0	0	1	1
838	9255	0	T	9237	A	14	5	9	0.15	14	5	9	3	0	3	1	0	1	9237	4612	4625	4612	4625	0	MT-RNR1	rRNA	0	0	1	0
839	9295	0	A	9290	G	5	3	2	0.05	9290	4601	4689	0	0	0	5	3	2	0	0	0	4601	4689	0	MT-RNR1	rRNA	0	0	1	1
840	9221	1	A	9219	C	2	0	2	0.02	9219	4580	4639	2	0	2	0	0	0	0	0	0	4580	4639	0	MT-RNR1	rRNA	0	0	1	1
841	9075	0	A	9068	T	5	2	3	0.06	9068	4578	4490	0	0	0	2	2	0	5	2	3	4578	4490	0	MT-RNR1	rRNA	0	0	1	1
842	9560	0	C	9554	T	3	1	2	0.03	1	0	1	9554	4870	4684	2	1	1	3	1	2	4870	4684	0	MT-RNR1	rRNA	0	0	1	1
843	9550	0	G	9547	C	2	1	1	0.02	1	0	1	2	1	1	9547	4898	4649	0	0	0	4898	4649	0	MT-RNR1	rRNA	0	0	1	1
844	9533	0	A	9528	G	3	1	2	0.03	9528	4784	4744	1	0	1	3	1	2	1	0	1	4784	4744	0	MT-RNR1	rRNA	0	0	1	1
845	9457	1	A	9449	G	4	0	4	0.04	9449	4720	4729	3	0	3	4	0	4	1	0	1	4720	4729	0	MT-RNR1	rRNA	0	0	1	1
846	9337	0	A	9335	T	2	0	2	0.02	9335	4661	4674	0	0	0	0	0	0	2	0	2	4661	4674	0	MT-RNR1	rRNA	0	0	1	1
847	9433	0	G	9433	A	0	0	0	0	0	0	0	0	0	0	9433	4772	4661	0	0	0	4772	4661	0	MT-RNR1	rRNA	0	0	1	1
848	9269	0	T	9265	C	3	3	0	0.03	1	1	0	3	3	0	0	0	0	9265	4534	4731	4534	4731	0	MT-RNR1	rRNA	0	0	1	1
849	9283	0	T	9280	C	3	2	1	0.03	0	0	0	3	2	1	0	0	0	9280	4548	4732	4548	4732	0	MT-RNR1	rRNA	0	0	1	1
850	9236	0	T	9231	C	4	3	1	0.04	1	0	1	4	3	1	0	0	0	9231	4527	4704	4527	4704	0	MT-RNR1	rRNA	0	0	1	1
851	9318	0	A	9313	G	3	3	0	0.03	9313	4544	4769	1	0	1	3	3	0	1	1	0	4544	4769	0	MT-RNR1	rRNA	0	0	1	1
852	9109	0	A	9105	T	2	0	2	0.02	9105	4359	4746	0	0	0	2	0	2	2	0	2	4359	4746	0	MT-RNR1	rRNA	0	0	1	1
853	9508	0	C	9505	A	3	1	2	0.03	3	1	2	9505	4533	4972	0	0	0	0	0	0	4533	4972	0	MT-RNR1	rRNA	0	0	1	1
854	9517	0	T	9517	A	0	0	0	0	0	0	0	0	0	0	0	0	0	9517	4532	4985	4532	4985	0	MT-RNR1	rRNA	0	0	1	1
855	9598	0	A	9595	C	2	0	2	0.02	9595	4525	5070	2	0	2	1	1	0	0	0	0	4525	5070	0	MT-RNR1	rRNA	0	0	1	1
856	9453	0	A	9448	T	3	1	2	0.03	9448	4428	5020	0	0	0	2	0	2	3	1	2	4428	5020	0	MT-RNR1	rRNA	0	0	1	1
857	9539	0	G	9536	C	2	1	1	0.02	1	1	0	2	1	1	9536	4412	5124	0	0	0	4412	5124	0	MT-RNR1	rRNA	0	0	1	1
858	9538	0	C	9537	T	1	0	1	0.01	0	0	0	9537	4429	5108	0	0	0	1	0	1	4429	5108	0	MT-RNR1	rRNA	0	0	1	1
859	9589	0	T	9573	A	8	0	8	0.08	8	0	8	4	1	3	4	0	4	9573	4099	5474	4099	5474	0	MT-RNR1	rRNA	0	0	1	1
860	9514	0	A	9505	T	5	1	4	0.05	9505	4050	5455	3	1	2	1	0	1	5	1	4	4050	5455	0	MT-RNR1	rRNA	0	0	1	1
861	9435	0	T	9427	C	6	1	5	0.06	2	1	1	6	1	5	0	0	0	9427	4066	5361	4066	5361	0	MT-RNR1	rRNA	0	0	1	1
862	8766	0	A	8753	T	7	0	7	0.08	8753	4052	4701	2	0	2	4	1	3	7	0	7	4052	4701	0	MT-RNR1	rRNA	0	0	1	1
863	9819	0	C	9812	T	5	2	3	0.05	2	1	1	9812	4176	5636	0	0	0	5	2	3	4176	5636	0	MT-RNR1	rRNA	0	0	1	1
864	9776	2	T	9772	C	3	1	2	0.03	1	1	0	3	1	2	0	0	0	9772	4190	5582	4190	5582	0	MT-RNR1	rRNA	0	0	1	1
865	9438	0	A	9431	G	5	1	4	0.05	9431	4154	5277	1	0	1	5	1	4	1	1	0	4154	5277	0	MT-RNR1	rRNA	0	0	1	1
866	8150	0	A	8146	T	2	0	2	0.02	8146	4137	4009	1	1	0	1	0	1	2	0	2	4137	4009	2	MT-RNR1	rRNA	1	0	1	1
867	9756	0	C	9754	T	1	0	1	0.01	0	0	0	9754	4034	5720	1	0	1	1	0	1	4034	5720	6	MT-RNR1	rRNA	1	0	1	1
868	9714	0	C	9706	A	4	0	4	0.04	4	0	4	9706	4107	5599	2	1	1	2	0	2	4107	5599	5	MT-RNR1	rRNA	1	0	1	1
869	9577	0	C	9571	A	3	3	0	0.03	3	3	0	9571	4191	5380	0	0	0	3	1	2	4191	5380	4	MT-RNR1	rRNA	1	0	1	1
870	9527	1	C	9514	G	8	3	5	0.08	4	0	4	9514	4212	5302	8	3	5	1	0	1	4212	5302	3	MT-RNR1	rRNA	1	0	1	1
871	9498	0	A	9446	G	48	2	46	0.51	9446	4210	5236	2	0	2	48	2	46	2	1	1	4210	5236	1	MT-RNR1	rRNA	1	0	1	1
872	9484	0	G	9479	A	3	2	1	0.03	3	2	1	0	0	0	9479	4223	5256	2	2	0	4223	5256	0	MT-RNR1	rRNA	0	0	1	1
873	9303	0	G	9294	C	5	1	4	0.05	2	1	1	5	1	4	9294	4174	5120	2	1	1	4174	5120	0	MT-RNR1	rRNA	0	0	1	1
874	9165	0	G	9159	C	3	2	1	0.03	1	1	0	3	2	1	9159	4111	5048	2	0	2	4111	5048	0	MT-RNR1	rRNA	0	0	1	1
875	8953	0	T	8950	A	2	2	0	0.02	2	2	0	1	0	1	0	0	0	8950	3839	5111	3839	5111	0	MT-RNR1	rRNA	0	0	1	1
876	9044	0	T	9042	C	1	0	1	0.01	0	0	0	1	0	1	1	1	0	9042	4031	5011	4031	5011	0	MT-RNR1	rRNA	0	0	1	1
877	9171	0	G	9169	A	1	1	0	0.01	1	1	0	1	1	0	9169	4067	5102	0	0	0	4067	5102	0	MT-RNR1	rRNA	0	0	1	1
878	9218	0	G	9209	A	3	1	2	0.03	3	1	2	3	0	3	9209	4180	5029	3	1	2	4180	5029	0	MT-RNR1	rRNA	0	0	1	1
879	9024	0	T	9009	C	10	1	9	0.11	4	3	1	10	1	9	1	1	0	9009	4121	4888	4121	4888	0	MT-RNR1	rRNA	0	0	1	1
880	9557	0	C	9548	A	5	3	2	0.05	5	3	2	9548	4500	5048	0	0	0	4	2	2	4500	5048	0	MT-RNR1	rRNA	0	0	1	1
881	9582	0	A	9568	G	12	3	9	0.13	9568	4464	5104	0	0	0	12	3	9	2	1	1	4464	5104	0	MT-RNR1	rRNA	0	0	1	1
882	9483	0	A	9480	G	2	2	0	0.02	9480	4526	4954	0	0	0	2	2	0	1	0	1	4526	4954	0	MT-RNR1	rRNA	0	0	1	1
883	9652	0	T	9648	A	3	2	1	0.03	3	2	1	0	0	0	1	1	0	9648	4587	5061	4587	5061	0	MT-RNR1	rRNA	0	0	1	1
884	9593	0	T	9591	C	2	2	0	0.02	0	0	0	2	2	0	0	0	0	9591	4643	4948	4643	4948	0	MT-RNR1	rRNA	0	0	1	1
885	9107	0	T	9105	C	2	1	1	0.02	0	0	0	2	1	1	0	0	0	9105	4607	4498	4607	4498	0	MT-RNR1	rRNA	0	0	1	1
886	9552	0	C	9547	T	5	3	2	0.05	0	0	0	9547	4543	5004	0	0	0	5	3	2	4543	5004	0	MT-RNR1	rRNA	0	0	1	1
887	9797	0	G	9795	T	2	2	0	0.02	0	0	0	0	0	0	9795	4580	5215	2	2	0	4580	5215	0	MT-RNR1	rRNA	0	0	1	1
888	9512	0	T	9509	C	2	1	1	0.02	1	0	1	2	1	1	0	0	0	9509	4545	4964	4545	4964	0	MT-RNR1	rRNA	0	0	1	1
889	9609	0	G	9602	T	3	3	0	0.03	2	2	0	2	1	1	9602	4615	4987	3	3	0	4615	4987	0	MT-RNR1	rRNA	0	0	1	1
890	9723	0	C	9714	A	5	2	3	0.05	5	2	3	9714	4628	5086	2	1	1	2	1	1	4628	5086	0	MT-RNR1	rRNA	0	0	1	1
891	9687	0	C	9682	A	2	0	2	0.02	2	0	2	9682	4654	5028	2	2	0	1	1	0	4654	5028	0	MT-RNR1	rRNA	0	0	1	1
892	9560	0	A	9554	G	5	2	3	0.05	9554	4563	4991	0	0	0	5	2	3	1	1	0	4563	4991	0	MT-RNR1	rRNA	0	0	1	1
893	9592	0	G	9587	T	3	2	1	0.03	0	0	0	2	1	1	9587	4556	5031	3	2	1	4556	5031	0	MT-RNR1	rRNA	0	0	1	1
894	9471	0	C	9466	A	4	2	2	0.04	4	2	2	9466	4540	4926	0	0	0	1	0	1	4540	4926	0	MT-RNR1	rRNA	0	0	1	1
895	9304	0	C	9297	T	6	5	1	0.06	0	0	0	9297	4556	4741	1	1	0	6	5	1	4556	4741	0	MT-RNR1	rRNA	0	0	1	1
896	8727	0	A	8722	C	3	3	0	0.03	8722	4552	4170	3	3	0	1	0	1	1	0	1	4552	4170	0	MT-RNR1	rRNA	0	0	1	1
897	9558	0	C	9556	A	1	1	0	0.01	1	1	0	9556	4676	4880	0	0	0	1	1	0	4676	4880	0	MT-RNR1	rRNA	0	0	1	1
898	9582	0	C	9576	A	3	3	0	0.03	3	3	0	9576	4745	4831	1	1	0	2	2	0	4745	4831	0	MT-RNR1	rRNA	0	0	1	1
899	9610	1	G	9607	A	2	0	2	0.02	2	0	2	0	0	0	9607	4788	4819	1	0	1	4788	4819	0	MT-RNR1	rRNA	0	0	1	1
900	9696	2	C	9683	T	6	1	5	0.06	2	1	1	9683	4770	4913	5	0	5	6	1	5	4770	4913	0	MT-RNR1	rRNA	0	0	1	1
901	9721	1	G	9717	A	2	1	1	0.02	2	1	1	0	0	0	9717	4790	4927	2	1	1	4790	4927	0	MT-RNR1	rRNA	0	0	1	1
902	9587	0	G	9580	A	4	2	2	0.04	4	2	2	0	0	0	9580	4798	4782	3	1	2	4798	4782	0	MT-RNR1	rRNA	0	0	1	1
903	9235	0	T	9201	C	18	1	17	0.19	12	5	7	18	1	17	4	0	4	9201	4566	4635	4566	4635	0	MT-RNR1	rRNA	0	0	1	1
904	9423	0	C	9413	G	6	4	2	0.06	2	0	2	9413	4769	4644	6	4	2	2	0	2	4769	4644	0	MT-RNR1	rRNA	0	0	1	1
905	9436	0	A	9409	G	21	2	19	0.22	9409	4796	4613	2	1	1	21	2	19	4	0	4	4796	4613	0	MT-RNR1	rRNA	0	0	1	1
906	9800	0	C	9786	T	9	7	2	0.09	1	0	1	9786	5113	4673	4	3	1	9	7	2	5113	4673	0	MT-RNR1	rRNA	0	0	1	1
907	9596	0	A	9586	C	6	4	2	0.06	9586	5087	4499	6	4	2	1	1	0	3	1	2	5087	4499	0	MT-RNR1	rRNA	0	0	1	1
908	9506	1	C	9497	T	4	0	4	0.04	1	0	1	9497	4899	4598	4	4	0	4	0	4	4899	4598	0	MT-RNR1	rRNA	0	0	1	1
909	9495	0	G	9486	A	5	2	3	0.05	5	2	3	1	0	1	9486	4928	4558	3	1	2	4928	4558	0	MT-RNR1	rRNA	0	0	1	1
910	9471	0	A	9464	T	4	2	2	0.04	9464	4850	4614	0	0	0	3	1	2	4	2	2	4850	4614	0	MT-RNR1	rRNA	0	0	1	1
911	9481	0	T	9474	C	3	3	0	0.03	1	0	1	3	3	0	3	1	2	9474	4817	4657	4817	4657	0	MT-RNR1	rRNA	0	0	1	1
912	9336	0	T	9333	A	2	1	1	0.02	2	1	1	1	0	1	0	0	0	9333	4764	4569	4764	4569	0	MT-RNR1	rRNA	0	0	1	1
913	9376	0	A	9371	C	3	2	1	0.03	9371	4765	4606	3	2	1	2	1	1	0	0	0	4765	4606	0	MT-RNR1	rRNA	0	0	1	1
914	9031	0	A	9029	T	1	0	1	0.01	9029	4770	4259	0	0	0	1	1	0	1	0	1	4770	4259	0	MT-RNR1	rRNA	0	0	1	1
915	9508	0	C	9503	T	3	3	0	0.03	2	1	1	9503	4828	4675	0	0	0	3	3	0	4828	4675	0	MT-RNR1	rRNA	0	0	1	1
916	9528	0	C	9525	A	1	1	0	0.01	1	1	0	9525	4857	4668	1	0	1	1	0	1	4857	4668	0	MT-RNR1	rRNA	0	0	1	1
917	9397	0	C	9391	T	3	1	2	0.03	2	2	0	9391	4840	4551	1	1	0	3	1	2	4840	4551	0	MT-RNR1	rRNA	0	0	1	1
918	9282	0	A	9265	G	14	0	14	0.15	9265	4600	4665	1	1	0	14	0	14	2	0	2	4600	4665	0	MT-RNR1	rRNA	0	0	1	1
919	9314	0	A	9310	T	2	2	0	0.02	9310	4586	4724	1	1	0	1	0	1	2	2	0	4586	4724	0	MT-RNR1	rRNA	0	0	1	1
920	9351	0	G	9345	A	4	3	1	0.04	4	3	1	1	1	0	9345	4644	4701	1	0	1	4644	4701	0	MT-RNR1	rRNA	0	0	1	1
921	9063	2	T	9055	A	5	3	2	0.06	5	3	2	0	0	0	3	2	1	9055	4542	4513	4542	4513	0	MT-RNR1	rRNA	0	0	1	1
922	9150	0	C	9142	T	4	1	3	0.04	2	2	0	9142	4579	4563	2	1	1	4	1	3	4579	4563	0	MT-RNR1	rRNA	0	0	1	1
923	9179	0	A	9172	G	5	5	0	0.05	9172	4562	4610	0	0	0	5	5	0	2	1	1	4562	4610	0	MT-RNR1	rRNA	0	0	1	1
924	9073	0	A	9068	G	5	3	2	0.06	9068	4484	4584	0	0	0	5	3	2	0	0	0	4484	4584	0	MT-RNR1	rRNA	0	0	1	1
925	9139	2	T	9137	C	2	0	2	0.02	0	0	0	2	0	2	0	0	0	9137	4558	4579	4558	4579	0	MT-RNR1	rRNA	0	0	1	1
926	9096	0	A	9093	C	2	2	0	0.02	9093	4555	4538	2	2	0	1	1	0	0	0	0	4555	4538	0	MT-RNR1	rRNA	0	0	1	1
927	9151	1	G	9147	A	4	1	3	0.04	4	1	3	0	0	0	9147	4567	4580	0	0	0	4567	4580	0	MT-RNR1	rRNA	0	0	1	1
928	9145	0	A	9136	G	4	3	1	0.04	9136	4542	4594	2	2	0	4	3	1	3	1	2	4542	4594	0	MT-RNR1	rRNA	0	0	1	1
929	9282	0	A	9242	G	20	7	13	0.22	9242	4494	4748	8	1	7	20	7	13	12	10	2	4494	4748	0	MT-RNR1	rRNA	0	0	1	0
930	9286	0	G	9266	T	12	0	12	0.13	0	0	0	8	4	4	9266	4521	4745	12	0	12	4521	4745	0	MT-RNR1	rRNA	0	0	1	1
931	9326	0	C	9311	T	10	5	5	0.11	5	4	1	9311	4764	4547	0	0	0	10	5	5	4764	4547	0	MT-RNR1	rRNA	0	0	1	0
932	9452	0	C	9431	G	9	3	6	0.1	6	0	6	9431	4799	4632	9	3	6	6	0	6	4799	4632	0	MT-RNR1	rRNA	0	0	1	1
933	9541	0	G	9485	A	51	3	48	0.53	51	3	48	2	0	2	9485	4849	4636	3	0	3	4849	4636	0	MT-RNR1	rRNA	0	0	1	1
934	9618	0	G	9550	A	51	1	50	0.53	51	1	50	7	1	6	9550	4874	4676	10	4	6	4874	4676	0	MT-RNR1	rRNA	0	0	1	1
935	9118	0	C	9052	G	34	1	33	0.37	21	5	16	9052	4971	4081	34	1	33	11	3	8	4971	4081	0	MT-RNR1	rRNA	0	0	1	1
936	8943	0	G	8917	A	19	4	15	0.21	19	4	15	3	1	2	8917	5113	3804	4	0	4	5113	3804	0	MT-RNR1	rRNA	0	0	1	1
937	8721	0	T	8669	G	32	5	27	0.37	11	2	9	9	2	7	32	5	27	8669	4943	3726	4943	3726	0	MT-RNR1	rRNA	0	0	1	0
938	8904	0	A	8891	T	8	4	4	0.09	8891	5168	3723	0	0	0	5	0	5	8	4	4	5168	3723	0	MT-RNR1	rRNA	0	0	1	1
939	9134	0	A	9124	T	4	4	0	0.04	9124	5284	3840	3	2	1	3	1	2	4	4	0	5284	3840	0	MT-RNR1	rRNA	0	0	1	1
940	9165	0	A	9156	C	4	4	0	0.04	9156	5306	3850	4	4	0	4	1	3	1	1	0	5306	3850	0	MT-RNR1	rRNA	0	0	1	1
941	9164	0	G	9159	A	3	1	2	0.03	3	1	2	1	1	0	9159	5320	3839	1	1	0	5320	3839	0	MT-RNR1	rRNA	0	0	1	1
942	8809	0	A	8807	T	2	0	2	0.02	8807	5028	3779	0	0	0	0	0	0	2	0	2	5028	3779	0	MT-RNR1	rRNA	0	0	1	1
943	8853	0	G	8848	T	2	0	2	0.02	1	1	0	2	0	2	8848	5042	3806	2	0	2	5042	3806	0	MT-RNR1	rRNA	0	0	1	1
944	8067	0	T	8059	C	6	3	3	0.07	2	1	1	6	3	3	0	0	0	8059	4228	3831	4228	3831	0	MT-RNR1	rRNA	0	0	1	1
945	9312	0	G	9306	T	3	2	1	0.03	2	1	1	1	1	0	9306	5447	3859	3	2	1	5447	3859	2	MT-RNR1	rRNA	1	0	1	1
946	9479	2	T	9465	A	6	0	6	0.06	6	0	6	5	1	4	3	0	3	9465	5286	4179	5286	4179	6	MT-RNR1	rRNA	1	0	1	1
947	9741	0	T	9735	C	4	1	3	0.04	0	0	0	4	1	3	2	0	2	9735	5543	4192	5543	4192	5	MT-RNR1	rRNA	1	0	1	1
948	10230	0	T	10221	C	6	0	6	0.06	1	0	1	6	0	6	2	1	1	10221	5582	4639	5582	4639	4	MT-RNR1	rRNA	1	0	1	1
949	10666	0	T	10656	C	5	0	5	0.05	0	0	0	5	0	5	5	0	5	10656	5598	5058	5598	5058	3	MT-RNR1	rRNA	1	0	1	1
950	10669	2	A	10654	G	6	0	6	0.06	10654	5611	5043	5	0	5	6	0	6	4	1	3	5611	5043	1	MT-RNR1	rRNA	1	0	1	1
951	10666	0	G	10655	T	6	2	4	0.06	2	0	2	3	1	2	10655	5622	5033	6	2	4	5622	5033	0	MT-RNR1	rRNA	0	0	1	1
952	10465	0	A	10453	C	7	2	5	0.07	10453	5666	4787	7	2	5	4	4	0	1	0	1	5666	4787	0	MT-RNR1	rRNA	0	0	1	1
953	10189	0	T	10181	C	4	1	3	0.04	3	2	1	4	1	3	1	0	1	10181	5496	4685	5496	4685	0	MT-RNR1	rRNA	0	0	1	1
954	10116	2	C	10107	T	6	5	1	0.06	1	1	0	10107	5625	4482	2	0	2	6	5	1	5625	4482	0	MT-RNR1	rRNA	0	0	1	1
955	8802	1	A	8766	G	18	14	4	0.2	8766	5650	3116	11	7	4	18	14	4	7	7	0	5650	3116	2	MT-RNR1	rRNA	1	0	1	1
956	10581	3	C	10575	T	5	1	4	0.05	0	0	0	10575	5699	4876	1	1	0	5	1	4	5699	4876	2	MT-RNR1	rRNA	1	0	1	1
957	10597	0	C	10587	G	5	3	2	0.05	1	1	0	10587	5873	4714	5	3	2	4	2	2	5873	4714	5	MT-RNR1	rRNA	1	0	1	1
958	10652	0	C	10640	A	7	3	4	0.07	7	3	4	10640	5898	4742	2	1	1	3	3	0	5898	4742	4	MT-RNR1	rRNA	1	0	1	1
959	10192	0	C	10174	A	10	8	2	0.1	10	8	2	10174	5902	4272	3	2	1	5	2	3	5902	4272	3	MT-RNR1	rRNA	1	0	1	1
960	10275	0	C	10258	G	13	8	5	0.13	3	2	1	10258	5989	4269	13	8	5	1	1	0	5989	4269	1	MT-RNR1	rRNA	1	0	1	0
961	10172	0	T	10148	A	10	9	1	0.1	10	9	1	6	1	5	8	0	8	10148	5947	4201	5947	4201	1	MT-RNR1	rRNA	1	0	1	1
962	10496	0	C	10478	T	12	8	4	0.11	4	2	2	10478	6110	4368	2	1	1	12	8	4	6110	4368	6	MT-RNR1	rRNA	1	0	1	1
963	10924	0	C	10913	T	7	2	5	0.06	1	1	0	10913	5997	4916	3	0	3	7	2	5	5997	4916	5	MT-RNR1	rRNA	1	0	1	1
964	10917	0	C	10903	T	7	4	3	0.06	4	0	4	10903	5984	4919	3	0	3	7	4	3	5984	4919	4	MT-RNR1	rRNA	1	0	1	1
965	10926	0	C	10911	T	8	0	8	0.07	4	2	2	10911	6004	4907	3	0	3	8	0	8	6004	4907	3	MT-RNR1	rRNA	1	0	1	1
966	10960	1	A	10937	G	19	3	16	0.17	10937	6039	4898	3	1	2	19	3	16	1	0	1	6039	4898	1	MT-RNR1	rRNA	1	0	1	1
967	10855	2	A	10845	T	5	1	4	0.05	10845	5971	4874	0	0	0	5	1	4	5	1	4	5971	4874	0	MT-RNR1	rRNA	0	0	1	1
968	11044	0	T	11023	A	10	1	9	0.09	10	1	9	6	3	3	5	0	5	11023	6076	4947	6076	4947	0	MT-RNR1	rRNA	0	0	1	1
969	11002	0	A	10997	C	2	2	0	0.02	10997	6001	4996	2	2	0	2	0	2	1	0	1	6001	4996	0	MT-RNR1	rRNA	0	0	1	1
970	11002	0	A	10993	T	7	0	7	0.06	10993	5974	5019	0	0	0	2	0	2	7	0	7	5974	5019	0	MT-RNR1	rRNA	0	0	1	1
971	11037	1	A	11028	C	9	1	8	0.08	11028	5991	5037	9	1	8	0	0	0	0	0	0	5991	5037	0	MT-RNR1	rRNA	0	0	1	1
972	11096	0	G	11087	T	9	0	9	0.08	0	0	0	0	0	0	11087	6082	5005	9	0	9	6082	5005	0	MT-RNR1	rRNA	0	0	1	1
973	11683	0	C	11678	T	3	2	1	0.03	2	1	1	11678	6773	4905	0	0	0	3	2	1	6773	4905	0	MT-RNR1	rRNA	0	0	1	1
974	11614	0	T	11602	A	7	2	5	0.06	7	2	5	3	1	2	2	0	2	11602	6779	4823	6779	4823	2	MT-RNR1	rRNA	1	0	1	1
975	11698	0	A	11690	G	4	2	2	0.03	11690	6811	4879	3	3	0	4	2	2	1	0	1	6811	4879	6	MT-RNR1	rRNA	1	0	1	1
976	11707	0	A	11704	G	2	1	1	0.02	11704	6822	4882	1	1	0	2	1	1	0	0	0	6822	4882	5	MT-RNR1	rRNA	1	0	1	1
977	11643	0	A	11639	T	2	1	1	0.02	11639	6784	4855	0	0	0	2	2	0	2	1	1	6784	4855	4	MT-RNR1	rRNA	1	0	1	1
978	11248	0	A	11243	C	2	2	0	0.02	11243	6560	4683	2	2	0	2	0	2	1	0	1	6560	4683	3	MT-RNR1	rRNA	1	0	1	1
979	11369	0	C	11359	A	5	4	1	0.04	5	4	1	11359	6540	4819	4	4	0	1	1	0	6540	4819	1	MT-RNR1	rRNA	1	0	1	1
980	11041	0	T	11029	C	7	1	6	0.06	3	3	0	7	1	6	2	1	1	11029	6206	4823	6206	4823	0	MT-RNR1	rRNA	0	0	1	1
981	11165	0	C	11159	T	3	0	3	0.03	0	0	0	11159	6220	4939	3	3	0	3	0	3	6220	4939	0	MT-RNR1	rRNA	0	0	1	1
982	11212	2	A	11205	C	5	1	4	0.04	11205	6107	5098	5	1	4	1	0	1	1	0	1	6107	5098	0	MT-RNR1	rRNA	0	0	1	1
983	11224	0	C	11216	T	7	3	4	0.06	1	1	0	11216	6046	5170	0	0	0	7	3	4	6046	5170	0	MT-RNR1	rRNA	0	0	1	1
984	11231	0	C	11223	A	4	4	0	0.04	4	4	0	11223	6158	5065	0	0	0	4	3	1	6158	5065	0	MT-RNR1	rRNA	0	0	1	1
985	11259	0	T	11252	G	5	4	1	0.04	1	0	1	1	1	0	5	4	1	11252	6150	5102	6150	5102	0	MT-RNR1	rRNA	0	0	1	1
986	11278	0	G	11273	A	3	3	0	0.03	3	3	0	1	0	1	11273	6148	5125	1	0	1	6148	5125	0	MT-RNR1	rRNA	0	0	1	1
987	11462	0	A	11459	C	2	0	2	0.02	11459	6056	5403	2	0	2	1	0	1	0	0	0	6056	5403	0	MT-RNR1	rRNA	0	0	1	1
988	11572	0	G	11567	T	2	1	1	0.02	1	0	1	2	0	2	11567	6097	5470	2	1	1	6097	5470	0	MT-RNR1	rRNA	0	0	1	1
989	11513	0	T	11507	A	3	0	3	0.03	3	0	3	3	3	0	0	0	0	11507	5998	5509	5998	5509	0	MT-RNR1	rRNA	0	0	1	1
990	11552	0	T	11546	C	3	0	3	0.03	0	0	0	3	0	3	3	1	2	11546	6020	5526	6020	5526	0	MT-RNR1	rRNA	0	0	1	1
991	11610	1	G	11598	T	6	2	4	0.05	3	2	1	3	0	3	11598	6056	5542	6	2	4	6056	5542	0	MT-RNR1	rRNA	0	0	1	1
992	11616	0	T	11587	A	27	15	12	0.23	27	15	12	2	0	2	0	0	0	11587	6035	5552	6035	5552	2	MT-RNR1	rRNA	1	0	1	0
993	11927	242	A	11921	G	5	3	2	0.04	11921	6352	5569	1	1	0	5	3	2	0	0	0	6352	5569	2	MT-RNR1	rRNA	1	0	1	1
994	12245	0	A	12241	T	3	1	2	0.02	12241	6630	5611	1	1	0	0	0	0	3	1	2	6630	5611	2	MT-RNR1	rRNA	1	0	1	1
995	12273	0	A	12269	T	2	1	1	0.02	12269	6621	5648	1	1	0	1	0	1	2	1	1	6621	5648	4	MT-RNR1	rRNA	1	0	1	1
996	12290	0	A	12287	G	2	2	0	0.02	12287	6623	5664	0	0	0	2	2	0	1	0	1	6623	5664	3	MT-RNR1	rRNA	1	0	1	1
997	12179	0	A	12174	C	3	1	2	0.02	12174	6459	5715	3	1	2	1	0	1	1	1	0	6459	5715	1	MT-RNR1	rRNA	1	0	1	1
998	11822	0	A	11815	T	3	0	3	0.03	11815	6266	5549	3	2	1	1	0	1	3	0	3	6266	5549	1	MT-RNR1	rRNA	1	0	1	1
999	12460	0	C	12457	T	2	1	1	0.02	1	1	0	12457	6335	6122	0	0	0	2	1	1	6335	6122	1	MT-RNR1	rRNA	1	0	1	1
1000	12384	0	T	12378	C	3	0	3	0.02	1	1	0	3	0	3	2	0	2	12378	6341	6037	6341	6037	0	MT-RNR1	rRNA	0	0	1	1
1001	12459	0	C	12448	T	8	2	6	0.06	1	1	0	12448	6343	6105	2	1	1	8	2	6	6343	6105	0	MT-RNR1	rRNA	0	0	1	1
1002	12473	0	C	12469	T	4	3	1	0.03	0	0	0	12469	6315	6154	0	0	0	4	3	1	6315	6154	0	MT-RNR1	rRNA	0	0	1	1
1003	12413	0	A	12410	C	2	0	2	0.02	12410	6325	6085	2	0	2	0	0	0	1	1	0	6325	6085	0	MT-RNR1	rRNA	0	0	1	1
1004	12456	0	G	12451	C	4	4	0	0.03	1	1	0	4	4	0	12451	6346	6105	0	0	0	6346	6105	0	MT-RNR1	rRNA	0	0	1	1
1005	12477	0	T	12464	A	5	2	3	0.04	5	2	3	5	3	2	3	1	2	12464	6262	6202	6262	6202	0	MT-RNR1	rRNA	0	0	1	1
1006	12530	0	T	12523	C	4	2	2	0.03	1	0	1	4	2	2	2	1	1	12523	6030	6493	6030	6493	0	MT-RNR1	rRNA	0	0	1	1
1007	12542	2	G	12535	C	4	0	4	0.03	2	1	1	4	0	4	12535	6024	6511	1	0	1	6024	6511	0	MT-RNR1	rRNA	0	0	1	1
1008	12390	0	A	12383	T	5	1	4	0.04	12383	5961	6422	1	0	1	1	0	1	5	1	4	5961	6422	0	MT-RNR1	rRNA	0	0	1	1
1009	12431	0	C	12427	A	2	1	1	0.02	2	1	1	12427	5940	6487	1	0	1	1	0	1	5940	6487	0	MT-RNR1	rRNA	0	0	1	1
1010	12557	0	A	12548	G	7	3	4	0.06	12548	5947	6601	0	0	0	7	3	4	2	0	2	5947	6601	0	MT-RNR1	rRNA	0	0	1	1
1011	12734	0	C	12725	T	9	3	6	0.07	0	0	0	12725	5970	6755	0	0	0	9	3	6	5970	6755	2	MT-RNR1	rRNA	1	0	1	1
1012	13002	0	A	12989	C	5	1	4	0.04	12989	6070	6919	5	1	4	5	2	3	3	0	3	6070	6919	6	MT-RNR1	rRNA	1	0	1	1
1013	13155	0	A	13147	T	4	0	4	0.03	13147	6230	6917	2	2	0	2	0	2	4	0	4	6230	6917	5	MT-RNR1	rRNA	1	0	1	1
1014	13175	0	A	13170	G	3	1	2	0.02	13170	6245	6925	2	1	1	3	1	2	0	0	0	6245	6925	4	MT-RNR1	rRNA	1	0	1	1
1015	13077	0	A	13074	C	2	1	1	0.02	13074	6184	6890	2	1	1	0	0	0	1	0	1	6184	6890	3	MT-RNR1	rRNA	1	0	1	1
1016	13074	0	T	13070	G	2	0	2	0.02	1	1	0	1	1	0	2	0	2	13070	6252	6818	6252	6818	1	MT-RNR1	rRNA	1	0	1	1
1017	12999	0	A	12997	G	2	2	0	0.02	12997	6272	6725	0	0	0	2	2	0	0	0	0	6272	6725	0	MT-RNR1	rRNA	0	0	1	1
1018	13028	0	G	13026	A	1	0	1	0.01	1	0	1	0	0	0	13026	6291	6735	1	0	1	6291	6735	0	MT-RNR1	rRNA	0	0	1	1
1019	12859	0	A	12853	G	4	3	1	0.03	12853	6258	6595	0	0	0	4	3	1	2	2	0	6258	6595	0	MT-RNR1	rRNA	0	0	1	1
1020	12793	0	C	12785	A	4	2	2	0.03	4	2	2	12785	6151	6634	3	3	0	1	0	1	6151	6634	0	MT-RNR1	rRNA	0	0	1	1
1021	12716	0	T	12707	A	5	4	1	0.04	5	4	1	1	1	0	3	2	1	12707	6142	6565	6142	6565	0	MT-RNR1	rRNA	0	0	1	1
1022	12686	0	A	12681	T	2	2	0	0.02	12681	6117	6564	1	1	0	2	1	1	2	2	0	6117	6564	0	MT-RNR1	rRNA	0	0	1	1
1023	12696	0	C	12687	A	5	2	3	0.04	5	2	3	12687	6105	6582	2	2	0	2	1	1	6105	6582	0	MT-RNR1	rRNA	0	0	1	1
1024	12643	0	G	12639	T	2	2	0	0.02	1	0	1	1	0	1	12639	6051	6588	2	2	0	6051	6588	0	MT-RNR1	rRNA	0	0	1	1
1025	12561	1	A	12542	G	11	6	5	0.09	12542	5970	6572	0	0	0	11	6	5	8	1	7	5970	6572	0	MT-RNR1	rRNA	0	0	1	0
1026	12533	0	A	12521	G	7	1	6	0.06	12521	5976	6545	2	0	2	7	1	6	3	0	3	5976	6545	0	MT-RNR1	rRNA	0	0	1	1
1027	12443	0	A	12439	G	2	2	0	0.02	12439	5936	6503	1	1	0	2	2	0	1	1	0	5936	6503	0	MT-RNR1	rRNA	0	0	1	1
1028	12407	0	G	12403	T	2	2	0	0.02	0	0	0	2	1	1	12403	5927	6476	2	2	0	5927	6476	0	MT-RNR1	rRNA	0	0	1	1
1029	12003	2	T	11996	C	6	3	3	0.05	0	0	0	6	3	3	1	1	0	11996	5717	6279	5717	6279	0	MT-RNR1	rRNA	0	0	1	1
1030	12079	0	G	12075	C	2	2	0	0.02	1	1	0	2	2	0	12075	5787	6288	1	0	1	5787	6288	0	MT-RNR1	rRNA	0	0	1	1
1031	11763	0	G	11758	A	3	1	2	0.03	3	1	2	2	2	0	11758	5566	6192	0	0	0	5566	6192	0	MT-RNR1	rRNA	0	0	1	1
1032	11588	0	C	11580	G	4	2	2	0.03	2	1	1	11580	5478	6102	4	2	2	2	0	2	5478	6102	0	MT-RNR1	rRNA	0	0	1	1
1033	11466	0	T	11374	G	43	0	43	0.38	34	3	31	15	1	14	43	0	43	11374	5458	5916	5458	5916	0	MT-RNR1	rRNA	0	0	1	1
1034	11333	0	T	11329	C	4	2	2	0.04	0	0	0	4	2	2	0	0	0	11329	5430	5899	5430	5899	0	MT-RNR1	rRNA	0	0	1	1
1035	11195	0	T	11193	C	2	0	2	0.02	0	0	0	2	0	2	0	0	0	11193	5295	5898	5295	5898	0	MT-RNR1	rRNA	0	0	1	1
1036	11032	0	A	11026	G	3	2	1	0.03	11026	5139	5887	1	1	0	3	2	1	2	2	0	5139	5887	0	MT-RNR1	rRNA	0	0	1	1
1037	10957	0	A	10955	G	2	1	1	0.02	10955	5086	5869	0	0	0	2	1	1	0	0	0	5086	5869	0	MT-RNR1	rRNA	0	0	1	1
1038	10832	0	C	10827	T	4	1	3	0.04	1	0	1	10827	4962	5865	0	0	0	4	1	3	4962	5865	0	MT-RNR1	rRNA	0	0	1	1
1039	10698	0	A	10696	T	1	0	1	0.01	10696	4955	5741	0	0	0	1	0	1	1	0	1	4955	5741	0	MT-RNR1	rRNA	0	0	1	1
1040	10657	0	T	10648	C	5	3	2	0.05	0	0	0	5	3	2	4	3	1	10648	4920	5728	4920	5728	0	MT-RNR1	rRNA	0	0	1	1
1041	10603	0	A	10603	T	0	0	0	0	10603	4880	5723	0	0	0	0	0	0	0	0	0	4880	5723	0	MT-RNR1	rRNA	0	0	1	1
1042	10548	0	T	10544	C	2	0	2	0.02	1	1	0	2	0	2	1	1	0	10544	4865	5679	4865	5679	0	MT-RNR1	rRNA	0	0	1	1
1043	10467	0	C	10461	A	3	2	1	0.03	3	2	1	10461	4790	5671	1	0	1	2	2	0	4790	5671	0	MT-RNR1	rRNA	0	0	1	1
1044	10409	0	T	10388	C	13	1	12	0.12	3	2	1	13	1	12	5	4	1	10388	4776	5612	4776	5612	0	MT-RNR1	rRNA	0	0	1	1
1045	9894	0	G	9888	C	4	2	2	0.04	0	0	0	4	2	2	9888	4273	5615	2	2	0	4273	5615	0	MT-RNR1	rRNA	0	0	1	1
1046	9440	0	A	9435	G	3	0	3	0.03	9435	4200	5235	2	2	0	3	0	3	0	0	0	4200	5235	8	MT-RNR1	rRNA	1	0	1	1
1047	9348	0	A	9338	G	7	4	3	0.07	9338	4127	5211	0	0	0	7	4	3	3	2	1	4127	5211	9	MT-RNR1	rRNA	1	0	1	1
1048	8905	0	C	8888	A	8	6	2	0.09	8	6	2	8888	4121	4767	6	2	4	3	0	3	4121	4767	10	MT-RNR1	rRNA	1	0	1	1
1049	8428	0	A	8418	T	5	4	1	0.06	8418	4108	4310	0	0	0	5	3	2	5	4	1	4108	4310	11	MT-RNR1	rRNA	1	0	1	1
1050	8429	1	C	8416	G	7	7	0	0.08	3	2	1	8416	4094	4322	7	7	0	3	2	1	4094	4322	12	MT-RNR1	rRNA	1	0	1	1
1051	8381	0	A	8373	G	6	3	3	0.07	8373	4078	4295	1	1	0	6	3	3	1	1	0	4078	4295	13	MT-RNR1	rRNA	1	0	1	1
1052	8325	0	C	8310	T	11	8	3	0.13	1	1	0	8310	4008	4302	3	2	1	11	8	3	4008	4302	14	MT-RNR1	rRNA	1	0	1	1
1053	8242	0	A	8210	G	27	3	24	0.33	8210	3981	4229	5	4	1	27	3	24	0	0	0	3981	4229	7	MT-RNR1	rRNA	1	0	1	1
1054	7999	1	A	7995	G	4	3	1	0.05	7995	3824	4171	0	0	0	4	3	1	0	0	0	3824	4171	7	MT-RNR1	rRNA	1	0	1	1
1055	7944	0	T	7937	G	6	4	2	0.08	0	0	0	1	0	1	6	4	2	7937	3777	4160	3777	4160	0	MT-RNR1	rRNA	0	0	1	1
1056	7912	0	A	7909	T	2	1	1	0.03	7909	3767	4142	0	0	0	1	0	1	2	1	1	3767	4142	0	MT-RNR1	rRNA	0	0	1	1
1057	7491	0	G	7489	T	2	1	1	0.03	0	0	0	0	0	0	7489	3350	4139	2	1	1	3350	4139	0	MT-RNR1	rRNA	0	0	1	1
1058	7502	0	C	7499	T	2	1	1	0.03	1	0	1	7499	3422	4077	0	0	0	2	1	1	3422	4077	0	MT-RNR1	rRNA	0	0	1	1
1059	7415	0	T	7402	C	6	0	6	0.08	2	0	2	6	0	6	5	0	5	7402	3375	4027	3375	4027	0	MT-RNR1	rRNA	0	0	1	1
1060	7379	0	A	7378	T	1	0	1	0.01	7378	3366	4012	0	0	0	0	0	0	1	0	1	3366	4012	0	MT-RNR1	rRNA	0	0	1	1
1061	7329	2	A	7328	T	1	1	0	0.01	7328	3388	3940	0	0	0	0	0	0	1	1	0	3388	3940	0	MT-RNR1	rRNA	0	0	1	1
1062	6951	0	G	6951	A	0	0	0	0	0	0	0	0	0	0	6951	3037	3914	0	0	0	3037	3914	0	MT-RNR1	rRNA	0	0	1	1
1063	6440	0	A	6439	G	1	0	1	0.02	6439	3155	3284	0	0	0	1	0	1	0	0	0	3155	3284	0	MT-RNR1	rRNA	0	0	1	1
1064	6341	0	C	6334	T	4	2	2	0.06	2	1	1	6334	3025	3309	1	1	0	4	2	2	3025	3309	0	MT-RNR1	rRNA	0	0	1	1
1065	6438	0	C	6433	A	2	2	0	0.03	2	2	0	6433	3136	3297	1	1	0	2	1	1	3136	3297	0	MT-RNR1	rRNA	0	0	1	1
1066	6420	0	C	6412	G	5	1	4	0.08	2	2	0	6412	3123	3289	5	1	4	1	1	0	3123	3289	0	MT-RNR1	rRNA	0	0	1	1
1067	6315	0	A	6254	G	56	2	54	0.89	6254	3033	3221	3	0	3	56	2	54	2	1	1	3033	3221	0	MT-RNR1	rRNA	0	0	1	1
1068	6088	0	A	6076	G	8	1	7	0.13	6076	2946	3130	3	1	2	8	1	7	1	0	1	2946	3130	0	MT-RNR1	rRNA	0	0	1	1
1069	6027	0	A	6019	G	4	2	2	0.07	6019	2924	3095	2	0	2	4	2	2	2	0	2	2924	3095	0	MT-RNR1	rRNA	0	0	1	1
1070	5881	0	C	5869	T	5	1	4	0.09	4	3	1	5869	2797	3072	3	2	1	5	1	4	2797	3072	0	MT-RNR1	rRNA	0	0	1	1
1071	5683	0	T	5675	C	4	1	3	0.07	3	3	0	4	1	3	1	0	1	5675	2645	3030	2645	3030	0	MT-RNR1	rRNA	0	0	1	1
1072	5670	0	G	5662	A	3	0	3	0.05	3	0	3	3	3	0	5662	2621	3041	2	2	0	2621	3041	0	MT-RNR1	rRNA	0	0	1	1
1073	5123	0	G	5123	A	0	0	0	0	0	0	0	0	0	0	5123	2087	3036	0	0	0	2087	3036	0	MT-RNR1	rRNA	0	0	1	1
1074	5071	0	G	5070	A	1	0	1	0.02	1	0	1	0	0	0	5070	2045	3025	0	0	0	2045	3025	0	MT-RNR1	rRNA	0	0	1	1
1075	4980	0	A	4975	T	2	0	2	0.04	4975	1994	2981	1	1	0	2	1	1	2	0	2	1994	2981	0	MT-RNR1	rRNA	0	0	1	1
1076	4928	0	T	4926	A	1	0	1	0.02	1	0	1	0	0	0	1	1	0	4926	1959	2967	1959	2967	0	MT-RNR1	rRNA	0	0	1	1
1077	4940	0	T	4938	A	1	1	0	0.02	1	1	0	1	0	1	0	0	0	4938	1993	2945	1993	2945	0	MT-RNR1	rRNA	0	0	1	1
1078	4940	0	A	4939	T	1	1	0	0.02	4939	1993	2946	0	0	0	0	0	0	1	1	0	1993	2946	0	MT-RNR1	rRNA	0	0	1	1
1079	4879	0	G	4877	A	1	0	1	0.02	1	0	1	1	1	0	4877	1942	2935	0	0	0	1942	2935	0	MT-RNR1	rRNA	0	0	1	1
1080	4800	0	A	4788	T	6	1	5	0.12	4788	1944	2844	0	0	0	6	1	5	6	1	5	1944	2844	0	MT-RNR1	rRNA	0	0	1	1
1081	4576	0	T	4575	C	1	0	1	0.02	0	0	0	1	0	1	0	0	0	4575	1875	2700	1875	2700	0	MT-RNR1	rRNA	0	0	1	1
1082	4327	0	A	4325	C	1	0	1	0.02	4325	1930	2395	1	0	1	1	0	1	0	0	0	1930	2395	2	MT-RNR1	rRNA	1	0	1	1
1083	4366	0	C	4365	T	1	0	1	0.02	0	0	0	4365	1844	2521	0	0	0	1	0	1	1844	2521	6	MT-RNR1	rRNA	1	0	1	1
1084	4235	0	C	4233	T	2	0	2	0.05	0	0	0	4233	1736	2497	0	0	0	2	0	2	1736	2497	5	MT-RNR1	rRNA	1	0	1	1
1085	4215	0	C	4214	T	1	0	1	0.02	0	0	0	4214	1751	2463	0	0	0	1	0	1	1751	2463	4	MT-RNR1	rRNA	1	0	1	1
1086	4196	1	C	4187	A	5	0	5	0.12	5	0	5	4187	1750	2437	2	0	2	2	0	2	1750	2437	3	MT-RNR1	rRNA	1	0	1	1
1087	3821	0	A	3785	G	34	0	34	0.89	3785	1703	2082	2	0	2	34	0	34	0	0	0	1703	2082	1	MT-RNR1	rRNA	1	0	1	1
1088	3777	0	C	3764	G	9	2	7	0.24	3	1	2	3764	1685	2079	9	2	7	1	1	0	1685	2079	0	MT-RNR1	rRNA	0	0	1	1
1089	3697	0	T	3687	A	6	2	4	0.16	6	2	4	1	0	1	3	1	2	3687	1656	2031	1656	2031	0	MT-RNR1	rRNA	0	0	1	1
1090	3731	0	A	3727	T	2	2	0	0.05	3727	1701	2026	1	0	1	1	0	1	2	2	0	1701	2026	0	MT-RNR1	rRNA	0	0	1	1
1091	3625	0	T	3621	C	3	3	0	0.08	1	0	1	3	3	0	0	0	0	3621	1613	2008	1613	2008	0	MT-RNR1	rRNA	0	0	1	1
1092	3589	2	G	3589	A	0	0	0	0	0	0	0	0	0	0	3589	1598	1991	0	0	0	1598	1991	0	MT-RNR1	rRNA	0	0	1	1
1093	3279	0	C	3276	A	1	0	1	0.03	1	0	1	3276	1291	1985	1	1	0	1	1	0	1291	1985	0	MT-RNR1	rRNA	0	0	1	1
1094	2976	0	T	2975	C	1	0	1	0.03	0	0	0	1	0	1	0	0	0	2975	1025	1950	1025	1950	0	MT-RNR1	rRNA	0	0	1	1
1095	2920	0	T	2917	C	3	0	3	0.1	0	0	0	3	0	3	0	0	0	2917	1013	1904	1013	1904	0	MT-RNR1	rRNA	0	0	1	1
1096	2862	0	A	2861	G	1	0	1	0.03	2861	982	1879	0	0	0	1	0	1	0	0	0	982	1879	0	MT-RNR1	rRNA	0	0	1	1
1097	2740	0	G	2739	A	1	0	1	0.04	1	0	1	0	0	0	2739	956	1783	0	0	0	956	1783	0	MT-RNR1	rRNA	0	0	1	1
1098	2690	0	C	2689	T	1	0	1	0.04	0	0	0	2689	972	1717	0	0	0	1	0	1	972	1717	0	MT-RNR1	rRNA	0	0	1	1
1099	2326	1	C	2322	T	2	0	2	0.09	1	1	0	2322	880	1442	1	1	0	2	0	2	880	1442	0	MT-RNR1	rRNA	0	0	1	1
1100	2264	0	C	2258	G	3	1	2	0.13	1	1	0	2258	876	1382	3	1	2	2	1	1	876	1382	0	MT-RNR1	rRNA	0	0	1	1
1101	2206	1	T	2122	A	50	2	48	2.27	50	2	48	4	0	4	30	0	30	2122	853	1269	853	1269	0	MT-RNR1	rRNA	0	0	1	1
1102	2122	3	A	2109	G	9	1	8	0.42	2109	847	1262	1	1	0	9	1	8	3	1	2	847	1262	0	MT-RNR1	rRNA	0	0	1	1
1103	2070	0	A	2066	G	3	1	2	0.14	2066	845	1221	1	1	0	3	1	2	0	0	0	845	1221	0	MT-RNR1	rRNA	0	0	1	1
1104	1954	0	A	1954	T	0	0	0	0	1954	781	1173	0	0	0	0	0	0	0	0	0	781	1173	0	MT-RNR1	rRNA	0	0	1	1
1105	1749	0	C	1745	A	2	2	0	0.11	2	2	0	1745	748	997	2	2	0	0	0	0	748	997	0	MT-RNR1	rRNA	0	0	1	1
1106	1456	0	C	1451	A	3	3	0	0.21	3	3	0	1451	757	694	2	2	0	0	0	0	757	694	0	MT-RNR1	rRNA	0	0	1	1
1107	1437	1	T	1412	C	17	1	16	1.18	6	4	2	17	1	16	2	2	0	1412	748	664	748	664	0	MT-RNR1	rRNA	0	0	1	1
1108	1439	0	C	1430	A	3	2	1	0.21	3	2	1	1430	753	677	3	1	2	3	3	0	753	677	0	MT-RNR1	rRNA	0	0	1	1
1109	1231	0	A	1164	G	48	1	47	3.9	1164	596	568	10	1	9	48	1	47	9	2	7	596	568	0	MT-RNR1	rRNA	0	0	1	1
1110	899	0	A	893	T	3	1	2	0.33	893	526	367	1	0	1	2	1	1	3	1	2	526	367	0	MT-RNR1	rRNA	0	1	1	1
1111	730	0	C	720	A	5	4	1	0.68	5	4	1	720	481	239	4	4	0	1	0	1	481	239	0	MT-RNR1	rRNA	0	1	1	1
1112	458	0	A	454	G	4	3	1	0.87	454	379	75	0	0	0	4	3	1	0	0	0	379	75	0	MT-RNR1	rRNA	0	1	1	1
1113	297	0	G	290	A	4	3	1	1.35	4	3	1	0	0	0	290	223	67	3	3	0	223	67	0	MT-RNR1	rRNA	0	1	1	1
1114	250	0	T	242	A	6	3	3	2.4	6	3	3	2	2	0	0	0	0	242	189	53	189	53	0	MT-RNR1	rRNA	0	1	0	1
1115	233	0	T	228	C	3	1	2	1.29	2	2	0	3	1	2	0	0	0	228	177	51	177	51	0	MT-RNR1	rRNA	0	1	1	1
1116	118	0	A	115	G	2	1	1	1.69	115	67	48	0	0	0	2	1	1	1	0	1	67	48	0	MT-RNR1	rRNA	0	1	0	1
1117	45	0	A	44	G	1	0	1	2.22	44	32	12	0	0	0	1	0	1	0	0	0	32	12	0	MT-RNR1	rRNA	0	1	1	1
1118	0	0	N	0	N	0	0	0	0	0	0	0	0	0	0	0	0	0	0	0	0	0	0	0	MT-RNR1	rRNA	0	1	1	1
1119	0	0	N	0	N	0	0	0	0	0	0	0	0	0	0	0	0	0	0	0	0	0	0	0	MT-RNR1	rRNA	0	1	1	1
1120	0	0	N	0	N	0	0	0	0	0	0	0	0	0	0	0	0	0	0	0	0	0	0	0	MT-RNR1	rRNA	0	1	1	1
1121	0	0	N	0	N	0	0	0	0	0	0	0	0	0	0	0	0	0	0	0	0	0	0	0	MT-RNR1	rRNA	0	1	1	1
1122	0	0	N	0	N	0	0	0	0	0	0	0	0	0	0	0	0	0	0	0	0	0	0	0	MT-RNR1	rRNA	0	1	1	1
1123	0	0	N	0	N	0	0	0	0	0	0	0	0	0	0	0	0	0	0	0	0	0	0	0	MT-RNR1	rRNA	0	1	1	1
1124	0	0	N	0	N	0	0	0	0	0	0	0	0	0	0	0	0	0	0	0	0	0	0	0	MT-RNR1	rRNA	0	1	1	1
1125	0	0	N	0	N	0	0	0	0	0	0	0	0	0	0	0	0	0	0	0	0	0	0	0	MT-RNR1	rRNA	0	1	1	1
1126	0	0	N	0	N	0	0	0	0	0	0	0	0	0	0	0	0	0	0	0	0	0	0	0	MT-RNR1	rRNA	0	1	1	1
1127	0	0	N	0	N	0	0	0	0	0	0	0	0	0	0	0	0	0	0	0	0	0	0	0	MT-RNR1	rRNA	0	1	1	1
1128	0	0	N	0	N	0	0	0	0	0	0	0	0	0	0	0	0	0	0	0	0	0	0	0	MT-RNR1	rRNA	0	1	1	1
1129	0	0	N	0	N	0	0	0	0	0	0	0	0	0	0	0	0	0	0	0	0	0	0	0	MT-RNR1	rRNA	0	1	1	1
1130	0	0	N	0	N	0	0	0	0	0	0	0	0	0	0	0	0	0	0	0	0	0	0	0	MT-RNR1	rRNA	0	1	1	1
1131	0	0	N	0	N	0	0	0	0	0	0	0	0	0	0	0	0	0	0	0	0	0	0	0	MT-RNR1	rRNA	0	1	1	1
1132	0	0	N	0	N	0	0	0	0	0	0	0	0	0	0	0	0	0	0	0	0	0	0	0	MT-RNR1	rRNA	0	1	1	1
1133	0	0	N	0	N	0	0	0	0	0	0	0	0	0	0	0	0	0	0	0	0	0	0	0	MT-RNR1	rRNA	0	1	1	1
1134	0	0	N	0	N	0	0	0	0	0	0	0	0	0	0	0	0	0	0	0	0	0	0	0	MT-RNR1	rRNA	0	1	1	1
1135	0	0	N	0	N	0	0	0	0	0	0	0	0	0	0	0	0	0	0	0	0	0	0	0	MT-RNR1	rRNA	0	1	1	1
1136	0	0	N	0	N	0	0	0	0	0	0	0	0	0	0	0	0	0	0	0	0	0	0	0	MT-RNR1	rRNA	0	1	1	1
1137	0	0	N	0	N	0	0	0	0	0	0	0	0	0	0	0	0	0	0	0	0	0	0	0	MT-RNR1	rRNA	0	1	1	1
1138	0	0	N	0	N	0	0	0	0	0	0	0	0	0	0	0	0	0	0	0	0	0	0	0	MT-RNR1	rRNA	0	1	1	1
1139	0	0	N	0	N	0	0	0	0	0	0	0	0	0	0	0	0	0	0	0	0	0	0	0	MT-RNR1	rRNA	0	1	1	1
1140	0	0	N	0	N	0	0	0	0	0	0	0	0	0	0	0	0	0	0	0	0	0	0	0	MT-RNR1	rRNA	0	1	1	1
1141	0	0	N	0	N	0	0	0	0	0	0	0	0	0	0	0	0	0	0	0	0	0	0	0	MT-RNR1	rRNA	0	1	1	1
1142	0	0	N	0	N	0	0	0	0	0	0	0	0	0	0	0	0	0	0	0	0	0	0	0	MT-RNR1	rRNA	0	1	1	1
1143	0	0	N	0	N	0	0	0	0	0	0	0	0	0	0	0	0	0	0	0	0	0	0	0	MT-RNR1	rRNA	0	1	1	1
1144	0	0	N	0	N	0	0	0	0	0	0	0	0	0	0	0	0	0	0	0	0	0	0	0	MT-RNR1	rRNA	0	1	1	1
1145	0	0	N	0	N	0	0	0	0	0	0	0	0	0	0	0	0	0	0	0	0	0	0	0	MT-RNR1	rRNA	0	1	1	1
1146	0	0	N	0	N	0	0	0	0	0	0	0	0	0	0	0	0	0	0	0	0	0	0	0	MT-RNR1	rRNA	0	1	1	1
1147	0	0	N	0	N	0	0	0	0	0	0	0	0	0	0	0	0	0	0	0	0	0	0	0	MT-RNR1	rRNA	0	1	1	1
1148	0	0	N	0	N	0	0	0	0	0	0	0	0	0	0	0	0	0	0	0	0	0	0	0	MT-RNR1	rRNA	0	1	1	1
1149	0	0	N	0	N	0	0	0	0	0	0	0	0	0	0	0	0	0	0	0	0	0	0	0	MT-RNR1	rRNA	0	1	1	1
1150	0	0	N	0	N	0	0	0	0	0	0	0	0	0	0	0	0	0	0	0	0	0	0	0	MT-RNR1	rRNA	0	1	1	1
1151	0	0	N	0	N	0	0	0	0	0	0	0	0	0	0	0	0	0	0	0	0	0	0	0	MT-RNR1	rRNA	0	1	1	1
1152	0	0	N	0	N	0	0	0	0	0	0	0	0	0	0	0	0	0	0	0	0	0	0	0	MT-RNR1	rRNA	0	1	1	1
1153	0	0	N	0	N	0	0	0	0	0	0	0	0	0	0	0	0	0	0	0	0	0	0	0	MT-RNR1	rRNA	0	1	1	1
1154	0	0	N	0	N	0	0	0	0	0	0	0	0	0	0	0	0	0	0	0	0	0	0	0	MT-RNR1	rRNA	0	1	1	1
1155	0	0	N	0	N	0	0	0	0	0	0	0	0	0	0	0	0	0	0	0	0	0	0	0	MT-RNR1	rRNA	0	1	1	1
1156	0	0	N	0	N	0	0	0	0	0	0	0	0	0	0	0	0	0	0	0	0	0	0	0	MT-RNR1	rRNA	0	1	1	1
1157	0	0	N	0	N	0	0	0	0	0	0	0	0	0	0	0	0	0	0	0	0	0	0	0	MT-RNR1	rRNA	0	1	1	1
1158	0	0	N	0	N	0	0	0	0	0	0	0	0	0	0	0	0	0	0	0	0	0	0	0	MT-RNR1	rRNA	0	1	1	1
1159	0	0	N	0	N	0	0	0	0	0	0	0	0	0	0	0	0	0	0	0	0	0	0	0	MT-RNR1	rRNA	0	1	1	1
1160	0	0	N	0	N	0	0	0	0	0	0	0	0	0	0	0	0	0	0	0	0	0	0	0	MT-RNR1	rRNA	0	1	1	1
1161	0	0	N	0	N	0	0	0	0	0	0	0	0	0	0	0	0	0	0	0	0	0	0	0	MT-RNR1	rRNA	0	1	1	1
1162	0	0	N	0	N	0	0	0	0	0	0	0	0	0	0	0	0	0	0	0	0	0	0	0	MT-RNR1	rRNA	0	1	1	1
1163	0	0	N	0	N	0	0	0	0	0	0	0	0	0	0	0	0	0	0	0	0	0	0	0	MT-RNR1	rRNA	0	1	1	1
1164	0	0	N	0	N	0	0	0	0	0	0	0	0	0	0	0	0	0	0	0	0	0	0	0	MT-RNR1	rRNA	0	1	1	1
1165	0	0	N	0	N	0	0	0	0	0	0	0	0	0	0	0	0	0	0	0	0	0	0	0	MT-RNR1	rRNA	0	1	1	1
1166	0	0	N	0	N	0	0	0	0	0	0	0	0	0	0	0	0	0	0	0	0	0	0	0	MT-RNR1	rRNA	0	1	1	1
1167	0	0	N	0	N	0	0	0	0	0	0	0	0	0	0	0	0	0	0	0	0	0	0	0	MT-RNR1	rRNA	0	1	1	1
1168	0	0	N	0	N	0	0	0	0	0	0	0	0	0	0	0	0	0	0	0	0	0	0	0	MT-RNR1	rRNA	0	1	1	1
1169	0	0	N	0	N	0	0	0	0	0	0	0	0	0	0	0	0	0	0	0	0	0	0	0	MT-RNR1	rRNA	0	1	1	1
1170	0	0	N	0	N	0	0	0	0	0	0	0	0	0	0	0	0	0	0	0	0	0	0	0	MT-RNR1	rRNA	0	1	1	1
1171	0	0	N	0	N	0	0	0	0	0	0	0	0	0	0	0	0	0	0	0	0	0	0	0	MT-RNR1	rRNA	0	1	1	1
1172	0	0	N	0	N	0	0	0	0	0	0	0	0	0	0	0	0	0	0	0	0	0	0	0	MT-RNR1	rRNA	0	1	1	1
1173	0	0	N	0	N	0	0	0	0	0	0	0	0	0	0	0	0	0	0	0	0	0	0	0	MT-RNR1	rRNA	0	1	1	1
1174	0	0	N	0	N	0	0	0	0	0	0	0	0	0	0	0	0	0	0	0	0	0	0	0	MT-RNR1	rRNA	0	1	1	1
1175	0	0	N	0	N	0	0	0	0	0	0	0	0	0	0	0	0	0	0	0	0	0	0	0	MT-RNR1	rRNA	0	1	1	1
1176	0	0	N	0	N	0	0	0	0	0	0	0	0	0	0	0	0	0	0	0	0	0	0	0	MT-RNR1	rRNA	0	1	1	1
1177	0	0	N	0	N	0	0	0	0	0	0	0	0	0	0	0	0	0	0	0	0	0	0	0	MT-RNR1	rRNA	0	1	1	1
1178	0	0	N	0	N	0	0	0	0	0	0	0	0	0	0	0	0	0	0	0	0	0	0	0	MT-RNR1	rRNA	0	1	1	1
1179	0	0	N	0	N	0	0	0	0	0	0	0	0	0	0	0	0	0	0	0	0	0	0	0	MT-RNR1	rRNA	0	1	1	1
1180	0	0	N	0	N	0	0	0	0	0	0	0	0	0	0	0	0	0	0	0	0	0	0	0	MT-RNR1	rRNA	0	1	1	1
1181	0	0	N	0	N	0	0	0	0	0	0	0	0	0	0	0	0	0	0	0	0	0	0	0	MT-RNR1	rRNA	0	1	1	1
1182	0	0	N	0	N	0	0	0	0	0	0	0	0	0	0	0	0	0	0	0	0	0	0	0	MT-RNR1	rRNA	0	1	1	1
1183	0	0	N	0	N	0	0	0	0	0	0	0	0	0	0	0	0	0	0	0	0	0	0	0	MT-RNR1	rRNA	0	1	1	1
1184	0	0	N	0	N	0	0	0	0	0	0	0	0	0	0	0	0	0	0	0	0	0	0	0	MT-RNR1	rRNA	0	1	1	1
1185	29	0	C	29	A	0	0	0	0	0	0	0	29	17	12	0	0	0	0	0	0	17	12	0	MT-RNR1	rRNA	0	1	1	1
1186	33	0	A	33	T	0	0	0	0	33	27	6	0	0	0	0	0	0	0	0	0	27	6	0	MT-RNR1	rRNA	0	1	1	1
1187	38	0	T	38	A	0	0	0	0	0	0	0	0	0	0	0	0	0	38	37	1	37	1	0	MT-RNR1	rRNA	0	1	1	1
1188	38	0	A	38	T	0	0	0	0	38	38	0	0	0	0	0	0	0	0	0	0	38	0	2	MT-RNR1	rRNA	1	1	1	1
1189	175	0	C	174	T	1	1	0	0.57	0	0	0	174	104	70	0	0	0	1	1	0	104	70	6	MT-RNR1	rRNA	1	1	1	1
1190	218	0	C	218	A	0	0	0	0	0	0	0	218	119	99	0	0	0	0	0	0	119	99	5	MT-RNR1	rRNA	1	1	1	1
1191	232	0	C	231	T	1	0	1	0.43	0	0	0	231	124	107	0	0	0	1	0	1	124	107	4	MT-RNR1	rRNA	1	1	1	1
1192	265	0	C	265	A	0	0	0	0	0	0	0	265	175	90	0	0	0	0	0	0	175	90	3	MT-RNR1	rRNA	1	1	1	1
1193	271	0	T	271	A	0	0	0	0	0	0	0	0	0	0	0	0	0	271	206	65	206	65	1	MT-RNR1	rRNA	1	1	1	1
1194	328	0	C	328	A	0	0	0	0	0	0	0	328	245	83	0	0	0	0	0	0	245	83	0	MT-RNR1	rRNA	0	1	1	1
1195	299	0	T	299	A	0	0	0	0	0	0	0	0	0	0	0	0	0	299	255	44	255	44	0	MT-RNR1	rRNA	0	1	1	1
1196	360	0	A	360	T	0	0	0	0	360	272	88	0	0	0	0	0	0	0	0	0	272	88	0	MT-RNR1	rRNA	0	1	1	1
1197	383	0	G	383	A	0	0	0	0	0	0	0	0	0	0	383	277	106	0	0	0	277	106	0	MT-RNR1	rRNA	0	1	1	1
1198	377	0	A	377	T	0	0	0	0	377	278	99	0	0	0	0	0	0	0	0	0	278	99	0	MT-RNR1	rRNA	0	1	1	1
1199	505	0	G	505	A	0	0	0	0	0	0	0	0	0	0	505	367	138	0	0	0	367	138	0	MT-RNR1	rRNA	0	1	1	1
1200	523	0	G	523	A	0	0	0	0	0	0	0	0	0	0	523	385	138	0	0	0	385	138	0	MT-RNR1	rRNA	0	1	1	1
1201	566	0	A	563	G	2	1	1	0.35	563	401	162	0	0	0	2	1	1	1	0	1	401	162	0	MT-RNR1	rRNA	0	1	1	1
1202	698	0	G	694	A	3	1	2	0.43	3	1	2	0	0	0	694	470	224	1	0	1	470	224	0	MT-RNR1	rRNA	0	1	1	1
1203	779	0	C	776	T	2	0	2	0.26	1	0	1	776	483	293	0	0	0	2	0	2	483	293	0	MT-RNR1	rRNA	0	1	1	1
1204	947	0	C	947	A	0	0	0	0	0	0	0	947	560	387	0	0	0	0	0	0	560	387	0	MT-RNR1	rRNA	0	1	1	1
1205	965	0	T	965	A	0	0	0	0	0	0	0	0	0	0	0	0	0	965	559	406	559	406	0	MT-RNR1	rRNA	0	1	1	1
1206	1111	0	G	1111	A	0	0	0	0	0	0	0	0	0	0	1111	670	441	0	0	0	670	441	0	MT-RNR1	rRNA	0	0	1	1
1207	1183	0	T	1183	A	0	0	0	0	0	0	0	0	0	0	0	0	0	1183	677	506	677	506	0	MT-RNR1	rRNA	0	0	1	1
1208	1374	0	T	1374	A	0	0	0	0	0	0	0	0	0	0	0	0	0	1374	680	694	680	694	0	MT-RNR1	rRNA	0	0	1	1
1209	1611	0	C	1611	A	0	0	0	0	0	0	0	1611	893	718	0	0	0	0	0	0	893	718	0	MT-RNR1	rRNA	0	0	1	1
1210	1601	0	T	1601	A	0	0	0	0	0	0	0	0	0	0	0	0	0	1601	893	708	893	708	0	MT-RNR1	rRNA	0	0	1	1
1211	1740	0	G	1739	C	1	1	0	0.06	0	0	0	1	1	0	1739	984	755	0	0	0	984	755	0	MT-RNR1	rRNA	0	0	1	1
1212	1776	0	T	1776	A	0	0	0	0	0	0	0	0	0	0	0	0	0	1776	993	783	993	783	0	MT-RNR1	rRNA	0	0	1	1
1213	2096	0	A	2096	T	0	0	0	0	2096	1058	1038	0	0	0	0	0	0	0	0	0	1058	1038	0	MT-RNR1	rRNA	0	0	1	1
1214	2196	0	A	2195	T	1	0	1	0.05	2195	1082	1113	0	0	0	0	0	0	1	0	1	1082	1113	0	MT-RNR1	rRNA	0	0	1	1
1215	2153	0	T	2152	C	1	1	0	0.05	0	0	0	1	1	0	0	0	0	2152	1088	1064	1088	1064	0	MT-RNR1	rRNA	0	0	1	1
1216	2457	0	C	2457	A	0	0	0	0	0	0	0	2457	1211	1246	0	0	0	0	0	0	1211	1246	0	MT-RNR1	rRNA	0	0	1	1
1217	2460	0	G	2459	T	1	1	0	0.04	0	0	0	0	0	0	2459	1256	1203	1	1	0	1256	1203	0	MT-RNR1	rRNA	0	0	1	1
1218	2524	0	A	2523	G	1	0	1	0.04	2523	1271	1252	0	0	0	1	0	1	0	0	0	1271	1252	0	MT-RNR1	rRNA	0	0	1	1
1219	2381	0	T	2381	A	0	0	0	0	0	0	0	0	0	0	0	0	0	2381	1314	1067	1314	1067	0	MT-RNR1	rRNA	0	0	1	1
1220	2586	0	A	2586	T	0	0	0	0	2586	1329	1257	0	0	0	0	0	0	0	0	0	1329	1257	0	MT-RNR1	rRNA	0	0	1	1
1221	1736	0	A	1735	G	1	0	1	0.06	1735	1330	405	0	0	0	1	0	1	0	0	0	1330	405	0	MT-RNR1	rRNA	0	0	1	1
1222	1388	0	A	1378	C	8	1	7	0.58	1378	1332	46	8	1	7	1	0	1	1	1	0	1332	46	2	MT-RNR1	rRNA	1	0	1	1
1223	2907	0	C	2906	G	1	1	0	0.03	0	0	0	2906	1541	1365	1	1	0	0	0	0	1541	1365	6	MT-RNR1	rRNA	1	0	1	1
1224	2961	0	C	2961	A	0	0	0	0	0	0	0	2961	1586	1375	0	0	0	0	0	0	1586	1375	5	MT-RNR1	rRNA	1	0	1	1
1225	2980	0	C	2977	T	3	2	1	0.1	0	0	0	2977	1605	1372	0	0	0	3	2	1	1605	1372	4	MT-RNR1	rRNA	1	0	1	1
1226	2977	0	C	2976	A	1	1	0	0.03	1	1	0	2976	1632	1344	0	0	0	0	0	0	1632	1344	3	MT-RNR1	rRNA	1	0	1	1
1227	2971	0	G	2971	A	0	0	0	0	0	0	0	0	0	0	2971	1663	1308	0	0	0	1663	1308	1	MT-RNR1	rRNA	1	0	1	1
1228	2825	4	A	2824	G	1	1	0	0.04	2824	1684	1140	0	0	0	1	1	0	0	0	0	1684	1140	0	MT-RNR1	rRNA	0	0	1	1
1229	2582	0	T	2580	C	1	1	0	0.04	0	0	0	1	1	0	1	1	0	2580	1689	891	1689	891	0	MT-RNR1	rRNA	0	0	1	1
1230	3034	0	C	3032	G	2	2	0	0.07	0	0	0	3032	1713	1319	2	2	0	0	0	0	1713	1319	0	MT-RNR1	rRNA	0	0	1	1
1231	2967	0	A	2966	G	1	1	0	0.03	2966	1724	1242	0	0	0	1	1	0	0	0	0	1724	1242	0	MT-RNR1	rRNA	0	0	1	1
1232	2189	0	A	2188	G	1	1	0	0.05	2188	1729	459	0	0	0	1	1	0	0	0	0	1729	459	0	MT-RNR1	rRNA	0	0	1	1
1233	3215	0	C	3215	A	0	0	0	0	0	0	0	3215	1823	1392	0	0	0	0	0	0	1823	1392	0	MT-RNR1	rRNA	0	0	1	1
1234	3312	0	C	3311	T	1	1	0	0.03	0	0	0	3311	2040	1271	0	0	0	1	1	0	2040	1271	0	MT-RNR1	rRNA	0	0	1	1
1235	2682	0	T	2680	C	2	2	0	0.07	0	0	0	2	2	0	0	0	0	2680	2078	602	2078	602	0	MT-RNR1	rRNA	0	0	1	1
1236	3254	0	C	3254	A	0	0	0	0	0	0	0	3254	2151	1103	0	0	0	0	0	0	2151	1103	0	MT-RNR1	rRNA	0	0	1	1
1237	2370	0	A	2367	C	2	0	2	0.08	2367	2212	155	2	0	2	1	1	0	0	0	0	2212	155	0	MT-RNR1	rRNA	0	0	1	1
1238	3720	0	C	3719	T	1	0	1	0.03	0	0	0	3719	2277	1442	0	0	0	1	0	1	2277	1442	0	MT-RNR1	rRNA	0	0	1	1
1239	3576	0	C	3575	A	1	0	1	0.03	1	0	1	3575	2302	1273	0	0	0	0	0	0	2302	1273	0	MT-RNR1	rRNA	0	0	1	1
1240	2431	0	A	2423	C	6	0	6	0.25	2423	2304	119	6	0	6	0	0	0	2	1	1	2304	119	0	MT-RNR1	rRNA	0	0	1	1
1241	3840	0	C	3840	A	0	0	0	0	0	0	0	3840	2321	1519	0	0	0	0	0	0	2321	1519	0	MT-RNR1	rRNA	0	0	1	1
1242	3868	0	C	3866	T	1	0	1	0.03	0	0	0	3866	2380	1486	1	0	1	1	0	1	2380	1486	0	MT-RNR1	rRNA	0	0	1	1
1243	3794	0	T	3791	C	2	2	0	0.05	1	0	1	2	2	0	0	0	0	3791	2457	1334	2457	1334	0	MT-RNR1	rRNA	0	0	1	1
1244	4022	0	C	4019	T	3	1	2	0.07	0	0	0	4019	2501	1518	0	0	0	3	1	2	2501	1518	0	MT-RNR1	rRNA	0	0	1	1
1245	4044	0	T	4043	C	1	0	1	0.02	0	0	0	1	0	1	0	0	0	4043	2501	1542	2501	1542	0	MT-RNR1	rRNA	0	0	1	1
1246	3877	0	T	3875	C	2	0	2	0.05	0	0	0	2	0	2	0	0	0	3875	2502	1373	2502	1373	0	MT-RNR1	rRNA	0	0	1	1
1247	3979	0	G	3977	A	1	1	0	0.03	1	1	0	1	1	0	3977	2514	1463	0	0	0	2514	1463	0	MT-RNR1	rRNA	0	0	1	1
1248	4126	0	C	4125	A	1	1	0	0.02	1	1	0	4125	2549	1576	0	0	0	0	0	0	2549	1576	0	MT-RNR1	rRNA	0	0	1	1
1249	4027	0	T	4024	C	3	3	0	0.07	0	0	0	3	3	0	0	0	0	4024	2554	1470	2554	1470	0	MT-RNR1	rRNA	0	0	1	1
1250	4196	0	C	4194	T	2	1	1	0.05	0	0	0	4194	2567	1627	0	0	0	2	1	1	2567	1627	0	MT-RNR1	rRNA	0	0	1	1
1251	4242	0	A	4241	T	1	0	1	0.02	4241	2590	1651	0	0	0	0	0	0	1	0	1	2590	1651	0	MT-RNR1	rRNA	0	0	1	1
1252	4311	0	G	4307	A	2	2	0	0.05	2	2	0	1	1	0	4307	2599	1708	1	0	1	2599	1708	0	MT-RNR1	rRNA	0	0	1	1
1253	4402	0	C	4402	A	0	0	0	0	0	0	0	4402	2621	1781	0	0	0	0	0	0	2621	1781	0	MT-RNR1	rRNA	0	0	1	1
1254	4506	0	C	4502	A	2	1	1	0.04	2	1	1	4502	2658	1844	0	0	0	2	0	2	2658	1844	8	MT-RNR1	rRNA	1	0	1	1
1255	4537	0	T	4535	C	1	0	1	0.02	0	0	0	1	0	1	1	0	1	4535	2672	1863	2672	1863	9	MT-RNR1	rRNA	1	0	1	1
1256	4603	0	A	4601	T	1	0	1	0.02	4601	2673	1928	0	0	0	1	1	0	1	0	1	2673	1928	10	MT-RNR1	rRNA	1	0	1	1
1257	4640	0	T	4638	G	2	1	1	0.04	0	0	0	0	0	0	2	1	1	4638	2707	1931	2707	1931	11	MT-RNR1	rRNA	1	0	1	1
1258	4652	0	A	4650	C	2	1	1	0.04	4650	2711	1939	2	1	1	0	0	0	0	0	0	2711	1939	12	MT-RNR1	rRNA	1	0	1	1
1259	4610	0	T	4609	C	1	1	0	0.02	0	0	0	1	1	0	0	0	0	4609	2716	1893	2716	1893	13	MT-RNR1	rRNA	1	0	1	1
1260	4498	0	A	4494	T	2	0	2	0.04	4494	2717	1777	1	0	1	1	0	1	2	0	2	2717	1777	14	MT-RNR1	rRNA	1	0	1	1
1261	4924	0	C	4922	A	2	1	1	0.04	2	1	1	4922	2917	2005	0	0	0	0	0	0	2917	2005	7	MT-RNR1	rRNA	1	0	1	1
1262	5023	0	C	5018	T	4	2	2	0.08	1	1	0	5018	2986	2032	0	0	0	4	2	2	2986	2032	0	MT-RNR1	rRNA	0	0	1	1
1263	5176	0	G	5171	A	2	0	2	0.04	2	0	2	1	1	0	5171	3081	2090	2	1	1	3081	2090	0	MT-RNR1	rRNA	0	0	1	1
1264	5201	0	C	5198	A	2	1	1	0.04	2	1	1	5198	3092	2106	1	1	0	0	0	0	3092	2106	0	MT-RNR1	rRNA	0	0	1	1
1265	5213	0	C	5210	T	3	1	2	0.06	0	0	0	5210	3101	2109	0	0	0	3	1	2	3101	2109	0	MT-RNR1	rRNA	0	0	1	1
1266	5210	0	A	5209	C	1	0	1	0.02	5209	3102	2107	1	0	1	0	0	0	0	0	0	3102	2107	0	MT-RNR1	rRNA	0	0	1	1
1267	5209	0	T	5208	A	1	0	1	0.02	1	0	1	0	0	0	0	0	0	5208	3102	2106	3102	2106	0	MT-RNR1	rRNA	0	0	1	1
1268	5298	0	C	5298	A	0	0	0	0	0	0	0	5298	3178	2120	0	0	0	0	0	0	3178	2120	0	MT-RNR1	rRNA	0	0	1	1
1269	5310	0	T	5309	C	1	0	1	0.02	0	0	0	1	0	1	0	0	0	5309	3190	2119	3190	2119	0	MT-RNR1	rRNA	0	0	1	1
1270	5307	0	T	5307	A	0	0	0	0	0	0	0	0	0	0	0	0	0	5307	3190	2117	3190	2117	0	MT-RNR1	rRNA	0	0	1	1
1271	5348	0	C	5346	T	2	1	1	0.04	0	0	0	5346	3218	2128	0	0	0	2	1	1	3218	2128	0	MT-RNR1	rRNA	0	0	1	1
1272	5442	0	A	5439	G	2	1	1	0.04	5439	3285	2154	1	0	1	2	1	1	0	0	0	3285	2154	0	MT-RNR1	rRNA	0	0	1	1
1273	5615	0	G	5609	A	3	1	2	0.05	3	1	2	1	0	1	5609	3361	2248	2	0	2	3361	2248	0	MT-RNR1	rRNA	0	0	1	1
1274	5909	0	C	5906	A	2	0	2	0.03	2	0	2	5906	3441	2465	1	0	1	0	0	0	3441	2465	0	MT-RNR1	rRNA	0	0	1	1
1275	5924	0	A	5921	T	3	0	3	0.05	5921	3449	2472	0	0	0	0	0	0	3	0	3	3449	2472	0	MT-RNR1	rRNA	0	0	1	1
1276	5936	0	A	5932	C	4	2	2	0.07	5932	3438	2494	4	2	2	0	0	0	0	0	0	3438	2494	0	MT-RNR1	rRNA	0	0	1	1
1277	5879	0	A	5875	T	2	0	2	0.03	5875	3441	2434	1	1	0	1	1	0	2	0	2	3441	2434	0	MT-RNR1	rRNA	0	0	1	1
1278	6019	0	C	6016	T	2	1	1	0.03	1	1	0	6016	3489	2527	0	0	0	2	1	1	3489	2527	0	MT-RNR1	rRNA	0	0	1	1
1279	6047	0	C	6046	A	1	0	1	0.02	1	0	1	6046	3489	2557	0	0	0	0	0	0	3489	2557	0	MT-RNR1	rRNA	0	0	1	1
1280	6093	0	C	6090	T	3	2	1	0.05	0	0	0	6090	3502	2588	0	0	0	3	2	1	3502	2588	0	MT-RNR1	rRNA	0	0	1	1
1281	6542	0	T	6542	A	0	0	0	0	0	0	0	0	0	0	0	0	0	6542	3509	3033	3509	3033	0	MT-RNR1	rRNA	0	0	1	1
1282	6652	0	G	6650	A	1	0	1	0.02	1	0	1	1	0	1	6650	3522	3128	0	0	0	3522	3128	0	MT-RNR1	rRNA	0	0	1	1
1283	6716	0	A	6715	G	1	0	1	0.01	6715	3530	3185	0	0	0	1	0	1	0	0	0	3530	3185	0	MT-RNR1	rRNA	0	0	1	1
1284	6741	0	T	6740	C	1	0	1	0.01	0	0	0	1	0	1	0	0	0	6740	3539	3201	3539	3201	0	MT-RNR1	rRNA	0	0	1	1
1285	6757	0	G	6754	A	1	1	0	0.01	1	1	0	1	1	0	6754	3554	3200	1	0	1	3554	3200	0	MT-RNR1	rRNA	0	0	1	1
1286	6819	0	A	6818	G	1	1	0	0.01	6818	3562	3256	0	0	0	1	1	0	0	0	0	3562	3256	0	MT-RNR1	rRNA	0	0	1	1
1287	6819	0	A	6817	G	2	1	1	0.03	6817	3558	3259	0	0	0	2	1	1	0	0	0	3558	3259	0	MT-RNR1	rRNA	0	0	1	1
1288	6826	0	G	6823	A	2	1	1	0.03	2	1	1	1	0	1	6823	3555	3268	0	0	0	3555	3268	0	MT-RNR1	rRNA	0	0	1	1
1289	6862	0	G	6855	C	4	1	3	0.06	2	2	0	4	1	3	6855	3499	3356	1	0	1	3499	3356	0	MT-RNR1	rRNA	0	0	1	1
1290	6756	0	C	6742	T	8	2	6	0.12	5	2	3	6742	3356	3386	1	1	0	8	2	6	3356	3386	0	MT-RNR1	rRNA	0	0	1	1
1291	7065	0	T	7061	A	2	2	0	0.03	2	2	0	1	1	0	1	1	0	7061	3690	3371	3690	3371	0	MT-RNR1	rRNA	0	0	1	1
1292	7105	0	A	7100	T	2	2	0	0.03	7100	3701	3399	2	0	2	1	1	0	2	2	0	3701	3399	0	MT-RNR1	rRNA	0	0	1	1
1293	7189	0	C	7185	T	4	0	4	0.06	0	0	0	7185	3731	3454	0	0	0	4	0	4	3731	3454	0	MT-RNR1	rRNA	0	0	1	1
1294	7243	0	A	7239	G	3	2	1	0.04	7239	3702	3537	1	0	1	3	2	1	0	0	0	3702	3537	0	MT-RNR1	rRNA	0	0	1	1
1295	7286	0	A	7285	C	1	1	0	0.01	7285	3714	3571	1	1	0	0	0	0	0	0	0	3714	3571	0	MT-RNR1	rRNA	0	0	1	1
1296	7356	2	A	7352	T	2	1	1	0.03	7352	3706	3646	1	1	0	1	1	0	2	1	1	3706	3646	0	MT-RNR1	rRNA	0	0	1	1
1297	7497	0	G	7492	T	2	2	0	0.03	1	0	1	2	1	1	7492	3787	3705	2	2	0	3787	3705	0	MT-RNR1	rRNA	0	0	1	1
1298	7353	0	T	7348	C	3	2	1	0.04	2	1	1	3	2	1	0	0	0	7348	3675	3673	3675	3673	0	MT-RNR1	rRNA	0	0	1	1
1299	7393	0	A	7390	G	2	2	0	0.03	7390	3701	3689	1	1	0	2	2	0	0	0	0	3701	3689	0	MT-RNR1	rRNA	0	0	1	1
1300	7408	0	A	7406	T	1	1	0	0.01	7406	3724	3682	1	1	0	0	0	0	1	1	0	3724	3682	0	MT-RNR1	rRNA	0	0	1	1
1301	7393	0	G	7390	A	1	1	0	0.01	1	1	0	1	0	1	7390	3740	3650	1	0	1	3740	3650	0	MT-RNR1	rRNA	0	0	1	1
1302	7293	0	C	7286	A	6	5	1	0.08	6	5	1	7286	3729	3557	0	0	0	1	0	1	3729	3557	0	MT-RNR1	rRNA	0	0	1	1
1303	7225	0	G	7221	A	2	1	1	0.03	2	1	1	2	1	1	7221	3711	3510	0	0	0	3711	3510	0	MT-RNR1	rRNA	0	0	1	1
1304	7116	0	C	7106	A	6	3	3	0.08	6	3	3	7106	3718	3388	0	0	0	4	4	0	3718	3388	0	MT-RNR1	rRNA	0	0	1	1
1305	7097	0	A	7078	G	15	1	14	0.21	7078	3723	3355	2	1	1	15	1	14	2	2	0	3723	3355	0	MT-RNR1	rRNA	0	0	1	1
1306	6963	0	A	6960	C	3	3	0	0.04	6960	3613	3347	3	3	0	0	0	0	0	0	0	3613	3347	0	MT-RNR1	rRNA	0	0	1	1
1307	6941	0	G	6936	C	3	2	1	0.04	2	2	0	3	2	1	6936	3607	3329	0	0	0	3607	3329	0	MT-RNR1	rRNA	0	0	1	1
1308	6541	0	T	6524	A	11	8	3	0.17	11	8	3	2	0	2	4	3	1	6524	3487	3037	3487	3037	0	MT-RNR1	rRNA	0	0	1	1
1309	6293	0	A	6287	G	4	4	0	0.06	6287	3393	2894	1	0	1	4	4	0	1	0	1	3393	2894	0	MT-RNR1	rRNA	0	0	1	1
1310	6513	0	C	6508	A	3	3	0	0.05	3	3	0	6508	3434	3074	0	0	0	2	0	2	3434	3074	0	MT-RNR1	rRNA	0	0	1	1
1311	6441	0	C	6438	T	3	2	1	0.05	0	0	0	6438	3344	3094	0	0	0	3	2	1	3344	3094	0	MT-RNR1	rRNA	0	0	1	1
1312	6427	0	C	6421	A	4	2	2	0.06	4	2	2	6421	3403	3018	0	0	0	2	1	1	3403	3018	0	MT-RNR1	rRNA	0	0	1	1
1313	6190	0	A	6176	G	12	3	9	0.19	6176	3338	2838	2	1	1	12	3	9	0	0	0	3338	2838	0	MT-RNR1	rRNA	0	0	1	1
1314	6103	0	C	6089	G	6	2	4	0.1	4	2	2	6089	3348	2741	6	2	4	4	3	1	3348	2741	0	MT-RNR1	rRNA	0	0	1	1
1315	6032	0	G	6019	A	10	8	2	0.17	10	8	2	2	0	2	6019	3351	2668	1	1	0	3351	2668	0	MT-RNR1	rRNA	0	0	1	1
1316	5924	0	T	5912	A	7	1	6	0.12	7	1	6	2	0	2	3	2	1	5912	3249	2663	3249	2663	0	MT-RNR1	rRNA	0	0	1	1
1317	6005	0	A	6000	G	4	1	3	0.07	6000	3331	2669	0	0	0	4	1	3	1	1	0	3331	2669	0	MT-RNR1	rRNA	0	0	1	1
1318	6059	0	A	6057	C	1	1	0	0.02	6057	3375	2682	1	1	0	1	0	1	0	0	0	3375	2682	0	MT-RNR1	rRNA	0	0	1	1
1319	6044	0	A	6036	G	6	1	5	0.1	6036	3327	2709	0	0	0	6	1	5	2	1	1	3327	2709	0	MT-RNR1	rRNA	0	0	1	1
1320	6051	0	G	6050	C	1	0	1	0.02	0	0	0	1	0	1	6050	3334	2716	0	0	0	3334	2716	0	MT-RNR1	rRNA	0	0	1	1
1321	5989	0	A	5988	T	1	0	1	0.02	5988	3311	2677	0	0	0	0	0	0	1	0	1	3311	2677	0	MT-RNR1	rRNA	0	0	1	1
1322	6112	0	C	6109	T	2	0	2	0.03	1	1	0	6109	3378	2731	0	0	0	2	0	2	3378	2731	0	MT-RNR1	rRNA	0	0	1	1
1323	6226	0	G	6222	T	2	1	1	0.03	1	1	0	1	0	1	6222	3292	2930	2	1	1	3292	2930	0	MT-RNR1	rRNA	0	0	1	1
1324	6235	0	T	6232	G	2	1	1	0.03	0	0	0	1	0	1	2	1	1	6232	3227	3005	3227	3005	0	MT-RNR1	rRNA	0	0	1	1
1325	6305	0	T	6300	A	2	1	1	0.03	2	1	1	1	0	1	2	2	0	6300	3225	3075	3225	3075	0	MT-RNR1	rRNA	0	0	1	1
1326	6293	0	A	6291	T	2	1	1	0.03	6291	3205	3086	0	0	0	0	0	0	2	1	1	3205	3086	0	MT-RNR1	rRNA	0	0	1	1
1327	6274	0	G	6271	T	2	2	0	0.03	0	0	0	1	1	0	6271	3178	3093	2	2	0	3178	3093	0	MT-RNR1	rRNA	0	0	1	1
1328	6312	0	G	6309	T	2	1	1	0.03	1	1	0	0	0	0	6309	3216	3093	2	1	1	3216	3093	0	MT-RNR1	rRNA	0	0	1	1
1329	6249	0	T	6247	C	1	0	1	0.02	0	0	0	1	0	1	1	1	0	6247	3149	3098	3149	3098	0	MT-RNR1	rRNA	0	0	1	1
1330	6633	0	C	6628	A	2	0	2	0.03	2	0	2	6628	3279	3349	1	0	1	2	0	2	3279	3349	0	MT-RNR1	rRNA	0	0	1	1
1331	6640	0	A	6638	T	1	0	1	0.02	6638	3283	3355	1	1	0	0	0	0	1	0	1	3283	3355	0	MT-RNR1	rRNA	0	0	1	1
1332	6672	0	A	6668	C	2	1	1	0.03	6668	3286	3382	2	1	1	1	0	1	1	0	1	3286	3382	0	MT-RNR1	rRNA	0	0	1	1
1333	6597	0	G	6593	T	3	1	2	0.05	0	0	0	1	0	1	6593	3205	3388	3	1	2	3205	3388	0	MT-RNR1	rRNA	0	0	1	1
1334	6385	0	G	6381	A	3	2	1	0.05	3	2	1	0	0	0	6381	3011	3370	1	0	1	3011	3370	0	MT-RNR1	rRNA	0	0	1	1
1335	6112	0	T	6104	A	4	4	0	0.07	4	4	0	3	1	2	1	0	1	6104	2744	3360	2744	3360	0	MT-RNR1	rRNA	0	0	1	1
1336	6293	0	G	6290	T	2	1	1	0.03	1	1	0	0	0	0	6290	2914	3376	2	1	1	2914	3376	0	MT-RNR1	rRNA	0	0	1	1
1337	6198	2	T	6189	C	4	0	4	0.06	3	3	0	4	0	4	2	2	0	6189	2788	3401	2788	3401	0	MT-RNR1	rRNA	0	0	1	1
1338	6237	0	A	6232	C	3	3	0	0.05	6232	2826	3406	3	3	0	1	0	1	1	1	0	2826	3406	0	MT-RNR1	rRNA	0	0	1	1
1339	6230	0	G	6225	A	2	1	1	0.03	2	1	1	2	1	1	6225	2816	3409	1	0	1	2816	3409	0	MT-RNR1	rRNA	0	0	1	1
1340	6250	0	C	6244	G	3	3	0	0.05	2	1	1	6244	2829	3415	3	3	0	1	0	1	2829	3415	0	MT-RNR1	rRNA	0	0	1	1
1341	6324	0	C	6320	A	2	2	0	0.03	2	2	0	6320	2860	3460	0	0	0	2	0	2	2860	3460	0	MT-RNR1	rRNA	0	0	1	1
1342	6382	0	C	6372	T	5	3	2	0.08	1	1	0	6372	2835	3537	4	1	3	5	3	2	2835	3537	0	MT-RNR1	rRNA	0	0	1	1
1343	6382	0	A	6372	G	9	0	9	0.14	6372	2781	3591	1	0	1	9	0	9	0	0	0	2781	3591	0	MT-RNR1	rRNA	0	0	1	1
1344	6352	0	T	6351	G	1	0	1	0.02	0	0	0	0	0	0	1	0	1	6351	2762	3589	2762	3589	0	MT-RNR1	rRNA	0	0	1	1
1345	6357	0	G	6354	A	1	1	0	0.02	1	1	0	1	0	1	6354	2775	3579	1	0	1	2775	3579	0	MT-RNR1	rRNA	0	0	1	1
1346	6382	0	A	6380	T	2	0	2	0.03	6380	2765	3615	0	0	0	0	0	0	2	0	2	2765	3615	0	MT-RNR1	rRNA	0	0	1	1
1347	6432	0	G	6429	A	2	1	1	0.03	2	1	1	1	1	0	6429	2759	3670	0	0	0	2759	3670	0	MT-RNR1	rRNA	0	0	1	1
1348	6458	0	G	6457	A	1	0	1	0.02	1	0	1	0	0	0	6457	2737	3720	0	0	0	2737	3720	0	MT-RNR1	rRNA	0	0	1	1
1349	6262	0	T	6249	C	11	0	11	0.18	0	0	0	11	0	11	2	0	2	6249	2553	3696	2553	3696	0	MT-RNR1	rRNA	0	0	1	1
1350	6421	0	G	6418	A	2	0	2	0.03	2	0	2	0	0	0	6418	2715	3703	1	0	1	2715	3703	0	MT-RNR1	rRNA	0	0	1	1
1351	6430	0	G	6425	A	3	1	2	0.05	3	1	2	1	1	0	6425	2721	3704	1	1	0	2721	3704	0	MT-RNR1	rRNA	0	0	1	1
1352	6507	0	C	6497	A	4	0	4	0.06	4	0	4	6497	2843	3654	2	1	1	4	2	2	2843	3654	0	MT-RNR1	rRNA	0	0	1	1
1353	6424	0	A	6381	G	36	2	34	0.56	6381	2835	3546	3	0	3	36	2	34	4	0	4	2835	3546	0	MT-RNR1	rRNA	0	0	1	1
1354	6323	0	A	6312	G	10	1	9	0.16	6312	2800	3512	0	0	0	10	1	9	1	1	0	2800	3512	0	MT-RNR1	rRNA	0	0	1	1
1355	6380	0	G	6379	A	1	1	0	0.02	1	1	0	0	0	0	6379	2877	3502	0	0	0	2877	3502	0	MT-RNR1	rRNA	0	0	1	1
1356	6371	0	A	6366	G	3	1	2	0.05	6366	2932	3434	1	1	0	3	1	2	1	0	1	2932	3434	0	MT-RNR1	rRNA	0	0	1	1
1357	6340	0	A	6335	G	3	1	2	0.05	6335	2909	3426	0	0	0	3	1	2	2	2	0	2909	3426	0	MT-RNR1	rRNA	0	0	1	1
1358	6420	0	A	6416	C	3	2	1	0.05	6416	2981	3435	3	2	1	0	0	0	1	1	0	2981	3435	0	MT-RNR1	rRNA	0	0	1	1
1359	6391	0	T	6387	C	2	1	1	0.03	0	0	0	2	1	1	2	2	0	6387	2972	3415	2972	3415	0	MT-RNR1	rRNA	0	0	1	1
1360	6441	0	G	6440	A	1	1	0	0.02	1	1	0	0	0	0	6440	3031	3409	0	0	0	3031	3409	0	MT-RNR1	rRNA	0	0	1	1
1361	6355	0	G	6352	A	2	1	1	0.03	2	1	1	1	0	1	6352	2833	3519	0	0	0	2833	3519	0	MT-RNR1	rRNA	0	0	1	1
1362	6285	0	G	6280	C	4	1	3	0.06	0	0	0	4	1	3	6280	2774	3506	1	0	1	2774	3506	0	MT-RNR1	rRNA	0	0	1	1
1363	6161	0	C	6157	A	2	1	1	0.03	2	1	1	6157	2705	3452	0	0	0	2	2	0	2705	3452	0	MT-RNR1	rRNA	0	0	1	1
1364	6190	0	T	6184	G	5	1	4	0.08	1	0	1	0	0	0	5	1	4	6184	2702	3482	2702	3482	0	MT-RNR1	rRNA	0	0	1	1
1365	6315	0	A	6311	G	3	1	2	0.05	6311	2718	3593	1	0	1	3	1	2	0	0	0	2718	3593	0	MT-RNR1	rRNA	0	0	1	1
1366	6546	0	C	6541	T	4	0	4	0.06	1	0	1	6541	2701	3840	0	0	0	4	0	4	2701	3840	0	MT-RNR1	rRNA	0	0	1	1
1367	6606	0	A	6602	G	2	1	1	0.03	6602	2762	3840	1	0	1	2	1	1	1	0	1	2762	3840	2	MT-RNR1	rRNA	1	0	1	1
1368	6596	0	T	6592	C	4	3	1	0.06	0	0	0	4	3	1	0	0	0	6592	2712	3880	2712	3880	6	MT-RNR1	rRNA	1	0	1	1
1369	6633	0	T	6631	A	1	0	1	0.02	1	0	1	0	0	0	1	0	1	6631	2732	3899	2732	3899	5	MT-RNR1	rRNA	1	0	1	1
1370	6659	0	T	6659	A	0	0	0	0	0	0	0	0	0	0	0	0	0	6659	2750	3909	2750	3909	4	MT-RNR1	rRNA	1	0	1	1
1371	6625	0	T	6625	A	0	0	0	0	0	0	0	0	0	0	0	0	0	6625	2723	3902	2723	3902	3	MT-RNR1	rRNA	1	0	1	1
1372	6546	0	C	6542	T	3	2	1	0.05	1	1	0	6542	2663	3879	0	0	0	3	2	1	2663	3879	1	MT-RNR1	rRNA	1	0	1	1
1373	6384	0	T	6382	C	2	2	0	0.03	0	0	0	2	2	0	0	0	0	6382	2583	3799	2583	3799	0	MT-RNR1	rRNA	0	0	1	1
1374	6029	0	A	6020	C	4	3	1	0.07	6020	2506	3514	4	3	1	3	1	2	2	1	1	2506	3514	2	MT-RNR1	rRNA	1	0	1	1
1375	6112	2	C	6109	T	2	0	2	0.03	0	0	0	6109	2497	3612	1	1	0	2	0	2	2497	3612	6	MT-RNR1	rRNA	1	0	1	1
1376	6123	0	C	6119	A	2	1	1	0.03	2	1	1	6119	2497	3622	0	0	0	2	1	1	2497	3622	5	MT-RNR1	rRNA	1	0	1	1
1377	6377	0	C	6371	T	5	2	3	0.08	1	0	1	6371	2488	3883	0	0	0	5	2	3	2488	3883	4	MT-RNR1	rRNA	1	0	1	1
1378	6448	0	C	6444	A	2	0	2	0.03	2	0	2	6444	2502	3942	0	0	0	2	1	1	2502	3942	3	MT-RNR1	rRNA	1	0	1	1
1379	6427	0	A	6407	G	14	1	13	0.22	6407	2493	3914	0	0	0	14	1	13	6	0	6	2493	3914	1	MT-RNR1	rRNA	1	0	1	1
1380	6447	0	G	6440	T	3	1	2	0.05	2	1	1	2	0	2	6440	2505	3935	3	1	2	2505	3935	2	MT-RNR1	rRNA	1	0	1	1
1381	6015	0	A	5998	G	16	0	16	0.27	5998	2514	3484	0	0	0	16	0	16	1	0	1	2514	3484	6	MT-RNR1	rRNA	1	0	1	1
1382	5928	0	A	5917	G	9	2	7	0.15	5917	2496	3421	0	0	0	9	2	7	2	0	2	2496	3421	5	MT-RNR1	rRNA	1	0	1	1
1383	5845	1	A	5838	G	4	3	1	0.07	5838	2473	3365	3	1	2	4	3	1	0	0	0	2473	3365	4	MT-RNR1	rRNA	1	0	1	1
1384	5804	0	A	5799	T	3	1	2	0.05	5799	2470	3329	1	0	1	1	0	1	3	1	2	2470	3329	3	MT-RNR1	rRNA	1	0	1	1
1385	5966	0	C	5959	T	6	2	4	0.1	0	0	0	5959	2557	3402	1	1	0	6	2	4	2557	3402	1	MT-RNR1	rRNA	1	0	1	1
1386	5901	0	T	5893	A	3	3	0	0.05	3	3	0	3	0	3	2	0	2	5893	2550	3343	2550	3343	0	MT-RNR1	rRNA	0	0	1	1
1387	5970	0	A	5961	G	4	4	0	0.07	5961	2535	3426	2	1	1	4	4	0	3	1	2	2535	3426	0	MT-RNR1	rRNA	0	0	1	1
1388	6031	1	C	6024	A	4	3	1	0.07	4	3	1	6024	2557	3467	1	1	0	2	1	1	2557	3467	0	MT-RNR1	rRNA	0	0	1	1
1389	5922	1	G	5913	A	6	4	2	0.1	6	4	2	0	0	0	5913	2557	3356	3	2	1	2557	3356	0	MT-RNR1	rRNA	0	0	1	1
1390	5989	0	A	5981	G	6	3	3	0.1	5981	2447	3534	2	2	0	6	3	3	0	0	0	2447	3534	0	MT-RNR1	rRNA	0	0	1	1
1391	5868	0	T	5841	A	19	2	17	0.32	19	2	17	4	0	4	4	1	3	5841	2328	3513	2328	3513	0	MT-RNR1	rRNA	0	0	1	1
1392	5841	0	A	5836	C	3	1	2	0.05	5836	2307	3529	3	1	2	1	0	1	1	0	1	2307	3529	0	MT-RNR1	rRNA	0	0	1	1
1393	5854	0	G	5848	A	3	0	3	0.05	3	0	3	1	1	0	5848	2278	3570	2	1	1	2278	3570	0	MT-RNR1	rRNA	0	0	1	1
1394	5852	0	C	5846	T	4	1	3	0.07	0	0	0	5846	2265	3581	2	1	1	4	1	3	2265	3581	0	MT-RNR1	rRNA	0	0	1	1
1395	5829	0	C	5824	A	4	2	2	0.07	4	2	2	5824	2278	3546	1	0	1	0	0	0	2278	3546	0	MT-RNR1	rRNA	0	0	1	1
1396	5776	0	C	5772	A	3	0	3	0.05	3	0	3	5772	2284	3488	0	0	0	1	0	1	2284	3488	0	MT-RNR1	rRNA	0	0	1	1
1397	5664	0	T	5646	A	8	4	4	0.14	8	4	4	2	0	2	8	0	8	5646	2205	3441	2205	3441	0	MT-RNR1	rRNA	0	0	1	1
1398	5660	0	T	5654	G	4	4	0	0.07	2	0	2	0	0	0	4	4	0	5654	2199	3455	2199	3455	0	MT-RNR1	rRNA	0	0	1	1
1399	5704	0	A	5703	T	1	0	1	0.02	5703	2234	3469	0	0	0	0	0	0	1	0	1	2234	3469	0	MT-RNR1	rRNA	0	0	1	1
1400	5729	0	T	5729	A	0	0	0	0	0	0	0	0	0	0	0	0	0	5729	2244	3485	2244	3485	0	MT-RNR1	rRNA	0	0	1	1
1401	5743	0	G	5738	C	4	4	0	0.07	1	1	0	4	4	0	5738	2242	3496	0	0	0	2242	3496	0	MT-RNR1	rRNA	0	0	1	1
1402	5676	0	A	5673	G	3	3	0	0.05	5673	2187	3486	0	0	0	3	3	0	0	0	0	2187	3486	0	MT-RNR1	rRNA	0	0	1	1
1403	5667	0	A	5663	G	3	2	1	0.05	5663	2185	3478	0	0	0	3	2	1	1	0	1	2185	3478	0	MT-RNR1	rRNA	0	0	1	1
1404	5598	0	A	5597	G	1	0	1	0.02	5597	2120	3477	0	0	0	1	0	1	0	0	0	2120	3477	0	MT-RNR1	rRNA	0	0	1	1
1405	5700	0	C	5699	A	1	1	0	0.02	1	1	0	5699	2156	3543	0	0	0	0	0	0	2156	3543	0	MT-RNR1	rRNA	0	0	1	1
1406	5670	0	T	5669	G	1	1	0	0.02	0	0	0	0	0	0	1	1	0	5669	2153	3516	2153	3516	0	MT-RNR1	rRNA	0	0	1	1
1407	5673	0	T	5671	A	1	1	0	0.02	1	1	0	1	1	0	0	0	0	5671	2150	3521	2150	3521	0	MT-RNR1	rRNA	0	0	1	1
1408	5666	0	A	5664	T	1	1	0	0.02	5664	2142	3522	0	0	0	1	0	1	1	1	0	2142	3522	0	MT-RNR1	rRNA	0	0	1	1
1409	5675	0	A	5673	T	1	1	0	0.02	5673	2143	3530	1	1	0	0	0	0	1	1	0	2143	3530	0	MT-RNR1	rRNA	0	0	1	1
1410	5617	0	G	5616	T	1	1	0	0.02	0	0	0	0	0	0	5616	2119	3497	1	1	0	2119	3497	0	MT-RNR1	rRNA	0	0	1	1
1411	5564	0	G	5563	T	1	0	1	0.02	0	0	0	0	0	0	5563	2117	3446	1	0	1	2117	3446	0	MT-RNR1	rRNA	0	0	1	1
1412	5494	0	G	5493	A	1	1	0	0.02	1	1	0	0	0	0	5493	2052	3441	0	0	0	2052	3441	0	MT-RNR1	rRNA	0	0	1	1
1413	5363	0	T	5357	C	3	0	3	0.06	2	0	2	3	0	3	1	1	0	5357	1936	3421	1936	3421	0	MT-RNR1	rRNA	0	0	1	1
1414	5454	0	C	5452	T	2	0	2	0.04	0	0	0	5452	2010	3442	0	0	0	2	0	2	2010	3442	0	MT-RNR1	rRNA	0	0	1	1
1415	5438	0	G	5438	A	0	0	0	0	0	0	0	0	0	0	5438	1991	3447	0	0	0	1991	3447	0	MT-RNR1	rRNA	0	0	1	1
1416	5315	0	A	5312	T	1	1	0	0.02	5312	1891	3421	1	1	0	1	0	1	1	1	0	1891	3421	0	MT-RNR1	rRNA	0	0	1	1
1417	5239	0	A	5238	G	1	0	1	0.02	5238	1828	3410	0	0	0	1	0	1	0	0	0	1828	3410	0	MT-RNR1	rRNA	0	0	1	1
1418	5199	0	G	5198	A	1	0	1	0.02	1	0	1	0	0	0	5198	1799	3399	0	0	0	1799	3399	0	MT-RNR1	rRNA	0	0	1	1
1419	5160	0	G	5154	A	4	1	3	0.08	4	1	3	1	1	0	5154	1791	3363	1	0	1	1791	3363	0	MT-RNR1	rRNA	0	0	1	1
1420	4757	0	T	4751	C	4	0	4	0.08	1	0	1	4	0	4	1	1	0	4751	1398	3353	1398	3353	0	MT-RNR1	rRNA	0	0	1	1
1421	5109	0	G	5107	A	2	1	1	0.04	2	1	1	0	0	0	5107	1761	3346	0	0	0	1761	3346	0	MT-RNR1	rRNA	0	0	1	1
1422	5064	0	G	5059	A	4	2	2	0.08	4	2	2	0	0	0	5059	1732	3327	1	0	1	1732	3327	0	MT-RNR1	rRNA	0	0	1	1
1423	4685	0	A	4655	G	26	1	25	0.55	4655	1590	3065	1	0	1	26	1	25	3	0	3	1590	3065	0	MT-RNR1	rRNA	0	0	1	1
1424	4591	0	T	4550	A	21	2	19	0.46	21	2	19	5	0	5	15	1	14	4550	1592	2958	1592	2958	0	MT-RNR1	rRNA	0	0	1	1
1425	4518	0	T	4514	G	2	1	1	0.04	1	1	0	1	1	0	2	1	1	4514	1604	2910	1604	2910	0	MT-RNR1	rRNA	0	0	1	1
1426	4508	0	T	4507	A	1	1	0	0.02	1	1	0	0	0	0	0	0	0	4507	1600	2907	1600	2907	0	MT-RNR1	rRNA	0	0	1	1
1427	4497	0	A	4495	T	1	1	0	0.02	4495	1591	2904	1	1	0	0	0	0	1	1	0	1591	2904	0	MT-RNR1	rRNA	0	0	1	1
1428	4442	0	G	4442	A	0	0	0	0	0	0	0	0	0	0	4442	1543	2899	0	0	0	1543	2899	0	MT-RNR1	rRNA	0	0	1	1
1429	4381	0	C	4380	G	1	1	0	0.02	0	0	0	4380	1497	2883	1	1	0	0	0	0	1497	2883	0	MT-RNR1	rRNA	0	0	1	1
1430	4065	0	A	4063	C	1	1	0	0.02	4063	1440	2623	1	1	0	1	0	1	0	0	0	1440	2623	0	MT-RNR1	rRNA	0	0	1	1
1431	4056	0	G	4056	A	0	0	0	0	0	0	0	0	0	0	4056	1430	2626	0	0	0	1430	2626	0	MT-RNR1	rRNA	0	0	1	1
1432	4008	0	T	3995	A	7	0	7	0.17	7	0	7	4	1	3	2	0	2	3995	1407	2588	1407	2588	0	MT-RNR1	rRNA	0	0	1	1
1433	4014	0	A	4010	G	3	0	3	0.07	4010	1420	2590	0	0	0	3	0	3	1	0	1	1420	2590	0	MT-RNR1	rRNA	0	0	1	1
1434	3975	0	A	3972	T	2	0	2	0.05	3972	1392	2580	1	0	1	0	0	0	2	0	2	1392	2580	0	MT-RNR1	rRNA	0	0	1	1
1435	3946	0	A	3940	T	3	1	2	0.08	3940	1383	2557	2	0	2	1	0	1	3	1	2	1383	2557	0	MT-RNR1	rRNA	0	0	1	1
1436	3925	0	C	3920	T	5	0	5	0.13	0	0	0	3920	1351	2569	0	0	0	5	0	5	1351	2569	0	MT-RNR1	rRNA	0	0	1	1
1437	3911	2	T	3908	C	2	0	2	0.05	0	0	0	2	0	2	1	1	0	3908	1371	2537	1371	2537	0	MT-RNR1	rRNA	0	0	1	1
1438	3914	0	G	3911	A	3	1	2	0.08	3	1	2	0	0	0	3911	1364	2547	0	0	0	1364	2547	0	MT-RNR1	rRNA	0	0	1	1
1439	3905	0	A	3900	G	4	1	3	0.1	3900	1360	2540	1	0	1	4	1	3	0	0	0	1360	2540	0	MT-RNR1	rRNA	0	0	1	1
1440	3884	0	G	3882	A	1	1	0	0.03	1	1	0	0	0	0	3882	1355	2527	1	1	0	1355	2527	0	MT-RNR1	rRNA	0	0	1	1
1441	3744	0	A	3739	G	4	1	3	0.11	3739	1311	2428	0	0	0	4	1	3	1	0	1	1311	2428	0	MT-RNR1	rRNA	0	0	1	1
1442	3658	0	G	3653	A	3	0	3	0.08	3	0	3	0	0	0	3653	1296	2357	2	2	0	1296	2357	0	MT-RNR1	rRNA	0	0	1	1
1443	3478	0	T	3474	A	4	1	3	0.12	4	1	3	0	0	0	0	0	0	3474	1178	2296	1178	2296	0	MT-RNR1	rRNA	0	0	1	1
1444	3557	0	A	3555	T	1	0	1	0.03	3555	1251	2304	0	0	0	1	0	1	1	0	1	1251	2304	0	MT-RNR1	rRNA	0	0	1	1
1445	3580	0	G	3578	C	2	0	2	0.06	0	0	0	2	0	2	3578	1258	2320	0	0	0	1258	2320	0	MT-RNR1	rRNA	0	0	1	1
1446	3531	0	A	3527	T	2	0	2	0.06	3527	1255	2272	0	0	0	2	0	2	2	0	2	1255	2272	0	MT-RNR1	rRNA	0	0	1	1
1447	3530	0	G	3525	T	2	0	2	0.06	1	0	1	2	1	1	3525	1274	2251	2	0	2	1274	2251	0	MT-RNR1	rRNA	0	0	1	1
1448	3251	0	T	3245	A	4	1	3	0.12	4	1	3	2	0	2	0	0	0	3245	1098	2147	1098	2147	0	MT-RNR1	rRNA	0	0	1	1
1449	3453	0	G	3451	T	2	1	1	0.06	0	0	0	0	0	0	3451	1292	2159	2	1	1	1292	2159	0	MT-RNR1	rRNA	0	0	1	1
1450	3572	0	C	3572	A	0	0	0	0	0	0	0	3572	1408	2164	0	0	0	0	0	0	1408	2164	0	MT-RNR1	rRNA	0	0	1	1
1451	3574	0	T	3572	G	2	0	2	0.06	0	0	0	0	0	0	2	0	2	3572	1397	2175	1397	2175	0	MT-RNR1	rRNA	0	0	1	1
1452	3432	0	T	3431	C	1	0	1	0.03	0	0	0	1	0	1	0	0	0	3431	1257	2174	1257	2174	0	MT-RNR1	rRNA	0	0	1	1
1453	3429	0	A	3427	T	1	0	1	0.03	3427	1249	2178	1	1	0	0	0	0	1	0	1	1249	2178	0	MT-RNR1	rRNA	0	0	1	1
1454	3427	0	G	3427	A	0	0	0	0	0	0	0	0	0	0	3427	1252	2175	0	0	0	1252	2175	0	MT-RNR1	rRNA	0	0	1	1
1455	3329	0	T	3329	A	0	0	0	0	0	0	0	0	0	0	0	0	0	3329	1157	2172	1157	2172	0	MT-RNR1	rRNA	0	0	1	1
1456	3275	0	T	3275	A	0	0	0	0	0	0	0	0	0	0	0	0	0	3275	1108	2167	1108	2167	0	MT-RNR1	rRNA	0	0	1	1
1457	3275	0	G	3275	A	0	0	0	0	0	0	0	0	0	0	3275	1102	2173	0	0	0	1102	2173	0	MT-RNR1	rRNA	0	0	1	1
1458	3202	0	A	3202	T	0	0	0	0	3202	1031	2171	0	0	0	0	0	0	0	0	0	1031	2171	0	MT-RNR1	rRNA	0	0	1	1
1459	3173	0	A	3169	G	2	1	1	0.06	3169	1013	2156	1	1	0	2	1	1	1	1	0	1013	2156	0	MT-RNR1	rRNA	0	0	1	1
1460	3198	0	C	3192	A	3	0	3	0.09	3	0	3	3192	991	2201	1	0	1	2	2	0	991	2201	0	MT-RNR1	rRNA	0	0	1	1
1461	3060	0	A	3049	G	8	0	8	0.26	3049	986	2063	2	0	2	8	0	8	1	0	1	986	2063	0	MT-RNR1	rRNA	0	0	1	1
1462	3051	0	G	3039	A	9	0	9	0.29	9	0	9	2	0	2	3039	986	2053	1	0	1	986	2053	0	MT-RNR1	rRNA	0	0	1	1
1463	3105	0	G	3092	A	9	2	7	0.29	9	2	7	2	0	2	3092	967	2125	2	0	2	967	2125	0	MT-RNR1	rRNA	0	0	1	1
1464	3081	0	G	3054	A	21	2	19	0.68	21	2	19	3	0	3	3054	953	2101	3	2	1	953	2101	0	MT-RNR1	rRNA	0	0	1	1
1465	3013	0	C	2993	A	10	1	9	0.33	10	1	9	2993	966	2027	5	0	5	5	1	4	966	2027	0	MT-RNR1	rRNA	0	0	1	1
1466	2894	0	C	2881	G	9	2	7	0.31	3	3	0	2881	983	1898	9	2	7	1	0	1	983	1898	0	MT-RNR1	rRNA	0	0	1	1
1467	2994	0	C	2976	G	12	2	10	0.4	5	2	3	2976	939	2037	12	2	10	1	0	1	939	2037	0	MT-RNR1	rRNA	0	0	1	1
1468	2961	0	T	2931	G	18	1	17	0.61	10	2	8	2	0	2	18	1	17	2931	936	1995	936	1995	0	MT-RNR1	rRNA	0	0	1	1
1469	2912	0	G	2907	A	2	0	2	0.07	2	0	2	2	0	2	2907	927	1980	1	1	0	927	1980	0	MT-RNR1	rRNA	0	0	1	1
1470	2937	0	A	2932	T	4	0	4	0.14	2932	916	2016	0	0	0	1	0	1	4	0	4	916	2016	0	MT-RNR1	rRNA	0	0	1	1
1471	2979	0	A	2974	C	3	0	3	0.1	2974	926	2048	3	0	3	0	0	0	2	1	1	926	2048	0	MT-RNR1	rRNA	0	0	1	1
1472	3002	0	G	2995	T	4	1	3	0.13	1	0	1	2	1	1	2995	919	2076	4	1	3	919	2076	0	MT-RNR1	rRNA	0	0	1	1
1473	3038	0	C	3036	T	2	0	2	0.07	0	0	0	3036	967	2069	0	0	0	2	0	2	967	2069	0	MT-RNR1	rRNA	0	0	1	1
1474	3022	0	G	3022	A	0	0	0	0	0	0	0	0	0	0	3022	979	2043	0	0	0	979	2043	0	MT-RNR1	rRNA	0	0	1	1
1475	3069	0	C	3066	A	1	0	1	0.03	1	0	1	3066	980	2086	1	0	1	1	1	0	980	2086	0	MT-RNR1	rRNA	0	0	1	1
1476	3041	0	G	3028	A	9	1	8	0.3	9	1	8	1	0	1	3028	984	2044	3	0	3	984	2044	0	MT-RNR1	rRNA	0	0	1	1
1477	2728	0	T	2703	A	10	0	10	0.37	10	0	10	10	0	10	5	0	5	2703	953	1750	953	1750	8	MT-RNR1	rRNA	1	0	1	1
1478	2595	0	A	2585	G	8	1	7	0.31	2585	930	1655	1	0	1	8	1	7	1	0	1	930	1655	9	MT-RNR1	rRNA	1	0	1	1
1479	2641	0	C	2640	T	1	1	0	0.04	0	0	0	2640	936	1704	0	0	0	1	1	0	936	1704	10	MT-RNR1	rRNA	1	0	1	1
1480	2340	0	A	2338	T	1	0	1	0.04	2338	923	1415	1	0	1	0	0	0	1	0	1	923	1415	11	MT-RNR1	rRNA	1	0	1	1
1481	2592	0	C	2590	T	2	0	2	0.08	0	0	0	2590	935	1655	0	0	0	2	0	2	935	1655	12	MT-RNR1	rRNA	1	0	1	1
1482	2376	0	A	2372	G	2	1	1	0.08	2372	934	1438	1	0	1	2	1	1	1	0	1	934	1438	13	MT-RNR1	rRNA	1	0	1	1
1483	2671	0	C	2669	T	2	0	2	0.07	0	0	0	2669	949	1720	0	0	0	2	0	2	949	1720	14	MT-RNR1	rRNA	1	0	1	1
1484	2657	0	C	2652	G	3	0	3	0.11	2	0	2	2652	951	1701	3	0	3	0	0	0	951	1701	7	MT-RNR1	rRNA	1	0	1	1
1485	2502	0	G	2500	A	2	0	2	0.08	2	0	2	0	0	0	2500	831	1669	0	0	0	831	1669	0	MT-RNR1	rRNA	0	0	1	1
1486	2511	0	C	2503	G	5	0	5	0.2	2	0	2	2503	819	1684	5	0	5	1	0	1	819	1684	0	MT-RNR1	rRNA	0	0	1	1
1487	2414	0	C	2410	T	3	1	2	0.12	0	0	0	2410	823	1587	1	0	1	3	1	2	823	1587	0	MT-RNR1	rRNA	0	0	1	1
1488	2378	0	C	2378	A	0	0	0	0	0	0	0	2378	818	1560	0	0	0	0	0	0	818	1560	0	MT-RNR1	rRNA	0	0	1	1
1489	2322	0	G	2316	A	5	0	5	0.22	5	0	5	1	0	1	2316	805	1511	0	0	0	805	1511	0	MT-RNR1	rRNA	0	0	1	1
1490	2047	0	T	2038	G	4	0	4	0.2	3	0	3	2	0	2	4	0	4	2038	778	1260	778	1260	0	MT-RNR1	rRNA	0	0	1	1
1491	2032	0	C	2032	A	0	0	0	0	0	0	0	2032	788	1244	0	0	0	0	0	0	788	1244	0	MT-RNR1	rRNA	0	0	1	1
1492	1784	0	A	1778	G	5	0	5	0.28	1778	781	997	0	0	0	5	0	5	1	0	1	781	997	0	MT-RNR1	rRNA	0	0	1	1
1493	1979	0	C	1975	G	2	1	1	0.1	1	1	0	1975	798	1177	2	1	1	1	0	1	798	1177	0	MT-RNR1	rRNA	0	0	1	1
1494	1865	0	C	1863	A	1	0	1	0.05	1	0	1	1863	778	1085	1	1	0	0	0	0	778	1085	0	MT-RNR1	rRNA	0	0	1	1
1495	1859	0	C	1857	A	1	1	0	0.05	1	1	0	1857	771	1086	1	0	1	0	0	0	771	1086	0	MT-RNR1	rRNA	0	0	1	1
1496	1827	0	T	1808	A	10	1	9	0.55	10	1	9	0	0	0	9	0	9	1808	761	1047	761	1047	0	MT-RNR1	rRNA	0	0	1	1
1497	1842	0	C	1840	T	1	1	0	0.05	0	0	0	1840	774	1066	1	1	0	1	1	0	774	1066	0	MT-RNR1	rRNA	0	0	1	1
1498	1906	0	C	1902	G	3	1	2	0.16	1	1	0	1902	818	1084	3	1	2	0	0	0	818	1084	0	MT-RNR1	rRNA	0	0	1	1
1499	1855	0	T	1838	A	10	0	10	0.54	10	0	10	2	1	1	5	0	5	1838	776	1062	776	1062	0	MT-RNR1	rRNA	0	0	1	1
1500	1804	0	C	1802	T	2	2	0	0.11	0	0	0	1802	742	1060	0	0	0	2	2	0	742	1060	0	MT-RNR1	rRNA	0	0	1	1
1501	1776	0	A	1774	G	2	0	2	0.11	1774	711	1063	0	0	0	2	0	2	0	0	0	711	1063	0	MT-RNR1	rRNA	0	0	1	1
1502	1804	0	A	1804	T	0	0	0	0	1804	705	1099	0	0	0	0	0	0	0	0	0	705	1099	0	MT-RNR1	rRNA	0	0	1	1
1503	1824	0	G	1823	A	1	1	0	0.05	1	1	0	0	0	0	1823	706	1117	0	0	0	706	1117	0	MT-RNR1	rRNA	0	0	1	1
1504	1759	0	T	1759	A	0	0	0	0	0	0	0	0	0	0	0	0	0	1759	681	1078	681	1078	0	MT-RNR1	rRNA	0	0	1	1
1505	1744	0	A	1743	T	1	0	1	0.06	1743	669	1074	0	0	0	0	0	0	1	0	1	669	1074	0	MT-RNR1	rRNA	0	0	1	1
1506	1745	0	T	1743	C	1	0	1	0.06	0	0	0	1	0	1	1	0	1	1743	668	1075	668	1075	0	MT-RNR1	rRNA	0	0	1	1
1507	1740	0	A	1739	G	1	1	0	0.06	1739	667	1072	0	0	0	1	1	0	0	0	0	667	1072	0	MT-RNR1	rRNA	0	0	1	1
1508	1777	0	C	1775	T	2	0	2	0.11	0	0	0	1775	686	1089	0	0	0	2	0	2	686	1089	0	MT-RNR1	rRNA	0	0	1	1
1509	1783	0	T	1782	C	1	0	1	0.06	0	0	0	1	0	1	0	0	0	1782	691	1091	691	1091	0	MT-RNR1	rRNA	0	0	1	1
1510	1779	0	T	1779	A	0	0	0	0	0	0	0	0	0	0	0	0	0	1779	693	1086	693	1086	0	MT-RNR1	rRNA	0	0	1	1
1511	1794	0	C	1794	A	0	0	0	0	0	0	0	1794	698	1096	0	0	0	0	0	0	698	1096	0	MT-RNR1	rRNA	0	0	1	1
1512	1802	0	A	1802	T	0	0	0	0	1802	700	1102	0	0	0	0	0	0	0	0	0	700	1102	0	MT-RNR1	rRNA	0	0	1	1
1513	1799	0	A	1799	T	0	0	0	0	1799	698	1101	0	0	0	0	0	0	0	0	0	698	1101	0	MT-RNR1	rRNA	0	0	1	1
1514	1810	0	A	1808	G	2	1	1	0.11	1808	704	1104	0	0	0	2	1	1	0	0	0	704	1104	0	MT-RNR1	rRNA	0	0	1	1
1515	1823	0	G	1823	A	0	0	0	0	0	0	0	0	0	0	1823	717	1106	0	0	0	717	1106	0	MT-RNR1	rRNA	0	0	1	1
1516	1823	0	G	1823	A	0	0	0	0	0	0	0	0	0	0	1823	717	1106	0	0	0	717	1106	0	MT-RNR1	rRNA	0	0	1	1
1517	1812	0	A	1812	T	0	0	0	0	1812	713	1099	0	0	0	0	0	0	0	0	0	713	1099	0	MT-RNR1	rRNA	0	0	1	1
1518	1828	0	C	1828	A	0	0	0	0	0	0	0	1828	720	1108	0	0	0	0	0	0	720	1108	0	MT-RNR1	rRNA	0	0	1	1
1519	1837	0	A	1837	T	0	0	0	0	1837	722	1115	0	0	0	0	0	0	0	0	0	722	1115	0	MT-RNR1	rRNA	0	0	1	1
1520	1859	0	T	1858	A	1	0	1	0.05	1	0	1	0	0	0	0	0	0	1858	745	1113	745	1113	0	MT-RNR1	rRNA	0	0	1	1
1521	1853	0	T	1853	A	0	0	0	0	0	0	0	0	0	0	0	0	0	1853	738	1115	738	1115	0	MT-RNR1	rRNA	0	0	1	1
1522	1858	0	T	1858	A	0	0	0	0	0	0	0	0	0	0	0	0	0	1858	741	1117	741	1117	0	MT-RNR1	rRNA	0	0	1	1
1523	1874	0	A	1871	T	1	0	1	0.05	1871	743	1128	1	0	1	1	1	0	1	0	1	743	1128	0	MT-RNR1	rRNA	0	0	1	1
1524	1895	0	A	1894	T	1	0	1	0.05	1894	740	1154	0	0	0	0	0	0	1	0	1	740	1154	0	MT-RNR1	rRNA	0	0	1	1
1525	1938	0	C	1937	T	1	1	0	0.05	0	0	0	1937	750	1187	0	0	0	1	1	0	750	1187	0	MT-RNR1	rRNA	0	0	1	1
1526	1935	0	T	1935	A	0	0	0	0	0	0	0	0	0	0	0	0	0	1935	751	1184	751	1184	2	MT-RNR1	rRNA	1	0	1	1
1527	1959	0	A	1959	T	0	0	0	0	1959	757	1202	0	0	0	0	0	0	0	0	0	757	1202	6	MT-RNR1	rRNA	1	0	1	1
1528	1961	0	A	1961	T	0	0	0	0	1961	757	1204	0	0	0	0	0	0	0	0	0	757	1204	5	MT-RNR1	rRNA	1	0	1	1
1529	1944	0	A	1942	C	1	1	0	0.05	1942	752	1190	1	1	0	1	1	0	0	0	0	752	1190	4	MT-RNR1	rRNA	1	0	1	1
1530	1758	0	A	1758	T	0	0	0	0	1758	750	1008	0	0	0	0	0	0	0	0	0	750	1008	3	MT-RNR1	rRNA	1	0	1	1
1531	1963	0	C	1963	A	0	0	0	0	0	0	0	1963	749	1214	0	0	0	0	0	0	749	1214	1	MT-RNR1	rRNA	1	0	1	1
1532	1970	0	C	1969	A	1	1	0	0.05	1	1	0	1969	750	1219	0	0	0	0	0	0	750	1219	5	MT-RNR1	rRNA	1	0	1	1
1533	1968	0	C	1968	A	0	0	0	0	0	0	0	1968	750	1218	0	0	0	0	0	0	750	1218	4	MT-RNR1	rRNA	1	0	1	1
1534	1966	0	C	1965	A	1	0	1	0.05	1	0	1	1965	749	1216	0	0	0	0	0	0	749	1216	3	MT-RNR1	rRNA	1	0	1	1
1535	1963	0	T	1962	C	1	0	1	0.05	0	0	0	1	0	1	0	0	0	1962	757	1205	757	1205	1	MT-RNR1	rRNA	1	0	1	1
1536	1955	0	A	1955	T	0	0	0	0	1955	758	1197	0	0	0	0	0	0	0	0	0	758	1197	0	MT-RNR1	rRNA	0	0	1	1
1537	1954	0	C	1953	G	1	0	1	0.05	0	0	0	1953	740	1213	1	0	1	0	0	0	740	1213	0	MT-RNR1	rRNA	0	0	1	1
1538	1937	0	G	1937	A	0	0	0	0	0	0	0	0	0	0	1937	732	1205	0	0	0	732	1205	0	MT-RNR1	rRNA	0	0	1	1
1539	1937	0	C	1936	A	1	1	0	0.05	1	1	0	1936	738	1198	0	0	0	0	0	0	738	1198	0	MT-RNR1	rRNA	0	0	1	1
1540	1940	0	A	1935	G	5	2	3	0.26	1935	741	1194	0	0	0	5	2	3	0	0	0	741	1194	0	MT-RNR1	rRNA	0	0	1	1
1541	1948	0	T	1947	A	1	1	0	0.05	1	1	0	0	0	0	0	0	0	1947	754	1193	754	1193	0	MT-RNR1	rRNA	0	0	1	1
1542	1949	0	T	1948	A	1	0	1	0.05	1	0	1	0	0	0	0	0	0	1948	744	1204	744	1204	8	MT-RNR1	rRNA	1	0	1	1
1543	1960	0	T	1958	C	2	1	1	0.1	0	0	0	2	1	1	0	0	0	1958	738	1220	738	1220	9	MT-RNR1	rRNA	1	0	1	1
1544	1947	0	A	1945	T	1	0	1	0.05	1945	726	1219	0	0	0	1	0	1	1	0	1	726	1219	10	MT-RNR1	rRNA	1	0	1	1
1545	1929	0	T	1928	A	1	0	1	0.05	1	0	1	0	0	0	0	0	0	1928	717	1211	717	1211	11	MT-RNR1	rRNA	1	0	1	1
1546	1931	0	A	1930	G	1	1	0	0.05	1930	714	1216	0	0	0	1	1	0	0	0	0	714	1216	12	MT-RNR1	rRNA	1	0	1	1
1547	1887	0	T	1886	A	1	1	0	0.05	1	1	0	0	0	0	0	0	0	1886	698	1188	698	1188	13	MT-RNR1	rRNA	1	0	1	1
1548	1875	0	A	1874	G	1	1	0	0.05	1874	699	1175	0	0	0	1	1	0	0	0	0	699	1175	14	MT-RNR1	rRNA	1	0	1	1
1549	1812	0	G	1808	A	3	3	0	0.17	3	3	0	0	0	0	1808	643	1165	1	0	1	643	1165	7	MT-RNR1	rRNA	1	0	1	1
1550	1703	0	A	1702	T	1	0	1	0.06	1702	551	1151	0	0	0	0	0	0	1	0	1	551	1151	0	MT-RNR1	rRNA	0	0	1	1
1551	1688	0	G	1688	A	0	0	0	0	0	0	0	0	0	0	1688	552	1136	0	0	0	552	1136	0	MT-RNR1	rRNA	0	0	1	1
1552	1693	0	G	1692	T	1	0	1	0.06	0	0	0	0	0	0	1692	563	1129	1	0	1	563	1129	0	MT-RNR1	rRNA	0	0	1	1
1553	1698	0	A	1698	T	0	0	0	0	1698	567	1131	0	0	0	0	0	0	0	0	0	567	1131	0	MT-RNR1	rRNA	0	0	1	1
1554	1721	0	G	1720	T	1	0	1	0.06	0	0	0	0	0	0	1720	591	1129	1	0	1	591	1129	0	MT-RNR1	rRNA	0	0	1	1
1555	1719	0	A	1718	G	1	0	1	0.06	1718	591	1127	0	0	0	1	0	1	0	0	0	591	1127	0	MT-RNR1	rRNA	0	0	1	1
1556	1732	0	C	1730	G	2	2	0	0.12	0	0	0	1730	599	1131	2	2	0	0	0	0	599	1131	0	MT-RNR1	rRNA	0	0	1	1
1557	1727	0	A	1719	G	8	1	7	0.46	1719	595	1124	0	0	0	8	1	7	0	0	0	595	1124	0	MT-RNR1	rRNA	0	0	1	1
1558	1723	0	A	1723	T	0	0	0	0	1723	598	1125	0	0	0	0	0	0	0	0	0	598	1125	0	MT-RNR1	rRNA	0	0	1	1
1559	1755	0	G	1755	A	0	0	0	0	0	0	0	0	0	0	1755	629	1126	0	0	0	629	1126	0	MT-RNR1	rRNA	0	0	1	1
1560	1687	0	T	1687	A	0	0	0	0	0	0	0	0	0	0	0	0	0	1687	613	1074	613	1074	0	MT-RNR1	rRNA	0	0	1	1
1561	1709	0	C	1707	T	2	2	0	0.12	0	0	0	1707	626	1081	0	0	0	2	2	0	626	1081	0	MT-RNR1	rRNA	0	0	1	1
1562	1696	0	G	1694	A	2	1	1	0.12	2	1	1	0	0	0	1694	620	1074	0	0	0	620	1074	0	MT-RNR1	rRNA	0	0	1	1
1563	1653	0	T	1645	C	5	0	5	0.3	1	0	1	5	0	5	2	2	0	1645	604	1041	604	1041	0	MT-RNR1	rRNA	0	0	1	1
1564	1621	0	A	1617	T	2	0	2	0.12	1617	614	1003	0	0	0	2	0	2	2	0	2	614	1003	0	MT-RNR1	rRNA	0	0	1	1
1565	1546	0	A	1544	G	2	2	0	0.13	1544	596	948	0	0	0	2	2	0	0	0	0	596	948	0	MT-RNR1	rRNA	0	0	1	1
1566	1444	0	C	1435	G	8	6	2	0.55	1	1	0	1435	562	873	8	6	2	0	0	0	562	873	0	MT-RNR1	rRNA	0	0	1	1
1567	1262	2	A	1260	T	1	1	0	0.08	1260	550	710	1	1	0	0	0	0	1	1	0	550	710	0	MT-RNR1	rRNA	0	0	1	1
1568	1256	0	T	1253	G	2	2	0	0.16	0	0	0	1	1	0	2	2	0	1253	543	710	543	710	0	MT-RNR1	rRNA	0	0	1	1
1569	1268	0	G	1263	C	4	4	0	0.32	1	1	0	4	4	0	1263	556	707	0	0	0	556	707	0	MT-RNR1	rRNA	0	0	1	1
1570	1227	0	G	1222	A	4	3	1	0.33	4	3	1	0	0	0	1222	558	664	1	1	0	558	664	0	MT-RNR1	rRNA	0	0	1	1
1571	1168	0	T	1118	A	24	2	22	2.05	24	2	22	11	0	11	15	6	9	1118	541	577	541	577	0	MT-RNR1	rRNA	0	0	1	1
1572	1136	0	A	1130	G	5	1	4	0.44	1130	544	586	0	0	0	5	1	4	1	0	1	544	586	0	MT-RNR1	rRNA	0	0	1	1
1573	1070	0	A	1069	T	1	1	0	0.09	1069	492	577	0	0	0	0	0	0	1	1	0	492	577	0	MT-RNR1	rRNA	0	0	1	1
1574	1077	0	G	1076	C	1	1	0	0.09	0	0	0	1	1	0	1076	500	576	0	0	0	500	576	0	MT-RNR1	rRNA	0	0	1	1
1575	1064	0	T	1061	A	1	1	0	0.09	1	1	0	1	0	1	1	0	1	1061	489	572	489	572	0	MT-RNR1	rRNA	0	0	1	1
1576	1066	0	G	1066	A	0	0	0	0	0	0	0	0	0	0	1066	493	573	0	0	0	493	573	0	MT-RNR1	rRNA	0	0	1	1
1577	1050	0	T	1045	C	4	1	3	0.38	0	0	0	4	1	3	1	0	1	1045	482	563	482	563	0	MT-RNR1	rRNA	0	0	1	1
1578	1052	0	A	1049	G	2	0	2	0.19	1049	490	559	0	0	0	2	0	2	1	1	0	490	559	0	MT-RNR1	rRNA	0	0	1	1
1579	1089	0	C	1089	A	0	0	0	0	0	0	0	1089	526	563	0	0	0	0	0	0	526	563	0	MT-RNR1	rRNA	0	0	1	1
1580	1084	0	T	1080	C	2	0	2	0.18	1	0	1	2	0	2	1	0	1	1080	545	535	545	535	0	MT-RNR1	rRNA	0	0	1	1
1581	1073	0	G	1072	A	1	1	0	0.09	1	1	0	0	0	0	1072	553	519	0	0	0	553	519	0	MT-RNR1	rRNA	0	0	1	1
1582	1077	0	G	1073	A	4	2	2	0.37	4	2	2	0	0	0	1073	549	524	0	0	0	549	524	0	MT-RNR1	rRNA	0	0	1	1
1583	1065	0	A	1042	G	18	2	16	1.69	1042	530	512	3	0	3	18	2	16	2	0	2	530	512	0	MT-RNR1	rRNA	0	0	1	1
1584	1049	0	A	1034	C	6	0	6	0.57	1034	526	508	6	0	6	6	0	6	3	1	2	526	508	0	MT-RNR1	rRNA	0	0	1	1
1585	1030	0	A	1028	T	1	1	0	0.1	1028	526	502	1	1	0	0	0	0	1	1	0	526	502	0	MT-RNR1	rRNA	0	0	1	1
1586	1035	0	G	1034	C	1	1	0	0.1	0	0	0	1	1	0	1034	533	501	0	0	0	533	501	0	MT-RNR1	rRNA	0	0	1	1
1587	1032	0	T	1029	G	2	1	1	0.19	0	0	0	1	1	0	2	1	1	1029	525	504	525	504	0	MT-RNR1	rRNA	0	0	1	1
1588	1038	0	G	1038	A	0	0	0	0	0	0	0	0	0	0	1038	533	505	0	0	0	533	505	0	MT-RNR1	rRNA	0	0	1	1
1589	1042	0	C	1042	A	0	0	0	0	0	0	0	1042	534	508	0	0	0	0	0	0	534	508	0	MT-RNR1	rRNA	0	0	1	1
1590	1050	0	A	1050	T	0	0	0	0	1050	531	519	0	0	0	0	0	0	0	0	0	531	519	0	MT-RNR1	rRNA	0	0	1	1
1591	1103	0	C	1103	A	0	0	0	0	0	0	0	1103	579	524	0	0	0	0	0	0	579	524	0	MT-RNR1	rRNA	0	0	1	1
1592	1102	0	T	1101	C	1	1	0	0.09	0	0	0	1	1	0	0	0	0	1101	580	521	580	521	0	MT-RNR1	rRNA	0	0	1	1
1593	1080	0	T	1080	A	0	0	0	0	0	0	0	0	0	0	0	0	0	1080	557	523	557	523	0	MT-RNR1	rRNA	0	0	1	1
1594	1112	0	G	1112	A	0	0	0	0	0	0	0	0	0	0	1112	555	557	0	0	0	555	557	0	MT-RNR1	rRNA	0	0	1	1
1595	1107	0	G	1107	A	0	0	0	0	0	0	0	0	0	0	1107	550	557	0	0	0	550	557	0	MT-RNR1	rRNA	0	0	1	1
1596	1100	0	A	1100	T	0	0	0	0	1100	548	552	0	0	0	0	0	0	0	0	0	548	552	0	MT-RNR1	rRNA	0	0	1	1
1597	1084	0	C	1081	A	1	1	0	0.09	1	1	0	1081	537	544	1	0	1	1	1	0	537	544	0	MT-RNR1	rRNA	0	0	1	1
1598	1017	0	G	1016	A	1	0	1	0.1	1	0	1	0	0	0	1016	493	523	0	0	0	493	523	0	MT-RNR1	rRNA	0	0	1	1
1599	1013	0	A	1012	G	1	0	1	0.1	1012	492	520	0	0	0	1	0	1	0	0	0	492	520	0	MT-RNR1	rRNA	0	0	1	1
1600	1009	0	A	1008	T	1	0	1	0.1	1008	485	523	0	0	0	0	0	0	1	0	1	485	523	0	MT-RNR1	rRNA	0	0	1	1
1601	1070	0	C	1068	A	1	0	1	0.09	1	0	1	1068	552	516	0	0	0	1	0	1	552	516	0	MT-RNR1	rRNA	0	0	1	1
1602	1053	0	C	1037	A	11	1	10	1.04	11	1	10	1037	573	464	4	1	3	1	1	0	573	464	0	MT-TV	tRNA	0	0	1	1
1603	1033	0	A	1032	T	1	1	0	0.1	1032	576	456	0	0	0	0	0	0	1	1	0	576	456	0	MT-TV	tRNA	0	0	1	1
1604	1037	0	G	1037	A	0	0	0	0	0	0	0	0	0	0	1037	574	463	0	0	0	574	463	0	MT-TV	tRNA	0	0	1	1
1605	1030	0	A	1030	T	0	0	0	0	1030	573	457	0	0	0	0	0	0	0	0	0	573	457	0	MT-TV	tRNA	0	0	1	1
1606	1034	0	G	1032	A	1	0	1	0.1	1	0	1	0	0	0	1032	578	454	1	1	0	578	454	0	MT-TV	tRNA	0	0	1	1
1607	992	0	T	991	C	1	1	0	0.1	0	0	0	1	1	0	0	0	0	991	543	448	543	448	0	MT-TV	tRNA	0	1	1	1
1608	1025	0	G	1025	A	0	0	0	0	0	0	0	0	0	0	1025	575	450	0	0	0	575	450	0	MT-TV	tRNA	0	0	1	1
1609	1017	0	T	1017	A	0	0	0	0	0	0	0	0	0	0	0	0	0	1017	560	457	560	457	0	MT-TV	tRNA	0	0	1	1
1610	1084	0	A	1077	T	4	2	2	0.37	1077	564	513	1	1	0	2	1	1	4	2	2	564	513	0	MT-TV	tRNA	0	0	1	1
1611	1153	1	G	1152	C	1	0	1	0.09	0	0	0	1	0	1	1152	630	522	0	0	0	630	522	0	MT-TV	tRNA	0	0	1	1
1612	1207	0	C	1204	T	3	1	2	0.25	0	0	0	1204	679	525	0	0	0	3	1	2	679	525	0	MT-TV	tRNA	0	0	1	1
1613	1267	0	T	1266	G	1	0	1	0.08	0	0	0	0	0	0	1	0	1	1266	742	524	742	524	0	MT-TV	tRNA	0	0	1	1
1614	1272	0	T	1272	A	0	0	0	0	0	0	0	0	0	0	0	0	0	1272	743	529	743	529	0	MT-TV	tRNA	0	0	1	1
1615	1276	0	A	1276	T	0	0	0	0	1276	738	538	0	0	0	0	0	0	0	0	0	738	538	0	MT-TV	tRNA	0	0	1	1
1616	1283	0	A	1283	T	0	0	0	0	1283	744	539	0	0	0	0	0	0	0	0	0	744	539	0	MT-TV	tRNA	0	0	1	1
1617	1340	0	C	1340	A	0	0	0	0	0	0	0	1340	797	543	0	0	0	0	0	0	797	543	0	MT-TV	tRNA	0	0	1	1
1618	1344	0	A	1343	C	1	0	1	0.07	1343	800	543	1	0	1	0	0	0	0	0	0	800	543	0	MT-TV	tRNA	0	0	1	1
1619	1357	0	C	1356	T	1	0	1	0.07	0	0	0	1356	807	549	0	0	0	1	0	1	807	549	0	MT-TV	tRNA	0	0	1	1
1620	1409	0	A	1408	G	1	0	1	0.07	1408	840	568	0	0	0	1	0	1	0	0	0	840	568	0	MT-TV	tRNA	0	0	1	1
1621	1434	0	A	1433	C	1	0	1	0.07	1433	852	581	1	0	1	0	0	0	0	0	0	852	581	0	MT-TV	tRNA	0	0	1	1
1622	1446	0	A	1445	C	1	0	1	0.07	1445	859	586	1	0	1	0	0	0	0	0	0	859	586	0	MT-TV	tRNA	0	0	1	1
1623	1422	0	G	1421	A	1	0	1	0.07	1	0	1	0	0	0	1421	857	564	0	0	0	857	564	0	MT-TV	tRNA	0	0	1	1
1624	1408	0	C	1406	A	1	1	0	0.07	1	1	0	1406	860	546	0	0	0	1	0	1	860	546	0	MT-TV	tRNA	0	0	1	1
1625	1381	0	A	1379	T	1	0	1	0.07	1379	861	518	1	0	1	0	0	0	1	0	1	861	518	0	MT-TV	tRNA	0	0	1	1
1626	1461	0	C	1460	T	1	0	1	0.07	0	0	0	1460	891	569	0	0	0	1	0	1	891	569	0	MT-TV	tRNA	0	0	1	1
1627	1500	0	C	1499	A	1	0	1	0.07	1	0	1	1499	942	557	0	0	0	0	0	0	942	557	0	MT-TV	tRNA	0	0	1	1
1628	1509	0	C	1507	T	1	0	1	0.07	0	0	0	1507	956	551	1	0	1	1	0	1	956	551	0	MT-TV	tRNA	0	0	1	1
1629	1513	0	A	1511	C	1	0	1	0.07	1511	960	551	1	0	1	1	0	1	0	0	0	960	551	0	MT-TV	tRNA	0	0	1	1
1630	1517	2	A	1514	T	2	0	2	0.13	1514	960	554	0	0	0	1	0	1	2	0	2	960	554	0	MT-TV	tRNA	0	0	1	1
1631	1630	0	C	1630	A	0	0	0	0	0	0	0	1630	1069	561	0	0	0	0	0	0	1069	561	0	MT-TV	tRNA	0	0	1	1
1632	1647	0	T	1646	A	1	0	1	0.06	1	0	1	0	0	0	0	0	0	1646	1094	552	1094	552	0	MT-TV	tRNA	0	0	1	1
1633	1656	0	T	1656	A	0	0	0	0	0	0	0	0	0	0	0	0	0	1656	1096	560	1096	560	0	MT-TV	tRNA	0	0	1	1
1634	1656	0	A	1655	G	1	1	0	0.06	1655	1097	558	0	0	0	1	1	0	0	0	0	1097	558	0	MT-TV	tRNA	0	0	1	1
1635	1669	0	C	1669	A	0	0	0	0	0	0	0	1669	1099	570	0	0	0	0	0	0	1099	570	0	MT-TV	tRNA	0	0	1	1
1636	1670	0	A	1670	T	0	0	0	0	1670	1099	571	0	0	0	0	0	0	0	0	0	1099	571	0	MT-TV	tRNA	0	0	1	1
1637	1686	0	C	1686	A	0	0	0	0	0	0	0	1686	1098	588	0	0	0	0	0	0	1098	588	0	MT-TV	tRNA	0	0	1	1
1638	1684	0	T	1684	A	0	0	0	0	0	0	0	0	0	0	0	0	0	1684	1096	588	1096	588	0	MT-TV	tRNA	0	0	1	1
1639	1693	0	T	1690	C	3	0	3	0.18	0	0	0	3	0	3	0	0	0	1690	1090	600	1090	600	0	MT-TV	tRNA	0	0	1	1
1640	1690	0	A	1689	C	1	0	1	0.06	1689	1086	603	1	0	1	0	0	0	0	0	0	1086	603	0	MT-TV	tRNA	0	0	1	1
1641	1735	0	G	1732	A	1	0	1	0.06	1	0	1	1	0	1	1732	1131	601	1	1	0	1131	601	0	MT-TV	tRNA	0	0	1	1
1642	1735	0	G	1734	C	1	1	0	0.06	0	0	0	1	1	0	1734	1142	592	0	0	0	1142	592	0	MT-TV	tRNA	0	0	1	1
1643	1785	0	A	1784	G	1	0	1	0.06	1784	1139	645	0	0	0	1	0	1	0	0	0	1139	645	0	MT-TV	tRNA	0	0	1	1
1644	1786	1	G	1784	A	1	0	1	0.06	1	0	1	1	0	1	1784	1141	643	0	0	0	1141	643	0	MT-TV	tRNA	0	0	1	1
1645	1772	0	A	1769	T	2	0	2	0.11	1769	1144	625	0	0	0	1	1	0	2	0	2	1144	625	0	MT-TV	tRNA	0	0	1	1
1646	1850	0	T	1848	A	1	0	1	0.05	1	0	1	1	0	1	0	0	0	1848	1221	627	1221	627	0	MT-TV	tRNA	0	0	1	1
1647	1878	0	T	1876	C	1	1	0	0.05	0	0	0	1	1	0	1	0	1	1876	1247	629	1247	629	0	MT-TV	tRNA	0	0	1	1
1648	1898	0	T	1895	C	2	2	0	0.11	0	0	0	2	2	0	1	1	0	1895	1245	650	1245	650	0	MT-TV	tRNA	0	0	1	1
1649	1901	0	C	1900	G	1	1	0	0.05	0	0	0	1900	1242	658	1	1	0	0	0	0	1242	658	0	MT-TV	tRNA	0	0	1	1
1650	1904	0	A	1903	G	1	1	0	0.05	1903	1242	661	0	0	0	1	1	0	0	0	0	1242	661	0	MT-TV	tRNA	0	0	1	1
1651	1971	0	A	1969	T	2	0	2	0.1	1969	1237	732	0	0	0	0	0	0	2	0	2	1237	732	0	MT-TV	tRNA	0	0	1	1
1652	2041	0	C	2040	T	1	1	0	0.05	0	0	0	2040	1302	738	0	0	0	1	1	0	1302	738	0	MT-TV	tRNA	0	0	1	1
1653	2060	0	T	2058	C	1	0	1	0.05	0	0	0	1	0	1	1	1	0	2058	1303	755	1303	755	0	MT-TV	tRNA	0	0	1	1
1654	2038	0	T	2037	A	1	0	1	0.05	1	0	1	0	0	0	0	0	0	2037	1281	756	1281	756	0	MT-TV	tRNA	0	0	1	1
1655	2039	0	A	2038	G	1	0	1	0.05	2038	1280	758	0	0	0	1	0	1	0	0	0	1280	758	0	MT-TV	tRNA	0	0	1	1
1656	2025	0	A	2025	T	0	0	0	0	2025	1276	749	0	0	0	0	0	0	0	0	0	1276	749	0	MT-TV	tRNA	0	0	1	1
1657	2042	0	C	2042	A	0	0	0	0	0	0	0	2042	1284	758	0	0	0	0	0	0	1284	758	0	MT-TV	tRNA	0	0	1	1
1658	2028	0	T	2027	A	1	0	1	0.05	1	0	1	0	0	0	0	0	0	2027	1283	744	1283	744	0	MT-TV	tRNA	0	0	1	1
1659	1993	0	T	1992	G	1	0	1	0.05	0	0	0	0	0	0	1	0	1	1992	1250	742	1250	742	0	MT-TV	tRNA	0	0	1	1
1660	1994	0	G	1992	A	1	0	1	0.05	1	0	1	1	0	1	1992	1242	750	0	0	0	1242	750	0	MT-TV	tRNA	0	0	1	1
1661	1979	0	A	1977	T	1	0	1	0.05	1977	1242	735	0	0	0	1	1	0	1	0	1	1242	735	0	MT-TV	tRNA	0	0	1	1
1662	2002	0	C	2001	T	1	1	0	0.05	0	0	0	2001	1241	760	0	0	0	1	1	0	1241	760	0	MT-TV	tRNA	0	0	1	1
1663	1963	0	C	1961	T	2	1	1	0.1	0	0	0	1961	1230	731	0	0	0	2	1	1	1230	731	0	MT-TV	tRNA	0	0	1	1
1664	1968	2	G	1967	A	1	1	0	0.05	1	1	0	0	0	0	1967	1235	732	0	0	0	1235	732	0	MT-TV	tRNA	0	0	1	1
1665	1997	0	C	1991	G	4	1	3	0.2	1	0	1	1991	1263	728	4	1	3	1	0	1	1263	728	0	MT-TV	tRNA	0	0	1	1
1666	1993	0	T	1987	A	2	1	1	0.1	2	1	1	2	0	2	2	0	2	1987	1268	719	1268	719	0	MT-TV	tRNA	0	0	1	1
1667	2035	1	C	2028	T	5	2	3	0.25	2	0	2	2028	1302	726	0	0	0	5	2	3	1302	726	0	MT-TV	tRNA	0	0	1	1
1668	2077	0	T	2063	C	6	1	5	0.29	4	1	3	6	1	5	4	0	4	2063	1293	770	1293	770	0	MT-TV	tRNA	0	0	1	1
1669	2231	0	G	2176	C	25	1	24	1.12	18	0	18	25	1	24	2176	1277	899	12	0	12	1277	899	0	MT-TV	tRNA	0	0	1	1
1670	2292	0	A	2237	T	22	0	22	0.96	2237	1275	962	16	0	16	17	0	17	22	0	22	1275	962	0	MT-TV	tRNA	0	0	1	1
1671	2435	1	G	2375	C	26	0	26	1.07	14	0	14	26	0	26	2375	1329	1046	20	0	20	1329	1046	0	MT-RNR2	rRNA	0	0	1	1
1672	2450	1	C	2415	A	18	0	18	0.73	18	0	18	2415	1336	1079	6	0	6	11	1	10	1336	1079	0	MT-RNR2	rRNA	0	0	1	1
1673	2439	5	T	2403	A	19	0	19	0.78	19	0	19	10	1	9	7	0	7	2403	1341	1062	1341	1062	0	MT-RNR2	rRNA	0	0	1	1
1674	2439	6	A	2413	G	11	1	10	0.45	2413	1330	1083	9	0	9	11	1	10	6	0	6	1330	1083	0	MT-RNR2	rRNA	0	0	1	1
1675	2445	2	A	2413	G	15	0	15	0.61	2413	1335	1078	12	0	12	15	0	15	5	0	5	1335	1078	0	MT-RNR2	rRNA	0	0	1	1
1676	2406	8	A	2383	T	13	0	13	0.54	2383	1330	1053	5	0	5	5	0	5	13	0	13	1330	1053	0	MT-RNR2	rRNA	0	0	1	1
1677	2518	3	C	2503	A	10	1	9	0.4	10	1	9	2503	1366	1137	1	1	0	4	0	4	1366	1137	0	MT-RNR2	rRNA	0	0	1	1
1678	2549	4	C	2535	G	6	2	4	0.24	4	0	4	2535	1393	1142	6	2	4	4	0	4	1393	1142	0	MT-RNR2	rRNA	0	0	1	1
1679	2548	4	T	2510	G	14	0	14	0.55	12	1	11	12	6	6	14	0	14	2510	1384	1126	1384	1126	0	MT-RNR2	rRNA	0	0	1	1
1680	2550	5	A	2521	T	13	1	12	0.51	2521	1384	1137	9	3	6	7	1	6	13	1	12	1384	1137	0	MT-RNR2	rRNA	0	0	1	1
1681	2621	2	G	2578	C	23	4	19	0.88	9	0	9	23	4	19	2578	1445	1133	11	0	11	1445	1133	2	MT-RNR2	rRNA	1	0	1	1
1682	3287	1	C	3238	T	40	3	37	1.22	5	2	3	3238	2092	1146	4	1	3	40	3	37	2092	1146	6	MT-RNR2	rRNA	1	0	1	1
1683	12956	9	C	12934	T	11	4	7	0.08	6	1	5	12934	11776	1158	5	5	0	11	4	7	11776	1158	5	MT-RNR2	rRNA	1	0	1	1
1684	14310	0	C	14249	T	37	10	27	0.26	14	12	2	14249	13063	1186	10	7	3	37	10	27	13063	1186	4	MT-RNR2	rRNA	1	0	1	0
1685	20111	0	C	20076	T	19	12	7	0.09	11	7	4	20076	18866	1210	5	1	4	19	12	7	18866	1210	3	MT-RNR2	rRNA	1	0	1	0
1686	21204	1	A	21141	C	30	21	9	0.14	21141	19876	1265	30	21	9	22	17	5	11	3	8	19876	1265	1	MT-RNR2	rRNA	1	0	1	0
1687	21826	5	A	21762	G	27	21	6	0.12	21762	20496	1266	17	8	9	27	21	6	20	8	12	20496	1266	0	MT-RNR2	rRNA	0	0	1	0
1688	26574	0	A	26432	G	56	38	18	0.21	26432	25085	1347	47	34	13	56	38	18	39	16	23	25085	1347	0	MT-RNR2	rRNA	0	0	1	0
1689	29053	0	C	28959	T	41	20	21	0.14	39	15	24	28959	27301	1658	14	13	1	41	20	21	27301	1658	0	MT-RNR2	rRNA	0	0	1	0
1690	30205	2	C	30131	T	49	15	34	0.16	16	12	4	30131	28377	1754	9	5	4	49	15	34	28377	1754	0	MT-RNR2	rRNA	0	0	1	0
1691	30416	0	C	30380	T	14	9	5	0.05	11	4	7	30380	28612	1768	11	2	9	14	9	5	28612	1768	0	MT-RNR2	rRNA	0	0	1	0
1692	30443	0	A	30352	T	57	7	50	0.19	30352	28907	1445	13	11	2	21	17	4	57	7	50	28907	1445	0	MT-RNR2	rRNA	0	0	1	0
1693	36448	2	C	36409	T	27	8	19	0.07	6	1	5	36409	34211	2198	6	2	4	27	8	19	34211	2198	0	MT-RNR2	rRNA	0	0	1	0
1694	36602	4	T	36538	C	38	17	21	0.1	16	11	5	38	17	21	10	6	4	36538	34425	2113	34425	2113	0	MT-RNR2	rRNA	0	0	1	0
1695	37451	1	C	37396	T	41	19	22	0.11	9	5	4	37396	35100	2296	5	3	2	41	19	22	35100	2296	0	MT-RNR2	rRNA	0	0	1	0
1696	38835	3	C	38807	T	18	12	6	0.05	6	4	2	38807	36469	2338	4	2	2	18	12	6	36469	2338	0	MT-RNR2	rRNA	0	0	1	0
1697	38727	0	A	38686	T	19	7	12	0.05	38686	36533	2153	7	2	5	15	14	1	19	7	12	36533	2153	0	MT-RNR2	rRNA	0	0	1	0
1698	39976	0	C	39957	T	18	11	7	0.05	0	0	0	39957	37309	2648	1	1	0	18	11	7	37309	2648	0	MT-RNR2	rRNA	0	0	1	0
1699	41332	0	C	41321	T	8	6	2	0.02	2	2	0	41321	38652	2669	1	1	0	8	6	2	38652	2669	0	MT-RNR2	rRNA	0	0	1	1
1700	41662	0	T	41647	C	9	9	0	0.02	4	4	0	9	9	0	2	1	1	41647	38977	2670	38977	2670	0	MT-RNR2	rRNA	0	0	1	1
1701	41719	0	T	41713	C	5	5	0	0.01	1	0	1	5	5	0	0	0	0	41713	38999	2714	38999	2714	0	MT-RNR2	rRNA	0	0	1	1
1702	41767	0	A	41745	C	11	0	11	0.03	41745	38954	2791	11	0	11	7	6	1	4	3	1	38954	2791	0	MT-RNR2	rRNA	0	0	1	1
1703	42564	0	C	42542	T	15	9	6	0.04	2	2	0	42542	39536	3006	5	2	3	15	9	6	39536	3006	0	MT-RNR2	rRNA	0	0	1	0
1704	43106	0	T	43078	G	16	5	11	0.04	5	2	3	7	7	0	16	5	11	43078	40069	3009	40069	3009	0	MT-RNR2	rRNA	0	0	1	0
1705	43732	0	A	43712	G	10	9	1	0.02	43712	40553	3159	4	4	0	10	9	1	6	3	3	40553	3159	0	MT-RNR2	rRNA	0	0	1	1
1706	44225	3	C	44196	T	19	7	12	0.04	7	7	0	44196	40854	3342	3	3	0	19	7	12	40854	3342	0	MT-RNR2	rRNA	0	0	1	0
1707	44958	0	C	44931	T	21	12	9	0.05	4	1	3	44931	41375	3556	2	2	0	21	12	9	41375	3556	0	MT-RNR2	rRNA	0	0	1	0
1708	46956	0	A	46906	T	24	5	19	0.05	46906	43097	3809	7	3	4	19	17	2	24	5	19	43097	3809	0	MT-RNR2	rRNA	0	0	1	0
1709	49237	1	G	49216	T	12	9	3	0.02	4	3	1	5	2	3	49216	45170	4046	12	9	3	45170	4046	0	MT-RNR2	rRNA	0	0	1	1
1710	49449	0	A	49419	G	17	15	2	0.03	49419	45422	3997	5	2	3	17	15	2	8	4	4	45422	3997	0	MT-RNR2	rRNA	0	0	1	1
1711	50552	15	C	50521	T	17	13	4	0.03	8	6	2	50521	46419	4102	6	5	1	17	13	4	46419	4102	0	MT-RNR2	rRNA	0	0	1	1
1712	50647	0	A	50628	G	10	8	2	0.02	50628	46443	4185	5	2	3	10	8	2	4	1	3	46443	4185	0	MT-RNR2	rRNA	0	0	1	1
1713	50454	0	A	50431	G	13	9	4	0.03	50431	46410	4021	5	2	3	13	9	4	5	2	3	46410	4021	0	MT-RNR2	rRNA	0	0	1	1
1714	51267	0	C	51246	T	14	9	5	0.03	2	1	1	51246	46975	4271	5	4	1	14	9	5	46975	4271	0	MT-RNR2	rRNA	0	0	1	0
1715	55236	3	C	55214	T	12	9	3	0.02	7	5	2	55214	50435	4779	3	3	0	12	9	3	50435	4779	0	MT-RNR2	rRNA	0	0	1	1
1716	55776	0	T	55750	C	21	17	4	0.04	2	0	2	21	17	4	3	3	0	55750	50503	5247	50503	5247	0	MT-RNR2	rRNA	0	0	1	1
1717	59896	0	T	59841	C	28	7	21	0.05	5	0	5	28	7	21	22	1	21	59841	50433	9408	50433	9408	0	MT-RNR2	rRNA	0	0	1	0
1718	60572	0	A	60525	T	31	9	22	0.05	60525	51005	9520	10	2	8	6	5	1	31	9	22	51005	9520	0	MT-RNR2	rRNA	0	0	1	0
1719	61545	0	G	61471	T	53	20	33	0.09	8	8	0	13	8	5	61471	51715	9756	53	20	33	51715	9756	0	MT-RNR2	rRNA	0	0	1	0
1720	61776	0	C	61746	T	21	14	7	0.03	6	6	0	61746	51975	9771	3	2	1	21	14	7	51975	9771	0	MT-RNR2	rRNA	0	0	1	0
1721	62015	1	C	61974	T	35	12	23	0.06	4	4	0	61974	52232	9742	2	2	0	35	12	23	52232	9742	0	MT-RNR2	rRNA	0	0	1	0
1722	63541	1	A	63520	G	12	10	2	0.02	63520	53479	10041	2	1	1	12	10	2	7	6	1	53479	10041	0	MT-RNR2	rRNA	0	0	1	1
1723	63874	2	A	63860	G	10	7	3	0.02	63860	53660	10200	2	2	0	10	7	3	2	1	1	53660	10200	0	MT-RNR2	rRNA	0	0	1	1
1724	63820	0	A	63803	T	7	2	5	0.01	63803	53773	10030	3	2	1	7	5	2	7	2	5	53773	10030	0	MT-RNR2	rRNA	0	0	1	1
1725	64170	1	C	64144	T	20	15	5	0.03	4	3	1	64144	53786	10358	2	2	0	20	15	5	53786	10358	0	MT-RNR2	rRNA	0	0	1	0
1726	65000	2	C	64982	T	10	5	5	0.02	7	6	1	64982	54616	10366	1	0	1	10	5	5	54616	10366	0	MT-RNR2	rRNA	0	0	1	0
1727	66723	0	A	66691	G	18	11	7	0.03	66691	55636	11055	4	1	3	18	11	7	10	3	7	55636	11055	0	MT-RNR2	rRNA	0	0	1	0
1728	67516	0	T	67472	A	34	15	19	0.05	34	15	19	9	4	5	1	0	1	67472	55873	11599	55873	11599	0	MT-RNR2	rRNA	0	0	1	0
1729	67622	0	T	67607	C	8	7	1	0.01	2	2	0	8	7	1	5	3	2	67607	55894	11713	55894	11713	0	MT-RNR2	rRNA	0	0	1	1
1730	68425	0	T	68390	C	28	9	19	0.04	2	2	0	28	9	19	5	2	3	68390	55966	12424	55966	12424	0	MT-RNR2	rRNA	0	0	1	0
1731	68713	0	A	68668	T	31	10	21	0.05	68668	55913	12755	4	3	1	10	10	0	31	10	21	55913	12755	0	MT-RNR2	rRNA	0	0	1	0
1732	74363	1	C	74327	T	23	18	5	0.03	9	6	3	74327	57473	16854	4	3	1	23	18	5	57473	16854	0	MT-RNR2	rRNA	0	0	1	0
1733	74509	0	C	74483	T	18	12	6	0.02	5	4	1	74483	57556	16927	3	3	0	18	12	6	57556	16927	0	MT-RNR2	rRNA	0	0	1	0
1734	75316	0	C	75270	T	26	15	11	0.03	11	10	1	75270	57689	17581	9	3	6	26	15	11	57689	17581	0	MT-RNR2	rRNA	0	0	1	0
1735	75776	3	A	75730	C	25	17	8	0.03	75730	57859	17871	25	17	8	14	8	6	7	4	3	57859	17871	0	MT-RNR2	rRNA	0	0	1	0
1736	75907	4	A	75878	T	13	5	8	0.02	75878	57918	17960	9	4	5	7	5	2	13	5	8	57918	17960	0	MT-RNR2	rRNA	0	0	1	0
1737	76891	0	A	76857	G	17	13	4	0.02	76857	58738	18119	3	1	2	17	13	4	14	7	7	58738	18119	0	MT-RNR2	rRNA	0	0	1	1
1738	79253	0	T	79198	A	36	26	10	0.05	36	26	10	9	5	4	10	6	4	79198	58922	20276	58922	20276	0	MT-RNR2	rRNA	0	0	1	0
1739	80373	2	A	80315	T	37	26	11	0.05	80315	59255	21060	8	7	1	13	10	3	37	26	11	59255	21060	0	MT-RNR2	rRNA	0	0	1	0
1740	80496	4	A	80474	G	9	9	0	0.01	80474	59260	21214	8	4	4	9	9	0	5	4	1	59260	21214	0	MT-RNR2	rRNA	0	0	1	1
1741	81004	0	A	80971	T	16	8	8	0.02	80971	59153	21818	6	5	1	11	8	3	16	8	8	59153	21818	0	MT-RNR2	rRNA	0	0	1	0
1742	82138	0	G	82116	C	12	5	7	0.01	5	1	4	12	5	7	82116	59313	22803	5	4	1	59313	22803	0	MT-RNR2	rRNA	0	0	1	0
1743	81408	1	T	81387	C	15	9	6	0.02	2	0	2	15	9	6	4	1	3	81387	58378	23009	58378	23009	0	MT-RNR2	rRNA	0	0	1	0
1744	82710	0	A	82674	G	18	11	7	0.02	82674	59295	23379	8	5	3	18	11	7	10	8	2	59295	23379	0	MT-RNR2	rRNA	0	0	1	0
1745	82772	1	T	82753	C	12	8	4	0.01	4	2	2	12	8	4	3	2	1	82753	59339	23414	59339	23414	0	MT-RNR2	rRNA	0	0	1	1
1746	83330	1	A	83302	G	13	9	4	0.02	83302	59701	23601	4	3	1	13	9	4	11	8	3	59701	23601	0	MT-RNR2	rRNA	0	0	1	1
1747	83664	0	G	83646	T	14	10	4	0.02	2	2	0	2	0	2	83646	59935	23711	14	10	4	59935	23711	0	MT-RNR2	rRNA	0	0	1	1
1748	83821	0	G	83802	A	8	6	2	0.01	8	6	2	3	2	1	83802	60168	23634	8	5	3	60168	23634	0	MT-RNR2	rRNA	0	0	1	1
1749	84061	0	C	84030	T	18	11	7	0.02	7	7	0	84030	60270	23760	6	4	2	18	11	7	60270	23760	0	MT-RNR2	rRNA	0	0	1	0
1750	84559	0	G	84531	A	13	10	3	0.02	13	10	3	6	4	2	84531	60378	24153	9	5	4	60378	24153	0	MT-RNR2	rRNA	0	0	1	1
1751	85430	0	A	85398	T	19	4	15	0.02	85398	60106	25292	9	6	3	4	2	2	19	4	15	60106	25292	0	MT-RNR2	rRNA	0	0	1	1
1752	88540	2	T	88506	A	15	5	10	0.02	15	5	10	13	6	7	6	1	5	88506	62231	26275	62231	26275	0	MT-RNR2	rRNA	0	0	1	0
1753	89945	0	A	89914	T	13	4	9	0.01	89914	62691	27223	5	1	4	13	11	2	13	4	9	62691	27223	0	MT-RNR2	rRNA	0	0	1	1
1754	90490	0	G	90453	T	21	12	9	0.02	2	1	1	14	7	7	90453	63038	27415	21	12	9	63038	27415	0	MT-RNR2	rRNA	0	0	1	0
1755	91300	0	A	91258	G	19	12	7	0.02	91258	62997	28261	13	1	12	19	12	7	10	4	6	62997	28261	0	MT-RNR2	rRNA	0	0	1	0
1756	91584	5	A	91539	T	21	3	18	0.02	91539	63179	28360	6	1	5	18	12	6	21	3	18	63179	28360	0	MT-RNR2	rRNA	0	0	1	1
1757	92727	0	A	92699	G	12	7	5	0.01	92699	64231	28468	6	1	5	12	7	5	10	2	8	64231	28468	0	MT-RNR2	rRNA	0	0	1	0
1758	93456	0	T	93434	C	12	10	2	0.01	4	2	2	12	10	2	6	4	2	93434	64925	28509	64925	28509	0	MT-RNR2	rRNA	0	0	1	1
1759	94016	1	T	93995	C	16	10	6	0.02	2	2	0	16	10	6	3	1	2	93995	65402	28593	65402	28593	0	MT-RNR2	rRNA	0	0	1	0
1760	94622	0	G	94597	C	11	8	3	0.01	10	8	2	11	8	3	94597	65779	28818	4	3	1	65779	28818	0	MT-RNR2	rRNA	0	0	1	1
1761	94723	0	A	94699	G	18	13	5	0.02	94699	65847	28852	1	1	0	18	13	5	5	4	1	65847	28852	0	MT-RNR2	rRNA	0	0	1	0
1762	94659	1	A	94642	G	12	11	1	0.01	94642	65879	28763	4	1	3	12	11	1	1	1	0	65879	28763	0	MT-RNR2	rRNA	0	0	1	1
1763	93155	0	A	93133	G	11	10	1	0.01	93133	65885	27248	4	3	1	11	10	1	7	4	3	65885	27248	0	MT-RNR2	rRNA	0	0	1	1
1764	95069	0	C	95035	A	16	12	4	0.02	16	12	4	95035	65862	29173	4	4	0	14	10	4	65862	29173	0	MT-RNR2	rRNA	0	0	1	1
1765	95455	0	C	95428	T	17	10	7	0.02	7	5	2	95428	66218	29210	3	3	0	17	10	7	66218	29210	0	MT-RNR2	rRNA	0	0	1	0
1766	95735	1	T	95686	C	34	10	24	0.04	5	0	5	34	10	24	10	2	8	95686	66106	29580	66106	29580	0	MT-RNR2	rRNA	0	0	1	0
1767	95984	0	G	95947	A	16	9	7	0.02	16	9	7	5	2	3	95947	66048	29899	16	15	1	66048	29899	0	MT-RNR2	rRNA	0	0	1	0
1768	96036	0	G	95994	A	17	11	6	0.02	17	11	6	8	5	3	95994	66174	29820	17	14	3	66174	29820	0	MT-RNR2	rRNA	0	0	1	0
1769	96117	0	C	96065	T	28	16	12	0.03	10	7	3	96065	66223	29842	14	10	4	28	16	12	66223	29842	0	MT-RNR2	rRNA	0	0	1	0
1770	96757	0	G	96698	A	26	14	12	0.03	26	14	12	16	9	7	96698	66650	30048	17	14	3	66650	30048	0	MT-RNR2	rRNA	0	0	1	0
1771	97482	0	C	97453	T	19	10	9	0.02	8	5	3	97453	66860	30593	2	1	1	19	10	9	66860	30593	0	MT-RNR2	rRNA	0	0	1	0
1772	97892	1	A	97869	G	17	10	7	0.02	97869	67040	30829	3	3	0	17	10	7	3	3	0	67040	30829	0	MT-RNR2	rRNA	0	0	1	0
1773	97672	1	A	97636	G	16	11	5	0.02	97636	66741	30895	9	8	1	16	11	5	11	6	5	66741	30895	0	MT-RNR2	rRNA	0	0	1	0
1774	97967	1	T	97954	C	11	8	3	0.01	0	0	0	11	8	3	2	1	1	97954	67065	30889	67065	30889	0	MT-RNR2	rRNA	0	0	1	1
1775	98727	0	A	98688	G	20	16	4	0.02	98688	67760	30928	6	2	4	20	16	4	13	8	5	67760	30928	0	MT-RNR2	rRNA	0	0	1	1
1776	99236	0	G	99213	T	15	6	9	0.02	4	4	0	4	0	4	99213	68115	31098	15	6	9	68115	31098	0	MT-RNR2	rRNA	0	0	1	0
1777	99485	0	A	99454	G	20	17	3	0.02	99454	68361	31093	6	5	1	20	17	3	5	5	0	68361	31093	0	MT-RNR2	rRNA	0	0	1	1
1778	99493	0	T	99424	G	38	25	13	0.04	16	16	0	15	13	2	38	25	13	99424	68388	31036	68388	31036	0	MT-RNR2	rRNA	0	0	1	0
1779	100296	2	A	100269	G	13	10	3	0.01	100269	69055	31214	12	10	2	13	10	3	2	2	0	69055	31214	0	MT-RNR2	rRNA	0	0	1	1
1780	100875	0	T	100790	G	41	39	2	0.04	25	23	2	19	10	9	41	39	2	100790	69333	31457	69333	31457	0	MT-RNR2	rRNA	0	0	1	1
1781	101753	0	A	101677	G	38	32	6	0.04	101677	69870	31807	16	15	1	38	32	6	22	16	6	69870	31807	0	MT-RNR2	rRNA	0	0	1	0
1782	102241	0	G	102145	A	56	52	4	0.05	56	52	4	12	7	5	102145	69750	32395	28	24	4	69750	32395	0	MT-RNR2	rRNA	0	0	1	1
1783	91489	2	T	91391	C	56	27	29	0.06	14	11	3	56	27	29	28	24	4	91391	58400	32991	58400	32991	0	MT-RNR2	rRNA	0	0	1	0
1784	91609	6	A	91531	C	34	26	8	0.04	91531	58553	32978	34	26	8	25	19	6	19	8	11	58553	32978	0	MT-RNR2	rRNA	0	0	1	0
1785	89238	0	C	89163	T	42	26	16	0.05	17	12	5	89163	55353	33810	16	16	0	42	26	16	55353	33810	0	MT-RNR2	rRNA	0	0	1	0
1786	90054	0	C	89982	A	41	39	2	0.05	41	39	2	89982	55728	34254	2	1	1	29	15	14	55728	34254	0	MT-RNR2	rRNA	0	0	1	1
1787	91665	0	G	91613	T	20	12	8	0.02	19	11	8	13	6	7	91613	55596	36017	20	12	8	55596	36017	0	MT-RNR2	rRNA	0	0	1	0
1788	87579	0	C	87458	A	82	70	12	0.09	82	70	12	87458	51322	36136	16	10	6	23	11	12	51322	36136	0	MT-RNR2	rRNA	0	0	1	0
1789	85753	6	A	85550	G	165	95	70	0.19	85550	49017	36533	14	10	4	165	95	70	24	11	13	49017	36533	0	MT-RNR2	rRNA	0	0	1	0
1790	84833	5	A	84766	G	29	22	7	0.03	84766	48078	36688	20	11	9	29	22	7	18	2	16	48078	36688	0	MT-RNR2	rRNA	0	0	1	0
1791	85283	1	G	85179	T	59	46	13	0.07	28	20	8	17	0	17	85179	48396	36783	59	46	13	48396	36783	0	MT-RNR2	rRNA	0	0	1	0
1792	86543	6	G	86426	C	48	46	2	0.06	40	35	5	48	46	2	86426	49689	36737	29	12	17	49689	36737	0	MT-RNR2	rRNA	0	0	1	1
1793	82809	1	G	82761	A	26	19	7	0.03	26	19	7	10	4	6	82761	46398	36363	12	8	4	46398	36363	0	MT-RNR2	rRNA	0	0	1	0
1794	83144	2	A	83091	G	43	31	12	0.05	83091	45888	37203	9	6	3	43	31	12	1	0	1	45888	37203	0	MT-RNR2	rRNA	0	0	1	0
1795	83776	0	A	83722	G	32	8	24	0.04	83722	45622	38100	7	2	5	32	8	24	15	12	3	45622	38100	0	MT-RNR2	rRNA	0	0	1	0
1796	82502	0	A	82450	G	23	14	9	0.03	82450	44258	38192	15	4	11	23	14	9	14	10	4	44258	38192	0	MT-RNR2	rRNA	0	0	1	0
1797	82470	0	G	82425	T	23	4	19	0.03	11	7	4	11	8	3	82425	44291	38134	23	4	19	44291	38134	0	MT-RNR2	rRNA	0	0	1	1
1798	81621	0	A	81574	G	25	21	4	0.03	81574	43589	37985	19	1	18	25	21	4	3	1	2	43589	37985	0	MT-RNR2	rRNA	0	0	1	1
1799	80687	0	T	80649	C	23	11	12	0.03	5	1	4	23	11	12	10	4	6	80649	42260	38389	42260	38389	0	MT-RNR2	rRNA	0	0	1	0
1800	84616	6	G	84550	T	32	8	24	0.04	20	8	12	14	4	10	84550	44513	40037	32	8	24	44513	40037	2	MT-RNR2	rRNA	1	0	1	0
1801	86425	21	A	86378	G	32	14	18	0.04	86378	46185	40193	5	0	5	32	14	18	10	1	9	46185	40193	2	MT-RNR2	rRNA	1	0	1	0
1802	87352	0	A	87309	G	30	10	20	0.03	87309	46739	40570	3	2	1	30	10	20	10	0	10	46739	40570	5	MT-RNR2	rRNA	1	0	1	0
1803	86875	0	A	86839	G	23	14	9	0.03	86839	46310	40529	9	4	5	23	14	9	4	1	3	46310	40529	4	MT-RNR2	rRNA	1	0	1	0
1804	86337	0	A	86308	G	16	11	5	0.02	86308	45649	40659	0	0	0	16	11	5	13	7	6	45649	40659	3	MT-RNR2	rRNA	1	0	1	0
1805	86957	0	A	86924	G	19	12	7	0.02	86924	45407	41517	3	3	0	19	12	7	11	11	0	45407	41517	1	MT-RNR2	rRNA	1	0	1	0
1806	87496	0	T	87447	C	17	12	5	0.02	15	13	2	17	12	5	17	14	3	87447	45169	42278	45169	42278	1	MT-RNR2	rRNA	1	0	1	0
1807	89043	0	T	88988	A	35	23	12	0.04	35	23	12	12	8	4	8	4	4	88988	44790	44198	44790	44198	0	MT-RNR2	rRNA	0	0	1	0
1808	87480	0	A	87434	G	20	12	8	0.02	87434	43231	44203	7	4	3	20	12	8	19	12	7	43231	44203	0	MT-RNR2	rRNA	0	0	1	0
1809	85349	12	T	85301	C	21	8	13	0.02	18	7	11	21	8	13	9	6	3	85301	41080	44221	41080	44221	0	MT-RNR2	rRNA	0	0	1	0
1810	85235	2	A	85185	G	23	17	6	0.03	85185	40916	44269	8	2	6	23	17	6	19	8	11	40916	44269	0	MT-RNR2	rRNA	0	0	1	0
1811	85196	1	G	85136	C	22	11	11	0.03	20	11	9	22	11	11	85136	40251	44885	18	10	8	40251	44885	0	MT-RNR2	rRNA	0	0	1	0
1812	84616	0	C	84563	T	27	13	14	0.03	20	12	8	84563	39779	44784	6	5	1	27	13	14	39779	44784	0	MT-RNR2	rRNA	0	0	1	0
1813	84911	0	C	84866	T	22	9	13	0.03	16	11	5	84866	39939	44927	7	7	0	22	9	13	39939	44927	0	MT-RNR2	rRNA	0	0	1	0
1814	89252	2	A	89076	G	144	12	132	0.16	89076	39834	49242	21	3	18	144	12	132	11	5	6	39834	49242	0	MT-RNR2	rRNA	0	0	1	0
1815	85712	0	A	85632	G	44	5	39	0.05	85632	36397	49235	7	0	7	44	5	39	29	3	26	36397	49235	0	MT-RNR2	rRNA	0	0	1	0
1816	87320	0	G	87226	A	53	17	36	0.06	53	17	36	18	7	11	87226	36807	50419	23	7	16	36807	50419	0	MT-RNR2	rRNA	0	0	1	0
1817	83381	21	C	83288	A	49	29	20	0.06	49	29	20	83288	36728	46560	27	26	1	17	5	12	36728	46560	0	MT-RNR2	rRNA	0	0	1	0
1818	83061	1	A	82866	G	180	21	159	0.22	82866	36464	46402	9	5	4	180	21	159	6	3	3	36464	46402	0	MT-RNR2	rRNA	0	0	1	0
1819	84011	2	T	83960	C	24	14	10	0.03	21	7	14	24	14	10	6	1	5	83960	35678	48282	35678	48282	0	MT-RNR2	rRNA	0	0	1	0
1820	84180	1	A	84128	C	38	24	14	0.05	84128	35578	48550	38	24	14	8	3	5	6	4	2	35578	48550	0	MT-RNR2	rRNA	0	0	1	0
1821	84264	5	A	84229	G	17	11	6	0.02	84229	35382	48847	15	0	15	17	11	6	3	2	1	35382	48847	0	MT-RNR2	rRNA	0	0	1	0
1822	82755	0	T	82706	G	17	1	16	0.02	16	8	8	16	4	12	17	1	16	82706	34113	48593	34113	48593	0	MT-RNR2	rRNA	0	0	1	1
1823	82729	7	A	82711	G	7	5	2	0.01	82711	34098	48613	6	3	3	7	5	2	5	2	3	34098	48613	0	MT-RNR2	rRNA	0	0	1	1
1824	82474	0	T	82439	C	19	5	14	0.02	10	7	3	19	5	14	6	4	2	82439	33860	48579	33860	48579	0	MT-RNR2	rRNA	0	0	1	0
1825	82624	0	A	82582	C	24	2	22	0.03	82582	34018	48564	24	2	22	9	5	4	9	2	7	34018	48564	0	MT-RNR2	rRNA	0	0	1	1
1826	83507	0	G	83445	T	37	8	29	0.04	11	5	6	14	6	8	83445	34862	48583	37	8	29	34862	48583	0	MT-RNR2	rRNA	0	0	1	0
1827	83830	1	C	83776	T	24	7	17	0.03	23	14	9	83776	35901	47875	7	3	4	24	7	17	35901	47875	0	MT-RNR2	rRNA	0	0	1	0
1828	84187	0	A	84111	G	63	8	55	0.07	84111	36418	47693	5	1	4	63	8	55	8	2	6	36418	47693	0	MT-RNR2	rRNA	0	0	1	0
1829	84267	0	A	84228	G	18	9	9	0.02	84228	36457	47771	9	5	4	18	9	9	12	3	9	36457	47771	0	MT-RNR2	rRNA	0	0	1	0
1830	83973	0	G	83940	A	15	9	6	0.02	15	9	6	4	3	1	83940	36649	47291	14	5	9	36649	47291	0	MT-RNR2	rRNA	0	0	1	0
1831	83488	0	G	83424	A	42	8	34	0.05	42	8	34	14	2	12	83424	36465	46959	8	3	5	36465	46959	0	MT-RNR2	rRNA	0	0	1	0
1832	77894	0	A	77869	T	13	2	11	0.02	77869	35090	42779	3	1	2	9	1	8	13	2	11	35090	42779	0	MT-RNR2	rRNA	0	0	1	1
1833	79477	0	C	79409	G	28	14	14	0.04	20	5	15	79409	35843	43566	28	14	14	20	8	12	35843	43566	0	MT-RNR2	rRNA	0	0	1	0
1834	78924	0	T	78789	A	71	13	58	0.09	71	13	58	18	3	15	46	3	43	78789	35742	43047	35742	43047	0	MT-RNR2	rRNA	0	0	1	0
1835	78681	0	A	78640	G	23	9	14	0.03	78640	35839	42801	7	4	3	23	9	14	11	11	0	35839	42801	0	MT-RNR2	rRNA	0	0	1	0
1836	76829	0	A	76794	G	17	8	9	0.02	76794	35763	41031	12	9	3	17	8	9	6	1	5	35763	41031	2	MT-RNR2	rRNA	1	0	1	0
1837	78297	4	C	78286	T	7	6	1	0.01	3	0	3	78286	35242	43044	1	1	0	7	6	1	35242	43044	6	MT-RNR2	rRNA	1	0	1	1
1838	76406	0	C	76366	T	20	5	15	0.03	16	9	7	76366	35112	41254	4	3	1	20	5	15	35112	41254	5	MT-RNR2	rRNA	1	0	1	0
1839	76400	0	C	76374	T	14	8	6	0.02	7	3	4	76374	35337	41037	5	1	4	14	8	6	35337	41037	4	MT-RNR2	rRNA	1	0	1	0
1840	79186	0	C	79086	G	60	1	59	0.08	22	4	18	79086	35615	43471	60	1	59	18	7	11	35615	43471	3	MT-RNR2	rRNA	1	0	1	1
1841	78825	2	T	77981	A	400	7	393	0.51	400	7	393	52	5	47	392	0	392	77981	35927	42054	35927	42054	1	MT-RNR2	rRNA	1	0	1	0
1842	79692	0	A	79617	G	56	8	48	0.07	79617	36069	43548	10	6	4	56	8	48	9	2	7	36069	43548	0	MT-RNR2	rRNA	0	0	1	0
1843	80517	0	T	80442	A	40	4	36	0.05	40	4	36	23	5	18	12	3	9	80442	36053	44389	36053	44389	0	MT-RNR2	rRNA	0	0	1	1
1844	78866	0	A	78811	C	41	3	38	0.05	78811	36011	42800	41	3	38	9	4	5	5	3	2	36011	42800	0	MT-RNR2	rRNA	0	0	1	1
1845	83581	0	C	83493	T	65	13	52	0.08	8	5	3	83493	35986	47507	15	7	8	65	13	52	35986	47507	0	MT-RNR2	rRNA	0	0	1	0
1846	84038	1	C	83993	T	20	9	11	0.02	16	5	11	83993	36540	47453	9	4	5	20	9	11	36540	47453	0	MT-RNR2	rRNA	0	0	1	0
1847	84147	1	T	84100	C	27	8	19	0.03	11	4	7	27	8	19	9	2	7	84100	36653	47447	36653	47447	0	MT-RNR2	rRNA	0	0	1	0
1848	83826	0	T	83773	C	42	4	38	0.05	1	0	1	42	4	38	10	2	8	83773	36484	47289	36484	47289	0	MT-RNR2	rRNA	0	0	1	1
1849	84422	1	C	84403	T	12	2	10	0.01	4	2	2	84403	36646	47757	3	0	3	12	2	10	36646	47757	0	MT-RNR2	rRNA	0	0	1	1
1850	86480	3	T	86422	C	41	18	23	0.05	9	1	8	41	18	23	8	3	5	86422	36875	49547	36875	49547	0	MT-RNR2	rRNA	0	0	1	0
1851	85802	1	G	85736	A	28	18	10	0.03	28	18	10	19	6	13	85736	37082	48654	19	8	11	37082	48654	0	MT-RNR2	rRNA	0	0	1	0
1852	82827	11	C	82778	T	25	5	20	0.03	9	4	5	82778	34945	47833	15	10	5	25	5	20	34945	47833	0	MT-RNR2	rRNA	0	0	1	0
1853	81774	3	A	81713	G	34	7	27	0.04	81713	34620	47093	11	3	8	34	7	27	16	4	12	34620	47093	0	MT-RNR2	rRNA	0	0	1	0
1854	81642	0	T	81286	A	304	8	296	0.37	304	8	296	27	6	21	25	11	14	81286	34479	46807	34479	46807	0	MT-RNR2	rRNA	0	0	1	0
1855	81184	1	A	81128	G	38	6	32	0.05	81128	34754	46374	13	10	3	38	6	32	5	0	5	34754	46374	0	MT-RNR2	rRNA	0	0	1	0
1856	81135	1	A	81082	G	31	23	8	0.04	81082	34724	46358	6	1	5	31	23	8	16	12	4	34724	46358	0	MT-RNR2	rRNA	0	0	1	0
1857	80038	0	T	79991	A	26	10	16	0.03	26	10	16	14	8	6	7	4	3	79991	33814	46177	33814	46177	0	MT-RNR2	rRNA	0	0	1	0
1858	79388	0	G	79354	A	16	6	10	0.02	16	6	10	7	2	5	79354	33281	46073	11	8	3	33281	46073	0	MT-RNR2	rRNA	0	0	1	0
1859	79239	0	A	79196	G	31	8	23	0.04	79196	33028	46168	6	2	4	31	8	23	6	1	5	33028	46168	0	MT-RNR2	rRNA	0	0	1	0
1860	80145	1	A	80111	G	22	5	17	0.03	80111	33595	46516	7	2	5	22	5	17	5	1	4	33595	46516	0	MT-RNR2	rRNA	0	0	1	0
1861	80065	0	T	80027	A	26	2	24	0.03	26	2	24	7	4	3	5	2	3	80027	33628	46399	33628	46399	0	MT-RNR2	rRNA	0	0	1	1
1862	80108	0	T	80084	C	13	7	6	0.02	5	2	3	13	7	6	6	1	5	80084	33671	46413	33671	46413	0	MT-RNR2	rRNA	0	0	1	0
1863	80156	0	A	80118	G	22	13	9	0.03	80118	33658	46460	5	1	4	22	13	9	11	4	7	33658	46460	0	MT-RNR2	rRNA	0	0	1	0
1864	80437	0	A	80410	T	13	3	10	0.02	80410	33759	46651	6	2	4	8	2	6	13	3	10	33759	46651	0	MT-RNR2	rRNA	0	0	1	1
1865	82094	0	C	82063	T	24	13	11	0.03	7	2	5	82063	34862	47201	0	0	0	24	13	11	34862	47201	0	MT-RNR2	rRNA	0	0	1	0
1866	81781	1	T	81746	C	24	7	17	0.03	6	2	4	24	7	17	5	0	5	81746	34981	46765	34981	46765	0	MT-RNR2	rRNA	0	0	1	0
1867	82199	0	A	82157	G	24	12	12	0.03	82157	34926	47231	8	1	7	24	12	12	10	3	7	34926	47231	0	MT-RNR2	rRNA	0	0	1	0
1868	82335	0	G	82291	T	22	8	14	0.03	13	5	8	9	3	6	82291	35011	47280	22	8	14	35011	47280	0	MT-RNR2	rRNA	0	0	1	0
1869	83597	0	A	83562	G	26	8	18	0.03	83562	35579	47983	2	0	2	26	8	18	7	1	6	35579	47983	0	MT-RNR2	rRNA	0	0	1	0
1870	84460	9	A	84398	G	45	11	34	0.05	84398	35735	48663	6	0	6	45	11	34	11	3	8	35735	48663	0	MT-RNR2	rRNA	0	0	1	0
1871	84082	1	A	84028	G	33	9	24	0.04	84028	35787	48241	7	1	6	33	9	24	14	2	12	35787	48241	0	MT-RNR2	rRNA	0	0	1	0
1872	84635	0	T	84598	G	14	7	7	0.02	11	0	11	12	2	10	14	7	7	84598	35778	48820	35778	48820	0	MT-RNR2	rRNA	0	0	1	0
1873	84994	0	A	84979	G	6	2	4	0.01	84979	35964	49015	4	2	2	6	2	4	5	0	5	35964	49015	0	MT-RNR2	rRNA	0	0	1	1
1874	84381	0	A	84338	T	21	10	11	0.02	84338	35633	48705	6	0	6	16	7	9	21	10	11	35633	48705	0	MT-RNR2	rRNA	0	0	1	0
1875	85668	0	C	85641	T	17	9	8	0.02	4	2	2	85641	35743	49898	6	2	4	17	9	8	35743	49898	0	MT-RNR2	rRNA	0	0	1	0
1876	85491	3	T	85433	C	48	19	29	0.06	3	1	2	48	19	29	7	3	4	85433	35909	49524	35909	49524	0	MT-RNR2	rRNA	0	0	1	0
1877	85206	0	T	85185	C	17	5	12	0.02	2	1	1	17	5	12	2	0	2	85185	35651	49534	35651	49534	0	MT-RNR2	rRNA	0	0	1	0
1878	84719	0	T	84683	C	24	11	13	0.03	5	3	2	24	11	13	7	2	5	84683	35674	49009	35674	49009	0	MT-RNR2	rRNA	0	0	1	0
1879	85564	0	G	85519	C	19	6	13	0.02	12	7	5	19	6	13	85519	35781	49738	14	4	10	35781	49738	0	MT-RNR2	rRNA	0	0	1	0
1880	85134	0	C	85086	T	35	10	25	0.04	9	4	5	85086	35720	49366	4	4	0	35	10	25	35720	49366	0	MT-RNR2	rRNA	0	0	1	0
1881	84957	0	A	84919	G	24	9	15	0.03	84919	35430	49489	3	2	1	24	9	15	11	3	8	35430	49489	0	MT-RNR2	rRNA	0	0	1	0
1882	83766	0	A	83715	G	37	17	20	0.04	83715	35015	48700	5	2	3	37	17	20	9	5	4	35015	48700	0	MT-RNR2	rRNA	0	0	1	0
1883	83424	0	G	83406	T	10	6	4	0.01	1	0	1	7	4	3	83406	35290	48116	10	6	4	35290	48116	0	MT-RNR2	rRNA	0	0	1	1
1884	83038	3	G	82947	A	70	15	55	0.08	70	15	55	13	1	12	82947	35372	47575	8	2	6	35372	47575	0	MT-RNR2	rRNA	0	0	1	0
1885	80350	4	A	80229	G	83	15	68	0.1	80229	33078	47151	22	3	19	83	15	68	16	1	15	33078	47151	0	MT-RNR2	rRNA	0	0	1	0
1886	78747	1	G	78696	A	31	4	27	0.04	31	4	27	12	2	10	78696	31753	46943	8	4	4	31753	46943	0	MT-RNR2	rRNA	0	0	1	1
1887	76546	1	A	76434	G	74	5	69	0.1	76434	31011	45423	13	0	13	74	5	69	25	0	25	31011	45423	0	MT-RNR2	rRNA	0	0	1	0
1888	78301	0	G	78239	T	24	15	9	0.03	18	4	14	20	7	13	78239	32965	45274	24	15	9	32965	45274	0	MT-RNR2	rRNA	0	0	1	0
1889	78522	2	C	78435	A	36	18	18	0.05	36	18	18	78435	33220	45215	27	5	22	24	10	14	33220	45215	0	MT-RNR2	rRNA	0	0	1	0
1890	79478	1	C	79385	G	38	16	22	0.05	27	11	16	79385	34485	44900	38	16	22	28	18	10	34485	44900	0	MT-RNR2	rRNA	0	0	1	0
1891	79965	5	A	79822	G	102	22	80	0.13	79822	34461	45361	28	14	14	102	22	80	13	2	11	34461	45361	0	MT-RNR2	rRNA	0	0	1	0
1892	78368	0	A	78330	G	24	12	12	0.03	78330	33094	45236	4	1	3	24	12	12	10	1	9	33094	45236	0	MT-RNR2	rRNA	0	0	1	0
1893	76880	0	A	76838	G	22	7	15	0.03	76838	31267	45571	11	0	11	22	7	15	9	1	8	31267	45571	0	MT-RNR2	rRNA	0	0	1	0
1894	76661	0	G	76633	T	17	5	12	0.02	5	3	2	6	3	3	76633	31383	45250	17	5	12	31383	45250	0	MT-RNR2	rRNA	0	0	1	0
1895	77348	0	C	77301	T	26	9	17	0.03	19	16	3	77301	32850	44451	2	2	0	26	9	17	32850	44451	0	MT-RNR2	rRNA	0	0	1	0
1896	77189	0	T	77155	G	14	8	6	0.02	7	0	7	13	7	6	14	8	6	77155	32932	44223	32932	44223	0	MT-RNR2	rRNA	0	0	1	0
1897	77895	0	A	77865	C	22	7	15	0.03	77865	33095	44770	22	7	15	7	4	3	1	0	1	33095	44770	0	MT-RNR2	rRNA	0	0	1	0
1898	77582	0	A	77520	G	24	15	9	0.03	77520	32996	44524	20	4	16	24	15	9	18	15	3	32996	44524	0	MT-RNR2	rRNA	0	0	1	0
1899	75262	1	G	75227	A	18	16	2	0.02	18	16	2	7	7	0	75227	32981	42246	10	9	1	32981	42246	0	MT-RNR2	rRNA	0	0	1	1
1900	65254	0	A	65230	G	15	6	9	0.02	65230	30591	34639	4	2	2	15	6	9	5	5	0	30591	34639	2	MT-RNR2	rRNA	1	0	1	0
1901	73129	6	C	73091	A	20	5	15	0.03	20	5	15	73091	28879	44212	5	4	1	13	4	9	28879	44212	2	MT-RNR2	rRNA	1	0	1	0
1902	72745	0	C	72699	T	33	2	31	0.05	9	4	5	72699	28459	44240	4	1	3	33	2	31	28459	44240	5	MT-RNR2	rRNA	1	0	1	1
1903	73945	0	C	73871	T	58	7	51	0.08	11	3	8	73871	29190	44681	5	2	3	58	7	51	29190	44681	4	MT-RNR2	rRNA	1	0	1	0
1904	76249	1	C	76114	G	58	4	54	0.08	39	7	32	76114	31683	44431	58	4	54	38	8	30	31683	44431	3	MT-RNR2	rRNA	1	0	1	1
1905	76889	0	C	76675	G	113	6	107	0.15	55	4	51	76675	33179	43496	113	6	107	46	15	31	33179	43496	1	MT-RNR2	rRNA	1	0	1	0
1906	76744	1	G	76490	A	162	14	148	0.21	162	14	148	42	4	38	76490	33088	43402	50	4	46	33088	43402	1	MT-RNR2	rRNA	1	0	1	0
1907	75027	1	A	74821	G	162	24	138	0.22	74821	32786	42035	27	6	21	162	24	138	17	2	15	32786	42035	0	MT-RNR2	rRNA	0	0	1	0
1908	74877	2	A	74761	G	88	25	63	0.12	74761	32990	41771	12	9	3	88	25	63	16	5	11	32990	41771	0	MT-RNR2	rRNA	0	0	1	0
1909	72218	1	A	72137	T	31	9	22	0.04	72137	33054	39083	26	16	10	24	12	12	31	9	22	33054	39083	0	MT-RNR2	rRNA	0	0	1	0
1910	75517	1	C	75470	T	40	24	16	0.05	7	4	3	75470	33045	42425	0	0	0	40	24	16	33045	42425	0	MT-RNR2	rRNA	0	0	1	0
1911	74735	1	C	74679	T	38	9	29	0.05	17	12	5	74679	33166	41513	1	1	0	38	9	29	33166	41513	0	MT-RNR2	rRNA	0	0	1	0
1912	77327	0	A	77251	G	62	31	31	0.08	77251	34930	42321	1	0	1	62	31	31	13	4	9	34930	42321	0	MT-RNR2	rRNA	0	0	1	0
1913	77571	0	G	77534	A	25	3	22	0.03	25	3	22	5	1	4	77534	35100	42434	7	1	6	35100	42434	0	MT-RNR2	rRNA	0	0	1	1
1914	71866	0	A	71774	G	60	14	46	0.08	71774	35080	36694	25	3	22	60	14	46	7	3	4	35080	36694	0	MT-RNR2	rRNA	0	0	1	0
1915	73078	0	C	72983	T	34	12	22	0.05	33	12	21	72983	35442	37541	28	13	15	34	12	22	35442	37541	0	MT-RNR2	rRNA	0	0	1	0
1916	72097	1	G	72043	A	36	15	21	0.05	36	15	21	7	1	6	72043	35050	36993	11	6	5	35050	36993	0	MT-RNR2	rRNA	0	0	1	0
1917	71774	0	A	71744	G	13	4	9	0.02	71744	34831	36913	11	0	11	13	4	9	6	2	4	34831	36913	0	MT-RNR2	rRNA	0	0	1	1
1918	72058	0	G	72025	C	13	8	5	0.02	12	0	12	13	8	5	72025	35072	36953	8	3	5	35072	36953	0	MT-RNR2	rRNA	0	0	1	0
1919	71187	0	C	71111	A	50	40	10	0.07	50	40	10	71111	35222	35889	8	2	6	18	9	9	35222	35889	0	MT-RNR2	rRNA	0	0	1	0
1920	71098	1	T	70711	G	186	39	147	0.26	180	6	174	21	7	14	186	39	147	70711	34967	35744	34967	35744	0	MT-RNR2	rRNA	0	0	1	0
1921	70144	0	A	70093	T	20	5	15	0.03	70093	35316	34777	11	2	9	20	10	10	20	5	15	35316	34777	0	MT-RNR2	rRNA	0	0	1	0
1922	72240	7	C	72182	T	49	35	14	0.07	0	0	0	72182	35543	36639	9	6	3	49	35	14	35543	36639	0	MT-RNR2	rRNA	0	0	1	0
1923	72404	0	C	72373	T	14	5	9	0.02	6	5	1	72373	36262	36111	11	8	3	14	5	9	36262	36111	0	MT-RNR2	rRNA	0	0	1	0
1924	72289	0	T	72183	G	45	36	9	0.06	36	8	28	25	11	14	45	36	9	72183	36531	35652	36531	35652	0	MT-RNR2	rRNA	0	0	1	0
1925	73338	0	A	73288	G	43	34	9	0.06	73288	36573	36715	5	4	1	43	34	9	2	2	0	36573	36715	0	MT-RNR2	rRNA	0	0	1	0
1926	71759	0	A	71738	G	16	12	4	0.02	71738	35095	36643	3	3	0	16	12	4	2	1	1	35095	36643	0	MT-RNR2	rRNA	0	0	1	1
1927	69802	0	G	69788	A	6	5	1	0.01	6	5	1	3	3	0	69788	32920	36868	5	3	2	32920	36868	0	MT-RNR2	rRNA	0	0	1	1
1928	69183	0	A	69161	G	19	5	14	0.03	69161	32627	36534	1	0	1	19	5	14	2	0	2	32627	36534	0	MT-RNR2	rRNA	0	0	1	0
1929	68529	0	A	68486	G	28	8	20	0.04	68486	32573	35913	10	5	5	28	8	20	5	1	4	32573	35913	0	MT-RNR2	rRNA	0	0	1	0
1930	68744	0	C	68721	A	10	4	6	0.01	10	4	6	68721	32341	36380	3	3	0	10	1	9	32341	36380	0	MT-RNR2	rRNA	0	0	1	1
1931	68271	0	A	68239	G	21	10	11	0.03	68239	32310	35929	5	4	1	21	10	11	6	4	2	32310	35929	0	MT-RNR2	rRNA	0	0	1	0
1932	68520	0	G	68498	C	10	8	2	0.01	5	2	3	10	8	2	68498	32429	36069	7	6	1	32429	36069	0	MT-RNR2	rRNA	0	0	1	1
1933	67563	0	C	67531	T	17	8	9	0.03	9	6	3	67531	32332	35199	6	0	6	17	8	9	32332	35199	0	MT-RNR2	rRNA	0	0	1	0
1934	67934	0	T	67755	A	79	6	73	0.12	79	6	73	49	11	38	51	6	45	67755	32849	34906	32849	34906	2	MT-RNR2	rRNA	1	0	1	0
1935	68882	11	A	68849	G	25	11	14	0.04	68849	33312	35537	1	1	0	25	11	14	7	4	3	33312	35537	6	MT-RNR2	rRNA	1	0	1	0
1936	69335	0	A	69319	G	9	7	2	0.01	69319	33778	35541	2	1	1	9	7	2	5	2	3	33778	35541	5	MT-RNR2	rRNA	1	0	1	1
1937	69063	2	A	69023	G	23	15	8	0.03	69023	33523	35500	6	5	1	23	15	8	11	7	4	33523	35500	4	MT-RNR2	rRNA	1	0	1	0
1938	68375	0	A	68354	G	14	8	6	0.02	68354	33596	34758	5	5	0	14	8	6	2	2	0	33596	34758	3	MT-RNR2	rRNA	1	0	1	0
1939	67538	0	G	67506	A	13	9	4	0.02	13	9	4	8	7	1	67506	33152	34354	11	10	1	33152	34354	1	MT-RNR2	rRNA	1	0	1	1
1940	64480	0	A	64441	G	26	8	18	0.04	64441	33105	31336	6	6	0	26	8	18	7	4	3	33105	31336	0	MT-RNR2	rRNA	0	0	1	0
1941	63841	0	G	63798	A	19	5	14	0.03	19	5	14	13	7	6	63798	32896	30902	11	8	3	32896	30902	0	MT-RNR2	rRNA	0	0	1	0
1942	61704	0	C	61635	A	38	30	8	0.06	38	30	8	61635	32761	28874	3	2	1	28	4	24	32761	28874	0	MT-RNR2	rRNA	0	0	1	0
1943	57035	0	A	56765	G	202	25	177	0.35	56765	32865	23900	33	1	32	202	25	177	35	22	13	32865	23900	0	MT-RNR2	rRNA	0	0	1	0
1944	58448	0	C	58352	G	47	32	15	0.08	44	28	16	58352	33346	25006	47	32	15	5	1	4	33346	25006	0	MT-RNR2	rRNA	0	0	1	0
1945	46773	0	A	46629	G	81	41	40	0.17	46629	33382	13247	43	5	38	81	41	40	20	14	6	33382	13247	0	MT-RNR2	rRNA	0	0	1	0
1946	57967	1	C	57892	A	31	12	19	0.05	31	12	19	57892	32556	25336	17	10	7	27	22	5	32556	25336	0	MT-RNR2	rRNA	0	0	1	0
1947	57666	4	C	57629	A	17	14	3	0.03	17	14	3	57629	32538	25091	6	1	5	14	12	2	32538	25091	0	MT-RNR2	rRNA	0	0	1	1
1948	58157	0	C	58096	T	24	10	14	0.04	17	4	13	58096	33152	24944	20	13	7	24	10	14	33152	24944	0	MT-RNR2	rRNA	0	0	1	0
1949	58149	0	G	58048	A	75	13	62	0.13	75	13	62	10	7	3	58048	33136	24912	16	4	12	33136	24912	0	MT-RNR2	rRNA	0	0	1	0
1950	54659	0	T	54534	G	49	3	46	0.09	41	19	22	35	5	30	49	3	46	54534	32026	22508	32026	22508	0	MT-RNR2	rRNA	0	0	1	1
1951	55171	0	C	55136	T	13	4	9	0.02	9	7	2	55136	32663	22473	13	6	7	13	4	9	32663	22473	0	MT-RNR2	rRNA	0	0	1	1
1952	55027	0	T	54986	A	18	4	14	0.03	18	4	14	8	4	4	15	2	13	54986	32673	22313	32673	22313	0	MT-RNR2	rRNA	0	0	1	1
1953	54810	1	A	54793	T	7	6	1	0.01	54793	32640	22153	4	2	2	6	6	0	7	6	1	32640	22153	0	MT-RNR2	rRNA	0	0	1	1
1954	54536	0	T	54511	C	20	15	5	0.04	2	2	0	20	15	5	3	2	1	54511	32458	22053	32458	22053	0	MT-RNR2	rRNA	0	0	1	0
1955	54244	0	G	54221	A	9	5	4	0.02	9	5	4	6	5	1	54221	32222	21999	8	4	4	32222	21999	0	MT-RNR2	rRNA	0	0	1	1
1956	53820	0	T	53791	C	20	5	15	0.04	8	3	5	20	5	15	1	0	1	53791	31907	21884	31907	21884	0	MT-RNR2	rRNA	0	0	1	0
1957	54608	0	A	54586	T	9	2	7	0.02	54586	32183	22403	4	4	0	9	4	5	9	2	7	32183	22403	0	MT-RNR2	rRNA	0	0	1	1
1958	56373	0	G	56339	T	15	2	13	0.03	5	5	0	14	5	9	56339	32754	23585	15	2	13	32754	23585	0	MT-RNR2	rRNA	0	0	1	1
1959	61120	2	C	61043	A	39	18	21	0.06	39	18	21	61043	33290	27753	7	3	4	31	8	23	33290	27753	2	MT-RNR2	rRNA	1	0	1	0
1960	60339	19	A	60257	G	66	11	55	0.11	60257	32694	27563	6	3	3	66	11	55	10	2	8	32694	27563	6	MT-RNR2	rRNA	1	0	1	0
1961	60317	1	A	60280	G	25	14	11	0.04	60280	32692	27588	6	0	6	25	14	11	6	1	5	32692	27588	5	MT-RNR2	rRNA	1	0	1	0
1962	60401	0	A	60374	G	19	10	9	0.03	60374	32649	27725	3	2	1	19	10	9	5	3	2	32649	27725	4	MT-RNR2	rRNA	1	0	1	0
1963	60308	0	A	60280	G	13	6	7	0.02	60280	32676	27604	6	4	2	13	6	7	9	6	3	32676	27604	3	MT-RNR2	rRNA	1	0	1	0
1964	60955	0	T	60921	C	13	7	6	0.02	8	6	2	13	7	6	13	5	8	60921	32511	28410	32511	28410	1	MT-RNR2	rRNA	1	0	1	0
1965	59669	0	A	59640	G	15	6	9	0.03	59640	31233	28407	8	4	4	15	6	9	6	3	3	31233	28407	0	MT-RNR2	rRNA	0	0	1	0
1966	59767	0	G	59735	T	17	5	12	0.03	8	2	6	7	5	2	59735	31079	28656	17	5	12	31079	28656	0	MT-RNR2	rRNA	0	0	1	0
1967	57843	2	T	57659	C	150	7	143	0.26	18	14	4	150	7	143	16	4	12	57659	29559	28100	29559	28100	0	MT-RNR2	rRNA	0	0	1	0
1968	59426	0	G	59380	T	19	8	11	0.03	15	5	10	12	5	7	59380	30624	28756	19	8	11	30624	28756	0	MT-RNR2	rRNA	0	0	1	0
1969	58682	0	G	58634	A	24	14	10	0.04	24	14	10	13	7	6	58634	30543	28091	11	3	8	30543	28091	0	MT-RNR2	rRNA	0	0	1	0
1970	57746	0	G	57701	A	27	7	20	0.05	27	7	20	9	1	8	57701	30695	27006	9	5	4	30695	27006	0	MT-RNR2	rRNA	0	0	1	0
1971	57986	3	A	57778	G	189	12	177	0.33	57778	30766	27012	17	2	15	189	12	177	2	0	2	30766	27012	0	MT-RNR2	rRNA	0	0	1	0
1972	56974	1	A	56900	G	54	10	44	0.09	56900	30347	26553	9	2	7	54	10	44	11	3	8	30347	26553	0	MT-RNR2	rRNA	0	0	1	0
1973	56955	0	G	56916	A	19	1	18	0.03	19	1	18	8	4	4	56916	30333	26583	12	8	4	30333	26583	0	MT-RNR2	rRNA	0	0	1	1
1974	56819	0	A	56787	G	18	5	13	0.03	56787	30451	26336	6	4	2	18	5	13	8	0	8	30451	26336	0	MT-RNR2	rRNA	0	0	1	0
1975	57499	1	T	57457	A	16	5	11	0.03	16	5	11	10	3	7	16	11	5	57457	30402	27055	30402	27055	0	MT-RNR2	rRNA	0	0	1	0
1976	58076	0	T	58054	C	12	9	3	0.02	6	4	2	12	9	3	4	1	3	58054	30240	27814	30240	27814	0	MT-RNR2	rRNA	0	0	1	1
1977	58201	0	T	58178	G	10	7	3	0.02	4	1	3	9	2	7	10	7	3	58178	30479	27699	30479	27699	0	MT-RNR2	rRNA	0	0	1	1
1978	59085	0	A	59063	G	12	11	1	0.02	59063	30288	28775	4	2	2	12	11	1	6	1	5	30288	28775	0	MT-RNR2	rRNA	0	0	1	1
1979	60849	0	T	60821	C	16	4	12	0.03	9	5	4	16	4	12	3	2	1	60821	30074	30747	30074	30747	0	MT-RNR2	rRNA	0	0	1	1
1980	61937	0	A	61901	G	14	2	12	0.02	61901	29742	32159	10	2	8	14	2	12	12	3	9	29742	32159	0	MT-RNR2	rRNA	0	0	1	1
1981	63237	0	G	63219	T	10	4	6	0.02	4	1	3	4	2	2	63219	29860	33359	10	4	6	29860	33359	0	MT-RNR2	rRNA	0	0	1	1
1982	62907	0	G	62878	A	17	8	9	0.03	17	8	9	5	3	2	62878	29906	32972	7	3	4	29906	32972	0	MT-RNR2	rRNA	0	0	1	0
1983	61305	0	T	61267	C	30	7	23	0.05	4	3	1	30	7	23	4	1	3	61267	28617	32650	28617	32650	0	MT-RNR2	rRNA	0	0	1	0
1984	62329	4	A	62303	G	13	4	9	0.02	62303	29266	33037	7	2	5	13	4	9	6	1	5	29266	33037	0	MT-RNR2	rRNA	0	0	1	1
1985	62600	1	G	62576	A	13	3	10	0.02	13	3	10	2	2	0	62576	29535	33041	9	4	5	29535	33041	0	MT-RNR2	rRNA	0	0	1	1
1986	62322	1	A	62270	G	31	13	18	0.05	62270	29552	32718	10	7	3	31	13	18	11	3	8	29552	32718	0	MT-RNR2	rRNA	0	0	1	0
1987	62891	2	G	62862	A	12	9	3	0.02	12	9	3	6	4	2	62862	29781	33081	11	3	8	29781	33081	0	MT-RNR2	rRNA	0	0	1	1
1988	60291	1	G	60254	A	19	8	11	0.03	19	8	11	6	2	4	60254	27873	32381	12	5	7	27873	32381	0	MT-RNR2	rRNA	0	0	1	0
1989	60754	0	C	60718	T	16	5	11	0.03	14	11	3	60718	28752	31966	6	4	2	16	5	11	28752	31966	0	MT-RNR2	rRNA	0	0	1	0
1990	60333	0	G	60287	A	38	10	28	0.06	38	10	28	3	2	1	60287	28471	31816	5	1	4	28471	31816	0	MT-RNR2	rRNA	0	0	1	0
1991	58962	0	A	58921	G	31	12	19	0.05	58921	27992	30929	6	2	4	31	12	19	4	1	3	27992	30929	0	MT-RNR2	rRNA	0	0	1	0
1992	60498	2	C	60420	T	29	11	18	0.05	20	5	15	60420	28750	31670	29	8	21	29	11	18	28750	31670	0	MT-RNR2	rRNA	0	0	1	0
1993	60834	1	A	60716	G	86	8	78	0.14	60716	28694	32022	19	6	13	86	8	78	13	4	9	28694	32022	0	MT-RNR2	rRNA	0	0	1	0
1994	60529	0	A	60496	G	20	9	11	0.03	60496	28979	31517	3	2	1	20	9	11	10	5	5	28979	31517	0	MT-RNR2	rRNA	0	0	1	0
1995	54486	0	A	54459	C	10	4	6	0.02	54459	27693	26766	10	4	6	9	5	4	8	2	6	27693	26766	0	MT-RNR2	rRNA	0	0	1	1
1996	59423	0	C	59396	T	16	4	12	0.03	8	6	2	59396	27469	31927	3	3	0	16	4	12	27469	31927	0	MT-RNR2	rRNA	0	0	1	1
1997	59416	0	C	59388	T	14	5	9	0.02	9	5	4	59388	27836	31552	5	3	2	14	5	9	27836	31552	0	MT-RNR2	rRNA	0	0	1	0
1998	59482	0	T	59447	C	20	7	13	0.03	6	4	2	20	7	13	9	1	8	59447	27845	31602	27845	31602	0	MT-RNR2	rRNA	0	0	1	0
1999	59077	0	A	59010	T	24	6	18	0.04	59010	28072	30938	21	14	7	22	17	5	24	6	18	28072	30938	0	MT-RNR2	rRNA	0	0	1	0
[truncated: 14,574 more rows]

## Sheet: GM14468
pos	hq	indels	best	best_count	second_best	second_best_count	second_best_for	second_best_rev	fraction_percent	A	A.for	A.rev	C	C.for	C.rev	G	G.for	G.rev	T	T.for	T.rev	best_count.for	best_count.rev	LCR	gene	coding for	Filter A	Filter B	Filter C	Filter D
1	15	0	G	15	A	0	0	0	0	0	0	0	0	0	0	15	5	10	0	0	0	5	10	0	MT-DLOOP	D-LOOP	0	1	1	1
2	54	0	A	54	T	0	0	0	0	54	10	44	0	0	0	0	0	0	0	0	0	10	44	0	MT-DLOOP	D-LOOP	0	1	1	1
3	64	0	T	63	C	1	1	0	1.56	0	0	0	1	1	0	0	0	0	63	9	54	9	54	0	MT-DLOOP	D-LOOP	0	1	1	1
4	106	0	C	106	A	0	0	0	0	0	0	0	106	39	67	0	0	0	0	0	0	39	67	0	MT-DLOOP	D-LOOP	0	1	1	1
5	101	0	A	101	T	0	0	0	0	101	42	59	0	0	0	0	0	0	0	0	0	42	59	0	MT-DLOOP	D-LOOP	0	1	1	1
6	119	0	C	119	A	0	0	0	0	0	0	0	119	50	69	0	0	0	0	0	0	50	69	0	MT-DLOOP	D-LOOP	0	1	1	1
7	140	0	A	140	T	0	0	0	0	140	50	90	0	0	0	0	0	0	0	0	0	50	90	0	MT-DLOOP	D-LOOP	0	1	1	1
8	207	0	G	207	A	0	0	0	0	0	0	0	0	0	0	207	57	150	0	0	0	57	150	0	MT-DLOOP	D-LOOP	0	1	1	1
9	258	0	G	258	A	0	0	0	0	0	0	0	0	0	0	258	61	197	0	0	0	61	197	0	MT-DLOOP	D-LOOP	0	1	1	1
10	279	0	T	279	A	0	0	0	0	0	0	0	0	0	0	0	0	0	279	61	218	61	218	0	MT-DLOOP	D-LOOP	0	1	1	1
11	298	0	C	298	A	0	0	0	0	0	0	0	298	67	231	0	0	0	0	0	0	67	231	0	MT-DLOOP	D-LOOP	0	1	1	1
12	300	0	T	300	A	0	0	0	0	0	0	0	0	0	0	0	0	0	300	74	226	74	226	0	MT-DLOOP	D-LOOP	0	1	1	1
13	269	0	A	269	T	0	0	0	0	269	75	194	0	0	0	0	0	0	0	0	0	75	194	0	MT-DLOOP	D-LOOP	0	1	1	1
14	278	0	T	278	A	0	0	0	0	0	0	0	0	0	0	0	0	0	278	77	201	77	201	0	MT-DLOOP	D-LOOP	0	1	1	1
15	305	0	C	305	A	0	0	0	0	0	0	0	305	83	222	0	0	0	0	0	0	83	222	0	MT-DLOOP	D-LOOP	0	1	1	1
16	158	0	A	155	G	2	2	0	1.27	155	84	71	0	0	0	2	2	0	1	1	0	84	71	0	MT-DLOOP	D-LOOP	0	1	1	1
17	353	0	C	353	A	0	0	0	0	0	0	0	353	99	254	0	0	0	0	0	0	99	254	0	MT-DLOOP	D-LOOP	0	1	1	1
18	360	0	C	360	A	0	0	0	0	0	0	0	360	104	256	0	0	0	0	0	0	104	256	0	MT-DLOOP	D-LOOP	0	1	1	1
19	363	0	C	363	A	0	0	0	0	0	0	0	363	118	245	0	0	0	0	0	0	118	245	0	MT-DLOOP	D-LOOP	0	1	1	1
20	381	0	T	381	A	0	0	0	0	0	0	0	0	0	0	0	0	0	381	125	256	125	256	0	MT-DLOOP	D-LOOP	0	1	1	1
21	401	0	A	401	T	0	0	0	0	401	140	261	0	0	0	0	0	0	0	0	0	140	261	0	MT-DLOOP	D-LOOP	0	1	1	1
22	412	0	T	412	A	0	0	0	0	0	0	0	0	0	0	0	0	0	412	141	271	141	271	0	MT-DLOOP	D-LOOP	0	1	1	1
23	416	0	T	416	A	0	0	0	0	0	0	0	0	0	0	0	0	0	416	147	269	147	269	0	MT-DLOOP	D-LOOP	0	1	1	1
24	425	0	A	423	G	2	0	2	0.47	423	151	272	0	0	0	2	0	2	0	0	0	151	272	0	MT-DLOOP	D-LOOP	0	1	1	1
25	444	0	A	444	T	0	0	0	0	444	151	293	0	0	0	0	0	0	0	0	0	151	293	0	MT-DLOOP	D-LOOP	0	1	1	1
26	487	0	C	487	A	0	0	0	0	0	0	0	487	152	335	0	0	0	0	0	0	152	335	0	MT-DLOOP	D-LOOP	0	1	1	1
27	472	0	C	472	A	0	0	0	0	0	0	0	472	153	319	0	0	0	0	0	0	153	319	0	MT-DLOOP	D-LOOP	0	1	1	1
28	386	0	A	385	G	1	1	0	0.26	385	154	231	0	0	0	1	1	0	0	0	0	154	231	0	MT-DLOOP	D-LOOP	0	1	1	1
29	506	0	C	506	A	0	0	0	0	0	0	0	506	175	331	0	0	0	0	0	0	175	331	0	MT-DLOOP	D-LOOP	0	1	1	1
30	481	0	T	481	A	0	0	0	0	0	0	0	0	0	0	0	0	0	481	176	305	176	305	0	MT-DLOOP	D-LOOP	0	1	1	1
31	495	0	C	495	A	0	0	0	0	0	0	0	495	191	304	0	0	0	0	0	0	191	304	0	MT-DLOOP	D-LOOP	0	1	1	1
32	491	0	A	491	T	0	0	0	0	491	193	298	0	0	0	0	0	0	0	0	0	193	298	0	MT-DLOOP	D-LOOP	0	1	1	1
33	552	0	C	552	A	0	0	0	0	0	0	0	552	215	337	0	0	0	0	0	0	215	337	0	MT-DLOOP	D-LOOP	0	1	1	1
34	589	0	G	589	A	0	0	0	0	0	0	0	0	0	0	589	241	348	0	0	0	241	348	0	MT-DLOOP	D-LOOP	0	1	1	1
35	597	0	G	596	T	1	1	0	0.17	0	0	0	0	0	0	596	246	350	1	1	0	246	350	0	MT-DLOOP	D-LOOP	0	1	1	1
36	615	0	G	614	A	1	1	0	0.16	1	1	0	0	0	0	614	261	353	0	0	0	261	353	0	MT-DLOOP	D-LOOP	0	1	1	1
37	627	0	A	626	G	1	1	0	0.16	626	261	365	0	0	0	1	1	0	0	0	0	261	365	0	MT-DLOOP	D-LOOP	0	1	1	1
38	634	0	G	633	C	1	1	0	0.16	0	0	0	1	1	0	633	267	366	0	0	0	267	366	0	MT-DLOOP	D-LOOP	0	1	1	1
39	651	0	C	651	A	0	0	0	0	0	0	0	651	280	371	0	0	0	0	0	0	280	371	0	MT-DLOOP	D-LOOP	0	1	1	1
40	645	0	T	643	C	2	2	0	0.31	0	0	0	2	2	0	0	0	0	643	285	358	285	358	0	MT-DLOOP	D-LOOP	0	1	1	1
41	687	0	C	685	T	2	2	0	0.29	0	0	0	685	305	380	0	0	0	2	2	0	305	380	0	MT-DLOOP	D-LOOP	0	1	1	1
42	697	0	T	696	C	1	1	0	0.14	0	0	0	1	1	0	0	0	0	696	311	385	311	385	0	MT-DLOOP	D-LOOP	0	1	1	1
43	708	0	C	704	T	4	3	1	0.56	0	0	0	704	317	387	0	0	0	4	3	1	317	387	0	MT-DLOOP	D-LOOP	0	1	1	1
44	865	0	C	864	T	1	1	0	0.12	0	0	0	864	328	536	0	0	0	1	1	0	328	536	0	MT-DLOOP	D-LOOP	0	1	1	1
45	865	0	A	863	T	2	0	2	0.23	863	331	532	0	0	0	0	0	0	2	0	2	331	532	0	MT-DLOOP	D-LOOP	0	1	1	1
46	879	0	T	878	C	1	1	0	0.11	0	0	0	1	1	0	0	0	0	878	341	537	341	537	0	MT-DLOOP	D-LOOP	0	1	1	1
47	897	0	G	897	A	0	0	0	0	0	0	0	0	0	0	897	353	544	0	0	0	353	544	0	MT-DLOOP	D-LOOP	0	1	1	1
48	890	0	C	890	A	0	0	0	0	0	0	0	890	353	537	0	0	0	0	0	0	353	537	0	MT-DLOOP	D-LOOP	0	1	1	1
49	887	0	A	886	G	1	1	0	0.11	886	363	523	0	0	0	1	1	0	0	0	0	363	523	0	MT-DLOOP	D-LOOP	0	1	1	1
50	917	0	T	917	A	0	0	0	0	0	0	0	0	0	0	0	0	0	917	367	550	367	550	0	MT-DLOOP	D-LOOP	0	1	1	1
51	916	0	T	915	C	1	1	0	0.11	0	0	0	1	1	0	0	0	0	915	373	542	373	542	0	MT-DLOOP	D-LOOP	0	1	1	1
52	923	0	T	923	A	0	0	0	0	0	0	0	0	0	0	0	0	0	923	379	544	379	544	0	MT-DLOOP	D-LOOP	0	1	1	1
53	942	0	G	942	A	0	0	0	0	0	0	0	0	0	0	942	380	562	0	0	0	380	562	0	MT-DLOOP	D-LOOP	0	1	1	1
54	937	0	G	937	A	0	0	0	0	0	0	0	0	0	0	937	391	546	0	0	0	391	546	0	MT-DLOOP	D-LOOP	0	1	1	1
55	935	0	T	935	A	0	0	0	0	0	0	0	0	0	0	0	0	0	935	384	551	384	551	0	MT-DLOOP	D-LOOP	0	1	1	1
56	934	0	A	934	T	0	0	0	0	934	406	528	0	0	0	0	0	0	0	0	0	406	528	2	MT-DLOOP	D-LOOP	1	1	1	1
57	984	0	T	983	G	1	0	1	0.1	0	0	0	0	0	0	1	0	1	983	416	567	416	567	6	MT-DLOOP	D-LOOP	1	1	1	1
58	990	0	T	990	A	0	0	0	0	0	0	0	0	0	0	0	0	0	990	420	570	420	570	5	MT-DLOOP	D-LOOP	1	1	1	1
59	970	0	T	970	A	0	0	0	0	0	0	0	0	0	0	0	0	0	970	421	549	421	549	4	MT-DLOOP	D-LOOP	1	1	1	1
60	908	0	T	908	A	0	0	0	0	0	0	0	0	0	0	0	0	0	908	421	487	421	487	3	MT-DLOOP	D-LOOP	1	1	1	1
61	962	0	C	962	A	0	0	0	0	0	0	0	962	423	539	0	0	0	0	0	0	423	539	1	MT-DLOOP	D-LOOP	1	1	1	1
62	1027	0	G	1027	A	0	0	0	0	0	0	0	0	0	0	1027	429	598	0	0	0	429	598	0	MT-DLOOP	D-LOOP	0	0	1	1
63	1013	0	T	1013	A	0	0	0	0	0	0	0	0	0	0	0	0	0	1013	428	585	428	585	0	MT-DLOOP	D-LOOP	0	0	1	1
64	1056	0	C	1056	A	0	0	0	0	0	0	0	1056	460	596	0	0	0	0	0	0	460	596	0	MT-DLOOP	D-LOOP	0	0	1	1
65	1018	0	T	1015	G	2	1	1	0.2	0	0	0	1	1	0	2	1	1	1015	473	542	473	542	2	MT-DLOOP	D-LOOP	1	0	1	1
66	1128	2	G	1126	T	1	1	0	0.09	0	0	0	1	1	0	1126	481	645	1	1	0	481	645	2	MT-DLOOP	D-LOOP	1	0	1	1
67	1146	0	G	1146	A	0	0	0	0	0	0	0	0	0	0	1146	484	662	0	0	0	484	662	2	MT-DLOOP	D-LOOP	1	0	1	1
68	1170	0	G	1170	A	0	0	0	0	0	0	0	0	0	0	1170	517	653	0	0	0	517	653	4	MT-DLOOP	D-LOOP	1	0	1	1
69	1187	0	G	1185	A	1	1	0	0.08	1	1	0	1	0	1	1185	519	666	0	0	0	519	666	3	MT-DLOOP	D-LOOP	1	0	1	1
70	1202	0	G	1202	A	0	0	0	0	0	0	0	0	0	0	1202	535	667	0	0	0	535	667	1	MT-DLOOP	D-LOOP	1	0	1	1
71	1174	0	G	1172	A	2	1	1	0.17	2	1	1	0	0	0	1172	535	637	0	0	0	535	637	1	MT-DLOOP	D-LOOP	1	0	1	1
72	831	0	T	831	A	0	0	0	0	0	0	0	0	0	0	0	0	0	831	185	646	185	646	1	MT-DLOOP	D-LOOP	1	1	1	1
73	1105	0	G	1104	C	1	0	1	0.09	0	0	0	1	0	1	1104	453	651	0	0	0	453	651	0	MT-DLOOP	D-LOOP	0	0	1	1
74	1053	0	T	1053	A	0	0	0	0	0	0	0	0	0	0	0	0	0	1053	426	627	426	627	0	MT-DLOOP	D-LOOP	0	0	1	1
75	1190	0	G	1190	A	0	0	0	0	0	0	0	0	0	0	1190	591	599	0	0	0	591	599	0	MT-DLOOP	D-LOOP	0	0	1	1
76	1291	0	C	1291	A	0	0	0	0	0	0	0	1291	676	615	0	0	0	0	0	0	676	615	0	MT-DLOOP	D-LOOP	0	0	1	1
77	1226	0	A	1224	C	1	1	0	0.08	1224	686	538	1	1	0	1	1	0	0	0	0	686	538	0	MT-DLOOP	D-LOOP	0	0	1	1
78	1369	0	C	1366	T	2	2	0	0.15	0	0	0	1366	728	638	1	0	1	2	2	0	728	638	0	MT-DLOOP	D-LOOP	0	0	1	1
79	1413	0	G	1412	A	1	0	1	0.07	1	0	1	0	0	0	1412	740	672	0	0	0	740	672	0	MT-DLOOP	D-LOOP	0	0	1	1
80	1424	0	C	1424	A	0	0	0	0	0	0	0	1424	758	666	0	0	0	0	0	0	758	666	0	MT-DLOOP	D-LOOP	0	0	1	1
81	1426	0	G	1426	A	0	0	0	0	0	0	0	0	0	0	1426	760	666	0	0	0	760	666	0	MT-DLOOP	D-LOOP	0	0	1	1
82	1424	0	A	1424	T	0	0	0	0	1424	758	666	0	0	0	0	0	0	0	0	0	758	666	0	MT-DLOOP	D-LOOP	0	0	1	1
83	1481	0	T	1480	A	1	1	0	0.07	1	1	0	0	0	0	0	0	0	1480	763	717	763	717	0	MT-DLOOP	D-LOOP	0	0	1	1
84	1461	0	A	1461	T	0	0	0	0	1461	776	685	0	0	0	0	0	0	0	0	0	776	685	0	MT-DLOOP	D-LOOP	0	0	1	1
85	1528	0	G	1527	T	1	1	0	0.07	0	0	0	0	0	0	1527	783	744	1	1	0	783	744	0	MT-DLOOP	D-LOOP	0	0	1	1
86	1527	0	C	1527	A	0	0	0	0	0	0	0	1527	797	730	0	0	0	0	0	0	797	730	0	MT-DLOOP	D-LOOP	0	0	1	1
87	1432	0	A	1432	T	0	0	0	0	1432	804	628	0	0	0	0	0	0	0	0	0	804	628	0	MT-DLOOP	D-LOOP	0	0	1	1
88	1547	0	T	1547	A	0	0	0	0	0	0	0	0	0	0	0	0	0	1547	808	739	808	739	0	MT-DLOOP	D-LOOP	0	0	1	1
89	1470	0	T	1470	A	0	0	0	0	0	0	0	0	0	0	0	0	0	1470	807	663	807	663	0	MT-DLOOP	D-LOOP	0	0	1	1
90	1577	0	G	1576	A	1	1	0	0.06	1	1	0	0	0	0	1576	825	751	0	0	0	825	751	0	MT-DLOOP	D-LOOP	0	0	1	1
91	1569	0	C	1569	A	0	0	0	0	0	0	0	1569	827	742	0	0	0	0	0	0	827	742	0	MT-DLOOP	D-LOOP	0	0	1	1
[truncated: 16,482 more rows]

## Sheet: GM14447
pos	hq	indels	best	best_count	second_best	second_best_count	second_best_for	second_best_rev	fraction_percent	A	A.for	A.rev	C	C.for	C.rev	G	G.for	G.rev	T	T.for	T.rev	best_count.for	best_count.rev	LCR	gene	coding for	Filter A	Filter B	Filter C	Filter D
[truncated: 16,573 more rows]

[truncated: 2 more sheets: GM14432, legend]
